# Supplementary material for: A Ni-catalyzed asymmetric C(sp)–P cross-coupling reaction for the synthesis of P-stereogenic alkynylphosphines
Source: Royal Society of Chemistry journal article supplement (doi:10.1039/d2sc05841c), 2023-01-01
Supplement: d2sc05841c1.pdf [file d2sc05841c1.pdf]

## Supporting Information for

# Ni-Catalyzed Asymmetric C(sp)–P Cross Coupling Reaction for the Synthesis of *P*-Stereogenic Alkynyl phosphines

*Bin Zhang, Wen-Qing Zhou, Xu-Teng Liu, Yingying Sun, and Qing-Wei Zhang\**

*Department of Chemistry, University of Science and Technology of China, Hefei 230026, China*  
*Correspondence to: qingweiz@ustc.edu.cn*

## INDEX

|                                                                  |             |
|------------------------------------------------------------------|-------------|
| <b>1. General information .....</b>                              | <b>S3</b>   |
| <b>2. Optimization of reaction conditions .....</b>              | <b>S4</b>   |
| <b>3. The confirmation of absolute configuration .....</b>       | <b>S10</b>  |
| <b>4. General procedure for the synthesis of substrates.....</b> | <b>S13</b>  |
| <b>5. Asymmetric synthesis of alkynyl phosphines.....</b>        | <b>S14</b>  |
| <b>6. Synthetic applications.....</b>                            | <b>S15</b>  |
| <b>7. Spectroscopic data of products.....</b>                    | <b>S17</b>  |
| <b>8. Copies of NMR spectroscopy.....</b>                        | <b>S29</b>  |
| <b>9. Copies of HPLC.....</b>                                    | <b>S112</b> |
| <b>10. References.....</b>                                       | <b>S154</b> |

## General information

Chemicals and reagents were purchased and used directly unless otherwise stated. Reactions were carried out in a glovebox flushed with N<sub>2</sub> and were monitored by thin-layer chromatography (TLC) on gel F254 plates. Flash column chromatography or preparative thin-layer chromatography was performed using the silica gel (300-400 mesh, GF254, respectively). All reactions were performed in a N<sub>2</sub> flushed glovebox unless otherwise noted. THF and toluene were distilled over sodium and degassed with N<sub>2</sub>. Other Super dry solvents were purchased and used directly. NMR spectra (<sup>1</sup>H, <sup>13</sup>C, <sup>31</sup>P, <sup>19</sup>F) spectra were recorded on Bruker Aescend™ 500 MHz instruments in CDCl<sub>3</sub>, DMSO-*d*<sub>6</sub>, C<sub>6</sub>D<sub>6</sub>, acetone-*d*<sub>6</sub>, CD<sub>2</sub>Cl<sub>2</sub>. The residual solvent peak or tetramethylsilane (TMS) is used as an internal reference. <sup>1</sup>H NMR data are reported as follows: chemical shifts (δ ppm), multiplicity (s = singlet, d = doublet, t = triplet, q = quartet, m = multiplet, b = broad ), coupling constant (Hz), integration. Data for <sup>13</sup>C, <sup>31</sup>P, and <sup>19</sup>F NMR are reported in terms of chemical shifts and multiplicity where appropriate. High-resolution mass spectral analysis (HRMS) data were measured by means of the ESI technique. Enantiomer excess was determined by HPLC analysis using Darcel Chiracel columns (AD-H, OD-H, OJ-H, IA-H, IB-H and IH) and <sup>n</sup>hexane/<sup>t</sup>PrOH as eluents. Optical rotations were measured by Perkin-Elmer-343 polarimeter. Fluorescence spectra were measured on a Fluorolog-3-Tau and deltaflex. Circularly polarized luminescence (CPL) was conducted by JASCO CPL-300 in Anhui University.

## 2. Optimization of reaction conditions.

**Table S1. Screening of chiral ligands.<sup>a</sup>**

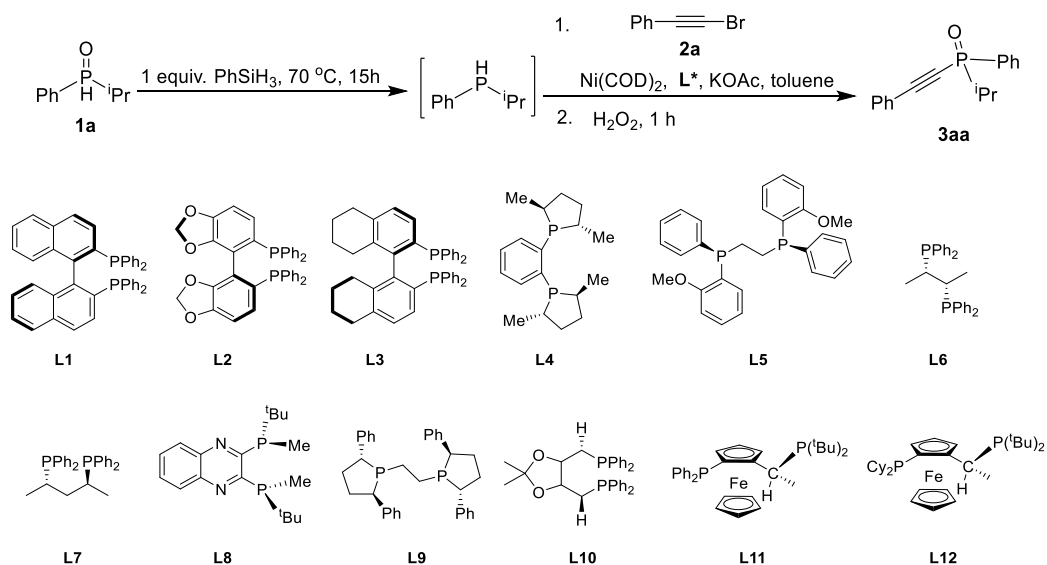

| Entry | Ligand | Ee (%) <sup>b</sup> | Yield (%) <sup>c</sup> |
|-------|--------|---------------------|------------------------|
| 1     | L1     | 0                   | 67                     |
| 2     | L2     | 0                   | 45                     |
| 3     | L3     | 0                   | 74                     |
| 4     | L4     | 58                  | 62                     |
| 5     | L5     | 0                   | 84                     |
| 6     | L6     | -14                 | 89                     |
| 7     | L7     | 0                   | 20                     |
| 8     | L8     | 26                  | 90                     |
| 9     | L9     | 4                   | 50                     |
| 10    | L10    | 0                   | 42                     |
| 11    | L11    | 0                   | 80                     |
| 12    | L12    | 0                   | 76                     |

<sup>a</sup>Reaction conditions: 0.1 mmol **1a**, 0.2 mmol **2a**, 5 mol%  $\text{Ni}(\text{COD})_2$ , 6 mol% Ligand and 0.2 mmol  $\text{KOAc}$  in 1 mL toluene at room temperature for 16 h under nitrogen atmosphere. Quenched with 0.2 mL 30%  $\text{H}_2\text{O}_2$  aqueous solution.

<sup>b</sup>Determined by chiral HPLC analysis.

<sup>c</sup>NMR yield based on **1a** using  $\text{P}(\text{O})(\text{OMe})_3$  as an internal standard.

**Table S2. Screening of base.<sup>a</sup>**

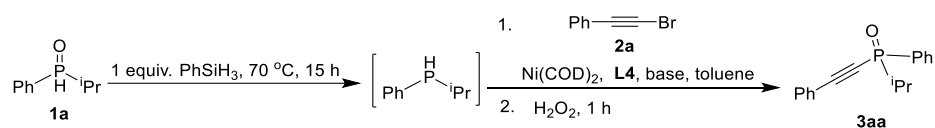

| Entry           | Base                            | Ee (%) <sup>b</sup> | Yield (%) <sup>c</sup> |
|-----------------|---------------------------------|---------------------|------------------------|
| 1               | no                              | 0                   | 45                     |
| 2               | KOAc                            | 58                  | 62                     |
| 3               | K <sub>2</sub> CO <sub>3</sub>  | 2                   | 75                     |
| 4               | K <sub>3</sub> PO <sub>4</sub>  | 41                  | 60                     |
| 5               | CH <sub>3</sub> OK              | 56                  | 80                     |
| 6               | K <sub>2</sub> HPO <sub>4</sub> | 50                  | 98                     |
| 7               | CF <sub>3</sub> COOK            | 0                   | 100                    |
| 8               | <sup>t</sup> BuCOOK             | 60                  | 35                     |
| 9               | KOH                             | 54                  | 51                     |
| 10              | DBU                             | 38                  | 90                     |
| 11              | DIEA                            | 16                  | 90                     |
| 12              | NaOAc                           | 64                  | 80                     |
| 13              | CsOAc                           | 63                  | 80                     |
| 14              | LiOAc                           | 6                   | 50                     |
| 15 <sup>d</sup> | NaOAc                           | 64                  | 85                     |

<sup>a</sup>Reaction conditions: 0.1 mmol **1a**, 0.2 mmol **2a**, 5 mol% Ni(COD)<sub>2</sub>, 6 mol% **L4** and 0.2 mmol base in 1 mL toluene at room temperature for 16 h under nitrogen atmosphere. Quenched with 0.2 mL 30% H<sub>2</sub>O<sub>2</sub> aqueous solution.

<sup>b</sup>Determined by chiral HPLC analysis.

<sup>c</sup>NMR yield based on **1a** using P(O)(OMe)<sub>3</sub> as an internal standard.

<sup>d</sup>0.25 mmol NaOAc was used.

**Table S3. Screening of solvents.<sup>a</sup>**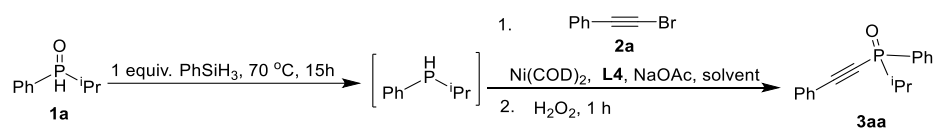

| Entry | Solvent                         | Ee (%) <sup>b</sup> | Yield (%) <sup>c</sup> |
|-------|---------------------------------|---------------------|------------------------|
| 1     | toluene                         | 64                  | 85                     |
| 2     | mesitylene                      | 66                  | 85                     |
| 3     | <i>p</i> -xylene                | 56                  | 70                     |
| 4     | THF                             | 56                  | 50                     |
| 5     | CPME                            | 55                  | 80                     |
| 6     | acetone                         | 0                   | 10                     |
| 7     | CH <sub>3</sub> CN              | 0                   | 17                     |
| 8     | EtOAc                           | 60                  | 35                     |
| 9     | CH <sub>2</sub> Cl <sub>2</sub> | 2                   | 93                     |

<sup>a</sup>Reaction conditions: 0.1 mmol **1a**, 0.2 mmol **2a**, 5 mol% Ni(COD)<sub>2</sub>, 6 mol% **L4** and 0.25 mmol NaOAc in 1 mL solvent at room temperature for 16 h under nitrogen atmosphere. Quenched with 0.2 mL 30% H<sub>2</sub>O<sub>2</sub> aqueous solution.

<sup>b</sup>Determined by chiral HPLC analysis.

<sup>c</sup>NMR yield based on **1a** using P(O)(OMe)<sub>3</sub> as an internal standard.

**Table S4. Screening of catalyst.<sup>a</sup>**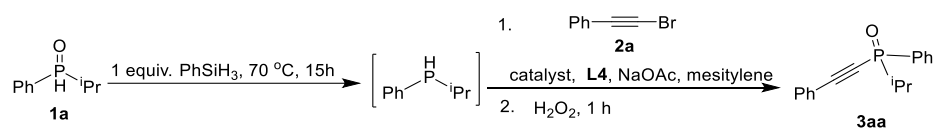

| Entry                | Catalyst                      | Ee (%) <sup>d</sup> | Yield (%) <sup>b</sup> |
|----------------------|-------------------------------|---------------------|------------------------|
| <b>1</b>             | no                            | <b>0</b>            | <b>20</b>              |
| <b>2</b>             | <b>Ni(COD)<sub>2</sub></b>    | <b>66</b>           | <b>84</b>              |
| <b>3</b>             | <b>NiBr<sub>2</sub>DME</b>    | <b>12</b>           | <b>30</b>              |
| <b>4</b>             | <b>NiCl<sub>2</sub>DME</b>    | <b>2</b>            | <b>28</b>              |
| <b>5</b>             | <b>Ni(acac)<sub>2</sub></b>   | <b>34</b>           | <b>36</b>              |
| <b>6</b>             | <b>Ni(COD)<sub>2</sub>/Zn</b> | <b>32</b>           | <b>56</b>              |
| <b>7<sup>d</sup></b> | <b>Ni(COD)<sub>2</sub></b>    | <b>66</b>           | <b>83</b>              |

<sup>a</sup>Reaction conditions: 0.1 mmol **1a**, 0.2 mmol **2a**, 5 mol% catalyst, 6 mol% L4 and 0.25 mmol NaOAc in 1 mL mesitylene at room temperature for 16 h under nitrogen atmosphere. Quenched with 0.2 mL 30% H<sub>2</sub>O<sub>2</sub> aqueous solution.

<sup>b</sup>Determined by chiral HPLC analysis.

<sup>c</sup>NMR yield based on **1a** using P(O)(OMe)<sub>3</sub> as an internal standard.

<sup>d</sup>10 mol% catalyst and 12 mol% L4 were used.

**Table S5. Screening of temperature.<sup>a</sup>**

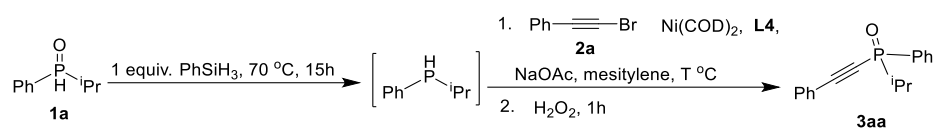

| Entry | T °C | Ee (%) <sup>b</sup> | Yield (%) <sup>c</sup> |
|-------|------|---------------------|------------------------|
| 1     | 0    | 42                  | 80                     |
| 2     | -10  | 30                  | 50                     |
| 3     | 25   | 66                  | 84                     |
| 4     | 35   | 64                  | 87                     |
| 5     | 50   | 7                   | 87                     |

<sup>a</sup>Reaction conditions: 0.1 mmol **1a**, 0.2 mmol **2a**, 5 mol%  $\text{Ni(COD)}_2$ , 6 mol% **L4** and 0.25 mmol NaOAc in 1 mL mesitylene at T °C for 10-50 h under nitrogen atmosphere. Quenched with 0.2 mL 30%  $\text{H}_2\text{O}_2$  aqueous solution.

<sup>b</sup>Determined by chiral HPLC analysis.

<sup>c</sup>NMR yield based on **1a** using  $\text{P(O)(OMe)}_3$  as an internal standard.



**Table S6. Screening of chiral Duphos ligands.<sup>a</sup>**

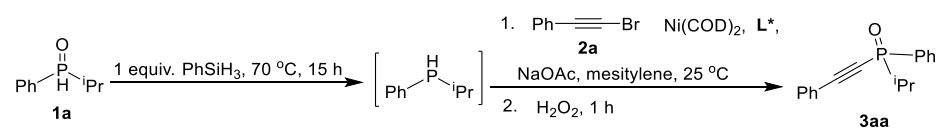

| Entry                  | L*                                 | Ee (%) <sup>b</sup> | Yield (%) <sup>c</sup> |
|------------------------|------------------------------------|---------------------|------------------------|
| <b>1</b>               | ( <i>S,S</i> )-Me-Duphos           | <b>66</b>           | <b>84</b>              |
| <b>2</b>               | ( <i>S,S</i> )-Et-Duphos           | <b>75</b>           | <b>83</b>              |
| <b>3</b>               | ( <i>S,S</i> )- <i>i</i> Pr-Duphos | <b>3</b>            | <b>48</b>              |
| <b>4<sup>d,e</sup></b> | ( <i>S,S</i> )-Et-Duphos           | <b>78</b>           | <b>84(80)</b>          |

<sup>a</sup>Reaction conditions: 0.1 mmol **1a**, 0.2 mmol **2a**, 5 mol% Ni(COD)<sub>2</sub>, 6 mol% L\* and 0.25 mmol NaOAc in 1 mL mesitylene at 25 °C for 16 h under nitrogen atmosphere. Quenched with 0.2 mL 30% H<sub>2</sub>O<sub>2</sub> aqueous solution.

<sup>b</sup>Determined by chiral HPLC analysis.

<sup>c</sup>NMR yield based on **1a** using P(O)(OMe)<sub>3</sub> as an internal standard.

<sup>d</sup>0.2 mmol **1a**, 0.1 mmol **2a** were used.

<sup>e</sup>Isolated yields were given in parentheses.

### 3. The confirmation of absolute configuration.

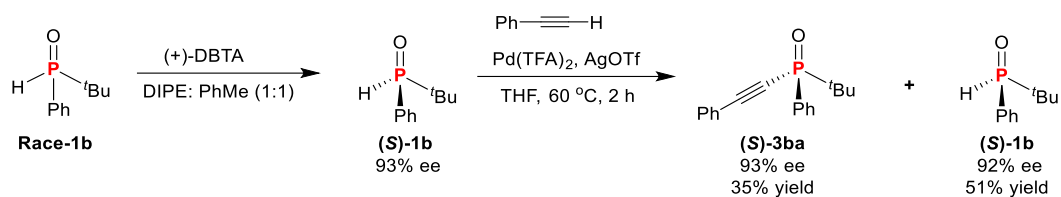

(*S*)-*tert*-butyl(phenyl)phosphine oxide (**(S)-1b**) was prepared according to the following procedure<sup>S1</sup>: (+)-(*S,S*)-dibenzoyltartaric acid (590 mg, 1.65 mmol) *tert*-butyl(phenyl)phosphine oxide (250 mg, 1.37 mmol) were dissolved in little as possible refluxing diisopropyl ether/toluene (1:1). The mixture was slowly cooled down to r.t. to give the (*S*)-SPO-DBTA complex as colorless crystals. The solid was filtered and re-dissolved in 1 M NaOH (10 mL) and CHCl<sub>3</sub> (10 mL). The aqueous phase was extracted with CHCl<sub>3</sub> (5 x 5 mL). The combined organic phase was dried and concentrated under reduced pressure to give (*S*)-*tert*-butyl(phenyl)phosphine oxide.

HPLC: **Racemate-1b**, Chiralpak AD-H, <sup>n</sup>hexane/ <sup>i</sup>PrOH 90:10, flow: 1.0 mL/min.

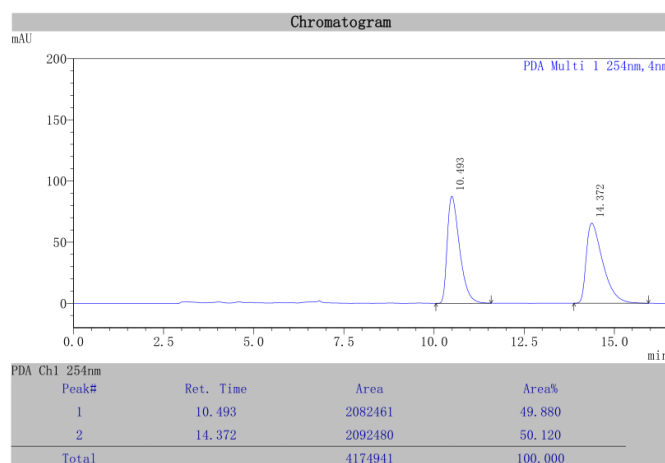

(*S*)-**1b**, 93% ee,  $t_1 = 10.6$  min, Chiralpak AD-H, <sup>n</sup>hexane/ <sup>i</sup>PrOH 90:10, flow: 1.0 mL/min.

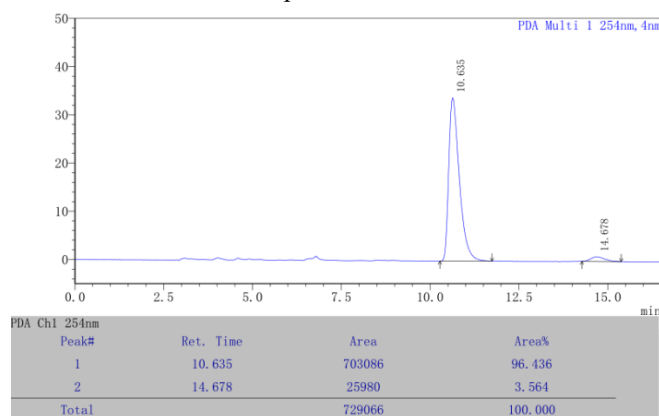

(*R*)-**1b**, 78% ee,  $t_2 = 14.6$  min, Chiralpak AD-H, <sup>n</sup>hexane/ <sup>i</sup>PrOH 90:10, flow: 1.0 mL/min.

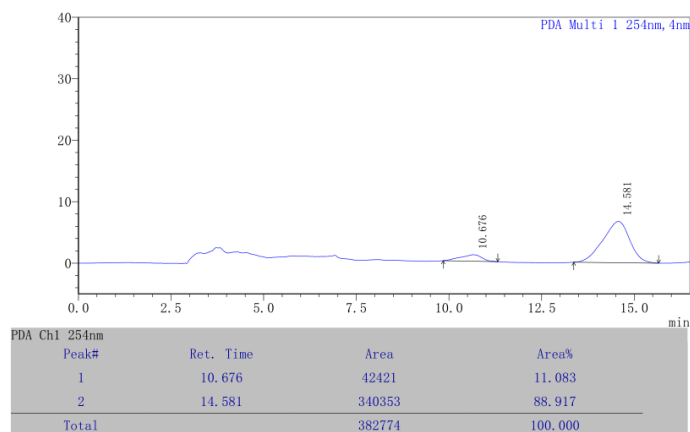

(*S*)-*tert*-butyl(phenyl)(phenylethynyl)phosphine oxide (**S**)-**3ba** was prepared according to the following procedure<sup>9</sup>: Under N<sub>2</sub> atmosphere, 0.1 mmol (**S**)-**3b**, 0.1 mmol phenylacetylene, 10 mol% Pd(TFA)<sub>2</sub>, 0.4 mmol AgOTf and 1 mL THF were charged into a 4 mL schlenk tube, the mixture was stirred at 60 °C for 2 hours. The ee% of (**S**)-**3b** and (**S**)-**3ba** were monitored by HPLC. The yields were determined by <sup>31</sup>P NMR using P(O)(OMe)<sub>3</sub> as an internal standard.

HPLC: **Race-3ba**, Chiralpak OJ-H, <sup>n</sup>hexane/ <sup>i</sup>PrOH 90:10, flow: 1.0 mL/min.

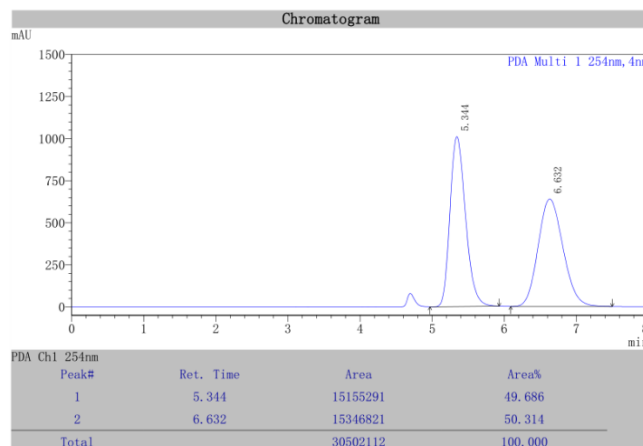

(*S*)-**3ba**, 93% ee,  $t_2 = 6.4$  min, Chiralpak OJ-H, <sup>n</sup>hexane/ <sup>i</sup>PrOH 90:10, flow: 1.0 mL/min.

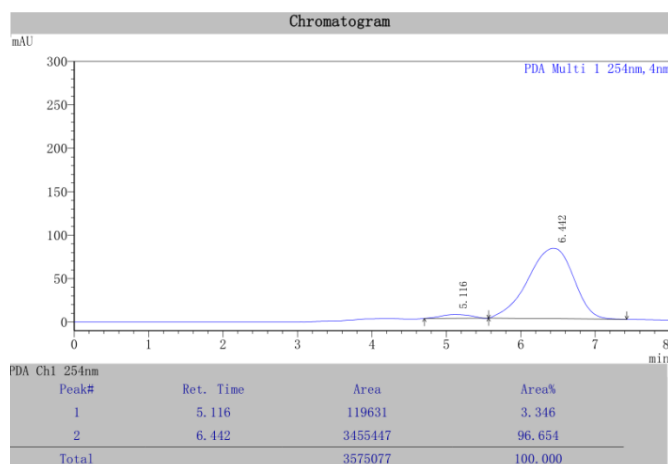

**3ba**, 86% ee,  $t_2 = 6.7$  min, Chiralpak OJ-H,  $n$ hexane/  $i$ PrOH 90:10, flow: 1.0 mL/min.

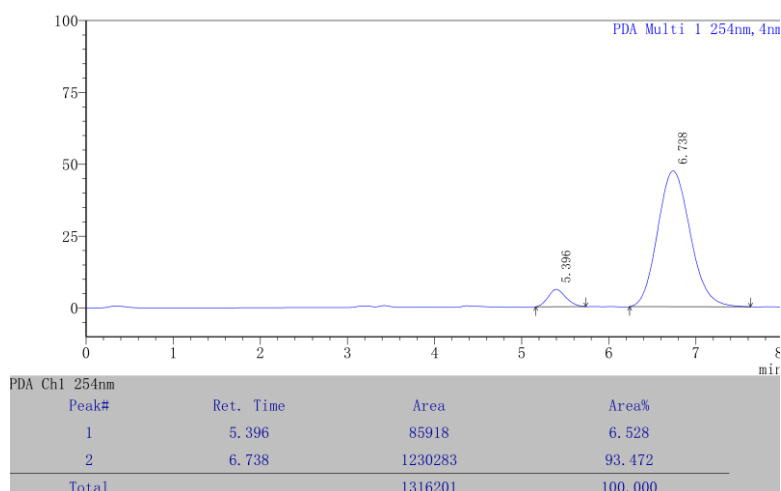

Residual (*S*)-**1b**, 92% ee,  $t_1 = 10.6$  min, Chiralpak AD-H,  $n$ hexane/  $i$ PrOH 90:10, flow: 1.0 mL/min.

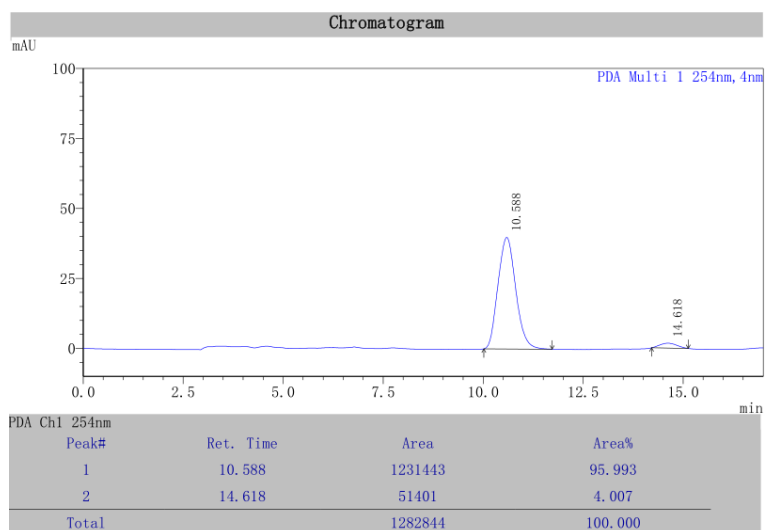

The absolute configuration of *P*-stereogenic alkynyl phosphine oxide **3ba** via Ni-catalyzed asymmetric C(sp) $-P$  cross coupling was unambiguously determined to be *S* according to above HPLCs.

#### **4. General procedure for the synthesis of substrates.**

Secondary phosphine oxides were synthesized according to the previous procedure<sup>S2-S5</sup>. Bromoalkynes were synthesized according to the previous procedure<sup>S6</sup>.

## 5. Asymmetric synthesis of alkynyl phosphines.

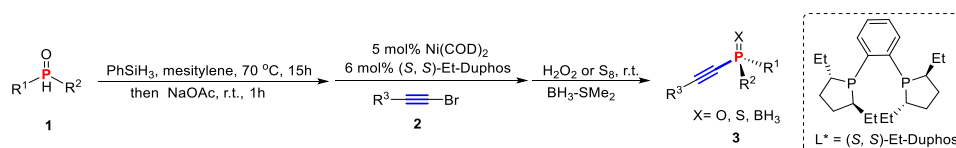

**General procedure:** Under  $\text{N}_2$ , to a 4 mL vial equipped with a stirrer bar were added secondary phosphine oxide (2 equiv., 0.2 mmol),  $\text{PhSiH}_3$  (2 equiv., 0.2 mmol, 24  $\mu\text{L}$ ) and 0.5 mL mesitylene. Then mixture was stirred for 15 hours at  $70^\circ\text{C}$  and then cooled down to r.t.  $\text{NaOAc}$  (2.5 equiv., 0.25 mmol, 20.5 mg) was added and the vial was stirred for 1 hour. To the reaction mixture were added a precooled ( $0^\circ\text{C}$ ) stock solution of  $\text{Ni}(\text{COD})_2$  (5 mol%, 1.4 mg), (*S,S*)-Et-Duphos (6 mol%, 2.2 mg) in mesitylene (0.5 mL) and bromoalkynes (1 equiv., 0.1 mmol). The reaction was stirred for 72-96 hours at  $0^\circ\text{C}$  until the disappearance of bromoalkynes indicated by TLC. The reaction was quenched with  $\text{H}_2\text{O}_2$  (0.2 mL, 30% aqueous solution) or  $\text{S}_8$  (16 mg, 0.5 mmol) or  $\text{BH}_3\text{-SMe}_2$  (0.2 mmol), stirred for additional 3 hours (for 3  $\text{H}_2\text{O}_2$ ) or 6 hours (for  $\text{S}_8$ ) at room temperature or 1 hour at  $0^\circ\text{C}$  (for  $\text{BH}_3\text{-SMe}_2$ ). The reaction mixture was separated directly by preparative thin-layer chromatography to afford the corresponding product **3**.

**Racemic 3** were synthesized according to the following procedure: Under  $\text{N}_2$ , to a 4 mL vial equipped with a stirrer bar were added secondary phosphine oxide (1 equiv., 0.1 mmol),  $\text{PhSiH}_3$  (1 equiv., 0.1 mmol, 12  $\mu\text{L}$ ) and 1 mL mesitylene. Then vial was stirred for 15 hours at  $70^\circ\text{C}$  and then cooled down to r.t.  $\text{NaOAc}$  (2.5 equiv., 0.25 mmol, 20.5 mg),  $\text{Ni}(\text{COD})_2$  (5 mol%, 1.4 mg), DPPP (6 mol%, 2.7 mg), and bromoalkynes (1 equiv., 0.1 mmol) were added to the reaction mixture which was then stirred for 24 hours at r.t. until the disappearance of bromoalkynes indicated by TLC. The reaction was quenched with  $\text{H}_2\text{O}_2$  (0.2 mL, 30% aqueous solution) or  $\text{S}_8$  (16 mg, 0.5 mmol) or  $\text{BH}_3\text{-SMe}_2$  (0.2 mmol), stirred for additional 3 hours (for 3  $\text{H}_2\text{O}_2$ ) or 6 hours (for  $\text{S}_8$ ) at room temperature  $\text{BH}_3\text{-SMe}_2$  (0.2 mmol). The reaction mixture was separated directly by preparative thin-layer chromatography to afford the corresponding racemic product.

## 6. Synthetic applications.

### 6.1 Gram-scale reaction.

Under N<sub>2</sub>, to a 100 mL flask equipped with a stirrer bar were added secondary phosphine oxides **1n** (1 equiv., 5 mmol, 970 mg), PhSiH<sub>3</sub> (1 equiv., 5 mmol, 600  $\mu$ L) and 25 mL mesitylene. Then flask was stirred for 24 hours at 70 °C and then cooled down to r.t. followed by the addition of NaOAc (1.5 equiv., 7.5 mmol, 615 mg). The reaction mixture was stirred for 1 hour and then cooled down to 0 °C. To the reaction mixture were added a precooled (°C) stock solution of Ni(COD)<sub>2</sub> (5 mol%, 70 mg), (*S,S*)-Et-Duphos (6 mol%, 110 mg) in mesitylene (0.5 mL) and bromoalkynes **2a** (1 equiv., 5 mmol). The reaction was stirred for 96 hours at 0 °C until the disappearance of bromoalkynes indicated by TLC. The reaction was quenched with S<sub>8</sub> (800 mg, 75 mmol), stirred for additional 12 hours at room temperature. The reaction mixture was separated directly by preparative thin-layer chromatography to afford the corresponding product **3na** (842 mg, 54% yield, 87% ee).

### 6.2 1,2-Addition.

The alkynyl phosphine oxide **3na-O** (0.2 mmol, 59 mg), H<sub>2</sub>O (1 mmol, 18 mg) and PdCl<sub>2</sub> (0.02 mmol, 3.5 mg) were dissolved in 1,4-dioxane (2 mL) in a 4 mL vial and stirred at 80 °C for 24 h. The resulting mixture was concentrated under vacuum and the crude product was purified by silica gel chromatography with petroleum ether and ethyl acetate as the eluent to afford the corresponding product **4** (45.9 mg, 73% yield, and 84% ee).

### 6.3 Radical addition/cyclization.

Under N<sub>2</sub>, to a 10 mL flask equipped with a stirrer bar was added alkynyl phosphine oxide **3ba** (0.2 mmol, 56 mg), Ph<sub>2</sub>P(O)H (0.6 mmol, 122 mg), K<sub>2</sub>S<sub>2</sub>O<sub>8</sub> (1 mmol, 270 mg) and 5 mL CH<sub>3</sub>CN. The reaction mixture was stirred at 90 °C for 24 h. The mixture was cooled down to room temperature and subjected to flash chromatography (petroleum ether/ethyl acetate) to afford the corresponding product **5** (56.0 mg, 58% yield, 86% ee, and 3:1 dr).

### 6.4 Synthesis of *P*-stereogenic phosphepines.

Under N<sub>2</sub>, to a mixture of alkynyl phosphine oxide **3wp** (2 mmol, 876 mg) and Na<sub>2</sub>HPO<sub>4</sub> (4 mmol, 568 mg) in MeCN (20 mL) was added ICl (6 mmol, 972 mg) dropwise. The reaction was stirred at room temperature for 1 h, and was then quenched by Na<sub>2</sub>S<sub>2</sub>O<sub>3</sub> (10 % aq., 10 mL), diluted with ethyl acetate (10 mL). The organic phase was sequentially washed with water, brine, dried with anhydrous MgSO<sub>4</sub> and filtered. The filtration was concentrated under reduced pressure to give the crude product which was used directly without further purification. To the crude product, (4-methoxyphenyl) boronic acid (4 mmol, 608 mg) and K<sub>2</sub>CO<sub>3</sub> (4 mmol, 553 mg) in degassed solvents (DMF/H<sub>2</sub>O= 9 mL/1 mL) was added Pd(PPh<sub>3</sub>)<sub>4</sub> (0.2 mmol, 115 mg). The reaction mixture was heated at 90 °C under nitrogen for 30 h. The solution was cooled to room temperature and was added saturated aqueous NH<sub>4</sub>Cl (10 mL). The mixture was extracted with ethyl acetate (10 mL), the organic phase was washed with water, brine, dried with

anhydrous  $\text{MgSO}_4$  and filtered. The filtration was concentrated under reduced pressure to give a crude product which was purified by column chromatography on silica gel to give the corresponding product **6** with 560 mg, 53% yield, and 64% ee (317 mg, 30% yield, and 99% ee from recrystallization by EA and  $\text{Et}_2\text{O}$ ).

### **6.5 Measurements of photoluminescence (PL) spectra.**

Sample solutions were prepared according to the following procedure: **6** (1.6 mg,  $3 \times 10^{-3}$  mmol) was respectively dissolve in 30 mL 0%, 30%, 60%, and 90% (different water fractions) THF/water mixtures.

### **6.6 Preparation of chiral composite films.**

The composite films were prepared as follows. **6** (10 mg) and PMMA (0.5g) were dissolved in 6 mL  $\text{CHCl}_3$  and cast onto a glass petri dish. The  $\text{CHCl}_3$  was then evaporated under ambient condition and the film with a uniform thickness of approximately 0.3 mm were obtained.



## 7. Spectroscopic data of products.

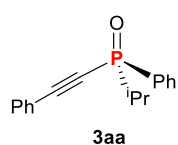

Colorless oil,  $R_f = 0.31$  (PE/EA = 2:1), 80% yield.  $^1\text{H NMR}$  (500 MHz,  $\text{CDCl}_3$ )  $\delta$  7.96 – 7.88 (m, 2H), 7.60 – 7.53 (m, 3H), 7.53 – 7.47 (m, 2H), 7.42 (t,  $J = 7.5$  Hz, 1H), 7.36 (t,  $J = 7.4$  Hz, 2H), 2.29 – 2.17 (m, 1H), 1.27 (dd,  $J = 12.7, 6.2$  Hz, 3H), 1.23 (dd,  $J = 12.3, 6.2$  Hz, 3H).  $^{13}\text{C NMR}$  (126 MHz,  $\text{CDCl}_3$ )  $\delta$  132.38 (d,  $J = 1.4$  Hz), 132.14 (d,  $J = 2.7$  Hz), 130.92 (d,  $J = 9.8$  Hz), 130.67 (d,  $J = 112.2$  Hz), 130.54 (s), 128.54 (s), 128.48 (d,  $J = 13.1$  Hz), 119.90 (d,  $J = 3.7$  Hz), 104.18 (d,  $J = 25.6$  Hz), 81.58 (d,  $J = 152.1$  Hz), 31.48 (d,  $J = 84.3$  Hz), 15.51 (d,  $J = 1.6$  Hz), 15.10 (d,  $J = 2.2$  Hz).  $^{31}\text{P NMR}$  (202 MHz,  $\text{CDCl}_3$ )  $\delta$  25.49. HRMS (ESI) calcd for  $\text{C}_{17}\text{H}_{18}\text{OP}^+$   $[\text{M}+\text{H}]^+$  269.1090, Found 269.1099. The enantiomeric excess was determined by Daicel Chiralcel OJ-H (78% ee), *n*-Hexanes/IPA = 90/10, 1 mL/min,  $\lambda = 254$  nm,  $t$  (major) = 7.71 min,  $t$  (minor) = 6.00 min.  $[\alpha]_{\text{D}}^{20} = -2.5$  ( $c = 0.76$ , acetone).

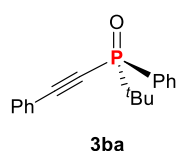

Colorless oil,  $R_f = 0.35$  (PE/EA = 2:1), 72% yield.  $^1\text{H NMR}$  (400 MHz,  $\text{CDCl}_3$ )  $\delta$  7.97 – 7.89 (m, 2H), 7.60 (dt,  $J = 4.4, 1.9$  Hz, 2H), 7.58 – 7.54 (m, 1H), 7.53 – 7.47 (m, 2H), 7.46 (dd,  $J = 6.9, 4.6$  Hz, 1H), 7.42 – 7.36 (m, 2H), 1.25 (d,  $J = 16.8$  Hz, 9H).  $^{13}\text{C NMR}$  (126 MHz,  $\text{CDCl}_3$ )  $\delta$  132.52 (d,  $J = 1.3$  Hz), 132.13 (d,  $J = 2.7$  Hz), 132.03 (d,  $J = 9.4$  Hz), 130.56 (s), 129.55 (d,  $J = 109.3$  Hz), 128.62 (s), 128.20 (d,  $J = 12.1$  Hz), 120.16 (d,  $J = 3.6$  Hz), 104.41 (d,  $J = 24.3$  Hz), 81.32 (d,  $J = 149.2$  Hz), 34.13 (d,  $J = 83.1$  Hz), 23.91 (s).  $^{31}\text{P NMR}$  (162 MHz,  $\text{CDCl}_3$ )  $\delta$  31.30. HRMS (ESI) calcd for  $\text{C}_{18}\text{H}_{20}\text{OP}^+$   $[\text{M}+\text{H}]^+$  283.1246, Found 283.1259. The enantiomeric excess was determined by Daicel Chiralcel OJ-H (86% ee), *n*-Hexanes/IPA = 90/10, 1 mL/min,  $\lambda = 262$  nm,  $t$  (major) = 6.74 min,  $t$  (minor) = 5.40 min.  $[\alpha]_{\text{D}}^{20} = -22.1$  ( $c = 0.38$ , acetone).

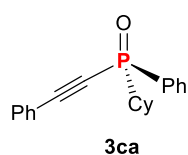

Colorless oil,  $R_f = 0.3$  (PE/EA = 2:1), 76% yield.  $^1\text{H NMR}$  (500 MHz,  $\text{CDCl}_3$ )  $\delta$  7.92 – 7.88 (m, 2H), 7.60 – 7.58 (m, 2H), 7.57 – 7.54 (m, 1H), 7.54 – 7.48 (m, 2H), 7.47 – 7.41 (m, 1H), 7.40 – 7.35 (m, 2H), 2.06 – 1.91 (m, 3H), 1.88 – 1.79 (m, 2H), 1.73 – 1.66 (m, 1H), 1.50 – 1.35 (m, 2H), 1.32 – 1.14 (m, 3H).  $^{13}\text{C NMR}$  (126 MHz,  $\text{CDCl}_3$ )  $\delta$  132.49 (d,  $J = 1.5$  Hz), 132.09 (d,  $J = 2.7$  Hz), 131.03 (d,  $J = 9.9$  Hz), 130.85 (d,  $J = 112.2$  Hz), 130.52 (s), 128.57 (s), 128.49 (d,  $J = 12.7$  Hz), 120.12 (d,  $J = 3.7$  Hz), 104.13 (d,  $J = 25.3$  Hz), 81.95 (d,  $J = 152.4$  Hz), 41.38 (d,  $J = 84.8$  Hz), 26.21 (d,  $J = 4.3$  Hz), 26.09 (d,  $J = 3.9$  Hz), 25.78 (d,  $J = 1.3$  Hz), 25.31 (d,  $J = 2.6$  Hz), 24.90 (d,  $J = 2.5$  Hz).  $^{31}\text{P NMR}$  (202 MHz,  $\text{CDCl}_3$ )  $\delta$  22.58. HRMS (ESI) calcd for  $\text{C}_{20}\text{H}_{22}\text{OP}^+$   $[\text{M}+\text{H}]^+$  309.1403, Found 309.1407. The enantiomeric excess was determined by Daicel Chiralcel IA-H (74% ee), *n*-Hexanes/IPA = 75/25, 1 mL/min,  $\lambda = 250$  nm,  $t$  (major) = 16.76 min,  $t$  (minor) = 12.87 min.  $[\alpha]_{\text{D}}^{20} = 0.4$  ( $c = 1.02$ , acetone).

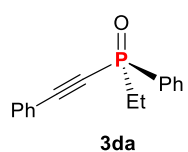

Colorless oil,  $R_f = 0.2$  (PE/EA = 2:1), 81% yield.  $^1\text{H NMR}$  (400 MHz,  $\text{CDCl}_3$ )  $\delta$  7.96 – 7.87 (m, 2H), 7.60 – 7.49 (m, 5H), 7.47 – 7.41 (m, 1H), 7.40 – 7.34 (m, 2H), 2.15 (dq,  $J = 15.1, 7.6$  Hz, 2H), 1.25 (dt,  $J = 20.1, 7.6$  Hz, 3H).  $^{13}\text{C NMR}$  (126 MHz,  $\text{CDCl}_3$ )  $\delta$  132.47 (d,  $J = 1.6$  Hz), 132.22 (d,  $J = 2.7$  Hz), 131.86 (d,  $J = 115.2$  Hz), 130.56 (d,  $J = 3.6$  Hz), 130.46 (s), 128.69 (d,  $J = 12.9$  Hz), 128.58 (s), 120.01 (d,  $J = 3.7$  Hz), 103.88 (d,  $J = 27.5$  Hz), 82.48 (d,  $J = 156.6$  Hz), 27.01 (d,  $J = 85.1$  Hz), 6.10 (d,  $J = 5.2$  Hz).  $^{31}\text{P NMR}$  (162 MHz,  $\text{CDCl}_3$ )  $\delta$  18.93. HRMS (ESI) calcd for  $\text{C}_{16}\text{H}_{16}\text{OP}^+$   $[\text{M}+\text{H}]^+$  255.0933, Found 255.0943. The enantio-

meric excess was determined by Daicel Chiralcel OJ-H (29% ee), *n*-Hexanes/IPA = 90/10, 1 mL/min,  $\lambda$  = 262 nm, *t* (major) = 9.14 min, *t* (minor) = 7.80 min.  $[\alpha]_D^{20}$  = -2.1 (*c* = 1.02, acetone).

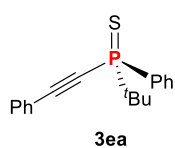

Colorless oil,  $R_f$  = 0.30 (PE/EA = 30:1), 76% yield.  $^1\text{H}$  NMR (400 MHz,  $\text{CDCl}_3$ )  $\delta$  8.07 (dd,  $J$  = 13.4, 7.3 Hz, 2H), 7.61 (d,  $J$  = 7.3 Hz, 2H), 7.57-7.43 (m, 4H), 7.42-7.36 (m, 2H), 1.28 (d,  $J$  = 18.6 Hz, 9H).  $^{13}\text{C}$  NMR (126 MHz,  $\text{CDCl}_3$ )  $\delta$  132.45 (d,  $J$  = 2.1 Hz), 132.35 (d,  $J$  = 10.4 Hz), 131.84 (d,  $J$  = 3.2 Hz), 130.51 (s), 129.66 (d,  $J$  = 83.8 Hz), 128.60 (s), 128.10 (d,  $J$  = 12.6 Hz), 120.42 (d,  $J$  = 4.2 Hz), 105.33 (d,  $J$  = 20.5 Hz), 80.20 (d,  $J$  = 135.8 Hz), 36.69 (d,  $J$  = 59.9 Hz), 24.33 (d,  $J$  = 2.8 Hz).  $^{31}\text{P}$  NMR (162 MHz,  $\text{CDCl}_3$ )  $\delta$  45.70. HRMS (ESI) calcd for  $\text{C}_{18}\text{H}_{20}\text{PS}^+$   $[\text{M}+\text{H}]^+$  299.1018, Found 299.1025. The enantiomeric excess was determined by Daicel Chiralcel AD-H (86% ee), *n*-Hexanes/IPA = 90/10, 1 mL/min,  $\lambda$  = 254 nm, *t* (major) = 6.88 min, *t* (minor) = 5.44 min.  $[\alpha]_D^{20}$  = -16.4 (*c* = 1.24, acetone).

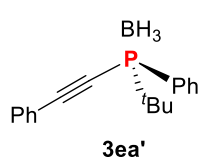

Colorless oil,  $R_f$  = 0.30 (PE/EA = 10:1), 68% yield.  $^1\text{H}$  NMR (500 MHz,  $\text{CDCl}_3$ )  $\delta$  7.95 – 7.86 (m, 2H), 7.62 – 7.58 (m, 2H), 7.53 (dd,  $J$  = 8.1, 2.4 Hz, 1H), 7.51 – 7.46 (m, 2H), 7.46 – 7.42 (m, 1H), 7.41 – 7.37 (m, 2H), 1.23 (d,  $J$  = 15.5 Hz, 9H).  $^{13}\text{C}$  NMR (126 MHz,  $\text{CDCl}_3$ )  $\delta$  133.34 (d,  $J$  = 9.9 Hz), 132.41 (d,  $J$  = 1.5 Hz), 131.56 (d,  $J$  = 2.6 Hz), 130.29 (s), 128.58 (s), 128.39 (d,  $J$  = 10.6 Hz), 125.98 (d,  $J$  = 57.0 Hz), 120.81 (d,  $J$  = 3.0 Hz), 108.05 (d,  $J$  = 12.9 Hz), 77.85 (d,  $J$  = 99.9 Hz), 31.36 (d,  $J$  = 35.3 Hz), 25.27 (d,  $J$  = 3.5 Hz).  $^{31}\text{P}$  NMR (202 MHz,  $\text{CDCl}_3$ )  $\delta$  25.41 (dd,  $J$  = 40.4, 17.2 Hz). HRMS (ESI) calcd for  $\text{C}_{18}\text{H}_{22}\text{BNaP}^+$   $[\text{M}+\text{Na}]^+$  303.1444, Found 303.1459. The enantiomeric excess was determined by Daicel Chiralcel IA-H (84% ee), *n*-Hexanes/IPA = 90/10, 1 mL/min,  $\lambda$  = 252 nm, *t* (major) = 5.64 min, *t* (minor) = 4.39 min.  $[\alpha]_D^{20}$  = 67.5 (*c* = 1.20, acetone).

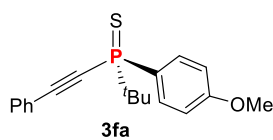

Colorless oil,  $R_f$  = 0.30 (PE/EA = 10:1), 78% yield.  $^1\text{H}$  NMR (500 MHz,  $\text{CDCl}_3$ )  $\delta$  7.97 (ddd,  $J$  = 9.5, 6.8, 2.3 Hz, 2H), 7.61 – 7.58 (m, 2H), 7.47 – 7.42 (m, 1H), 7.41 – 7.36 (m, 2H), 7.02 – 6.97 (m, 2H), 3.86 (s, 3H), 1.27 (d,  $J$  = 18.6 Hz, 9H).  $^{13}\text{C}$  NMR (126 MHz,  $\text{CDCl}_3$ )  $\delta$  162.57 (d,  $J$  = 3.2 Hz), 134.17 (d,  $J$  = 12.1 Hz), 132.41 (d,  $J$  = 1.7 Hz), 130.45 (s), 128.59 (s), 120.48 (d,  $J$  = 93.8 Hz), 120.47 (d,  $J$  = 4.1 Hz), 113.67 (d,  $J$  = 13.8 Hz), 104.93 (d,  $J$  = 20.5 Hz), 80.52 (d,  $J$  = 134.8 Hz), 55.46 (s), 36.82 (d,  $J$  = 61.3 Hz), 24.32 (d,  $J$  = 2.8 Hz).  $^{31}\text{P}$  NMR (202 MHz,  $\text{CDCl}_3$ )  $\delta$  44.88. HRMS (ESI) calcd for  $\text{C}_{19}\text{H}_{22}\text{OPS}^+$   $[\text{M}+\text{H}]^+$  329.1123, Found 329.1127. The enantiomeric excess was determined by Daicel Chiralcel AD-H (76% ee), *n*-Hexanes/IPA = 90/10, 1 mL/min,  $\lambda$  = 254 nm, *t* (major) = 14.92 min, *t* (minor) = 8.47 min.  $[\alpha]_D^{20}$  = +3.4 (*c* = 0.19, acetone).

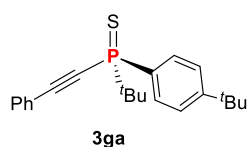

Colorless oil,  $R_f$  = 0.30 (PE/EA = 30:1), 73% yield.  $^1\text{H}$  NMR (500 MHz,  $\text{CDCl}_3$ )  $\delta$  8.01 – 7.95 (m, 2H), 7.61 – 7.58 (m, 2H), 7.50 (dd,  $J$  = 8.5, 2.9 Hz, 2H), 7.46 – 7.42 (m, 1H), 7.38 (dd,  $J$  = 8.0, 6.7 Hz, 2H), 1.34 (s, 9H), 1.28 (d,  $J$  = 18.6 Hz, 9H).  $^{13}\text{C}$  NMR (126 MHz,  $\text{CDCl}_3$ )  $\delta$  155.34 (d,  $J$  = 3.3 Hz), 132.41 (d,  $J$  = 1.7 Hz), 132.26 (d,  $J$  = 10.8 Hz), 130.45 (s), 128.59 (s), 126.31 (d,  $J$  = 89.8 Hz), 125.17 (d,  $J$  = 12.9 Hz), 120.49 (d,  $J$  = 3.8 Hz), 104.99 (d,  $J$  = 20.7 Hz), 80.49 (d,  $J$  = 134.6 Hz), 36.69 (d,  $J$  = 60.1 Hz), 34.98 (s), 31.17 (s), 24.37 (d,  $J$  = 3.0 Hz).  $^{31}\text{P}$  NMR (202 MHz,  $\text{CDCl}_3$ )  $\delta$  45.28. HRMS (ESI) calcd for  $\text{C}_{22}\text{H}_{28}\text{PS}^+$   $[\text{M}+\text{H}]^+$  355.1644, Found 355.1646. The enantiomeric excess was determined by Daicel

Chiralcel IB-H (90% ee), *n*-Hexanes/IPA = 90/10, 1 mL/min,  $\lambda = 254$  nm,  $t$  (major) = 7.29 min,  $t$  (minor) = 4.48 min.  $[\alpha]_{\text{D}}^{20} = +3.4$  ( $c = 4.80$ , acetone).

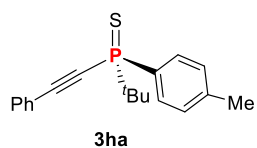

Colorless oil,  $R_f = 0.35$  (PE/EA = 30:1), 72% yield.  $^1\text{H NMR}$  (500 MHz,  $\text{CDCl}_3$ )  $\delta$  7.94 (dd,  $J = 13.3, 8.1$  Hz, 2H), 7.62 – 7.59 (m, 2H), 7.47 – 7.43 (m, 1H), 7.39 (dd,  $J = 11.5, 4.4$  Hz, 2H), 7.30 (dd,  $J = 8.0, 2.7$  Hz, 2H), 2.42 (s, 3H), 1.27 (d,  $J = 18.6$  Hz, 9H).  $^{13}\text{C NMR}$  (126 MHz,  $\text{CDCl}_3$ )  $\delta$  142.40 (d,  $J = 3.0$  Hz), 132.43 (d,  $J = 2.0$  Hz), 132.33 (s), 130.43 (s), 128.86 (d,  $J = 13.1$  Hz), 128.58 (s), 126.30 (d,  $J = 89.9$  Hz), 120.52 (d,  $J = 3.7$  Hz), 105.04 (d,  $J = 20.6$  Hz), 80.43 (d,  $J = 134.8$  Hz), 36.68 (d,  $J = 60.4$  Hz), 24.34 (d,  $J = 2.8$  Hz), 21.54 (s).  $^{31}\text{P NMR}$  (202 MHz,  $\text{CDCl}_3$ )  $\delta$  45.46. HRMS (ESI) calcd for  $\text{C}_{19}\text{H}_{22}\text{PS}^+$   $[\text{M}+\text{H}]^+$  313.1174, Found 313.1178. The enantiomeric excess was determined by Daicel Chiralcel OD-H (84% ee), *n*-Hexanes/IPA = 90/10, 1 mL/min,  $\lambda = 254$  nm,  $t$  (major) = 9.89 min,  $t$  (minor) = 5.06 min.  $[\alpha]_{\text{D}}^{20} = -10.2$  ( $c = 0.80$ , acetone).

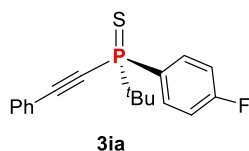

Colorless oil,  $R_f = 0.35$  (PE/EA = 30:1), 68% yield.  $^1\text{H NMR}$  (500 MHz,  $\text{CDCl}_3$ )  $\delta$  8.07 (ddd,  $J = 12.9, 8.6, 5.5$  Hz, 2H), 7.61 (d,  $J = 7.2$  Hz, 2H), 7.47 (t,  $J = 7.5$  Hz, 1H), 7.40 (t,  $J = 7.5$  Hz, 2H), 7.19 (td,  $J = 8.6, 2.0$  Hz, 2H), 1.27 (d,  $J = 18.8$  Hz, 9H).  $^{13}\text{C NMR}$  (126 MHz,  $\text{CDCl}_3$ )  $\delta$  165.14 (dd,  $J = 253.8, 3.6$  Hz), 134.81 (dd,  $J = 12.3, 8.9$  Hz), 132.45 (d,  $J = 1.9$  Hz), 130.63 (s), 128.63 (s), 125.58 (dd,  $J = 90.4, 3.4$  Hz), 120.24 (d,  $J = 3.8$  Hz), 115.42 (dd,  $J = 21.4, 13.9$  Hz), 105.56 (d,  $J = 21.1$  Hz), 79.99 (d,  $J = 136.6$  Hz), 36.79 (d,  $J = 60.9$  Hz), 24.28 (d,  $J = 2.8$  Hz).  $^{31}\text{P NMR}$  (202 MHz,  $\text{CDCl}_3$ )  $\delta$  44.70.  $^{19}\text{F NMR}$  (471 MHz,  $\text{CDCl}_3$ )  $\delta$  -107.33. HRMS (ESI) calcd for  $\text{C}_{18}\text{H}_{19}\text{FPS}^+$   $[\text{M}+\text{H}]^+$  317.0924, Found 317.0938. The enantiomeric excess was determined by Daicel Chiralcel AD-H (90% ee), *n*-Hexanes/IPA = 90/10, 1 mL/min,  $\lambda = 254$  nm,  $t$  (major) = 7.07 min,  $t$  (minor) = 5.47 min.  $[\alpha]_{\text{D}}^{20} = -20.2$  ( $c = 0.59$ , acetone).

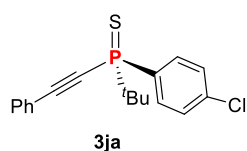

Colorless oil,  $R_f = 0.25$  (PE/EA = 30:1), 64% yield.  $^1\text{H NMR}$  (500 MHz,  $\text{CDCl}_3$ )  $\delta$  8.00 (dd,  $J = 12.8, 8.4$  Hz, 2H), 7.60 (d,  $J = 7.3$  Hz, 2H), 7.50-7.45 (m, 3H), 7.40 (t,  $J = 7.5$  Hz, 2H), 1.27 (d,  $J = 18.8$  Hz, 9H).  $^{13}\text{C NMR}$  (126 MHz,  $\text{CDCl}_3$ )  $\delta$  138.57 (d,  $J = 3.6$  Hz), 133.73 (d,  $J = 11.8$  Hz), 132.47 (d,  $J = 1.7$  Hz), 130.66 (s), 128.64 (s), 128.41 (d,  $J = 13.4$  Hz), 128.39 (d,  $J = 88.4$  Hz), 120.18 (d,  $J = 4.1$  Hz), 105.71 (d,  $J = 21.2$  Hz), 79.79 (d,  $J = 136.8$  Hz), 36.81 (d,  $J = 60.6$  Hz), 24.27 (d,  $J = 2.8$  Hz).  $^{31}\text{P NMR}$  (202 MHz,  $\text{CDCl}_3$ )  $\delta$  44.88. HRMS (ESI) calcd for  $\text{C}_{18}\text{H}_{19}\text{ClPS}^+$   $[\text{M}+\text{H}]^+$  333.0628, Found 333.0631. The enantiomeric excess was determined by Daicel Chiralcel AD-H (83% ee), *n*-Hexanes/IPA = 90/10, 1 mL/min,  $\lambda = 254$  nm,  $t$  (major) = 8.18 min,  $t$  (minor) = 5.61 min.  $[\alpha]_{\text{D}}^{20} = -16.2$  ( $c = 0.63$ , acetone).

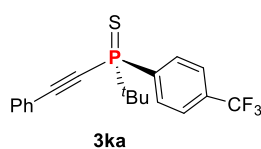

Colorless oil,  $R_f = 0.35$  (PE/EA = 30:1), 63% yield.  $^1\text{H NMR}$  (500 MHz,  $\text{CDCl}_3$ )  $\delta$  8.21 (dd,  $J = 12.8, 8.1$  Hz, 2H), 7.76 (d,  $J = 6.5$  Hz, 2H), 7.62 (d,  $J = 8.3$  Hz, 2H), 7.48 (t,  $J = 7.5$  Hz, 1H), 7.41 (t,  $J = 7.5$  Hz, 2H), 1.29 (d,  $J = 18.9$  Hz, 9H).  $^{13}\text{C NMR}$  (126 MHz,  $\text{CDCl}_3$ )  $\delta$  134.48 (d,  $J = 84.8$  Hz), 133.59 (qd,  $J = 32.9, 3.3$  Hz), 132.87 (d,  $J = 11.0$  Hz), 132.49 (d,  $J = 2.1$  Hz), 130.82 (s), 128.69 (s), 125.10 – 124.81 (m), 123.63 (q,  $J = 273.0$  Hz), 119.99 (d,  $J = 4.1$  Hz), 106.18 (d,  $J = 21.5$  Hz), 79.45 (d,  $J = 138.0$  Hz), 36.86 (d,  $J = 60.0$  Hz), 24.25 (d,  $J = 2.7$  Hz).  $^{31}\text{P NMR}$  (202 MHz,  $\text{CDCl}_3$ )  $\delta$  44.96.  $^{19}\text{F NMR}$  (471 MHz,  $\text{CDCl}_3$ )  $\delta$  -63.07. HRMS (ESI) calcd for  $\text{C}_{19}\text{H}_{19}\text{F}_3\text{PS}^+$   $[\text{M}+\text{H}]^+$  367.0892, Found 367.0900. The

enantiomeric excess was determined by Daicel Chiralcel AD-H (84% ee), *n*-Hexanes/IPA = 90/10, 1 mL/min,  $\lambda = 254$  nm,  $t$  (major) = 6.10 min,  $t$  (minor) = 4.53 min.  $[\alpha]_{\text{D}}^{20} = -22.9$  ( $c = 0.70$ , acetone).

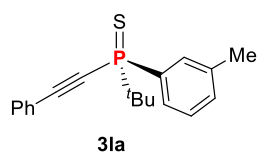

Colorless oil,  $R_f = 0.3$  (PE/EA = 40:1), 64% yield.  $^1\text{H NMR}$  (500 MHz,  $\text{CDCl}_3$ )  $\delta$  7.85 (dd,  $J = 19.2, 10.9$  Hz, 2H), 7.61 (d,  $J = 7.1$  Hz, 2H), 7.46 (t,  $J = 7.4$  Hz, 1H), 7.43 – 7.31 (m, 4H), 2.43 (s, 3H), 1.27 (d,  $J = 18.6$  Hz, 9H).  $^{13}\text{C NMR}$  (126 MHz,  $\text{CDCl}_3$ )  $\delta$  138.00 (d,  $J = 13.0$  Hz), 132.75 (d,  $J = 11.5$  Hz), 132.68 (d,  $J = 3.4$  Hz), 132.44 (d,  $J = 1.6$  Hz), 130.44 (s), 129.50 (d,  $J = 10.2$  Hz), 129.44 (d,  $J = 87.2$  Hz), 128.58 (s), 127.90 (d,  $J = 13.4$  Hz), 120.52 (d,  $J = 3.9$  Hz), 105.21 (d,  $J = 20.9$  Hz), 80.36 (d,  $J = 135.2$  Hz), 36.66 (d,  $J = 60.1$  Hz), 24.37 (d,  $J = 2.8$  Hz), 21.54 (s).  $^{31}\text{P NMR}$  (202 MHz,  $\text{CDCl}_3$ )  $\delta$  45.80. HRMS (ESI) calcd for  $\text{C}_{19}\text{H}_{22}\text{PS}^+$   $[\text{M}+\text{H}]^+$  313.1174, Found 313.1178. The enantiomeric excess was determined by Daicel Chiralcel OJ-H (75% ee), *n*-Hexanes/IPA = 80/20, 1 mL/min,  $\lambda = 254$  nm,  $t$  (major) = 9.84 min,  $t$  (minor) = 4.67 min.  $[\alpha]_{\text{D}}^{20} = -14.5$  ( $c = 1.00$ , acetone).

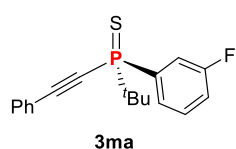

Colorless oil,  $R_f = 0.25$  (PE/EA = 30:1), 70% yield.  $^1\text{H NMR}$  (500 MHz,  $\text{CDCl}_3$ )  $\delta$  7.85 (dd,  $J = 12.8, 7.7$  Hz, 1H), 7.82 – 7.75 (m, 1H), 7.63 – 7.57 (m, 2H), 7.52 – 7.43 (m, 2H), 7.39 (t,  $J = 7.4$  Hz, 2H), 7.27 – 7.20 (m, 1H), 1.32 – 1.24 (m, 9H).  $^{13}\text{C NMR}$  (126 MHz,  $\text{CDCl}_3$ )  $\delta$  162.22 (dd,  $J = 249.9, 17.5$  Hz), 132.71 (dd,  $J = 86.2, 5.7$  Hz), 132.46 (d,  $J = 1.7$  Hz), 130.75 (s), 129.96 (dd,  $J = 14.6, 7.5$  Hz), 128.07 (dd,  $J = 9.9, 2.9$  Hz), 120.08 (d,  $J = 3.8$  Hz), 119.28 (dd,  $J = 23.3, 12.0$  Hz), 119.03 (dd,  $J = 21.3, 2.6$  Hz), 105.81 (d,  $J = 21.3$  Hz), 79.67 (d,  $J = 137.6$  Hz), 36.85 (d,  $J = 59.9$  Hz), 24.30 (d,  $J = 2.7$  Hz).  $^{31}\text{P NMR}$  (202 MHz,  $\text{CDCl}_3$ )  $\delta$  46.14.  $^{19}\text{F NMR}$  (471 MHz,  $\text{CDCl}_3$ )  $\delta$  -111.37. HRMS (ESI) calcd for  $\text{C}_{18}\text{H}_{22}\text{PS}^+$   $[\text{M}+\text{H}]^+$  317.0924, Found 317.0928. The enantiomeric excess was determined by Daicel Chiralcel OD-H (82% ee), *n*-Hexanes/IPA = 90/10, 1 mL/min,  $\lambda = 254$  nm,  $t$  (major) = 8.40 min,  $t$  (minor) = 6.36 min.  $[\alpha]_{\text{D}}^{20} = -10.73$  ( $c = 1.24$ , acetone).

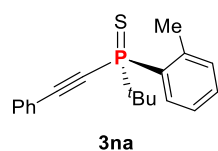

Colorless oil,  $R_f = 0.30$  (PE/EA = 30:1), 68% yield.  $^1\text{H NMR}$  (500 MHz,  $\text{CDCl}_3$ )  $\delta$  8.21 (dd,  $J = 15.6, 7.6$  Hz, 1H), 7.62 – 7.57 (m, 2H), 7.47 – 7.42 (m, 1H), 7.40 (q,  $J = 7.4$  Hz, 3H), 7.30 (t,  $J = 7.6$  Hz, 1H), 7.27 – 7.23 (m, 1H), 2.89 (s, 3H), 1.32 (d,  $J = 18.6$  Hz, 9H).  $^{13}\text{C NMR}$  (126 MHz,  $\text{CDCl}_3$ )  $\delta$  142.79 (d,  $J = 10.8$  Hz), 134.77 (d,  $J = 11.8$  Hz), 132.85 (d,  $J = 11.8$  Hz), 132.21 (d,  $J = 1.7$  Hz), 131.71 (d,  $J = 2.8$  Hz), 130.36 (s), 128.58 (s), 126.27 (d,  $J = 83.3$  Hz), 125.36 (d,  $J = 12.5$  Hz), 120.74 (d,  $J = 3.7$  Hz), 106.17 (d,  $J = 20.8$  Hz), 81.94 (d,  $J = 136.6$  Hz), 38.64 (d,  $J = 58.9$  Hz), 24.75 (d,  $J = 3.2$  Hz), 23.20 (d,  $J = 2.8$  Hz).  $^{31}\text{P NMR}$  (202 MHz,  $\text{CDCl}_3$ )  $\delta$  46.72. HRMS (ESI) calcd for  $\text{C}_{19}\text{H}_{22}\text{PS}^+$   $[\text{M}+\text{H}]^+$  313.1174, Found 313.1181. The enantiomeric excess was determined by Daicel Chiralcel AD-H (90% ee), *n*-Hexanes/IPA = 90/10, 1 mL/min,  $\lambda = 254$  nm,  $t$  (major) = 7.60 min,  $t$  (minor) = 5.56 min.  $[\alpha]_{\text{D}}^{20} = -31.4$  ( $c = 0.61$ , acetone).

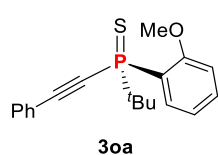

Colorless oil,  $R_f = 0.30$  (PE/EA = 10:1), 73% yield.  $^1\text{H NMR}$  (500 MHz,  $\text{CDCl}_3$ )  $\delta$  8.27 (ddd,  $J = 16.7, 7.8, 1.7$  Hz, 1H), 7.59 – 7.55 (m, 2H), 7.51 (ddd,  $J = 8.9, 2.8, 1.4$  Hz, 1H), 7.44 – 7.39 (m, 1H), 7.39 – 7.34 (m, 2H), 7.10 (td,  $J = 8.1, 1.4$  Hz, 1H), 6.95 (dd,  $J = 8.1, 5.7$  Hz, 1H), 3.87 (s, 3H), 1.31 (d,  $J = 19.2$  Hz, 9H).  $^{13}\text{C NMR}$  (126 MHz,  $\text{CDCl}_3$ )  $\delta$  160.68 (d,  $J = 1.8$  Hz), 136.40 (d,  $J = 10.8$  Hz), 134.03 (d,  $J = 2.1$  Hz), 132.20 (d,  $J = 1.7$  Hz), 130.02 (s), 128.50 (s), 121.22 (d,  $J = 4.3$  Hz), 120.74 (d,  $J = 13.4$  Hz), 117.28 (d,

$J = 84.5$  Hz), 111.87 (d,  $J = 6.4$  Hz), 104.21 (d,  $J = 23.0$  Hz), 81.40 (d,  $J = 142.7$  Hz), 55.47 (s), 38.08 (d,  $J = 61.6$  Hz), 24.98 (d,  $J = 3.6$  Hz).  $^{31}\text{P}$  NMR (202 MHz,  $\text{CDCl}_3$ )  $\delta$  41.45. HRMS (ESI) calcd for  $\text{C}_{19}\text{H}_{22}\text{OPS}^+ [\text{M}+\text{H}]^+$  329.1123, Found 329.1128. The enantiomeric excess was determined by Daicel Chiralcel IB-H (76% ee), *n*-Hexanes/IPA = 90/10, 1 mL/min,  $\lambda = 254$  nm,  $t$  (major) = 6.97 min,  $t$  (minor) = 5.93 min.  $[\alpha]_{\text{D}}^{20} = -31.4$  ( $c = 0.61$ , acetone).

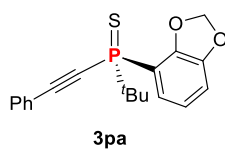

Colorless oil,  $R_f = 0.15$  (PE/EA = 10:1), 56% yield.  $^1\text{H}$  NMR (500 MHz,  $\text{CDCl}_3$ )  $\delta$  7.63-7.59 (m, 3H), 7.50 (dd,  $J = 12.6, 1.5$  Hz, 1H), 7.48 – 7.43 (m, 1H), 7.42 – 7.37 (m, 2H), 6.92 (dd,  $J = 8.0, 2.5$  Hz, 1H), 6.05 (s, 2H), 1.27 (d,  $J = 18.7$  Hz, 9H).  $^{13}\text{C}$  NMR (126 MHz,  $\text{CDCl}_3$ )  $\delta$  150.90 (d,  $J = 2.7$  Hz), 147.67 (d,  $J = 19.4$  Hz), 132.44 (d,  $J = 1.7$  Hz), 130.49 (s), 128.59 (s), 127.87 (d,  $J = 12.0$  Hz), 122.64 (d,  $J = 91.7$  Hz), 120.39 (d,  $J = 4.1$  Hz), 112.04 (d,  $J = 14.1$  Hz), 108.17 (d,  $J = 16.0$  Hz), 105.18 (d,  $J = 21.1$  Hz), 101.78 (s), 80.32 (d,  $J = 135.8$  Hz), 36.93 (d,  $J = 60.9$  Hz), 24.39 (d,  $J = 2.8$  Hz).  $^{31}\text{P}$  NMR (202 MHz,  $\text{CDCl}_3$ )  $\delta$  45.96. HRMS (ESI) calcd for  $\text{C}_{19}\text{H}_{20}\text{O}_2\text{PS}^+ [\text{M}+\text{H}]^+$  343.0916, Found 343.0919. The enantiomeric excess was determined by Daicel Chiralcel AD-H (86% ee), *n*-Hexanes/IPA = 90/10, 1 mL/min,  $\lambda = 254$  nm,  $t$  (major) = 6.88 min,  $t$  (minor) = 5.44 min.  $[\alpha]_{\text{D}}^{20} = -1.9$  ( $c = 0.30$ , acetone).

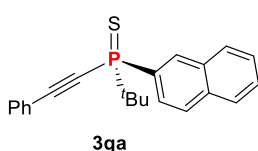

White solid,  $R_f = 0.30$  (PE/EA = 20:1), 60% yield.  $^1\text{H}$  NMR (500 MHz,  $\text{CDCl}_3$ )  $\delta$  8.63 (d,  $J = 15.8$  Hz, 1H), 8.09 – 8.02 (m, 1H), 7.97 (d,  $J = 7.9$  Hz, 1H), 7.92 (dd,  $J = 8.5, 3.1$  Hz, 1H), 7.88 (d,  $J = 7.9$  Hz, 1H), 7.65 – 7.61 (m, 2H), 7.61 – 7.53 (m, 2H), 7.45 (t,  $J = 7.4$  Hz, 1H), 7.39 (t,  $J = 7.4$  Hz, 2H), 1.31 (d,  $J = 18.7$  Hz, 9H).  $^{13}\text{C}$  NMR (126 MHz,  $\text{CDCl}_3$ )  $\delta$  134.73 (d,  $J = 2.5$  Hz), 134.29 (d,  $J = 10.8$  Hz), 132.50 (d,  $J = 1.7$  Hz), 132.27 (d,  $J = 14.1$  Hz), 130.60 (s), 129.09 (s), 128.67 (s), 128.33 (s), 127.80 (s), 127.70 (s), 127.33 (d,  $J = 11.0$  Hz), 127.00 (s), 126.82 (d,  $J = 87.4$  Hz), 120.42 (d,  $J = 4.2$  Hz), 105.55 (d,  $J = 21.0$  Hz), 80.35 (d,  $J = 135.4$  Hz), 37.08 (d,  $J = 60.4$  Hz), 24.47 (d,  $J = 2.7$  Hz).  $^{31}\text{P}$  NMR (202 MHz,  $\text{CDCl}_3$ )  $\delta$  45.80. HRMS (ESI) calcd for  $\text{C}_{22}\text{H}_{22}\text{PS}^+ [\text{M}+\text{H}]^+$  349.1174, Found 349.1182. The enantiomeric excess was determined by Daicel Chiralcel AD-H (80% ee), *n*-Hexanes/IPA = 90/10, 1 mL/min,  $\lambda = 254$  nm,  $t$  (major) = 13.02 min,  $t$  (minor) = 7.53 min.  $[\alpha]_{\text{D}}^{20} = -0.7$  ( $c = 0.30$ , acetone).

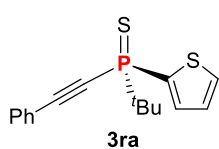

Colorless oil,  $R_f = 0.20$  (PE/EA = 30:1), 41% yield.  $^1\text{H}$  NMR (500 MHz,  $\text{CDCl}_3$ )  $\delta$  7.77 – 7.70 (m, 2H), 7.59 (d,  $J = 7.3$  Hz, 2H), 7.45 (t,  $J = 7.4$  Hz, 1H), 7.39 (t,  $J = 7.5$  Hz, 2H), 7.22 – 7.18 (m, 1H), 1.35 (d,  $J = 19.7$  Hz, 9H).  $^{13}\text{C}$  NMR (126 MHz,  $\text{CDCl}_3$ )  $\delta$  136.94 (d,  $J = 10.1$  Hz), 133.94 (s), 132.44 (d,  $J = 1.7$  Hz), 132.37 (d,  $J = 97.2$  Hz), 130.57 (s), 128.58 (s), 128.20 (d,  $J = 14.6$  Hz), 120.24 (d,  $J = 3.9$  Hz), 104.67 (d,  $J = 22.1$  Hz), 80.80 (d,  $J = 138.8$  Hz), 37.16 (d,  $J = 65.0$  Hz), 24.30 (d,  $J = 3.0$  Hz).  $^{31}\text{P}$  NMR (202 MHz,  $\text{CDCl}_3$ )  $\delta$  35.51. HRMS (ESI) calcd for  $\text{C}_{16}\text{H}_{18}\text{PS}_2^+ [\text{M}+\text{H}]^+$  305.0582, Found 305.0592. The enantiomeric excess was determined by Daicel Chiralcel AD-H (72% ee), *n*-Hexanes/IPA = 90/10, 1 mL/min,  $\lambda = 254$  nm,  $t$  (major) = 8.00 min,  $t$  (minor) = 7.42 min.  $[\alpha]_{\text{D}}^{20} = -13.0$  ( $c = 0.75$ , acetone).

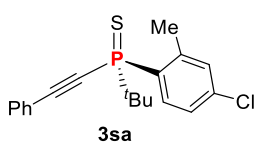

Colorless oil,  $R_f = 0.2$  (PE/EA = 30:1), 63% yield.  $^1\text{H}$  NMR (500 MHz,  $\text{CDCl}_3$ )  $\delta$  8.15 (dd,  $J = 15.1, 8.4$  Hz, 1H), 7.62 – 7.56 (m, 2H), 7.46 (t,  $J = 4.9$  Hz, 1H), 7.40 (t,  $J = 7.4$  Hz, 2H), 7.29 (d,  $J = 8.5$  Hz, 1H), 7.26 (d,  $J = 3.7$  Hz, 1H), 2.87 (s, 3H), 1.31 (d,  $J = 18.8$  Hz, 9H).  $^{13}\text{C}$  NMR (126 MHz,  $\text{CDCl}_3$ )  $\delta$  144.62 (d,  $J = 11.8$  Hz), 137.98 (d,  $J = 3.6$  Hz), 136.24 (d,  $J = 12.8$  Hz), 132.56 (d,  $J = 12.0$  Hz), 132.23 (d,  $J =$

2.2 Hz), 130.55 (s), 128.64 (s), 125.63 (d,  $J = 13.5$  Hz), 125.03 (d,  $J = 84.6$  Hz), 120.47 (d,  $J = 3.8$  Hz), 106.61 (d,  $J = 21.5$  Hz), 81.48 (d,  $J = 137.9$  Hz), 38.75 (d,  $J = 59.3$  Hz), 24.68 (d,  $J = 3.2$  Hz), 23.09 (d,  $J = 2.6$  Hz).  $^{31}\text{P}$  NMR (202 MHz,  $\text{CDCl}_3$ )  $\delta$  46.04. HRMS (ESI) calcd for  $\text{C}_{19}\text{H}_{21}\text{ClPS}^+$   $[\text{M}+\text{H}]^+$  347.0785, Found 347.0790. The enantiomeric excess was determined by Daicel Chiralcel AD-H (90% ee), *n*-Hexanes/IPA = 90/10, 1 mL/min,  $\lambda = 254$  nm,  $t$  (major) = 8.44 min,  $t$  (minor) = 5.50 min.  $[\alpha]_{\text{D}}^{20} = -13.0$  ( $c = 0.75$ , acetone).

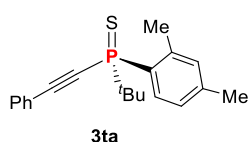

Colorless oil,  $R_f = 0.25$  (PE/EA = 30:1), 58% yield.  $^1\text{H}$  NMR (500 MHz,  $\text{CDCl}_3$ )  $\delta$  8.02 (d,  $J = 16.3$  Hz, 1H), 7.59 (d,  $J = 7.1$  Hz, 2H), 7.44 (t,  $J = 7.4$  Hz, 1H), 7.39 (t,  $J = 7.4$  Hz, 2H), 7.21 (d,  $J = 7.6$  Hz, 1H), 7.17 – 7.10 (m, 1H), 2.83 (s, 3H), 2.36 (s, 3H), 1.32 (d,  $J = 18.6$  Hz, 9H).  $^{13}\text{C}$  NMR (126 MHz,  $\text{CDCl}_3$ )  $\delta$  139.42 (d,  $J = 10.1$  Hz), 135.12 (d,  $J = 12.0$  Hz), 134.88 (d,  $J = 12.8$  Hz), 132.77 (d,  $J = 12.4$  Hz), 132.60 (d,  $J = 3.0$  Hz), 132.16 (d,  $J = 1.7$  Hz), 130.36 (s), 128.61 (s), 125.86 (d,  $J = 82.8$  Hz), 120.79 (d,  $J = 4.0$  Hz), 106.18 (d,  $J = 21.0$  Hz), 82.04 (d,  $J = 136.0$  Hz), 38.57 (d,  $J = 59.1$  Hz), 24.76 (d,  $J = 2.9$  Hz), 22.77 (d,  $J = 2.9$  Hz), 21.18 (s).  $^{31}\text{P}$  NMR (202 MHz,  $\text{CDCl}_3$ )  $\delta$  46.28. HRMS (ESI) calcd for  $\text{C}_{20}\text{H}_{24}\text{PS}^+$   $[\text{M}+\text{H}]^+$  327.1331, Found 327.1349. The enantiomeric excess was determined by Daicel Chiralcel OD-H (92% ee), *n*-Hexanes/IPA = 90/10, 1 mL/min,  $\lambda = 254$  nm,  $t$  (major) = 4.52 min,  $t$  (minor) = 5.10 min.  $[\alpha]_{\text{D}}^{20} = -20.44$  ( $c = 3.05$ , acetone)

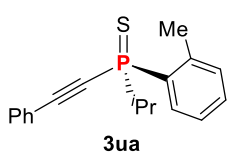

Colorless oil,  $R_f = 0.20$  (PE/EA = 30:1), 68% yield.  $^1\text{H}$  NMR (500 MHz,  $\text{CDCl}_3$ )  $\delta$  8.29 (dd,  $J = 16.7, 7.7$  Hz, 1H), 7.59 – 7.55 (m, 2H), 7.46 – 7.40 (m, 2H), 7.36 (dt,  $J = 15.9, 7.7$  Hz, 3H), 7.29 – 7.25 (m, 1H), 2.80 (s, 3H), 2.66 (dq,  $J = 13.9, 6.9$  Hz, 1H), 1.32 (dd,  $J = 20.7, 6.9$  Hz, 3H), 1.21 (dd,  $J = 21.3, 6.9$  Hz, 3H).  $^{13}\text{C}$  NMR (126 MHz,  $\text{CDCl}_3$ )  $\delta$  140.31 (d,  $J = 10.2$  Hz), 133.76 (d,  $J = 12.1$  Hz), 132.30 (d,  $J = 1.7$  Hz), 132.13 (d,  $J = 11.4$  Hz), 131.89 (d,  $J = 2.8$  Hz), 130.41 (s), 128.54 (s), 128.34 (d,  $J = 88.0$  Hz), 125.96 (d,  $J = 13.0$  Hz), 120.48 (d,  $J = 4.1$  Hz), 105.57 (d,  $J = 22.0$  Hz), 80.80 (d,  $J = 136.8$  Hz), 32.49 (d,  $J = 62.5$  Hz), 21.84 (d,  $J = 3.7$  Hz), 17.06 (d,  $J = 2.3$  Hz).  $^{31}\text{P}$  NMR (202 MHz,  $\text{CDCl}_3$ )  $\delta$  37.80. HRMS (ESI) calcd for  $\text{C}_{18}\text{H}_{20}\text{PS}^+$   $[\text{M}+\text{H}]^+$  299.1018, Found 299.1028. The enantiomeric excess was determined by Daicel Chiralcel OD-H (88% ee), *n*-Hexanes/IPA = 90/10, 1 mL/min,  $\lambda = 254$  nm,  $t$  (major) = 5.44 min,  $t$  (minor) = 6.78 min.  $[\alpha]_{\text{D}}^{20} = 7.18$  ( $c = 1.65$ , acetone)

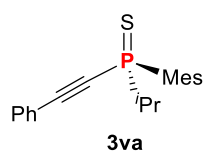

Colorless oil,  $R_f = 0.20$  (PE/EA = 30:1), 50% yield.  $^1\text{H}$  NMR (500 MHz,  $\text{CDCl}_3$ )  $\delta$  7.56 – 7.52 (m, 2H), 7.45 – 7.41 (m, 1H), 7.37 (m, 2H), 6.90 (d,  $J = 4.2$  Hz, 2H), 2.87 – 2.82 (m, 1H), 2.82 (s, 6H), 2.28 (s, 3H), 1.52 (dd,  $J = 21.3, 6.8$  Hz, 3H), 1.20 (dd,  $J = 20.7, 6.9$  Hz, 3H).  $^{13}\text{C}$  NMR (126 MHz,  $\text{CDCl}_3$ )  $\delta$  141.27 (d,  $J = 10.9$  Hz), 140.89 (d,  $J = 3.0$  Hz), 132.00 (s), 131.98 (s), 131.53 (d,  $J = 11.9$  Hz), 126.19 (d,  $J = 91.3$  Hz), 120.94 (d,  $J = 3.8$  Hz), 105.21 (d,  $J = 21.2$  Hz), 82.47 (d,  $J = 132.6$  Hz), 34.77 (d,  $J = 60.7$  Hz), 24.16 (d,  $J = 5.2$  Hz), 20.89 (d,  $J = 1.3$  Hz), 17.23 (d,  $J = 1.7$  Hz), 16.06 (s).  $^{31}\text{P}$  NMR (202 MHz,  $\text{CDCl}_3$ )  $\delta$  34.88. HRMS (ESI) calcd for  $\text{C}_{20}\text{H}_{24}\text{PS}^+$   $[\text{M}+\text{H}]^+$  327.1331, Found 327.1349. The enantiomeric excess was determined by Daicel Chiralcel AD-H (80% ee), *n*-Hexanes/IPA = 90/10, 1 mL/min,  $\lambda = 254$  nm,  $t$  (major) = 9.50 min,  $t$  (minor) = 8.41 min.  $[\alpha]_{\text{D}}^{20} = 2.23$  ( $c = 0.61$ , acetone)

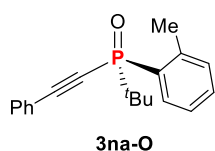

Colorless oil,  $R_f = 0.3$  (PE/EA = 1:1), 64% yield.  $^1\text{H}$  NMR (500 MHz,  $\text{CDCl}_3$ )  $\delta$  7.90 (ddd,  $J = 14.6, 8.1, 1.2$  Hz, 1H), 7.63 – 7.56 (m, 2H), 7.47 – 7.35 (m, 4H), 7.28-7.26 (m, 2H), 2.79 (s, 3H), 1.27 (d,  $J = 16.7$  Hz, 9H).  $^{13}\text{C}$  NMR (126 MHz,  $\text{CDCl}_3$ )  $\delta$  143.89 (d,  $J = 10.0$  Hz), 133.94 (d,  $J = 11.8$  Hz), 132.41 (d,  $J = 1.4$  Hz), 132.24 (d,  $J = 11.9$  Hz), 131.81 (d,  $J = 2.7$  Hz), 130.41 (s), 128.59 (s), 126.59 (d,  $J = 106.0$  Hz), 124.91 (d,  $J = 12.6$  Hz), 120.42 (d,  $J = 3.6$  Hz), 103.99 (d,  $J = 23.4$  Hz), 82.78 (d,  $J = 148.7$  Hz), 35.71 (d,  $J = 81.9$  Hz), 24.29 (d,  $J = 1.3$  Hz), 21.97 (d,  $J = 2.5$  Hz).  $^{31}\text{P}$  NMR (202 MHz,  $\text{CDCl}_3$ )  $\delta$  36.43. HRMS (ESI) calcd for  $\text{C}_{19}\text{H}_{22}\text{OP}^+$   $[\text{M}+\text{H}]^+ 297.1403$ , Found 297.1409. The enantiomeric excess was determined by Daicel Chiralcel IH (90% ee), *n*-Hexanes/IPA = 90/10, 1 mL/min,  $\lambda = 254$  nm,  $t$  (major) = 13.04 min,  $t$  (minor) = 10.34 min.  $[\alpha]_{\text{D}}^{20} = -3.59$  ( $c = 4.00$ , acetone).

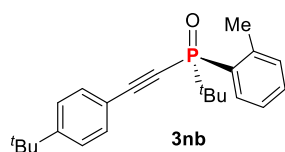

Colorless oil,  $R_f = 0.20$  (PE/EA = 2:1), 58% yield.  $^1\text{H}$  NMR (500 MHz,  $\text{DMSO}-d_6$ )  $\delta$  7.87 (dd,  $J = 14.3, 7.7$  Hz, 1H), 7.63 (d,  $J = 8.2$  Hz, 2H), 7.55-7.50 (m, 3H), 7.41-7.35 (m, 2H), 2.69 (s, 3H), 1.29 (s, 9H), 1.16 (d,  $J = 16.6$  Hz, 9H).  $^{13}\text{C}$  NMR (126 MHz,  $\text{DMSO}-d_6$ )  $\delta$  154.45 (s), 143.50 (d,  $J = 9.5$  Hz), 134.03 (d,  $J = 11.6$  Hz), 132.67 (d,  $J = 11.8$  Hz), 132.57 (s), 132.54 (s), 126.82 (d,  $J = 105.2$  Hz), 126.40 (s), 125.73 (d,  $J = 12.5$  Hz), 116.83 (d,  $J = 3.5$  Hz), 104.05 (d,  $J = 23.1$  Hz), 82.63 (d,  $J = 139.8$  Hz), 35.56 (d,  $J = 81.9$  Hz), 35.26 (s), 31.20 (s), 24.22 (s), 21.66 (d,  $J = 1.9$  Hz).  $^{31}\text{P}$  NMR (202 MHz,  $\text{DMSO}-d_6$ )  $\delta$  34.17. HRMS (ESI) calcd for  $\text{C}_{23}\text{H}_{30}\text{OP}^+$   $[\text{M}+\text{H}]^+ 353.2029$ , Found 353.2035. The enantiomeric excess was determined by Daicel Chiralcel AD-H (93% ee), *n*-Hexanes/IPA = 90/10, 1 mL/min,  $\lambda = 254$  nm,  $t$  (major) = 13.24 min,  $t$  (minor) = 11.64 min.  $[\alpha]_{\text{D}}^{20} = -49.35$  ( $c = 0.43$ , acetone).

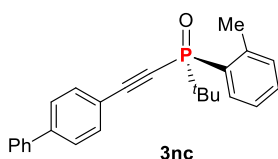

Colorless oil,  $R_f = 0.2$  (PE/EA = 2:1), 62% yield.  $^1\text{H}$  NMR (500 MHz,  $\text{CDCl}_3$ )  $\delta$  7.93 (dd,  $J = 14.7, 7.3$  Hz, 1H), 7.67 (d,  $J = 8.3$  Hz, 2H), 7.62 – 7.56 (m, 4H), 7.48 – 7.40 (m, 3H), 7.38 (t,  $J = 7.4$  Hz, 1H), 7.28 (dt,  $J = 7.5, 2.0$  Hz, 2H), 2.80 (s, 3H), 1.28 (d,  $J = 16.7$  Hz, 9H).  $^{13}\text{C}$  NMR (126 MHz,  $\text{CDCl}_3$ )  $\delta$  143.91 (d,  $J = 9.7$  Hz), 143.20 (s), 139.83 (s), 133.98 (d,  $J = 11.9$  Hz), 132.89 (d,  $J = 1.4$  Hz), 132.27 (d,  $J = 11.9$  Hz), 131.84 (d,  $J = 2.7$  Hz), 129.01 (s), 128.15 (s), 127.20 (d,  $J = 13.9$  Hz), 126.64 (d,  $J = 106.4$  Hz), 124.94 (d,  $J = 12.8$  Hz), 119.15 (d,  $J = 3.7$  Hz), 103.99 (d,  $J = 23.5$  Hz), 83.42 (d,  $J = 148.4$  Hz), 35.75 (d,  $J = 81.9$  Hz), 24.33 (s), 22.01 (d,  $J = 2.4$  Hz).  $^{31}\text{P}$  NMR (202 MHz,  $\text{CDCl}_3$ )  $\delta$  36.45. HRMS (ESI) calcd for  $\text{C}_{25}\text{H}_{26}\text{OP}^+$   $[\text{M}+\text{H}]^+ 373.1716$ , Found 373.1719. The enantiomeric excess was determined by Daicel Chiralcel IB-H (91% ee), *n*-Hexanes/IPA = 90/10, 1 mL/min,  $\lambda = 254$  nm,  $t$  (major) = 8.65 min,  $t$  (minor) = 10.08 min.  $[\alpha]_{\text{D}}^{20} = -34.67$  ( $c = 2.96$ , acetone).

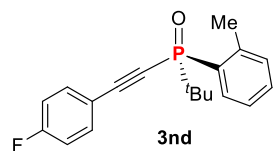

Colorless oil,  $R_f = 0.3$  (PE/EA = 2:1), 62% yield.  $^1\text{H}$  NMR (500 MHz,  $\text{CDCl}_3$ )  $\delta$  7.88 (ddd,  $J = 14.6, 8.1, 1.3$  Hz, 1H), 7.62 – 7.57 (m, 2H), 7.43 (ddd,  $J = 9.0, 3.0, 1.5$  Hz, 1H), 7.27 (dd,  $J = 6.6, 4.8$  Hz, 2H), 7.11 – 7.06 (m, 2H), 2.78 (s, 3H), 1.26 (d,  $J = 16.8$  Hz, 9H).  $^{13}\text{C}$  NMR (126 MHz,  $\text{CDCl}_3$ )  $\delta$  163.72 (d,  $J = 253.1$  Hz), 143.88 (d,  $J = 10.0$  Hz), 134.63 (dd,  $J = 9.1, 1.6$  Hz), 133.89 (s), 132.29 (d,  $J = 12.0$  Hz), 131.91 (d,  $J = 2.7$  Hz), 126.33 (d,  $J = 106.4$  Hz), 124.93 (d,  $J = 12.8$  Hz), 116.49 (t,  $J = 3.6$  Hz), 116.10 (d,  $J = 22.2$  Hz), 103.06 (d,  $J = 23.8$  Hz), 82.56 (d,  $J = 147.7$  Hz), 35.68 (d,  $J = 82.0$  Hz), 24.24 (d,  $J = 1.2$  Hz), 21.94 (d,  $J = 2.5$  Hz).  $^{31}\text{P}$  NMR (202 MHz,  $\text{CDCl}_3$ )  $\delta$  36.82.  $^{19}\text{F}$  NMR (471 MHz,  $\text{CDCl}_3$ )  $\delta$  -106.67. HRMS (ESI) calcd for  $\text{C}_{19}\text{H}_{21}\text{FOP}^+$   $[\text{M}+\text{H}]^+ 315.1309$ , Found 315.1320. The

enantiomeric excess was determined by Daicel Chiralcel OD-H (86% ee), *n*-Hexanes/IPA = 90/10, 1 mL/min,  $\lambda = 254$  nm,  $t$  (major) = 6.62 min,  $t$  (minor) = 5.98 min.  $[\alpha]_D^{20} = -5.04$  ( $c = 0.60$ , acetone).

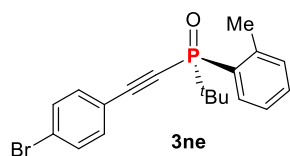

Colorless oil,  $R_f = 0.20$  (PE/EA = 2:1), 51% yield.  $^1\text{H NMR}$  (500 MHz,  $\text{CDCl}_3$ )  $\delta$  7.86 (dd,  $J = 14.5, 7.7$  Hz, 1H), 7.53 (d,  $J = 8.4$  Hz, 2H), 7.45 (d,  $J = 8.4$  Hz, 2H), 7.42 (d,  $J = 7.5$  Hz, 1H), 7.28 (dd,  $J = 11.2, 4.0$  Hz, 2H), 2.78 (s, 3H), 1.26 (d,  $J = 16.8$  Hz, 9H).  $^{13}\text{C NMR}$  (126 MHz,  $\text{CDCl}_3$ )  $\delta$  143.91 (d,  $J = 9.9$  Hz), 133.84 (s), 133.74 (s), 132.30 (d,  $J = 12.0$  Hz), 131.96 (s), 131.91 (d,  $J = 2.7$  Hz), 126.33 (d,  $J = 106.0$  Hz), 125.08 (s), 124.93 (d,  $J = 12.8$  Hz), 119.30 (d,  $J = 3.6$  Hz), 102.71 (d,  $J = 23.3$  Hz), 84.06 (d,  $J = 146.0$  Hz), 35.70 (d,  $J = 81.8$  Hz), 24.26 (s), 21.94 (d,  $J = 2.5$  Hz).  $^{31}\text{P NMR}$  (202 MHz,  $\text{CDCl}_3$ )  $\delta$  36.33. HRMS (ESI) calcd for  $\text{C}_{19}\text{H}_{21}\text{BrOP}^+$   $[\text{M}+\text{H}]^+$  375.0508, Found 375.0508. The enantiomeric excess was determined by Daicel Chiralcel IB-H (84% ee), *n*-Hexanes/IPA = 90/10, 1 mL/min,  $\lambda = 254$  nm,  $t$  (major) = 6.58 min,  $t$  (minor) = 7.50 min.  $[\alpha]_D^{20} = -14.43$  ( $c = 1.88$ , acetone).

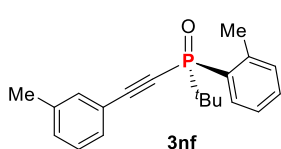

Colorless oil,  $R_f = 0.20$  (PE/EA = 2:1), 65% yield.  $^1\text{H NMR}$  (500 MHz,  $\text{CDCl}_3$ )  $\delta$  7.91 (ddd,  $J = 14.7, 8.1, 1.2$  Hz, 1H), 7.44-7.39 (m, 3H), 7.30-7.22 (m, 4H), 2.79 (s, 3H), 2.35 (s, 3H), 1.27 (d,  $J = 16.7$  Hz, 9H).  $^{13}\text{C NMR}$  (126 MHz,  $\text{CDCl}_3$ )  $\delta$  143.85 (d,  $J = 9.5$  Hz), 138.39 (s), 133.96 (d,  $J = 11.7$  Hz), 132.82 (d,  $J = 1.4$  Hz), 132.21 (d,  $J = 11.9$  Hz), 131.78 (d,  $J = 2.7$  Hz), 131.33 (s), 129.53 (s), 128.49 (s), 126.64 (d,  $J = 106.4$  Hz), 124.90 (d,  $J = 12.7$  Hz), 120.20 (d,  $J = 3.6$  Hz), 104.30 (d,  $J = 23.7$  Hz), 82.37 (d,  $J = 149.7$  Hz), 35.69 (d,  $J = 81.9$  Hz), 24.29 (s), 21.97 (d,  $J = 2.6$  Hz), 21.22 (s).  $^{31}\text{P NMR}$  (202 MHz,  $\text{CDCl}_3$ )  $\delta$  36.3. HRMS (ESI) calcd for  $\text{C}_{20}\text{H}_{24}\text{OP}^+$   $[\text{M}+\text{H}]^+$  311.1559, Found 311.1563. The enantiomeric excess was determined by Daicel Chiralcel AD-H (90% ee), *n*-Hexanes/IPA = 90/10, 1 mL/min,  $\lambda = 254$  nm,  $t$  (major) = 8.58 min,  $t$  (minor) = 7.64 min.  $[\alpha]_D^{20} = -14.55$  ( $c = 1.00$ , acetone).

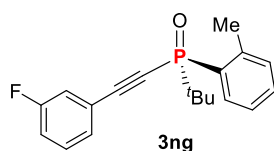

Colorless oil,  $R_f = 0.20$  (PE/EA = 2:1), 57% yield.  $^1\text{H NMR}$  (500 MHz,  $\text{CDCl}_3$ )  $\delta$  7.87 (ddd,  $J = 14.6, 8.1, 1.2$  Hz, 1H), 7.43 (t,  $J = 7.5$  Hz, 1H), 7.40-7.34 (m, 2H), 7.30-7.28 (m, 1H), 7.28-7.26 (m, 2H), 7.19-7.14 (m, 1H), 2.79 (s, 3H), 1.27 (d,  $J = 16.8$  Hz, 9H).  $^{13}\text{C NMR}$  (126 MHz,  $\text{CDCl}_3$ )  $\delta$  162.20 (d,  $J = 248.2$  Hz), 143.91 (d,  $J = 10.0$  Hz), 133.76 (d,  $J = 11.9$  Hz), 132.29 (d,  $J = 12.0$  Hz), 131.92 (d,  $J = 2.7$  Hz), 130.38 (d,  $J = 8.5$  Hz), 128.36 (d,  $J = 1.9$  Hz), 126.25 (d,  $J = 106.5$  Hz), 124.94 (d,  $J = 12.6$  Hz), 122.12 (dd,  $J = 9.2, 3.6$  Hz), 119.13 (dd,  $J = 23.8, 1.4$  Hz), 117.91 (d,  $J = 21.1$  Hz), 102.23 (dd,  $J = 22.9, 3.4$  Hz), 83.72 (d,  $J = 145.3$  Hz), 35.71 (d,  $J = 81.8$  Hz), 24.22 (s), 21.92 (d,  $J = 2.3$  Hz).  $^{19}\text{F NMR}$  (471 MHz,  $\text{CDCl}_3$ )  $\delta$  -111.65.  $^{31}\text{P NMR}$  (202 MHz,  $\text{CDCl}_3$ )  $\delta$  36.74. HRMS (ESI) calcd for  $\text{C}_{19}\text{H}_{21}\text{FOP}^+$   $[\text{M}+\text{H}]^+$  315.1309, Found 315.1310. The enantiomeric excess was determined by Daicel Chiralcel AD-H (84% ee), *n*-Hexanes/IPA = 90/10, 1 mL/min,  $\lambda = 254$  nm,  $t$  (major) = 10.85 min,  $t$  (minor) = 7.59 min.  $[\alpha]_D^{20} = -10.73$  ( $c = 1.24$ , acetone).

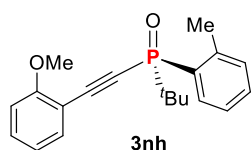

Colorless oil,  $R_f = 0.15$  (PE/EA = 1:1), 61% yield.  $^1\text{H NMR}$  (500 MHz,  $\text{CDCl}_3$ )  $\delta$  8.01 (ddd,  $J = 14.7, 8.1, 1.2$  Hz, 1H), 7.50 (dd,  $J = 7.6, 1.7$  Hz, 1H), 7.42-7.36 (m, 2H), 7.28-7.23 (m, 2H), 6.95-6.88 (m, 2H), 3.88 (s, 3H), 2.79 (s, 3H), 1.28 (d,  $J = 16.7$  Hz, 9H).  $^{13}\text{C NMR}$  (126 MHz,  $\text{CDCl}_3$ )  $\delta$  161.56 (s), 143.79 (d,  $J = 9.5$  Hz), 134.35 (d,  $J = 11.9$  Hz), 133.93 (d,  $J = 1.6$  Hz), 132.06 (d,  $J = 11.8$  Hz), 131.92 (s), 131.66 (d,  $J = 2.7$  Hz), 126.80 (d,  $J = 106.0$  Hz), 124.81 (d,  $J = 12.8$  Hz), 120.46 (s), 110.79 (s),



109.79 (d,  $J = 3.7$  Hz), 100.87 (d,  $J = 24.8$  Hz), 86.60 (d,  $J = 152.2$  Hz), 55.78 (s), 35.75 (d,  $J = 81.9$  Hz), 24.23 (s), 21.97 (d,  $J = 2.6$  Hz).  $^{31}\text{P}$  NMR (202 MHz,  $\text{CDCl}_3$ )  $\delta$  36.31. HRMS (ESI) calcd for  $\text{C}_{20}\text{H}_{24}\text{O}_2\text{P}^+$   $[\text{M}+\text{H}]^+$  327.1508, Found 327.1508. The enantiomeric excess was determined by Daicel Chiralcel AD (90% ee), *n*-Hexanes/IPA = 90/10, 1 mL/min,  $\lambda = 300$  nm,  $t$  (major) = 15.46 min,  $t$  (minor) = 10.12 min.  $[\alpha]_{\text{D}}^{20} = -8.83$  ( $c = 1.15$ , acetone).

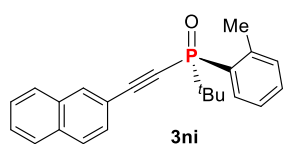

Colorless oil,  $R_f = 0.20$  (PE/EA = 2:1), 53% yield.  $^1\text{H}$  NMR (500 MHz,  $\text{CDCl}_3$ )  $\delta$  8.13 (s, 1H), 7.96 (dd,  $J = 14.5, 7.7$  Hz, 1H), 7.85 – 7.80 (m, 3H), 7.58 (d,  $J = 8.4$  Hz, 1H), 7.56 – 7.50 (m, 2H), 7.42 (t,  $J = 7.5$  Hz, 1H), 7.31 – 7.25 (m, 2H), 2.81 (s, 3H), 1.30 (d,  $J = 16.7$  Hz, 9H).  $^{13}\text{C}$  NMR (126 MHz,  $\text{CDCl}_3$ )  $\delta$  143.91 (d,  $J = 9.8$  Hz), 134.04 (s), 133.94 (s), 133.69 (s), 133.36 (d,  $J = 1.6$  Hz), 132.60 (s), 132.32 (s), 132.23 (s), 131.86 (d,  $J = 2.7$  Hz), 128.43 (s), 128.08 (s), 127.92 (s), 127.46 (d,  $J = 97.6$  Hz), 126.21 (s), 124.96 (d,  $J = 12.8$  Hz), 117.56 (d,  $J = 3.7$  Hz), 104.47 (d,  $J = 23.7$  Hz), 83.00 (d,  $J = 148.3$  Hz), 35.77 (d,  $J = 82.0$  Hz), 24.35 (d,  $J = 1.1$  Hz), 22.01 (d,  $J = 2.3$  Hz).  $^{31}\text{P}$  NMR (202 MHz,  $\text{CDCl}_3$ )  $\delta$  36.53. HRMS (ESI) calcd for  $\text{C}_{23}\text{H}_{24}\text{OP}^+$   $[\text{M}+\text{H}]^+$  347.1559, Found 347.1558. The enantiomeric excess was determined by Daicel Chiralcel AD-H (81% ee), *n*-Hexanes/IPA = 80/20, 1 mL/min,  $\lambda = 254$  nm,  $t$  (major) = 17.07 min,  $t$  (minor) = 12.04 min.  $[\alpha]_{\text{D}}^{20} = -26.96$  ( $c = 3.21$ , acetone).

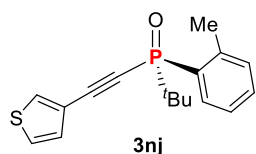

Colorless oil,  $R_f = 0.40$  (PE/EA = 2:1), 40% yield.  $^1\text{H}$  NMR (500 MHz,  $\text{DMSO}-d_6$ )  $\delta$  8.26 (d,  $J = 1.9$  Hz, 1H), 7.85 (dd,  $J = 14.3, 7.7$  Hz, 1H), 7.74 (dd,  $J = 4.8, 2.9$  Hz, 1H), 7.52 (t,  $J = 7.4$  Hz, 1H), 7.43 – 7.33 (m, 3H), 2.68 (s, 3H), 1.15 (d,  $J = 16.6$  Hz, 9H).  $^{13}\text{C}$  NMR (126 MHz,  $\text{DMSO}-d_6$ )  $\delta$  143.51 (d,  $J = 9.9$  Hz), 134.84 (d,  $J = 1.4$  Hz), 134.05 (d,  $J = 11.6$  Hz), 132.66 (d,  $J = 11.8$  Hz), 132.53 (d,  $J = 2.4$  Hz), 130.20 (s), 128.29 (s), 126.82 (d,  $J = 104.8$  Hz), 125.73 (d,  $J = 12.3$  Hz), 118.79 (d,  $J = 3.7$  Hz), 99.45 (d,  $J = 23.5$  Hz), 82.78 (d,  $J = 145.8$  Hz), 35.53 (d,  $J = 81.9$  Hz), 24.23 (s), 21.65 (d,  $J = 1.8$  Hz).  $^{31}\text{P}$  NMR (202 MHz,  $\text{DMSO}-d_6$ )  $\delta$  34.36. HRMS (ESI) calcd for  $\text{C}_{17}\text{H}_{20}\text{OPS}^+$   $[\text{M}+\text{H}]^+$  303.0967, Found 303.0976. The enantiomeric excess was determined by Daicel Chiralcel IB-H (78% ee), *n*-Hexanes/IPA = 97.5/2.5, 1 mL/min,  $\lambda = 254$  nm,  $t$  (major) = 26.53 min,  $t$  (minor) = 29.90 min.  $[\alpha]_{\text{D}}^{20} = -15.08$  ( $c = 0.48$ , acetone).

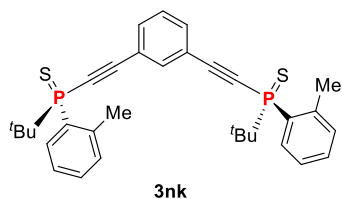

White solid,  $R_f = 0.20$  (PE/EA = 10:1), 33% yield.  $^1\text{H}$  NMR (500 MHz,  $\text{CDCl}_3$ )  $\delta$  8.17 (dd,  $J = 15.8, 7.8$  Hz, 2H), 7.81 (s, 1H), 7.66 (dd,  $J = 7.8, 1.5$  Hz, 2H), 7.46 – 7.40 (m, 3H), 7.32 (t,  $J = 7.6$  Hz, 2H), 7.28 – 7.24 (m, 2H), 2.88 (s, 6H), 1.33 (dd,  $J = 18.8, 1.0$  Hz, 18H).  $^{13}\text{C}$  NMR (126 MHz,  $\text{CDCl}_3$ )  $\delta$  142.83 (d,  $J = 10.9$  Hz), 135.53 (d,  $J = 2.0$  Hz), 134.65 (d,  $J = 11.4$  Hz), 133.70 (s), 132.96 (d,  $J = 11.8$  Hz), 131.87 (d,  $J = 2.8$  Hz), 129.04 (s), 126.19 (s), 125.46 (d,  $J = 12.9$  Hz), 121.51 (d,  $J = 3.7$  Hz), 104.16 (d,  $J = 20.1$  Hz), 83.42 (d,  $J = 132.4$  Hz), 38.73 (d,  $J = 58.6$  Hz), 24.75 (d,  $J = 3.2$  Hz), 23.23 (d,  $J = 2.9$  Hz).  $^{31}\text{P}$  NMR (202 MHz,  $\text{CDCl}_3$ )  $\delta$  47.46 (s). HRMS (ESI) calcd for  $\text{C}_{32}\text{H}_{37}\text{P}_2\text{S}_2^+$   $[\text{M}+\text{H}]^+$  547.1806, Found 547.1810. The enantiomeric excess was determined by Daicel Chiralcel IB-H (97% ee, 5:1 dr), *n*-Hexanes/IPA = 90/10, 1 mL/min,  $\lambda = 254$  nm,  $t$  (major) = 7.08 min,  $t_1 = 7.84$  min,  $t_2 = 8.87$  min.  $[\alpha]_{\text{D}}^{20} = -1.95$  ( $c = 0.40$ , acetone).

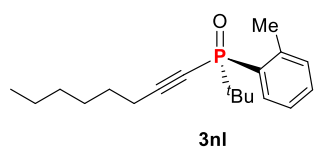

Colorless oil,  $R_f = 0.30$  (PE/EA = 2:1), 38% yield.  $^1\text{H NMR}$  (500 MHz,  $\text{CDCl}_3$ )  $\delta$  7.82 (ddd,  $J = 14.6, 8.0, 1.2$  Hz, 1H), 7.39 (td,  $J = 7.5, 1.5$  Hz, 1H), 7.24 (t,  $J = 6.5$  Hz, 2H), 2.74 (s, 3H), 2.44 (td,  $J = 7.1, 3.3$  Hz, 2H), 1.67 – 1.60 (m, 2H), 1.49 – 1.41 (m, 2H), 1.31 (td,  $J = 7.0, 3.2$  Hz, 4H), 1.19 (d,  $J = 16.6$  Hz, 9H), 0.90 (t,  $J = 7.0$  Hz, 3H).  $^{13}\text{C NMR}$  (126 MHz,  $\text{CDCl}_3$ )  $\delta$  143.77 (d,  $J = 9.5$  Hz), 133.99 (d,  $J = 12.0$  Hz), 132.10 (d,  $J = 11.8$  Hz), 131.60 (d,  $J = 2.7$  Hz), 126.85 (d,  $J = 105.9$  Hz), 124.69 (d,  $J = 12.8$  Hz), 107.94 (d,  $J = 24.5$  Hz), 74.44 (d,  $J = 155.1$  Hz), 35.33 (d,  $J = 82.5$  Hz), 31.17 (s), 28.58 (s), 27.65 (s), 24.19 (d,  $J = 1.3$  Hz), 22.49 (s), 21.89 (d,  $J = 2.5$  Hz), 19.67 (d,  $J = 2.7$  Hz), 14.00 (s).  $^{31}\text{P NMR}$  (202 MHz,  $\text{CDCl}_3$ )  $\delta$  35.67. HRMS (ESI) calcd for  $\text{C}_{19}\text{H}_{30}\text{OP}^+$   $[\text{M}+\text{H}]^+$  305.2029, Found 305.2028. The enantiomeric excess was determined by Daicel Chiralcel IH-H (93% ee), *n*-Hexanes/IPA = 90/10, 1 mL/min,  $\lambda = 271$  nm,  $t$  (major) = 6.60 min,  $t$  (minor) = 5.33 min.  $[\alpha]_{\text{D}}^{20} = 2.63$  ( $c = 2.41$ , acetone).

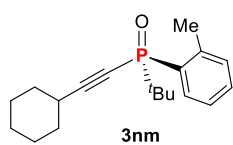

Colorless oil,  $R_f = 0.30$  (PE/EA = 2:1), 40% yield.  $^1\text{H NMR}$  (500 MHz,  $\text{CDCl}_3$ )  $\delta$  7.82 (dd,  $J = 14.4, 7.6$  Hz, 1H), 7.39 (t,  $J = 7.5$  Hz, 1H), 7.26 – 7.21 (m, 2H), 2.74 (s, 3H), 2.69–2.60 (m, 1H), 1.92–1.83 (m, 2H), 1.79–1.69 (m, 2H), 1.65 – 1.49 (m, 3H), 1.45–1.32 (m, 3H), 1.19 (d,  $J = 16.5$  Hz, 9H).  $^{13}\text{C NMR}$  (126 MHz,  $\text{CDCl}_3$ )  $\delta$  143.76 (d,  $J = 9.7$  Hz), 134.02 (d,  $J = 11.8$  Hz), 132.08 (d,  $J = 11.9$  Hz), 131.57 (d,  $J = 2.7$  Hz), 126.94 (d,  $J = 105.8$  Hz), 124.71 (d,  $J = 12.7$  Hz), 111.28 (d,  $J = 23.5$  Hz), 74.21 (d,  $J = 154.8$  Hz), 35.36 (d,  $J = 82.6$  Hz), 31.52 (s), 29.67 (d,  $J = 1.7$  Hz), 25.64 (s), 24.58 (s), 24.23 (d,  $J = 1.2$  Hz), 21.94 (d,  $J = 2.1$  Hz).  $^{31}\text{P NMR}$  (202 MHz,  $\text{CDCl}_3$ )  $\delta$  35.34. HRMS (ESI) calcd for  $\text{C}_{19}\text{H}_{28}\text{OP}^+$   $[\text{M}+\text{H}]^+$  303.1872, Found 303.1878. The enantiomeric excess was determined by Daicel Chiralcel AD-H (90% ee), *n*-Hexanes/IPA = 90/10, 1 mL/min,  $\lambda = 271$  nm,  $t$  (major) = 7.03 min,  $t$  (minor) = 6.02 min.  $[\alpha]_{\text{D}}^{20} = -8.02$  ( $c = 1.00$ , acetone).

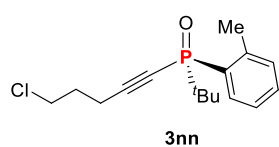

Colorless oil,  $R_f = 0.30$  (PE/EA = 2:1), 35% yield.  $^1\text{H NMR}$  (500 MHz,  $\text{CDCl}_3$ )  $\delta$  7.79 (dd,  $J = 14.7, 7.5$  Hz, 1H), 7.40 (t,  $J = 7.5$  Hz, 1H), 7.28 – 7.21 (m, 2H), 3.67 (t,  $J = 6.2$  Hz, 2H), 2.74 (s, 3H), 2.66 (td,  $J = 6.9, 3.3$  Hz, 2H), 2.11 – 2.05 (m, 2H), 1.19 (d,  $J = 16.7$  Hz, 9H).  $^{13}\text{C NMR}$  (126 MHz,  $\text{CDCl}_3$ )  $\delta$  143.80 (d,  $J = 9.5$  Hz), 133.84 (d,  $J = 11.9$  Hz), 132.18 (d,  $J = 11.9$  Hz), 131.75 (d,  $J = 2.7$  Hz), 126.55 (d,  $J = 106.4$  Hz), 124.80 (d,  $J = 12.6$  Hz), 105.44 (d,  $J = 23.8$  Hz), 75.67 (d,  $J = 151.4$  Hz), 43.34 (s), 35.35 (d,  $J = 81.9$  Hz), 30.27 (d,  $J = 1.3$  Hz), 24.16 (s), 21.87 (d,  $J = 2.1$  Hz), 17.09 (d,  $J = 2.7$  Hz).  $^{31}\text{P NMR}$  (202 MHz,  $\text{CDCl}_3$ )  $\delta$  36.03. HRMS (ESI) calcd for  $\text{C}_{16}\text{H}_{23}\text{ClOP}^+$   $[\text{M}+\text{H}]^+$  297.1170, Found 297.1169. The enantiomeric excess was determined by Daicel Chiralcel AD-H (84% ee), *n*-Hexanes/IPA = 90/10, 1 mL/min,  $\lambda = 271$  nm,  $t$  (major) = 8.82 min,  $t$  (minor) = 7.27 min.  $[\alpha]_{\text{D}}^{20} = 0.54$  ( $c = 0.50$ , acetone).

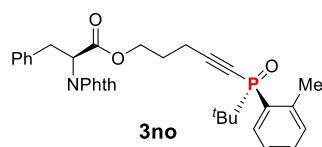

White solid,  $R_f = 0.20$  (PE/EA = 1:1), 32% yield.  $^1\text{H NMR}$  (400 MHz,  $\text{CDCl}_3$ )  $\delta$  7.82 – 7.74 (m, 3H), 7.71 – 7.66 (m, 2H), 7.42 – 7.37 (m, 1H), 7.27 – 7.21 (m, 2H), 7.20 – 7.11 (m, 5H), 5.17 (dd,  $J = 11.2, 5.3$  Hz, 1H), 4.40 – 4.25 (m, 2H), 3.64 – 3.47 (m, 2H), 2.72 (s, 3H), 2.46 (tdd,  $J = 7.1, 3.2, 1.5$  Hz, 2H), 2.01 – 1.92 (m, 2H), 1.17 (dd,  $J = 16.7, 2.4$  Hz, 9H).  $^{13}\text{C NMR}$  (101 MHz,  $\text{CDCl}_3$ )  $\delta$  168.73 (s), 167.40 (s), 143.77 (d,  $J = 9.6$  Hz), 136.55 (s), 134.23 (s), 133.89 (d,  $J = 11.9$  Hz), 132.14 (d,  $J = 11.9$  Hz), 131.72 (d,  $J = 2.8$  Hz), 131.46 (s), 128.70 (d,  $J = 25.9$  Hz), 126.90 (s), 126.50 (d,  $J = 106.2$  Hz), 124.83 (d,  $J = 12.8$  Hz), 123.50 (s), 105.62 (d,  $J = 23.8$  Hz), 77.28 (s), 75.45 (d,  $J =$

151.4 Hz), 64.10 (s), 53.25 (s), 35.33 (d,  $J = 82.2$  Hz), 34.77 (s), 26.84 (d,  $J = 1.0$  Hz), 24.15 (d,  $J = 1.1$  Hz), 21.86 (d,  $J = 2.3$  Hz), 16.31 (d,  $J = 2.7$  Hz).  $^{31}\text{P}$  NMR (162 MHz,  $\text{CDCl}_3$ )  $\delta$  36.09. HRMS (ESI) calcd for  $\text{C}_{25}\text{H}_{31}\text{O}_3\text{P}^+$   $[\text{M}+\text{H}]^+$  410.2005, Found 410.2029.  $\text{dr} = 9:1$  ( $\delta$  38.10:  $\delta$  36.09 of  $^{31}\text{P}$  NMR).  $[\alpha]_{\text{D}}^{20} = -61.06$  ( $c = 4.15$ , acetone).

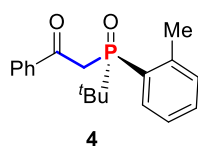

Colorless solid,  $R_f = 0.30$  (PE/EA = 1:2), 73% yield.  $^1\text{H}$  NMR (500 MHz,  $\text{CDCl}_3$ )  $\delta$  8.10 – 8.07 (m, 2H), 7.57 – 7.50 (m, 2H), 7.42 (t,  $J = 7.7$  Hz, 2H), 7.37 (t,  $J = 7.5$  Hz, 1H), 7.25 (t,  $J = 7.5$  Hz, 1H), 7.21 (dd,  $J = 7.6, 3.8$  Hz, 1H), 4.06 (dd,  $J = 15.3, 13.3$  Hz, 1H), 3.80 (dd,  $J = 13.2, 10.6$  Hz, 1H), 2.67 (s, 3H), 1.23 (d,  $J = 15.3$  Hz, 9H).  $^{13}\text{C}$  NMR (126 MHz,  $\text{CDCl}_3$ )  $\delta$  194.07 (d,  $J = 6.2$  Hz), 144.86 (d,  $J = 7.1$  Hz), 137.34 (s), 133.36 (s), 133.05 (d,  $J = 11.8$  Hz), 132.59 (d,  $J = 10.6$  Hz), 131.67 (d,  $J = 2.7$  Hz), 129.61 (s), 128.37 (s), 125.93 (d,  $J = 88.9$  Hz), 124.55 (d,  $J = 12.0$  Hz), 38.92 (d,  $J = 48.1$  Hz), 35.81 (d,  $J = 69.0$  Hz), 24.56 (s), 22.00 (d,  $J = 2.3$  Hz).  $^{31}\text{P}$  NMR (202 MHz,  $\text{CDCl}_3$ )  $\delta$  49.52 (s). HRMS (ESI) calcd for  $\text{C}_{19}\text{H}_{24}\text{O}_2\text{P}^+$   $[\text{M}+\text{H}]^+$  315.1508, Found 315.1506. The enantiomeric excess was determined by Daicel Chiralcel OD-H (84% ee),  $n$ -Hexanes/IPA = 90/10, 1 mL/min,  $\lambda = 254$  nm,  $t$  (major) = 10.11 min,  $t$  (minor) = 12.33 min.  $[\alpha]_{\text{D}}^{20} = 1.95$  ( $c = 0.40$ , acetone).

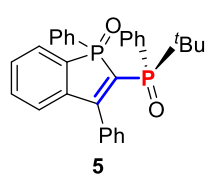

Colorless solid,  $R_f = 0.30$  (EA), 58% yield.  $^1\text{H}$  NMR (500 MHz,  $\text{CDCl}_3$ )  $\delta$  8.12 (ddd,  $J = 12.3, 7.8, 1.6$  Hz, 2H), 7.79 (t,  $J = 7.3$  Hz, 1H), 7.65 (d,  $J = 4.7$  Hz, 1H), 7.54 – 7.41 (m, 7H), 7.29 (s, 1H), 7.13 (ddd,  $J = 10.5, 8.8, 4.4$  Hz, 2H), 7.06 – 6.99 (m, 3H), 6.91 (s, 1H), 6.60 (d,  $J = 4.9$  Hz, 1H), 1.16 (d,  $J = 16.1$  Hz, 9H).  $^{13}\text{C}$  NMR (126 MHz,  $\text{CDCl}_3$ )  $\delta$  169.57 (dd,  $J = 11.5, 3.9$  Hz), 142.65 (dd,  $J = 24.8, 14.7$  Hz), 134.76 (d,  $J = 4.9$  Hz), 133.91 (d,  $J = 5.0$  Hz), 133.06 (dd,  $J = 13.0, 6.5$  Hz), 132.68 (s), 132.51 (d,  $J = 9.8$  Hz), 131.87 (d,  $J = 2.8$  Hz), 131.70 (d,  $J = 5.1$  Hz), 131.60 (s), 130.96 (d,  $J = 4.9$  Hz), 130.65 (d,  $J = 9.4$  Hz), 130.38 (d,  $J = 9.4$  Hz), 130.36 (s), 129.47 (d,  $J = 8.8$  Hz), 128.91 (s), 127.79 (dd,  $J = 12.5, 5.9$  Hz), 127.69 (dd,  $J = 65.3, 3.7$  Hz), 126.98 (d,  $J = 60.8$  Hz), 125.47 (d,  $J = 10.1$  Hz), 34.15 (d,  $J = 68.7$  Hz), 24.68 (s).  $^{31}\text{P}$  NMR (202 MHz,  $\text{CDCl}_3$ )  $\delta$  64.16 (d,  $J = 31.8$  Hz, 1P), 16.61 (d,  $J = 30.4$  Hz, 1P). HRMS (ESI) calcd for  $\text{C}_{30}\text{H}_{29}\text{O}_2\text{P}_2^+$   $[\text{M}+\text{H}]^+$  483.1637, Found 483.1645. The enantiomeric excess was determined by Daicel Chiralcel AD-H (86% ee),  $n$ -Hexanes/IPA = 90/10, 1 mL/min,  $\lambda = 254$  nm,  $t$  (major) = 31.22 min,  $t$  (minor) = 22.36 min.  $[\alpha]_{\text{D}}^{20} = -4.78$  ( $c = 2.25$ , acetone).

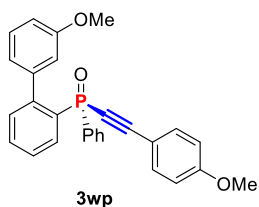

Colorless solid,  $R_f = 0.30$  (PE/EA = 1:3), 64% yield.  $^1\text{H}$  NMR (500 MHz,  $d_6$ -acetone)  $\delta$  8.15 (dd,  $J = 15.3, 7.7$  Hz, 1H), 7.65 (t,  $J = 7.4$  Hz, 1H), 7.58 – 7.48 (m, 3H), 7.45 (d,  $J = 7.9$  Hz, 3H), 7.34 (d,  $J = 6.9$  Hz, 3H), 7.09 (t,  $J = 7.8$  Hz, 1H), 6.97 (d,  $J = 8.0$  Hz, 2H), 6.84 (s, 1H), 6.80 (d,  $J = 7.4$  Hz, 2H), 3.82 (s, 3H), 3.67 (s, 3H).  $^{13}\text{C}$  NMR (126 MHz, Acetone)  $\delta$  161.58 (s), 158.93 (s), 146.18 (d,  $J = 10.3$  Hz), 141.59 (d,  $J = 4.6$  Hz), 134.18 (d,  $J = 1.4$  Hz), 133.99 (d,  $J = 122.2$  Hz), 132.89 (d,  $J = 11.8$  Hz), 132.64 (d,  $J = 119.6$  Hz), 132.09 (d,  $J = 2.5$  Hz), 131.46 (d,  $J = 1.2$  Hz), 131.41 (d,  $J = 6.2$  Hz), 130.75 (d,  $J = 11.0$  Hz), 128.57 (s), 128.17 (d,  $J = 13.3$  Hz), 127.15 (d,  $J = 13.0$  Hz), 122.41 (s), 115.36 (s), 114.37 (s), 113.74 (s), 111.73 (d,  $J = 3.9$  Hz), 104.85 (d,  $J = 30.0$  Hz), 82.91 (d,  $J = 171.1$  Hz), 55.08 (s), 54.55 (s).  $^{31}\text{P}$  NMR (202 MHz, Acetone)  $\delta$  5.83 (s). HRMS (ESI) calcd for  $\text{C}_{28}\text{H}_{24}\text{O}_3\text{P}^+$   $[\text{M}+\text{H}]^+$  439.1458, Found 439.1460. The enantiomeric excess was determined by

Daicel Chiralcel IB-H (48% ee), *n*-Hexanes/IPA = 90/10, 1 mL/min,  $\lambda = 254$  nm,  $t$  (major) = 23.91 min,  $t$  (minor) = 29.01 min.  $[\alpha]_D^{20} = 2.54$  ( $c = 0.90$ , acetone).

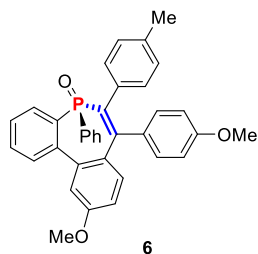

Colorless solid,  $R_f = 0.20$  (PE/EA = 1: 3), 53% yield.  $^1\text{H}$  NMR (500 MHz,  $\text{CD}_2\text{Cl}_2$ )  $\delta$  8.10 (dd,  $J = 11.7, 7.7$  Hz, 1H), 7.73 (s, 2H), 7.60 (dt,  $J = 14.5, 10.1$  Hz, 2H), 7.48 (d,  $J = 7.4$  Hz, 1H), 7.38 (dd,  $J = 12.9, 7.6$  Hz, 2H), 7.22 (t,  $J = 7.2$  Hz, 1H), 7.12 (t,  $J = 7.0$  Hz, 2H), 7.01 (s, 2H), 6.79 (d,  $J = 7.7$  Hz, 2H), 6.73 (s, 1H), 6.60 (dd,  $J = 13.9, 8.3$  Hz, 3H), 6.42 (d,  $J = 8.8$  Hz, 1H), 3.68 (s, 6H), 2.29 (s, 3H).  $^{13}\text{C}$  NMR (126 MHz,  $\text{CD}_2\text{Cl}_2$ )  $\delta$  158.51 (d,  $J = 57.4$  Hz), 148.89 (d,  $J = 11.2$  Hz), 141.92 (s), 140.89 (d,  $J = 10.6$  Hz), 136.59 (d,  $J = 1.2$  Hz), 136.24 (d,  $J = 99.2$  Hz), 135.91 (d,  $J = 92.5$  Hz), 135.12 (d,  $J = 15.1$  Hz), 133.93 (d,  $J = 5.7$  Hz), 133.33 (s), 133.07 (d,  $J = 51.5$  Hz), 132.63 (d,  $J = 49.2$  Hz), 132.25 (s), 131.94 (d,  $J = 10.0$  Hz), 131.81 (d,  $J = 1.8$  Hz), 131.35 (s), 130.91 (d,  $J = 2.4$  Hz), 130.43 (d,  $J = 6.2$  Hz), 130.09 (d,  $J = 10.3$  Hz), 129.80 (d,  $J = 11.3$  Hz), 128.51 (d,  $J = 12.2$  Hz), 128.40 (s), 127.75 (d,  $J = 12.6$  Hz), 127.63 (d,  $J = 10.9$  Hz), 113.95 (d,  $J = 76.0$  Hz), 112.80 (s), 55.37 (s), 55.08 (s), 20.99 (s).  $^{31}\text{P}$  NMR (202 MHz,  $\text{CD}_2\text{Cl}_2$ )  $\delta$  19.36. HRMS (ESI) calcd for  $\text{C}_{35}\text{H}_{30}\text{O}_3\text{P}^+ [\text{M}+\text{H}]^+ 529.1927$ , Found 529.1937. The enantiomeric excess was determined by Daicel Chiralcel IB-H (64% ee), *n*-Hexanes/IPA = 70/30, 1 mL/min,  $\lambda = 318$  nm,  $t$  (major) = 10.21 min,  $t$  (minor) = 4.87 min.  $[\alpha]_D^{20} = -702.44$  ( $c = 0.05$ , acetone). 30% yield, and 99% ee from recrystal.

## 8. Copies of NMR spectroscopy.

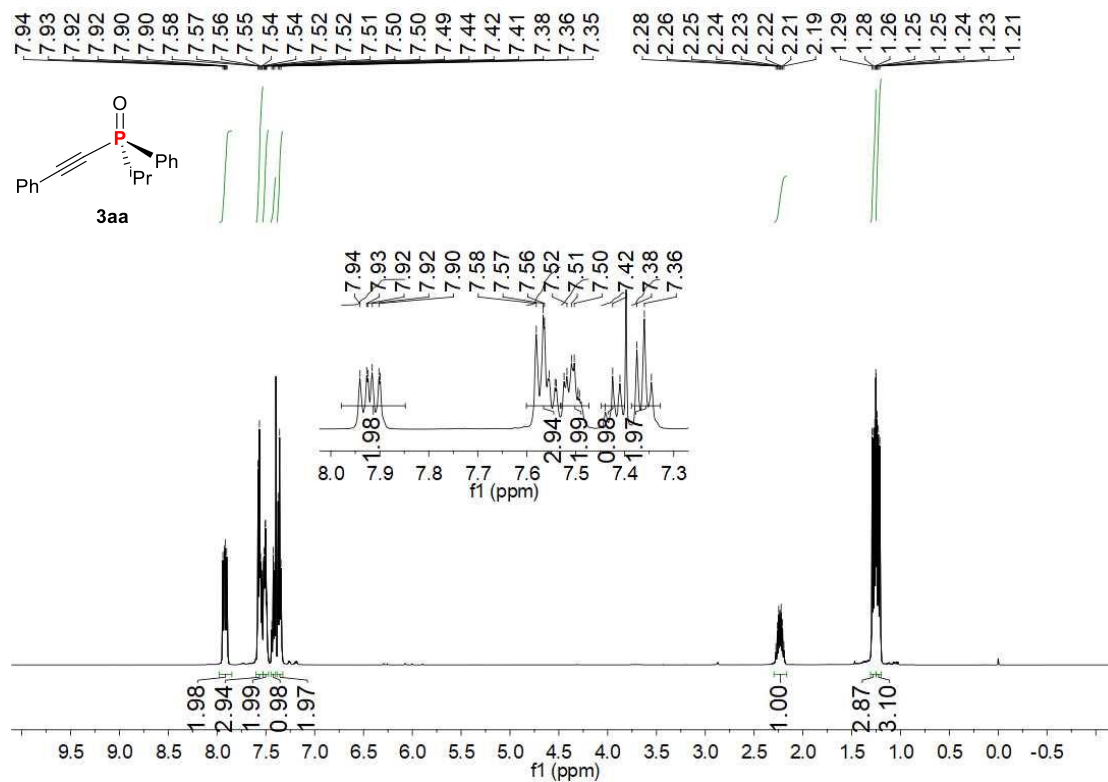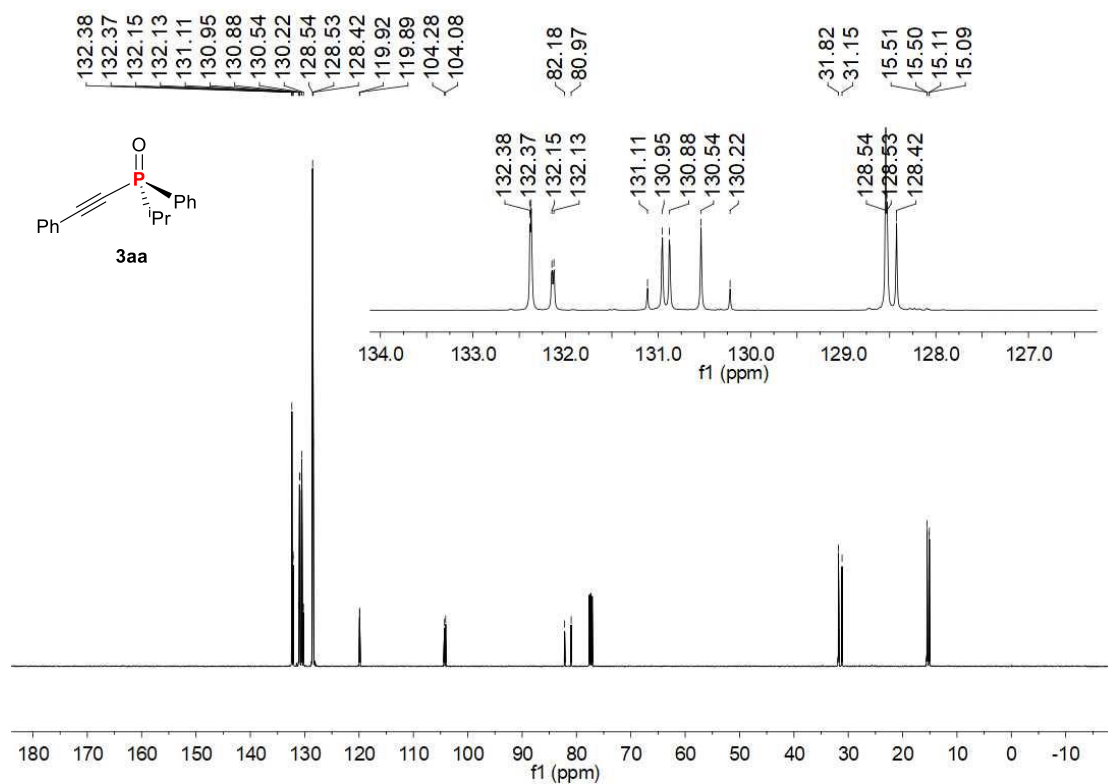

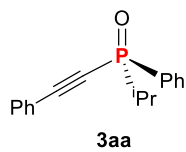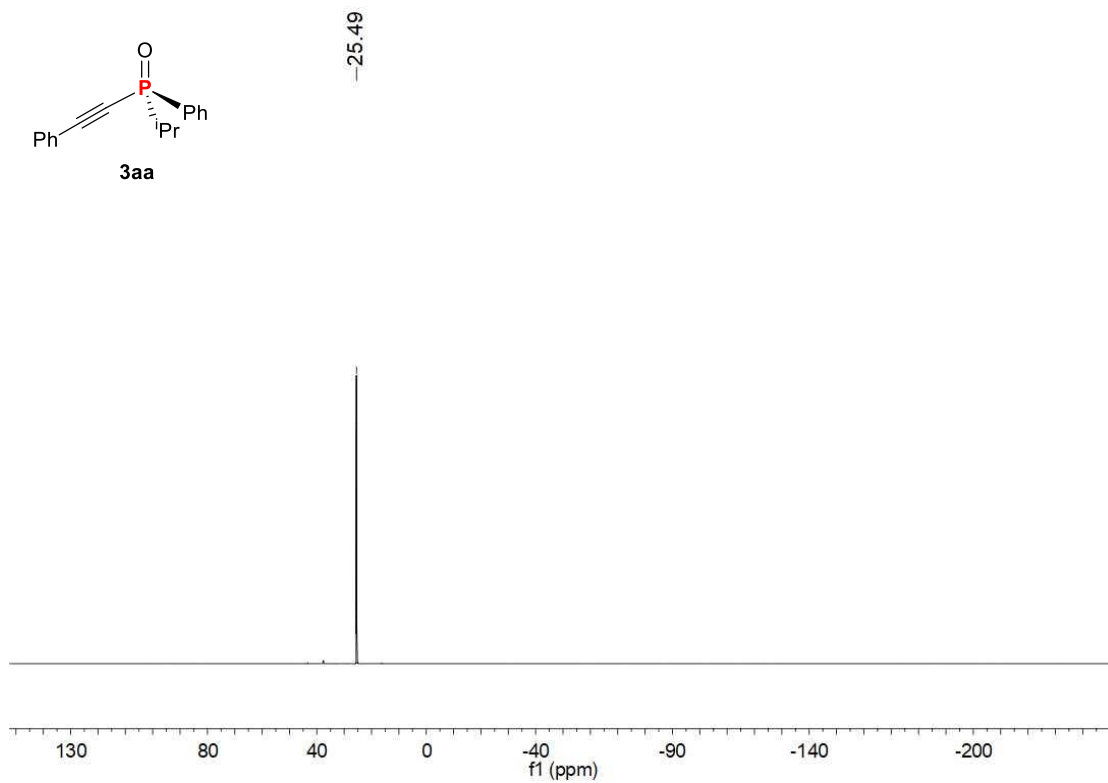

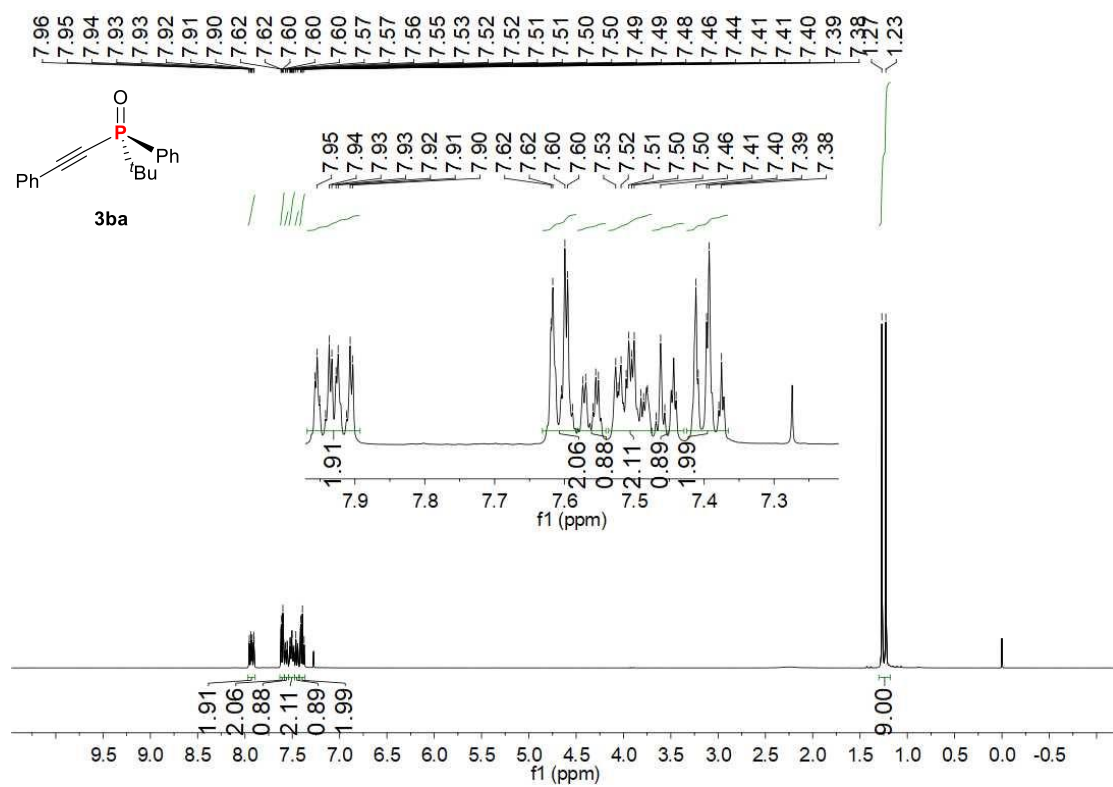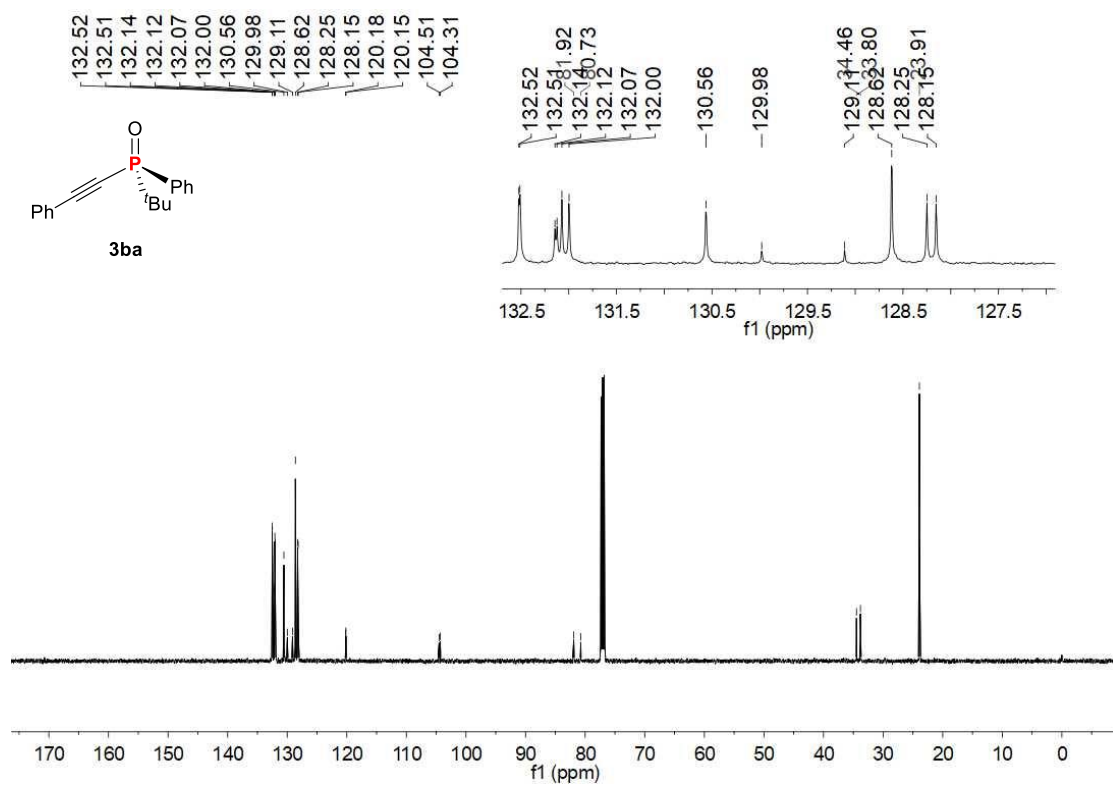

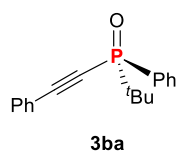

-31.30

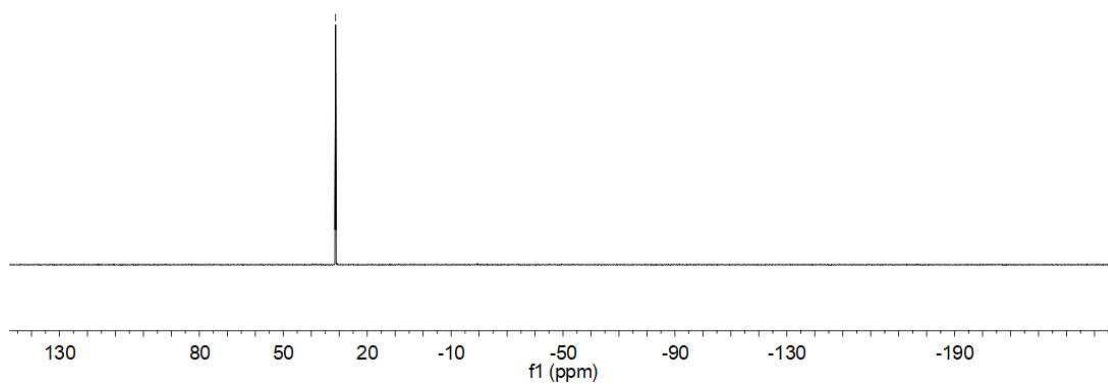



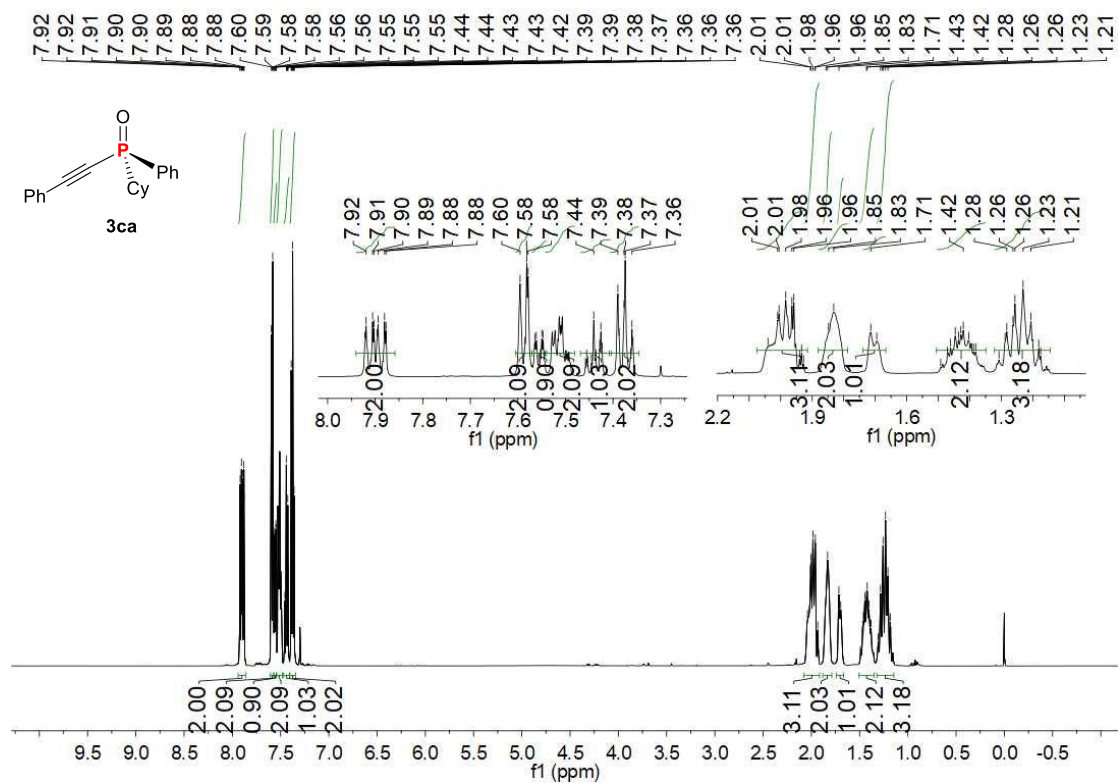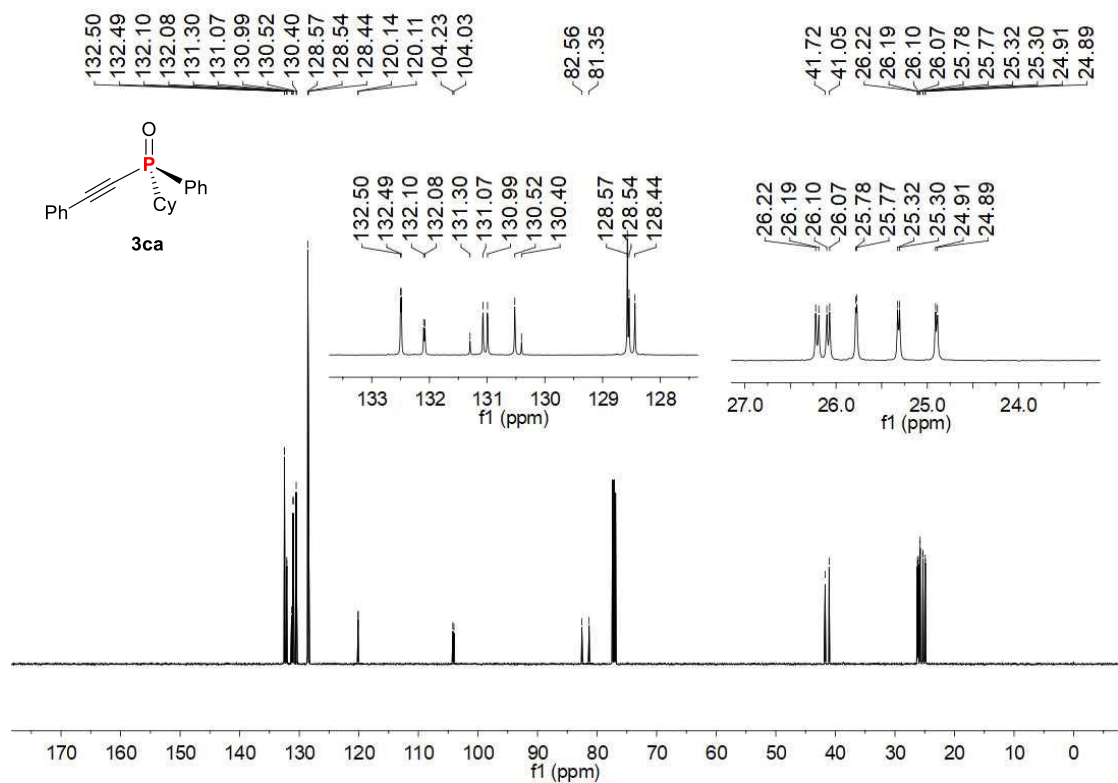

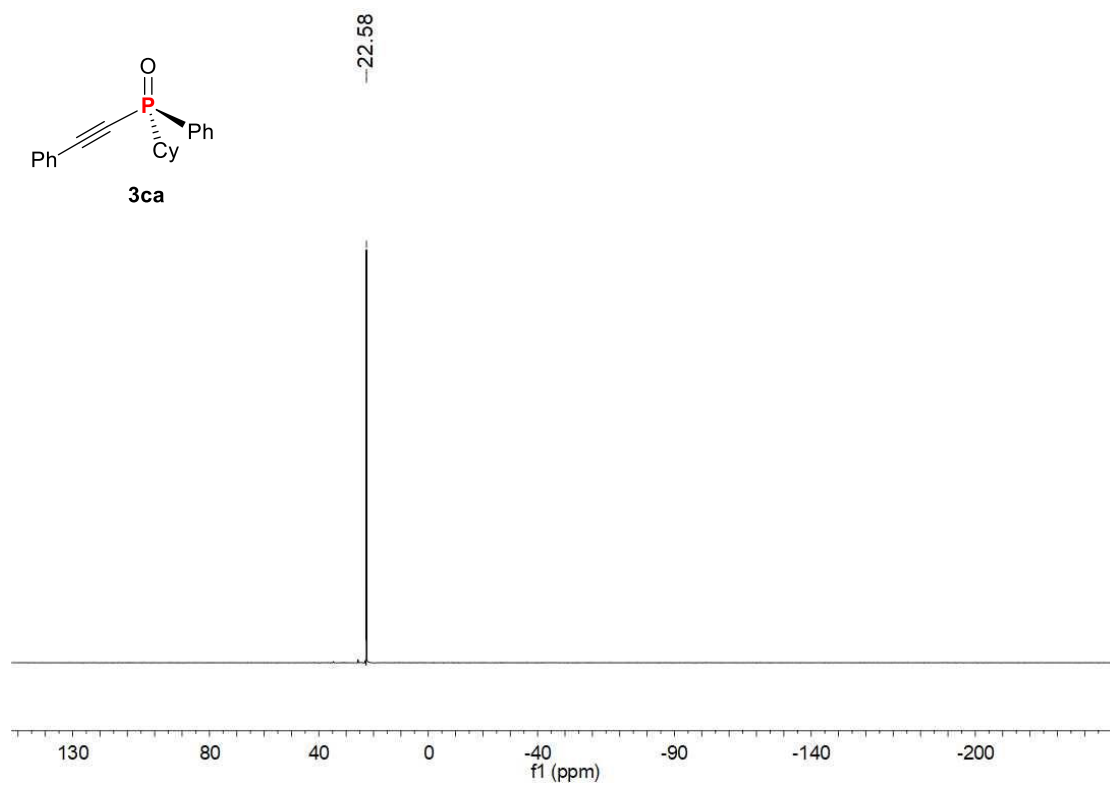

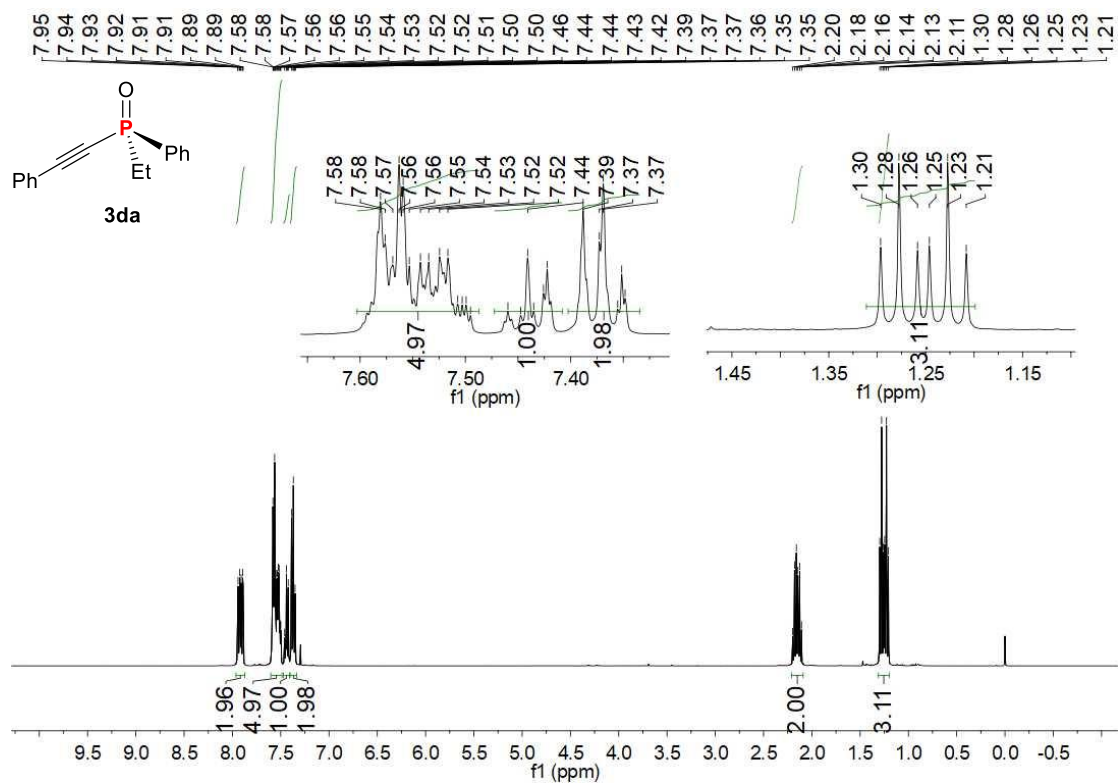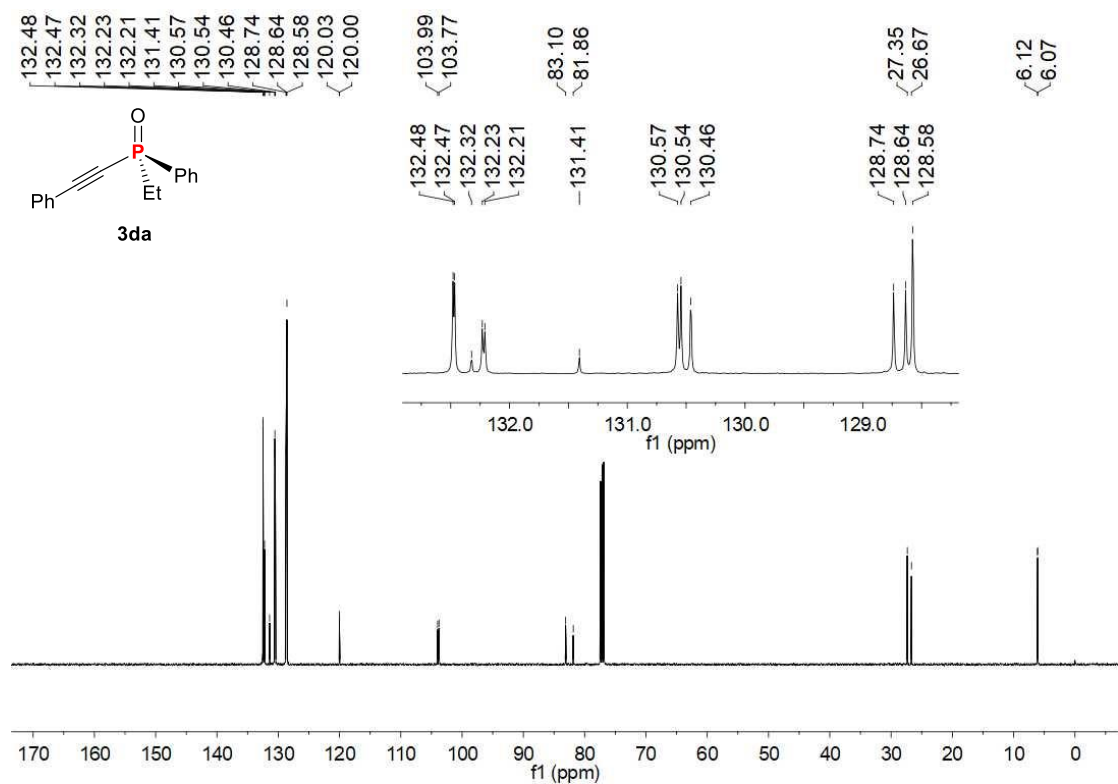

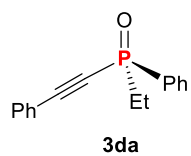

-18.93

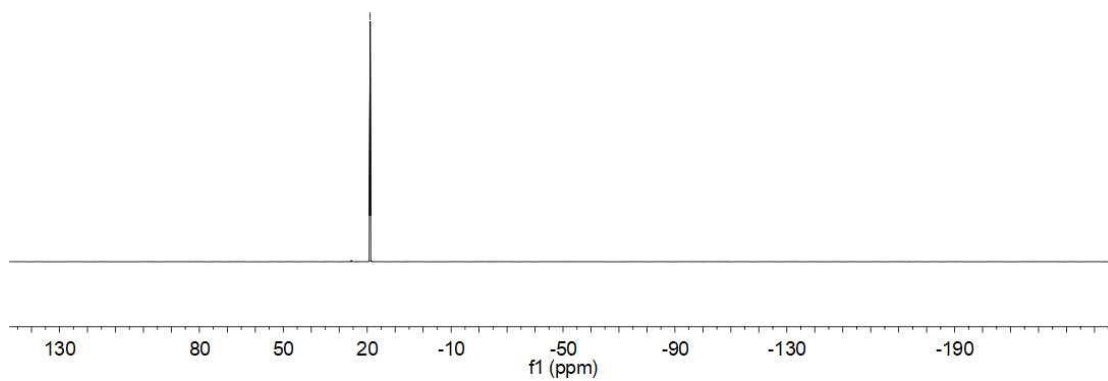

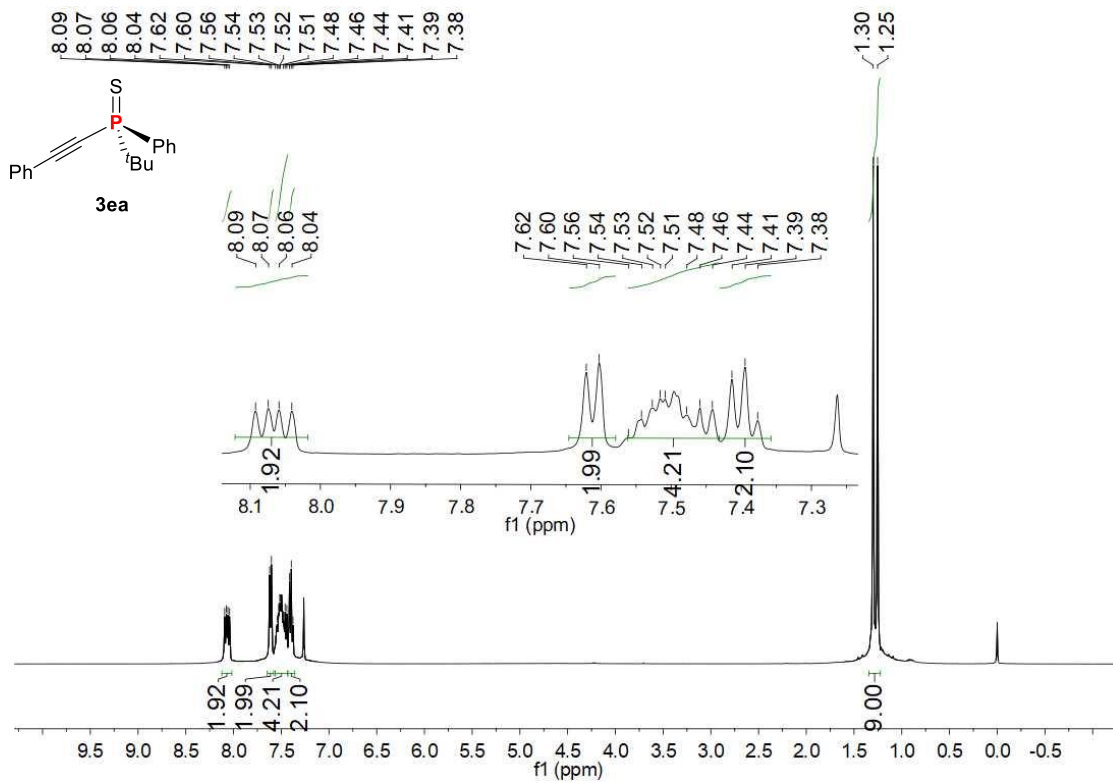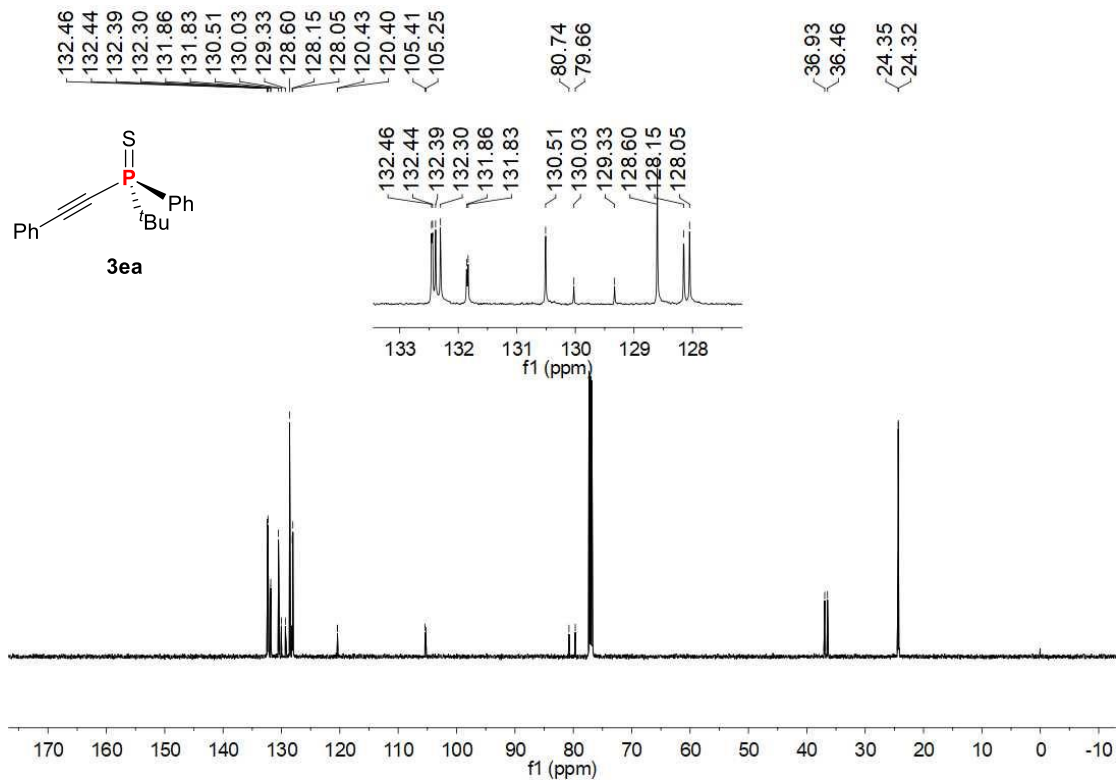

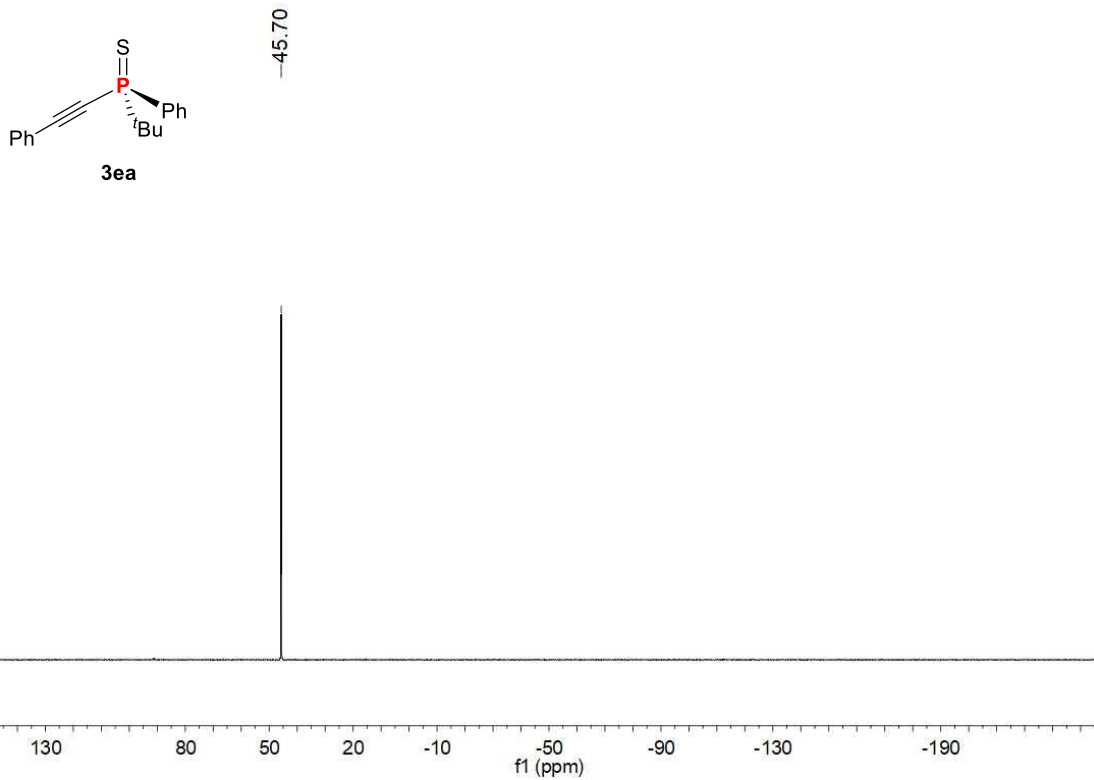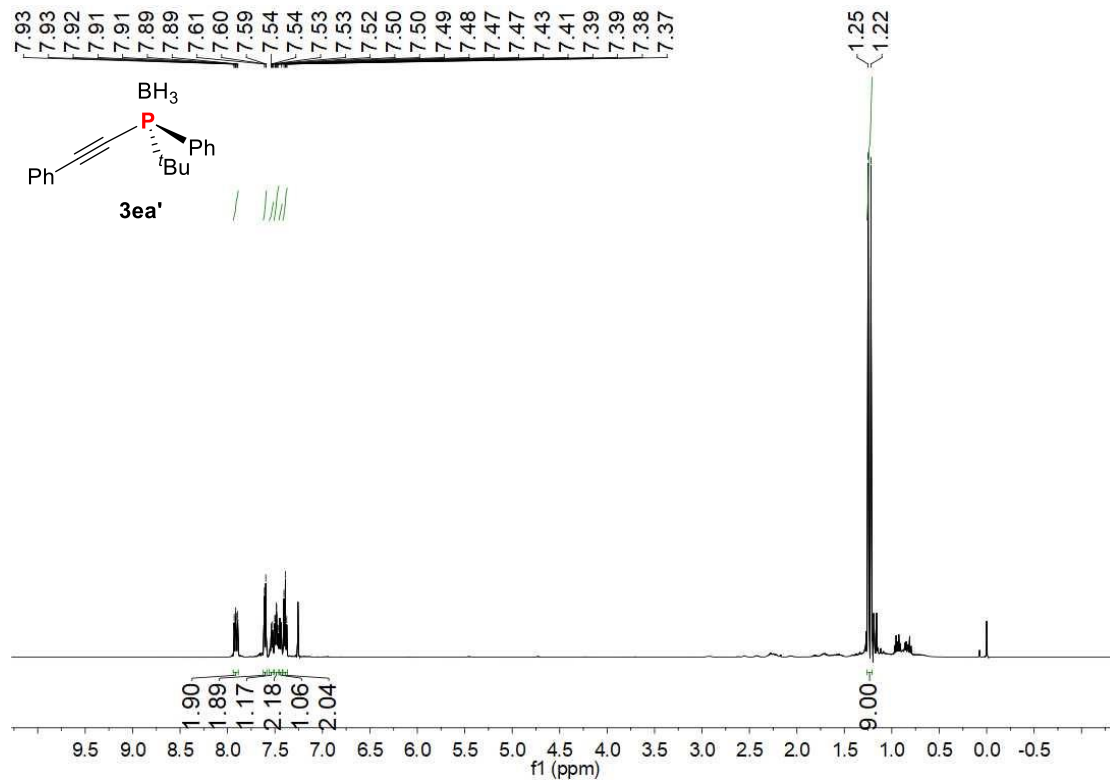

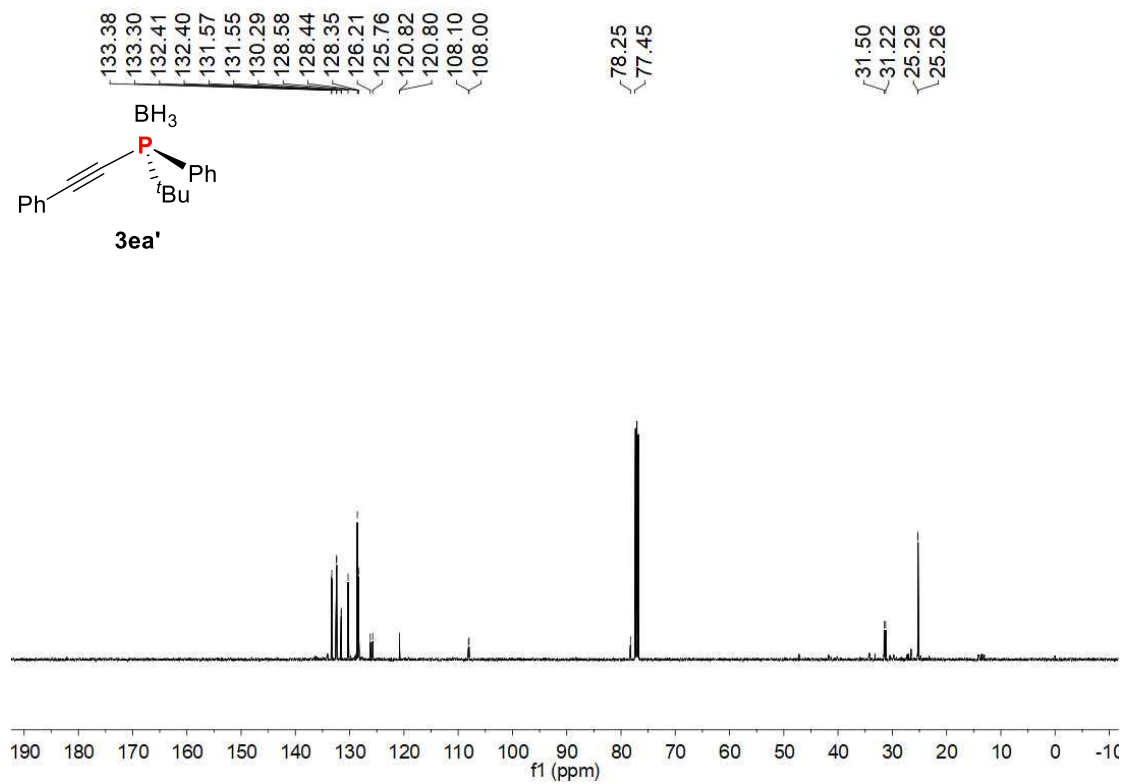

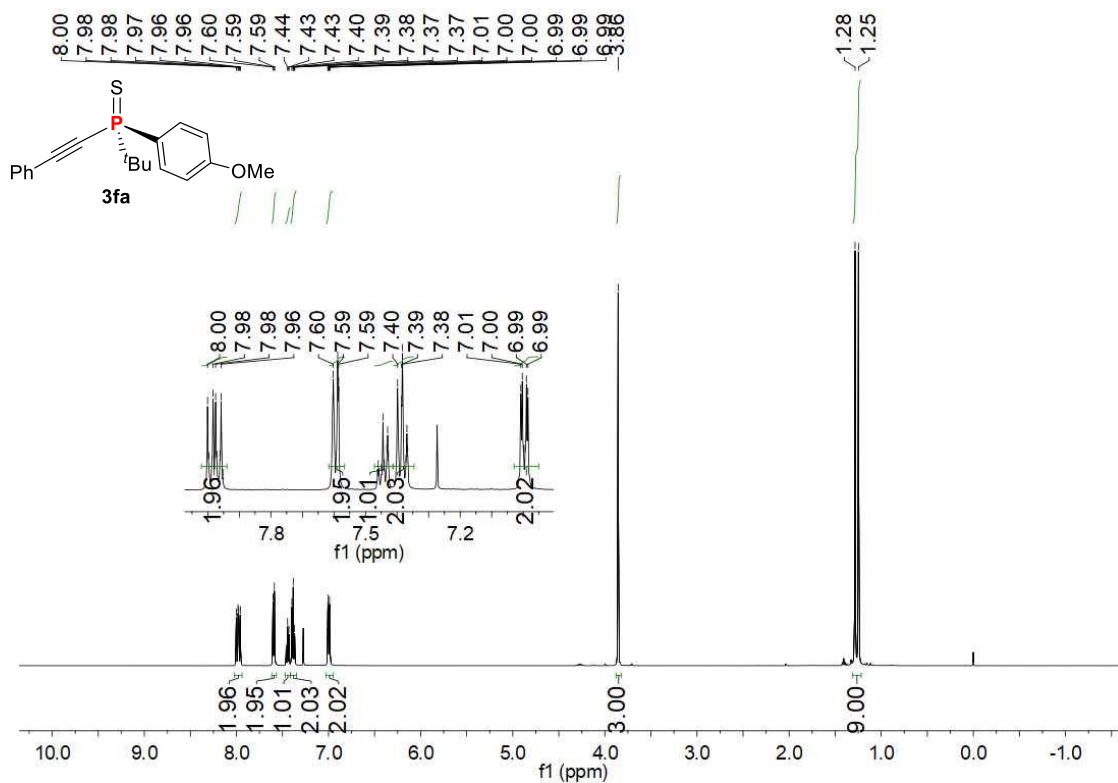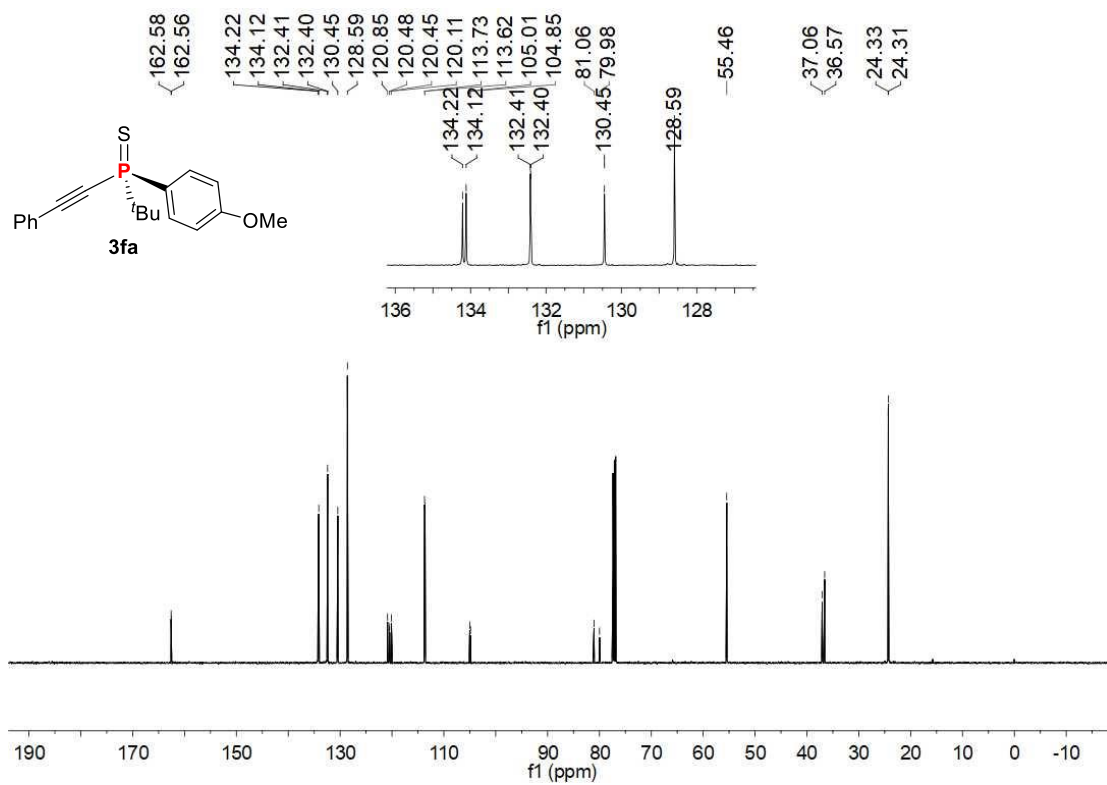



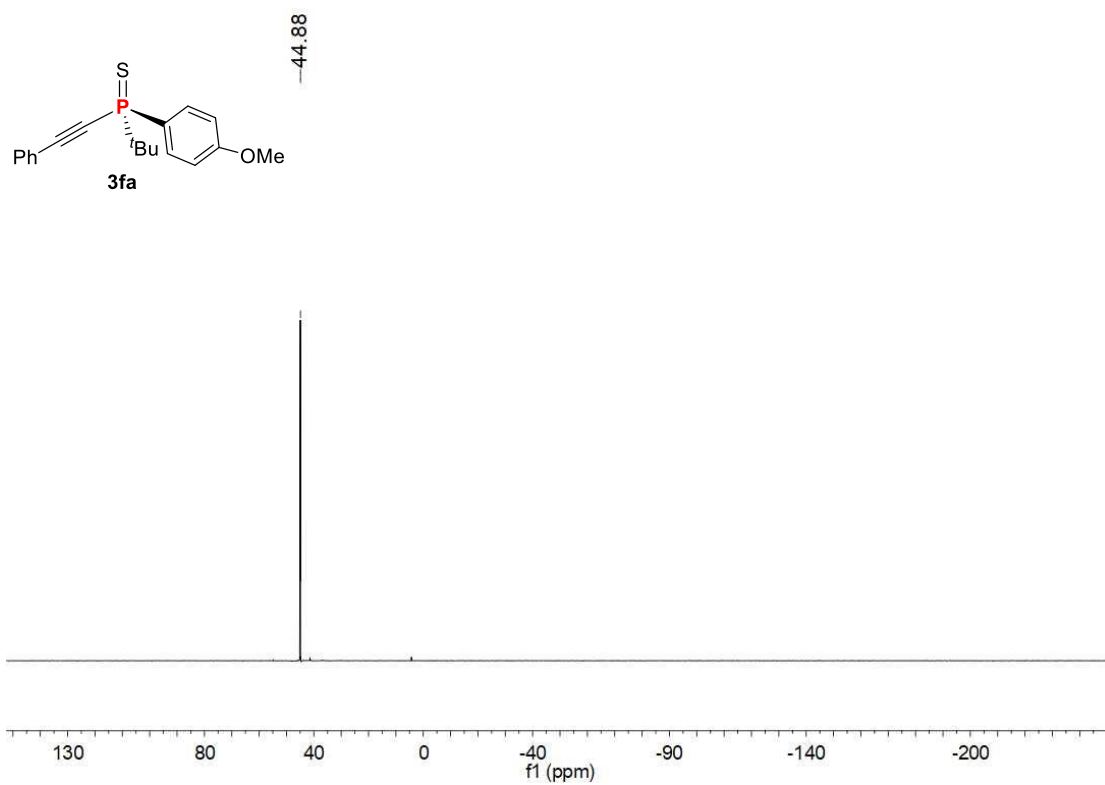

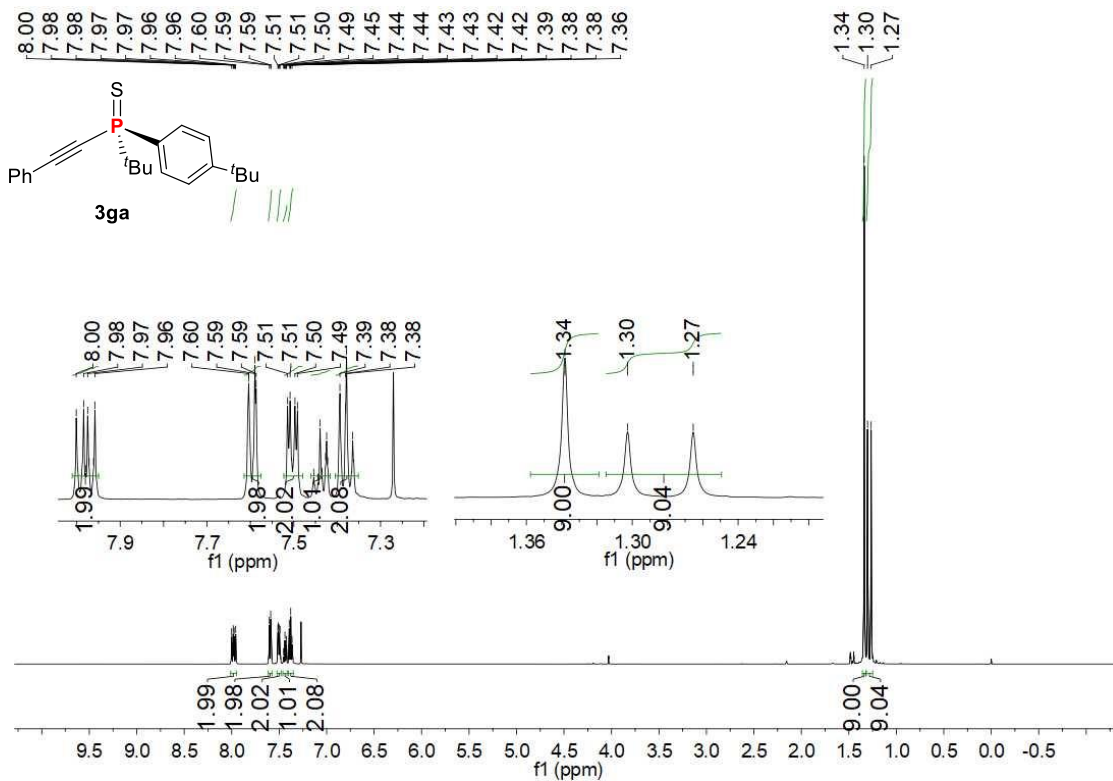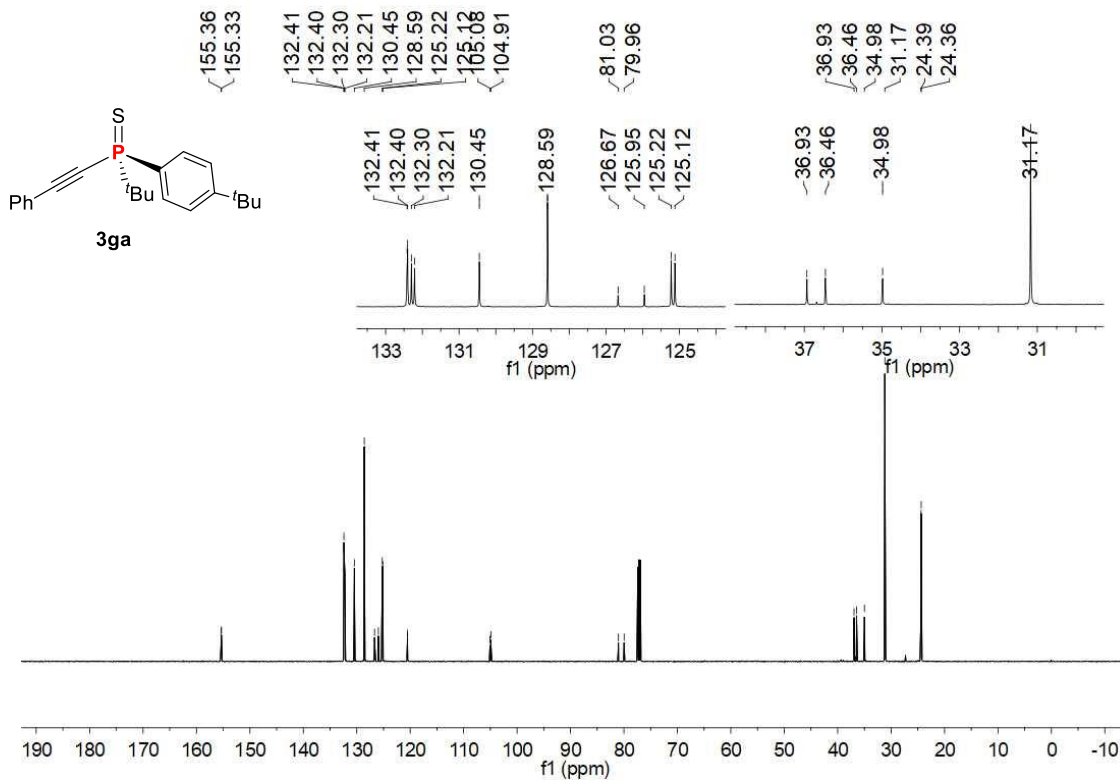

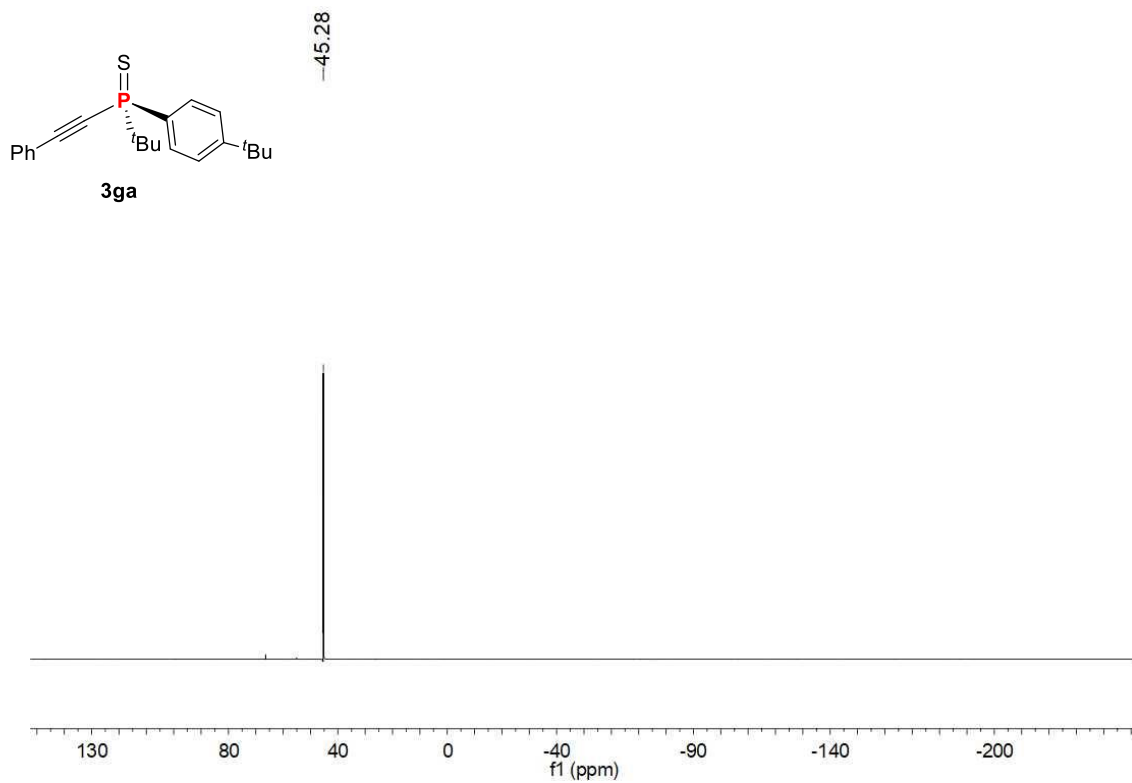

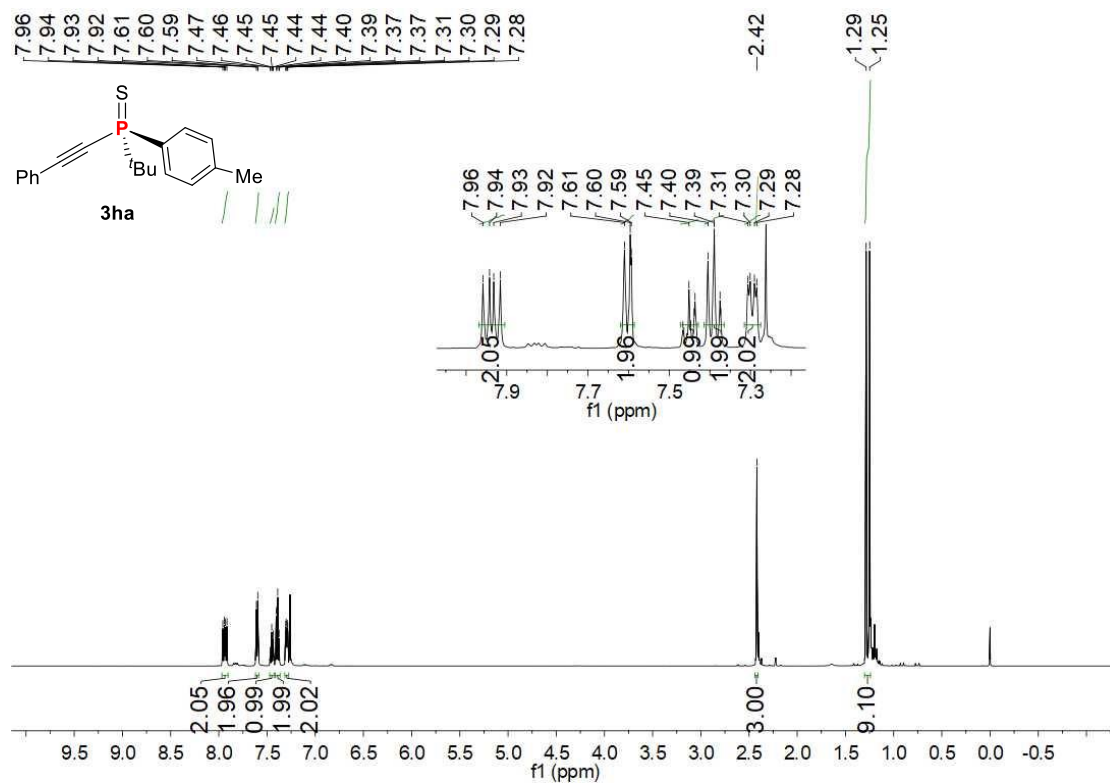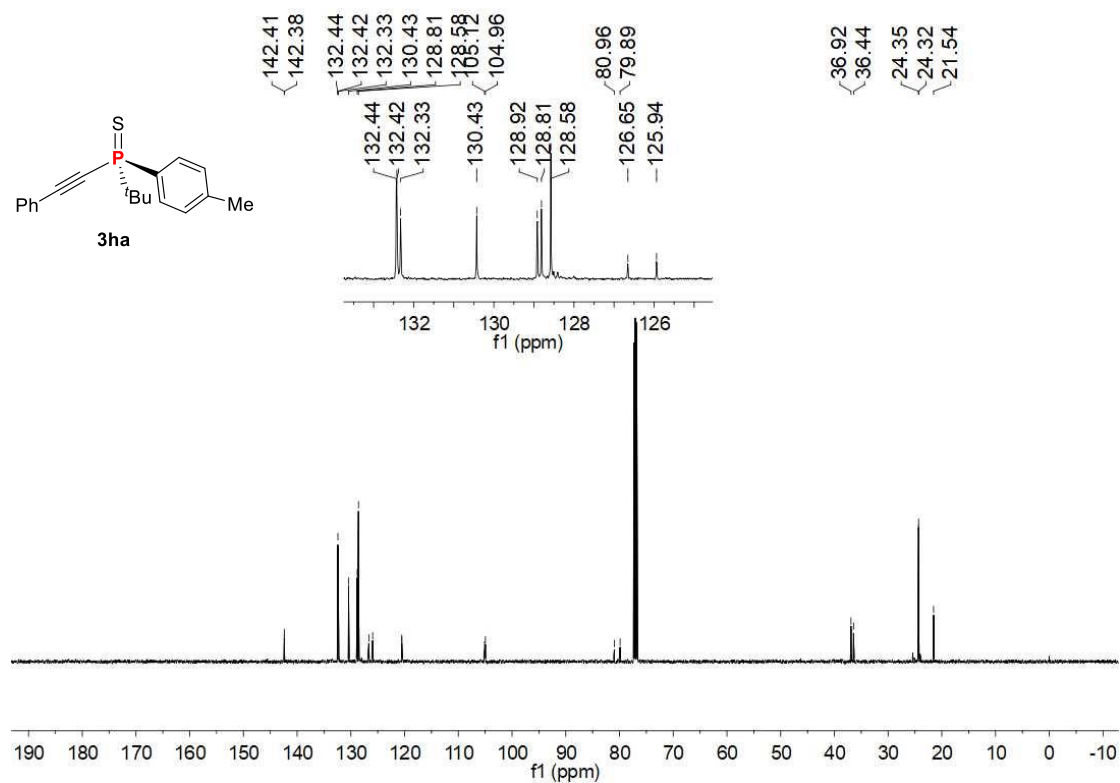

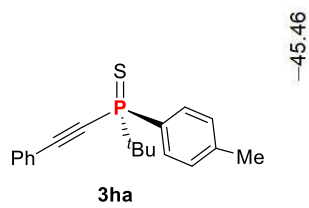

-45.46

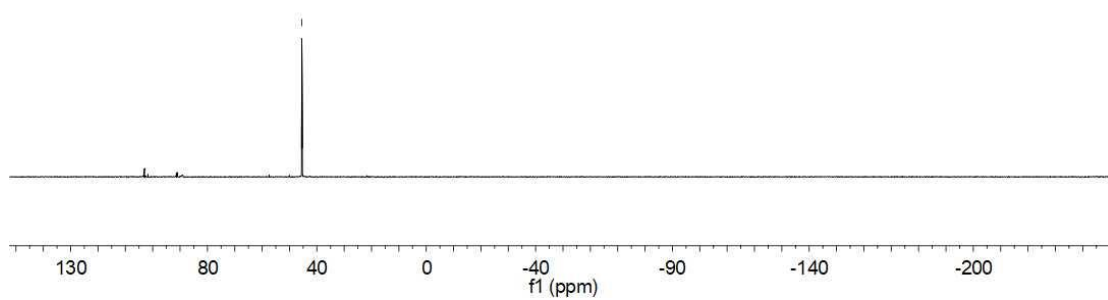

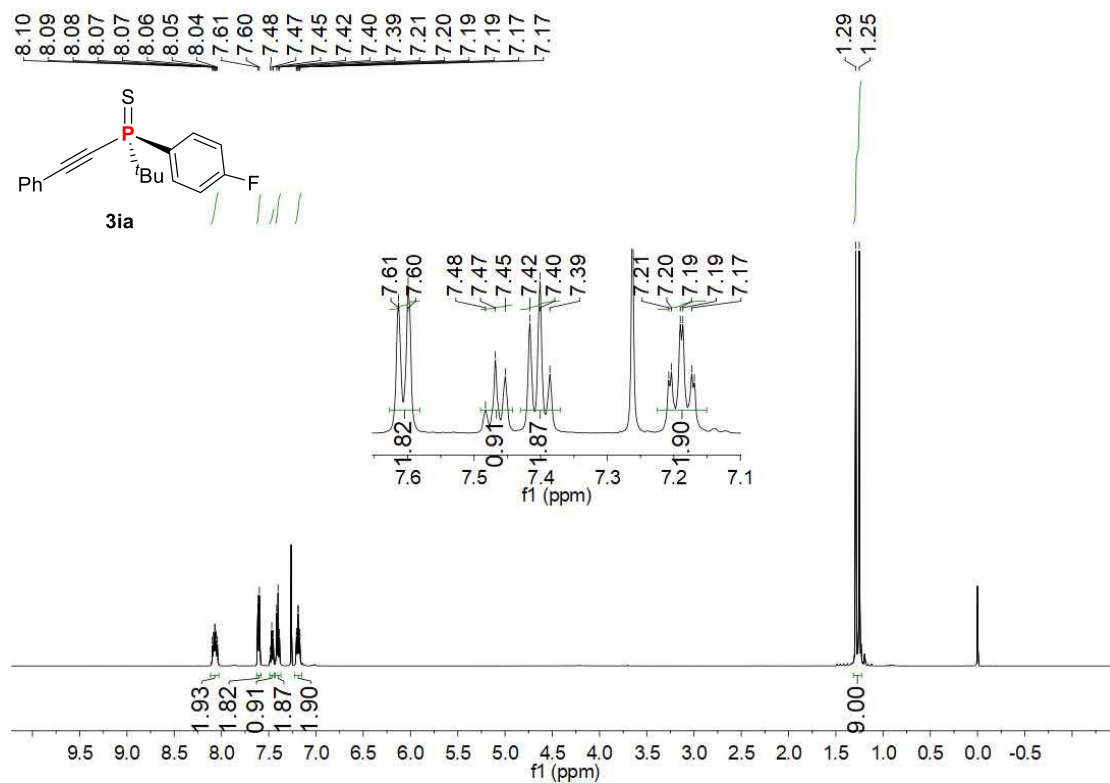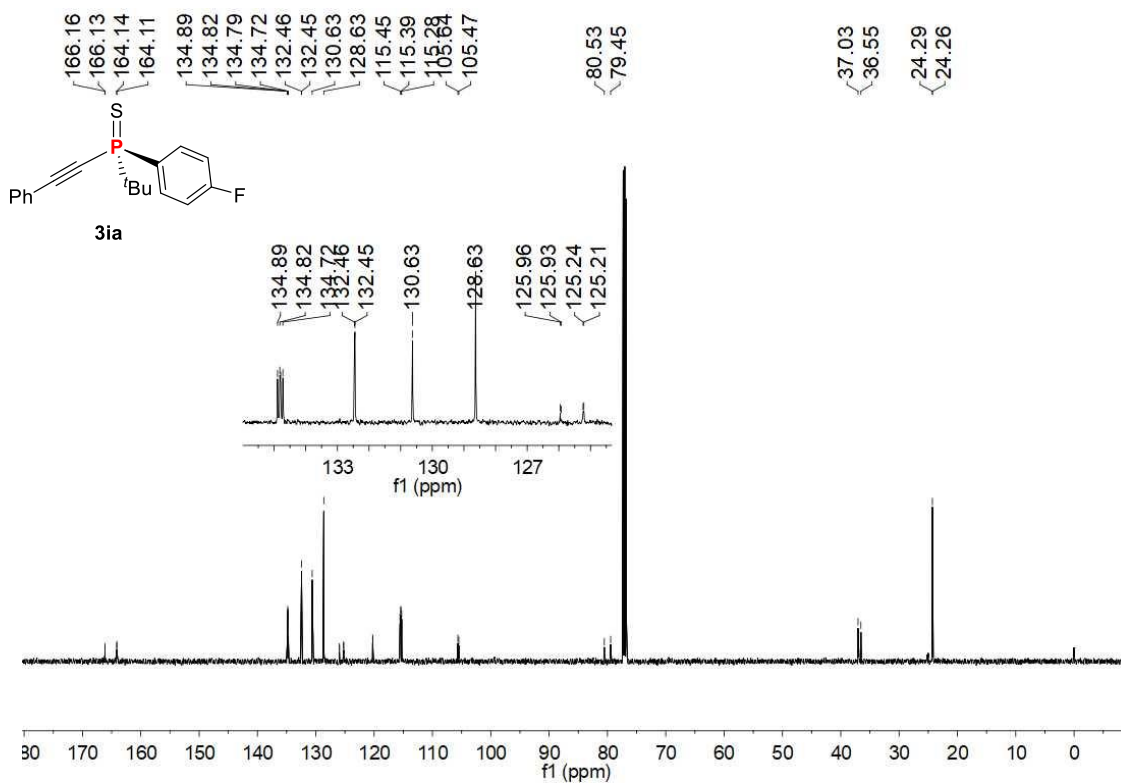

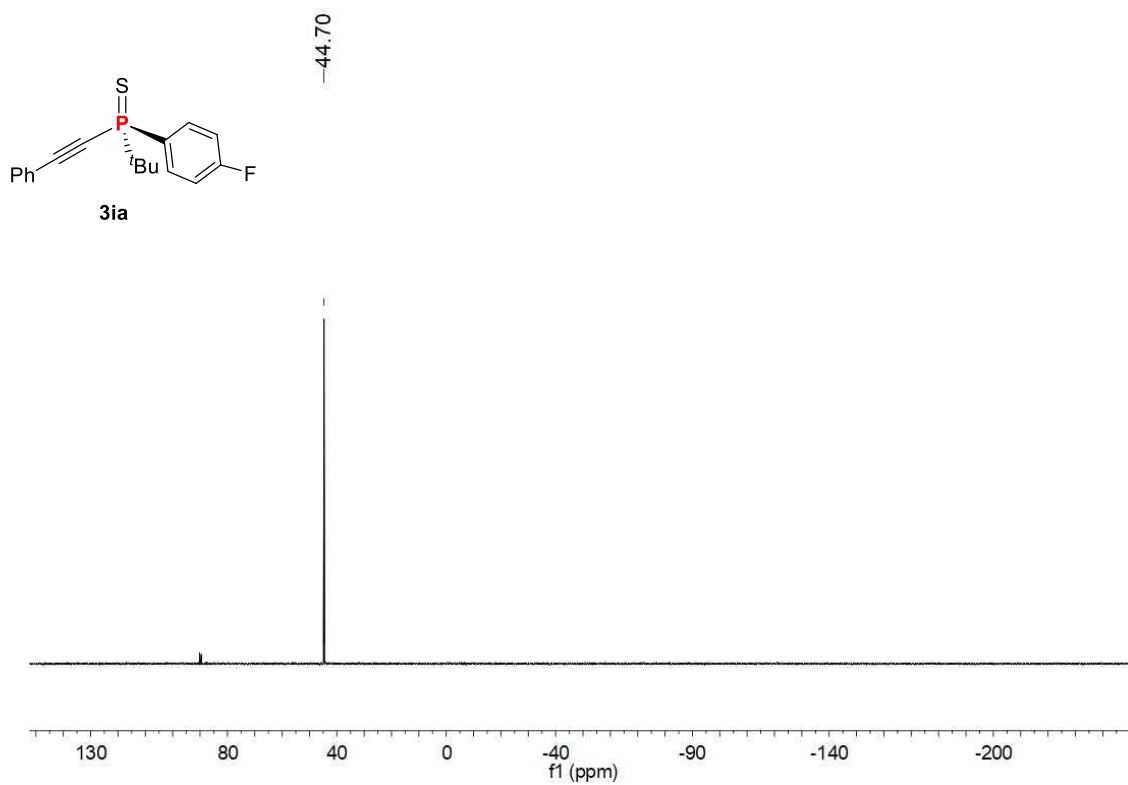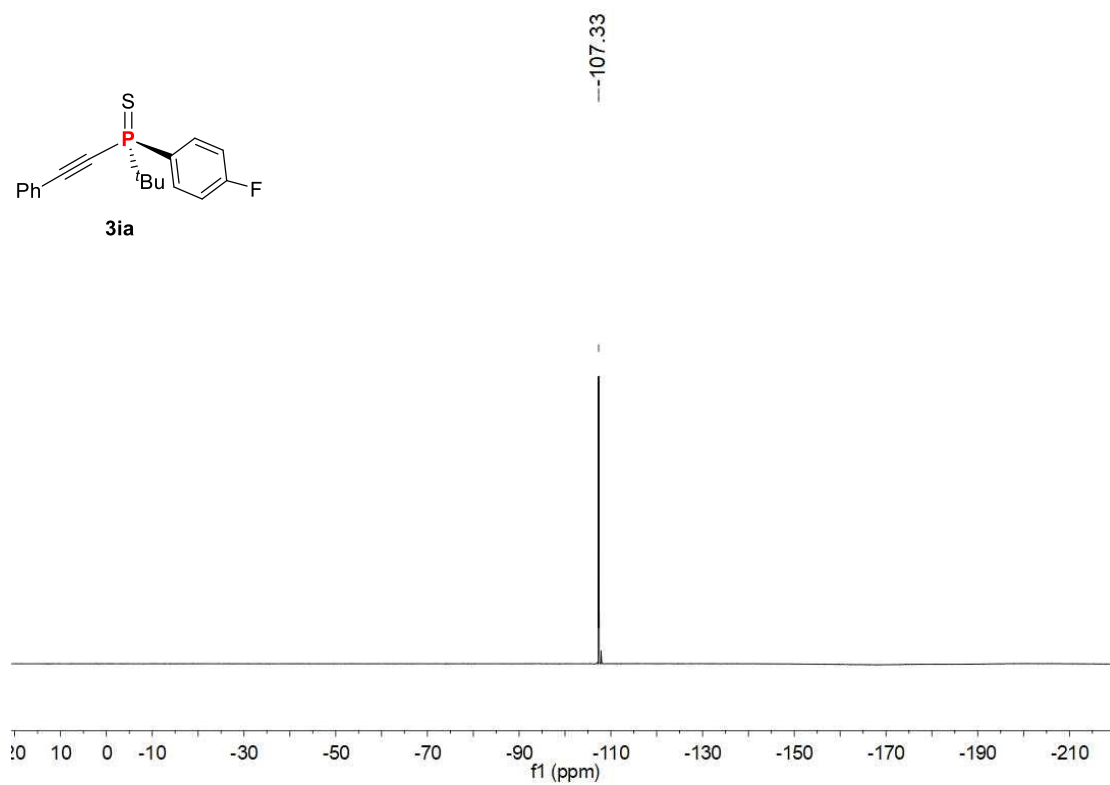

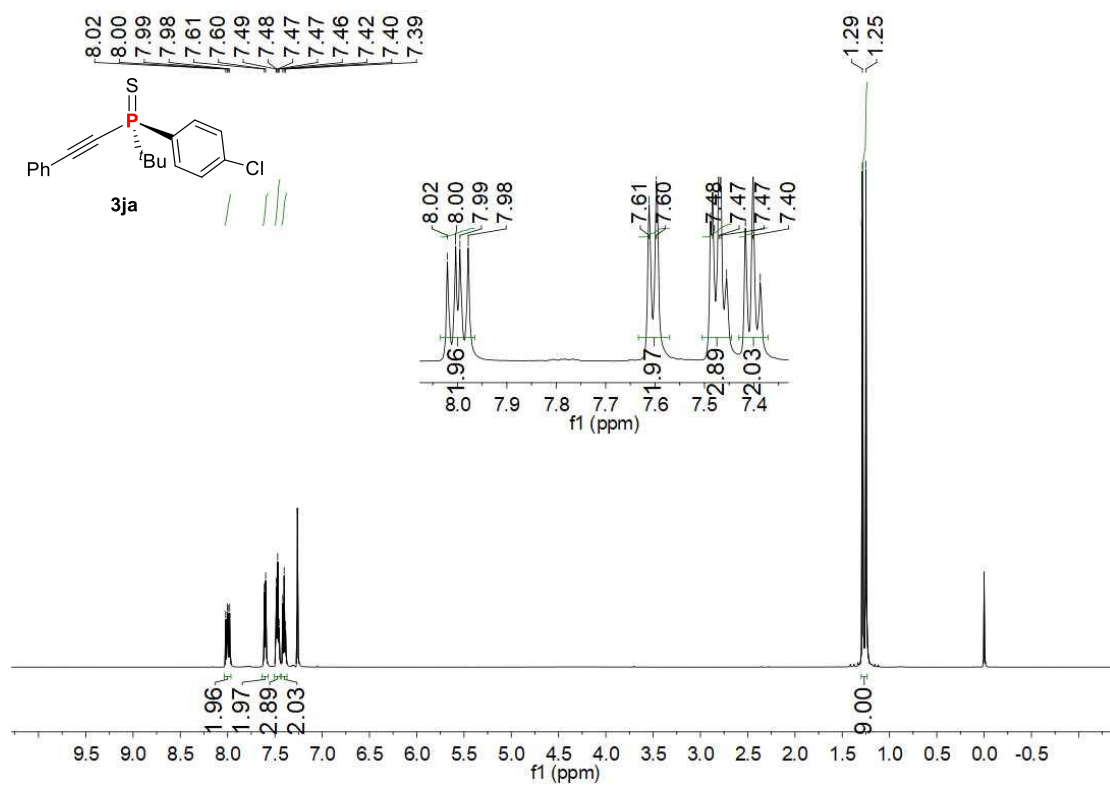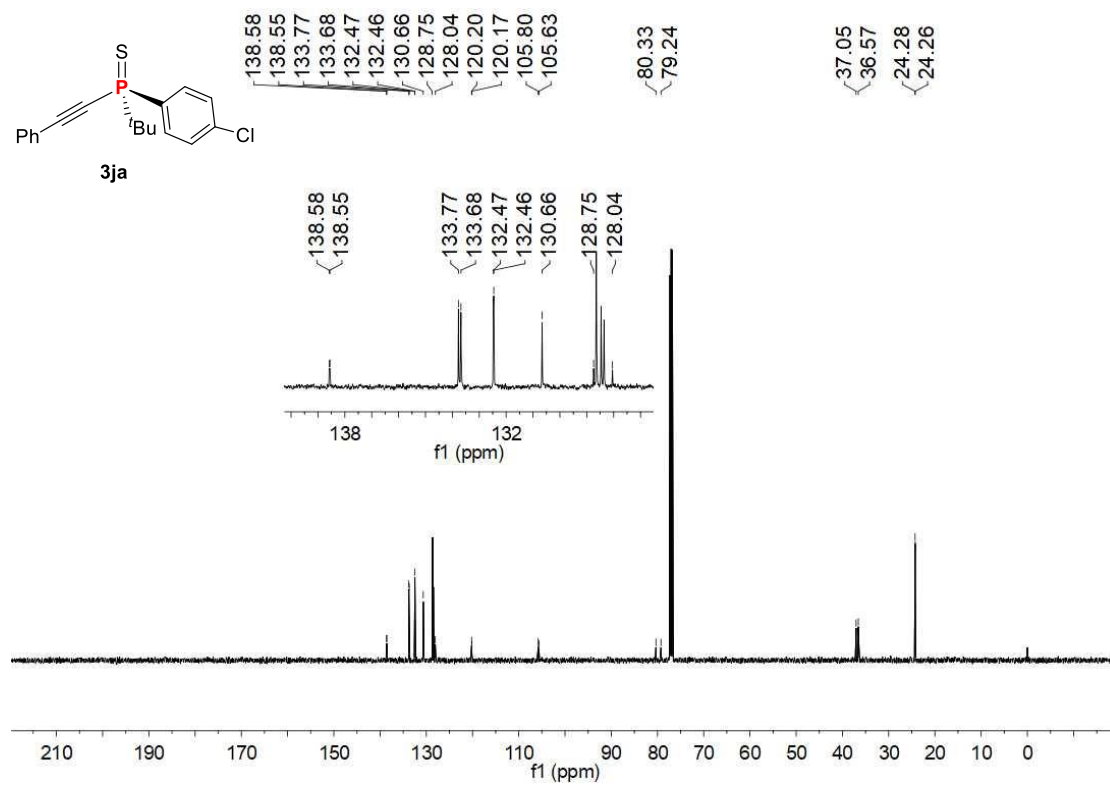



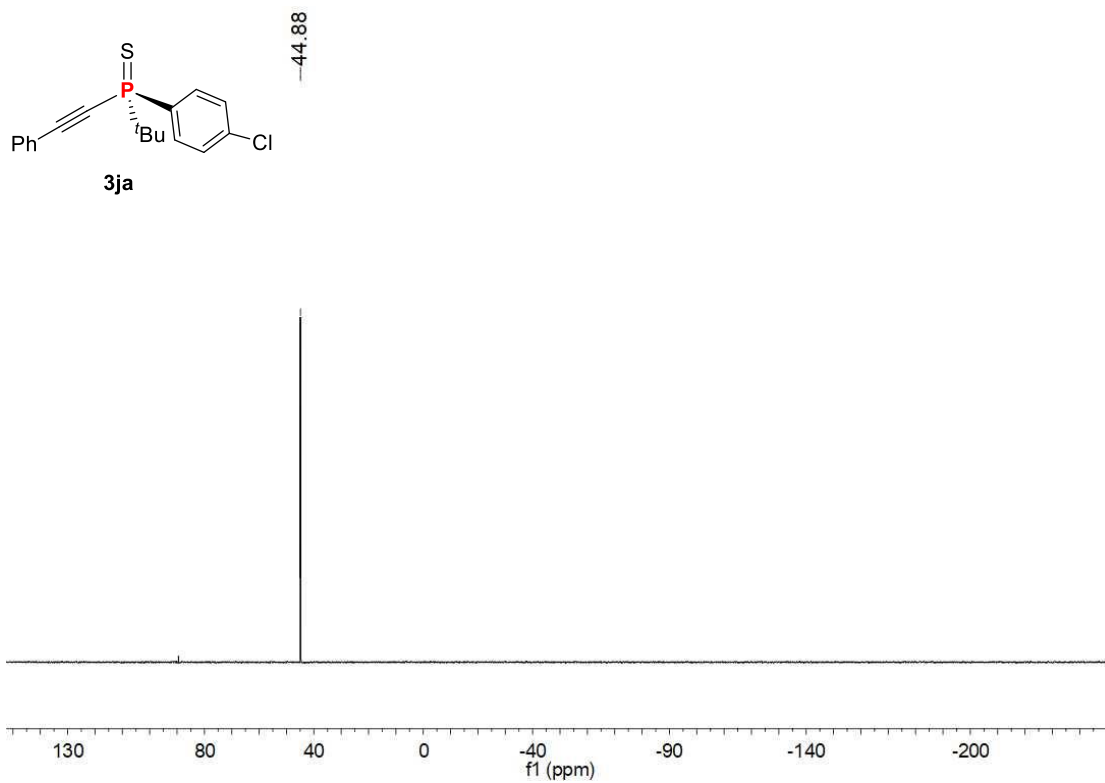

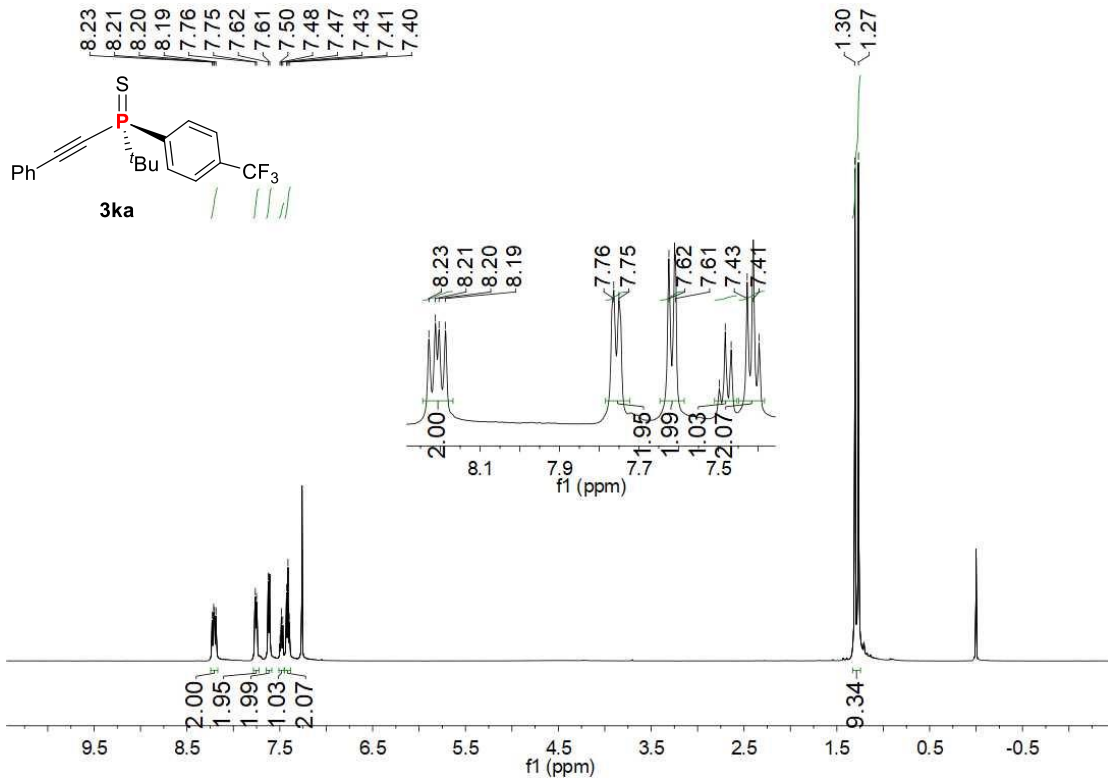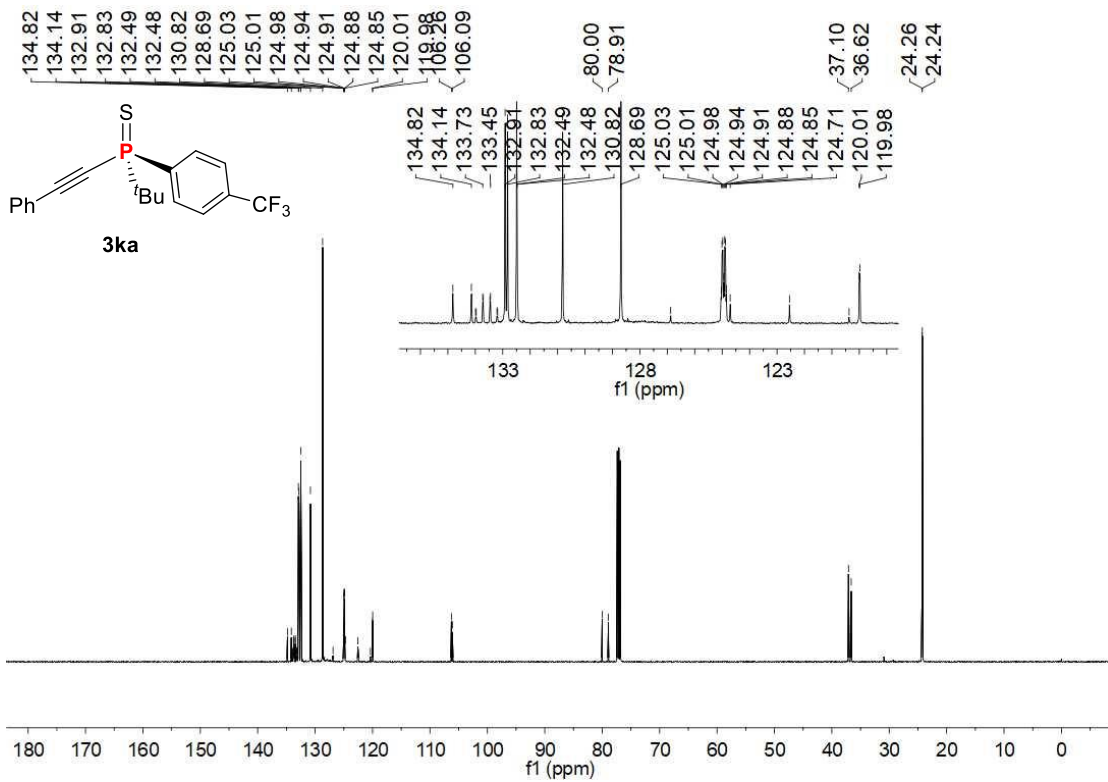

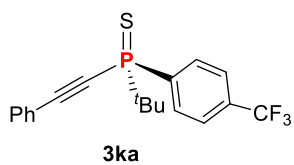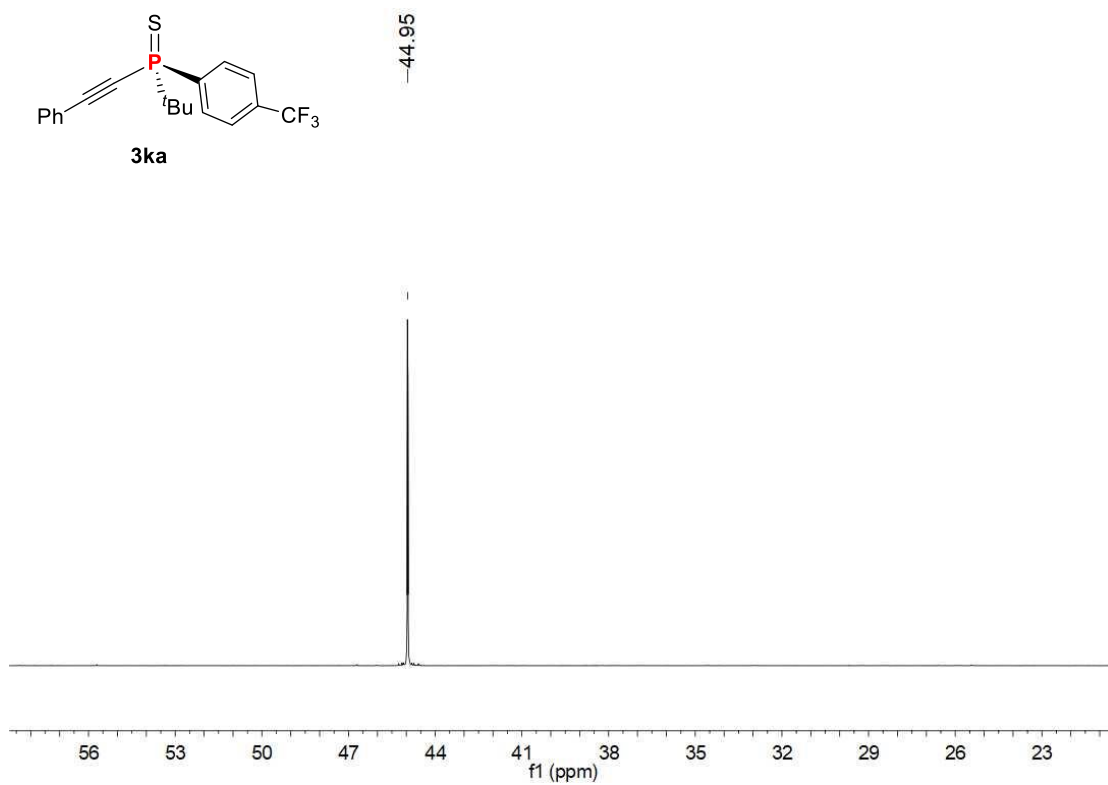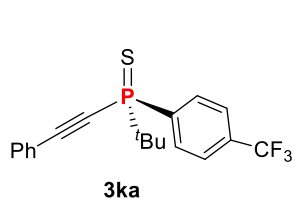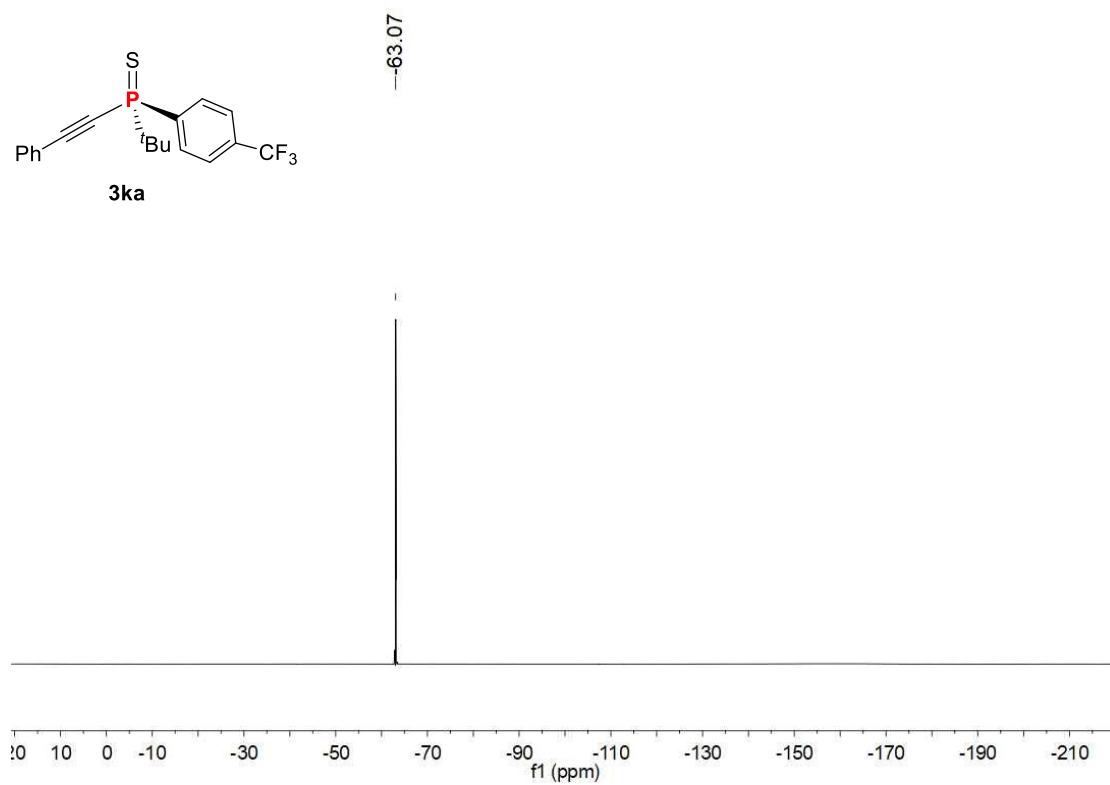

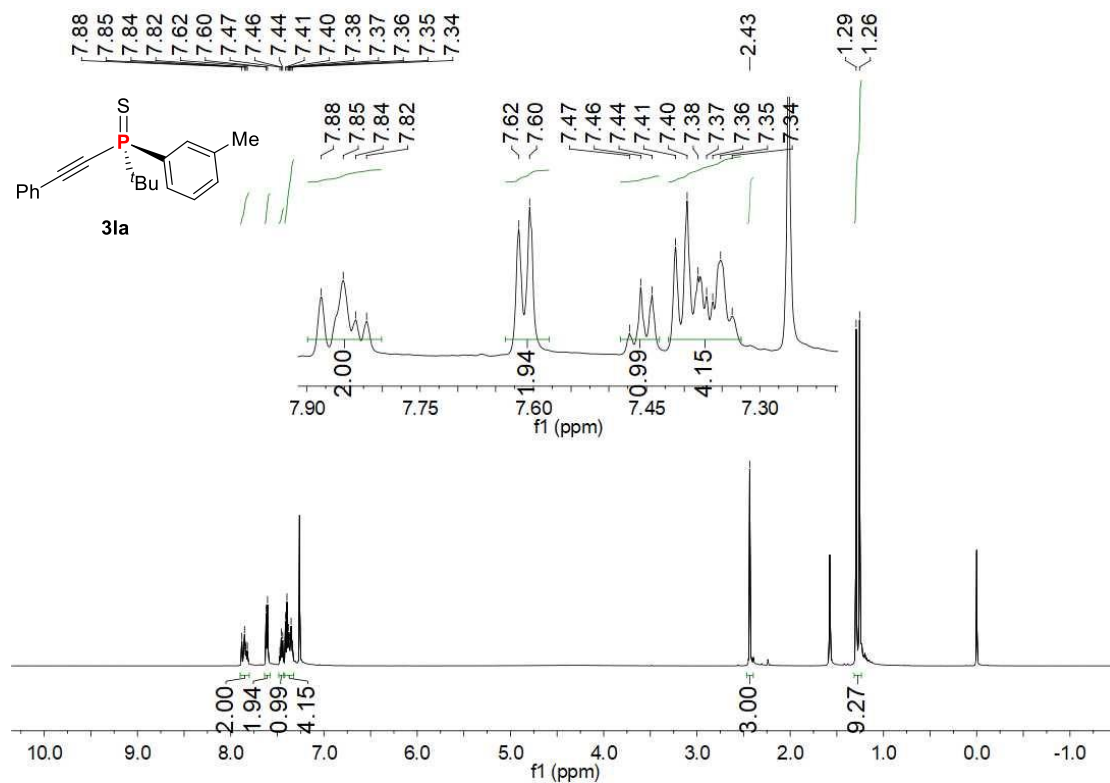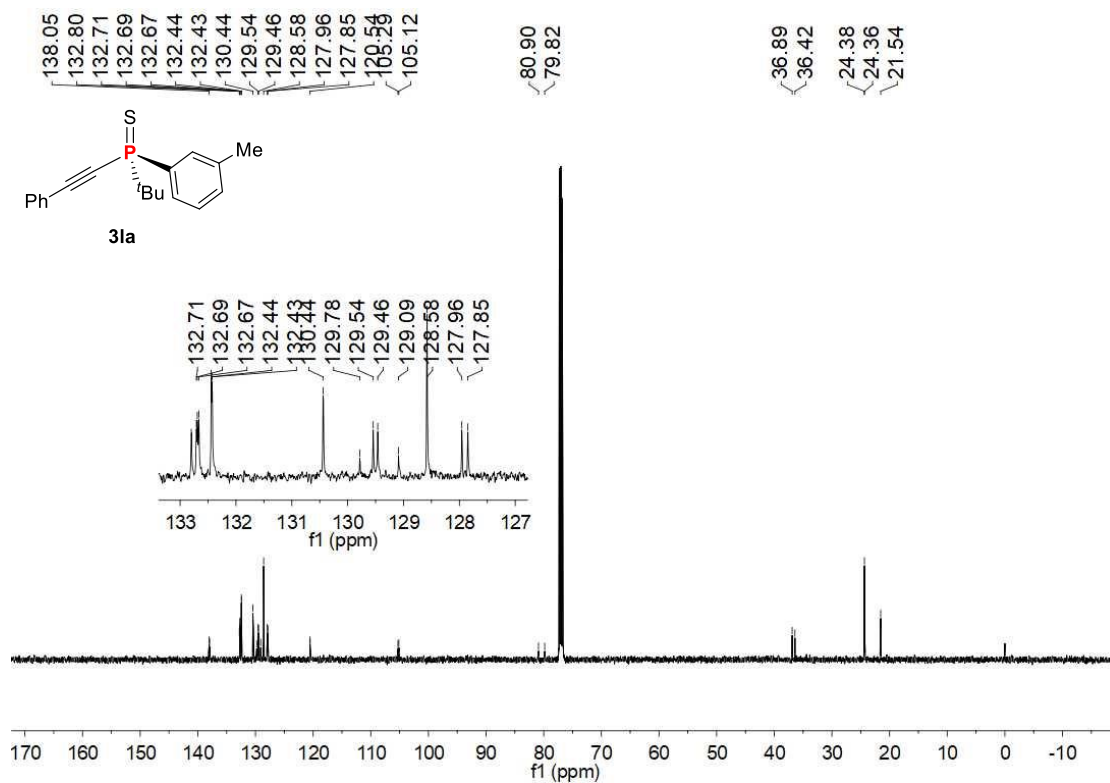

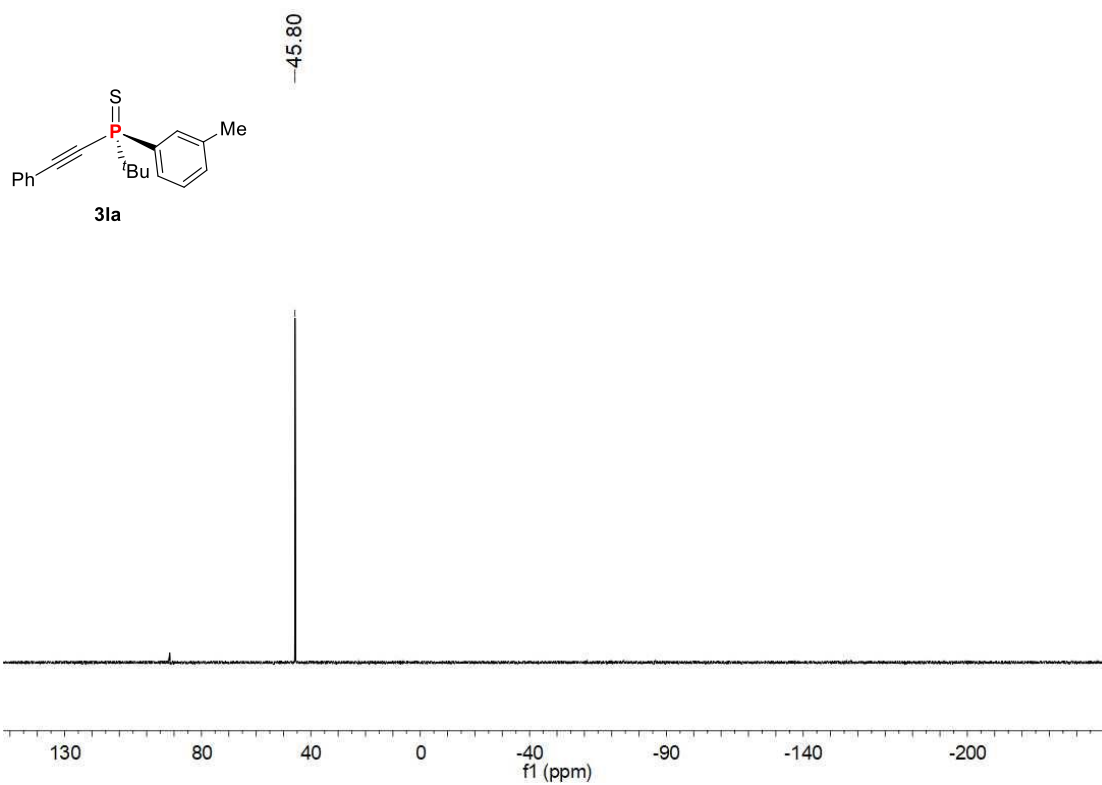

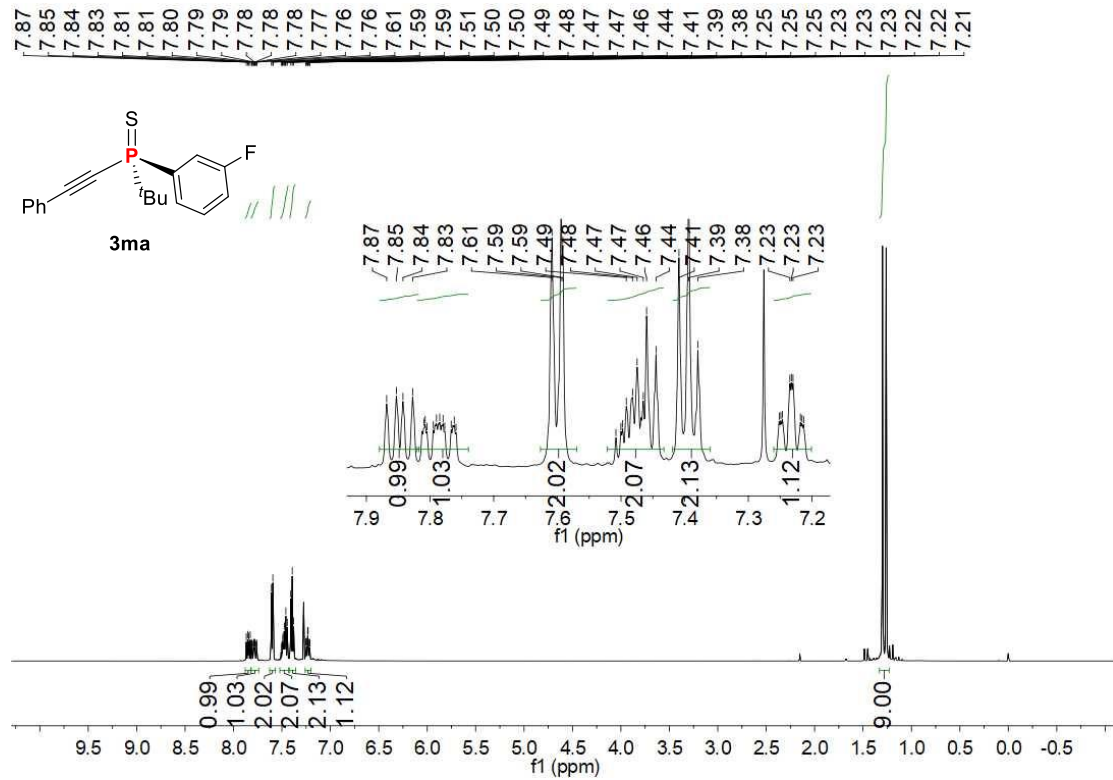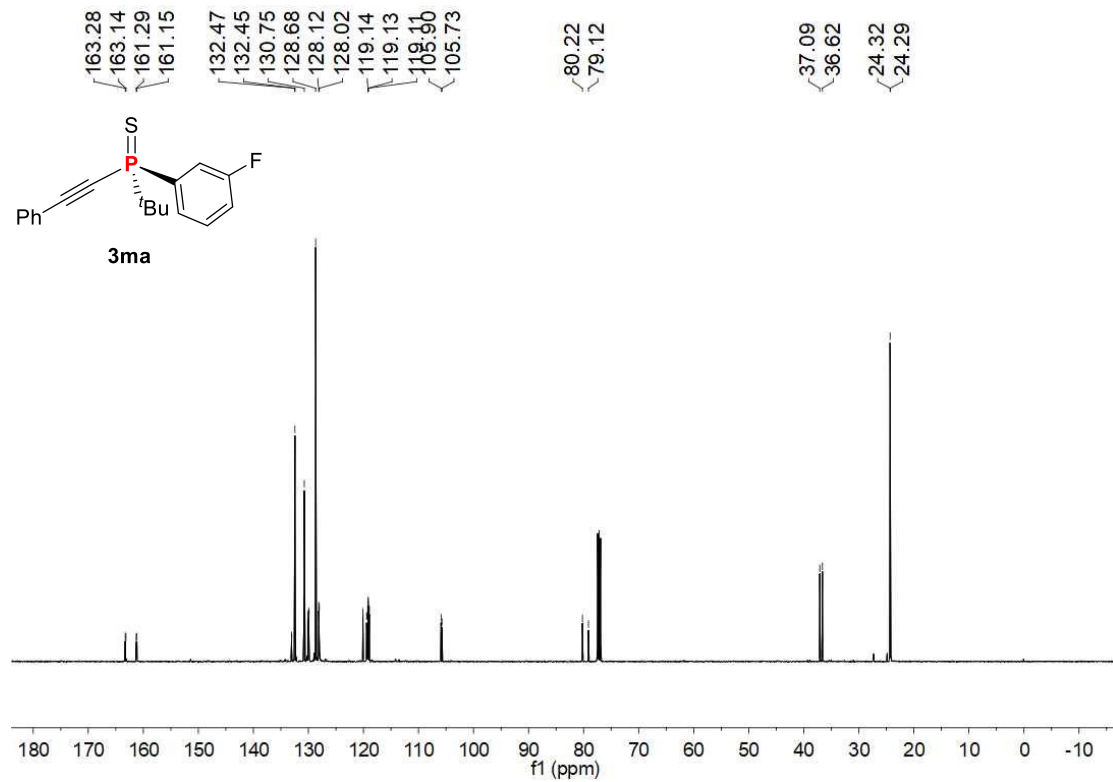

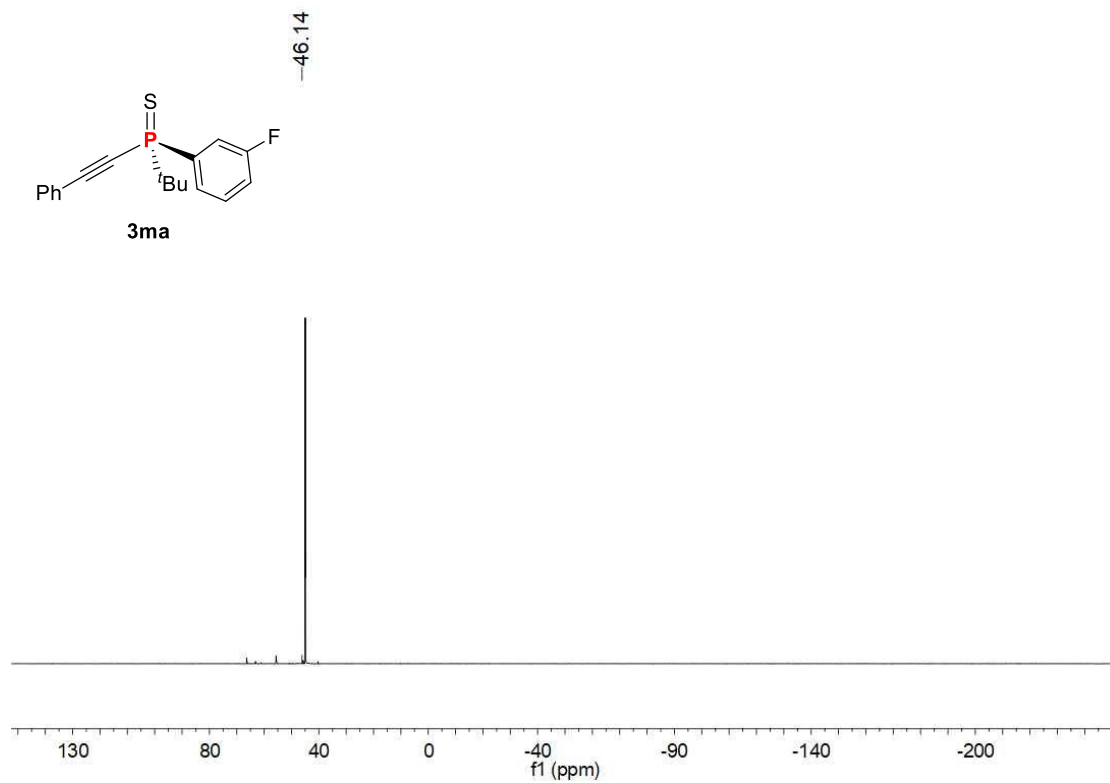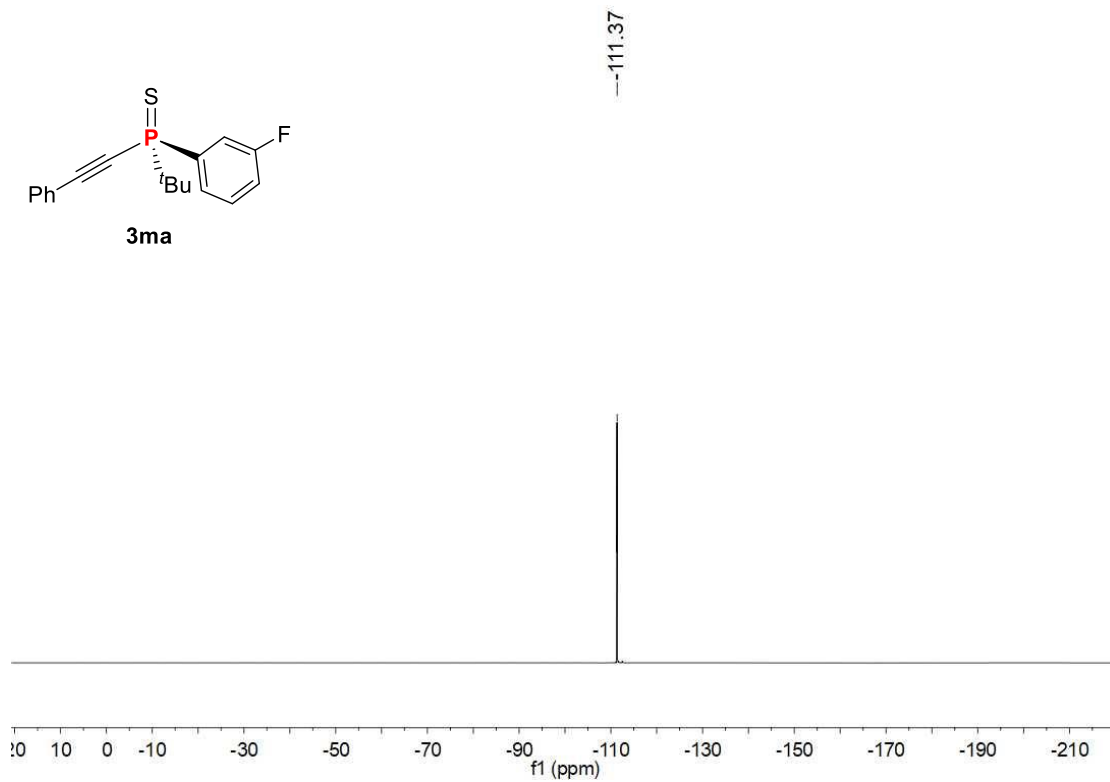

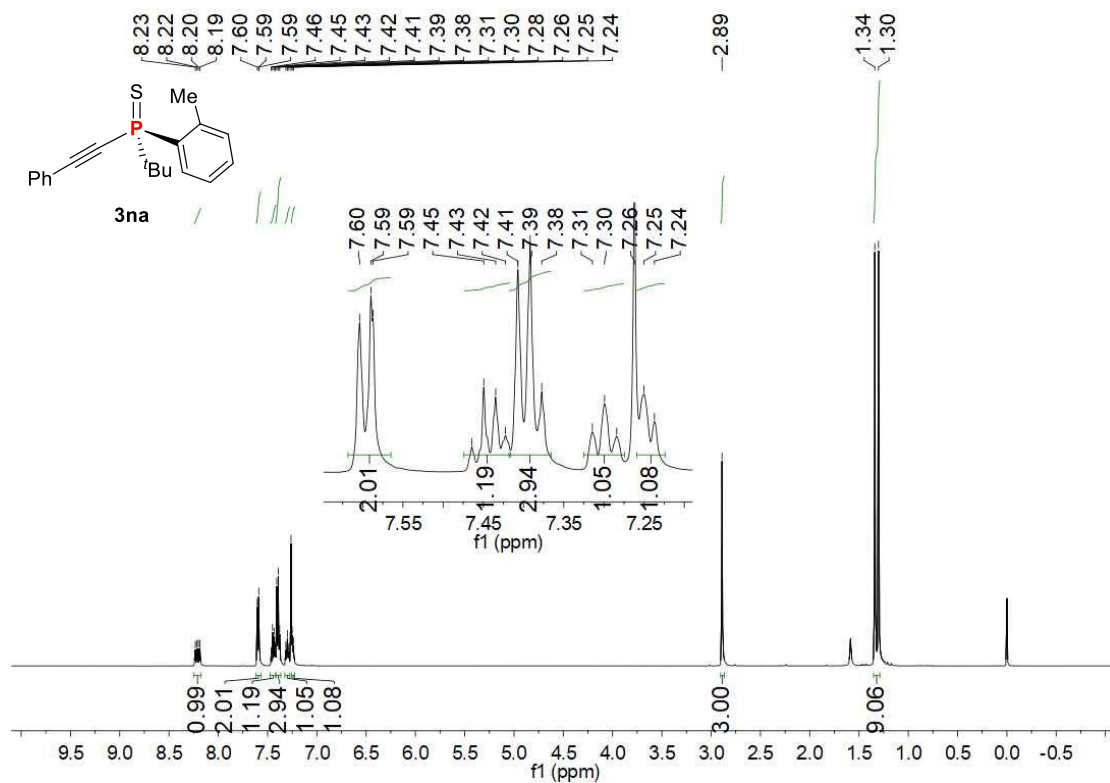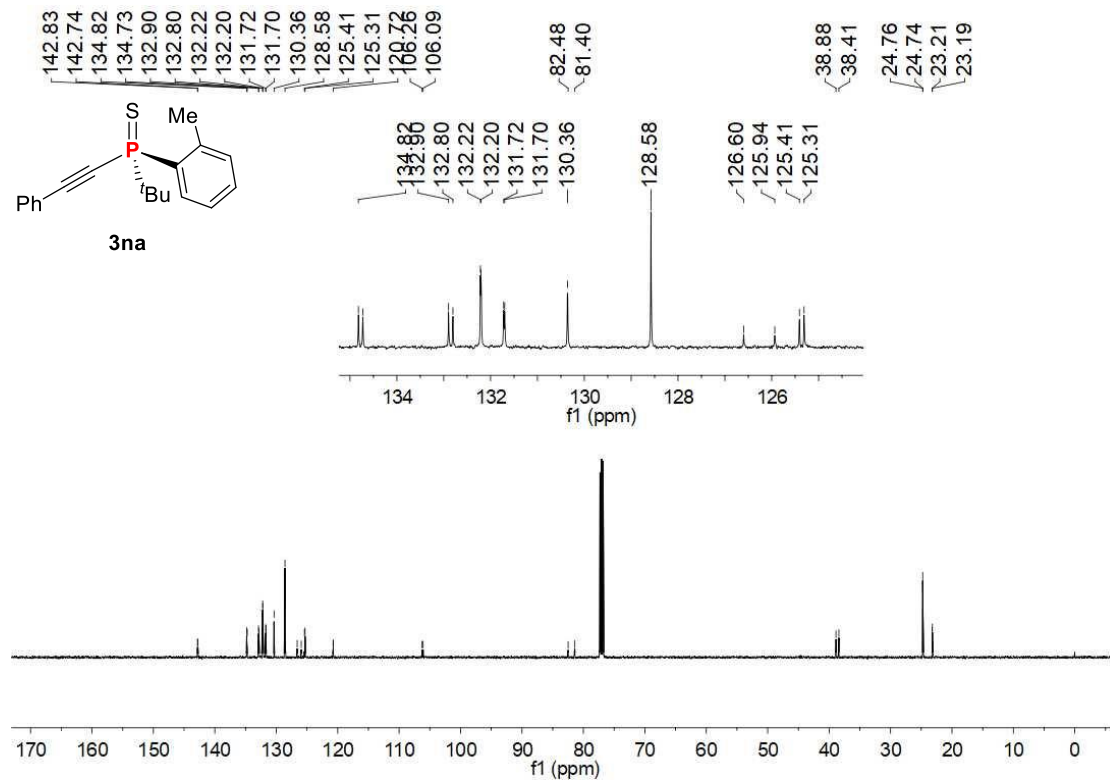



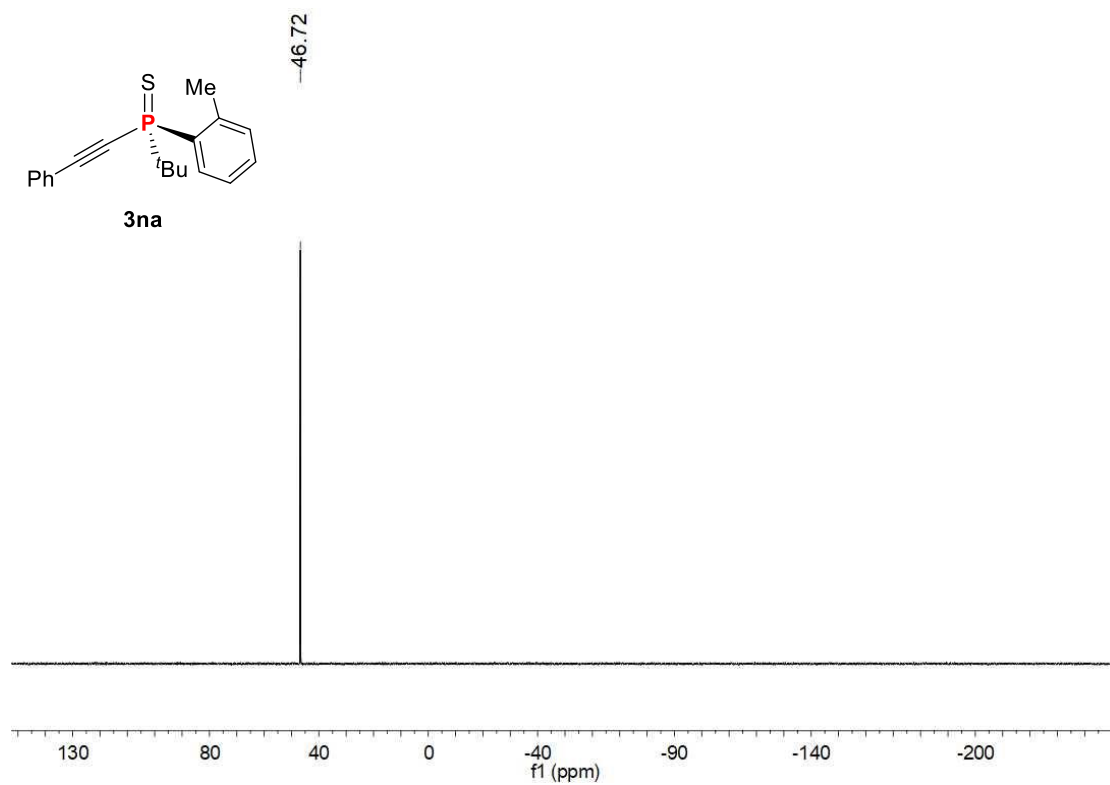

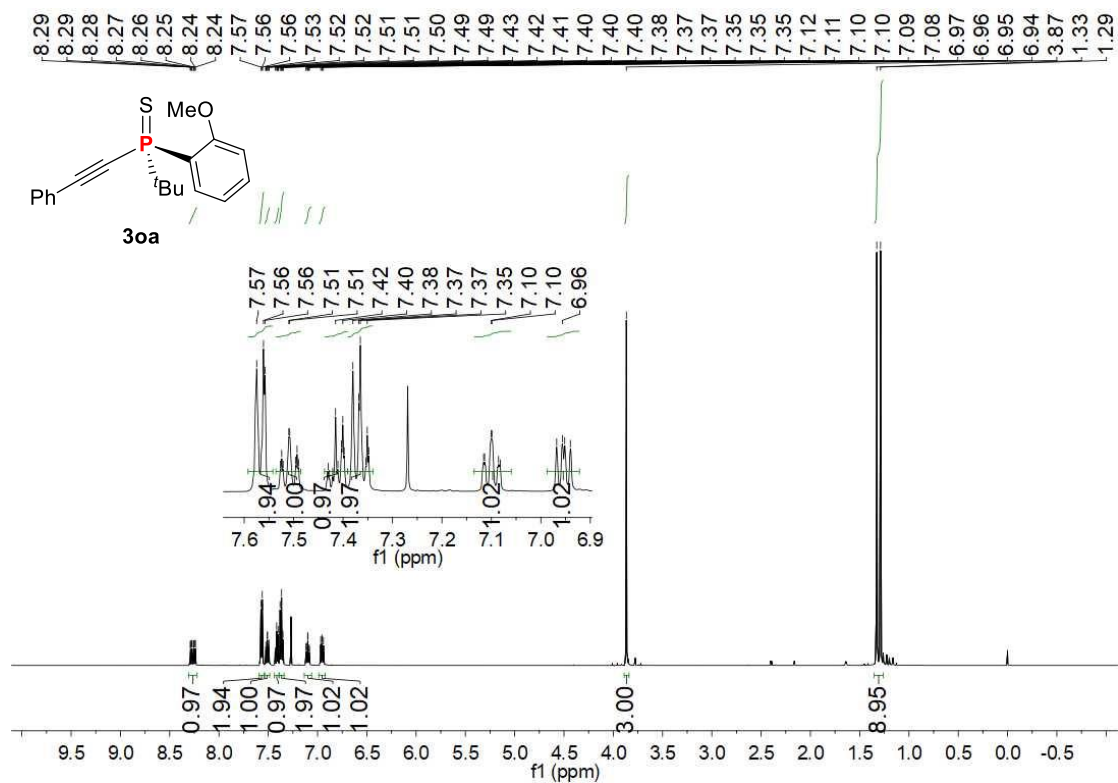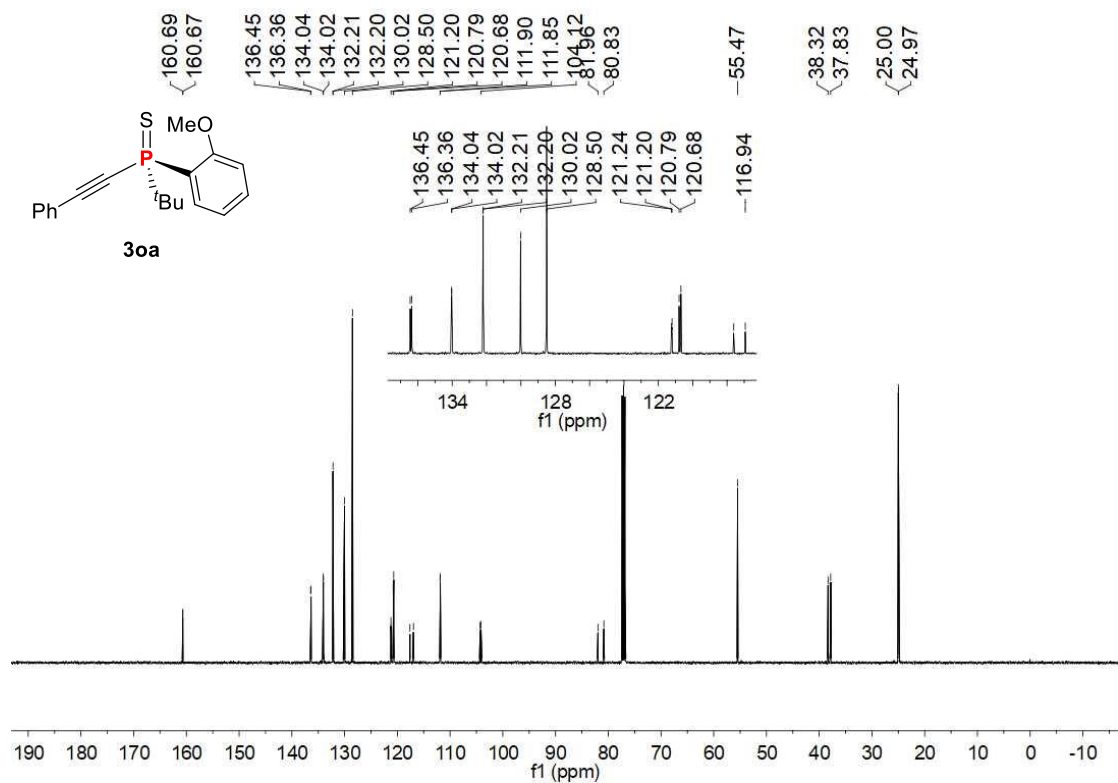

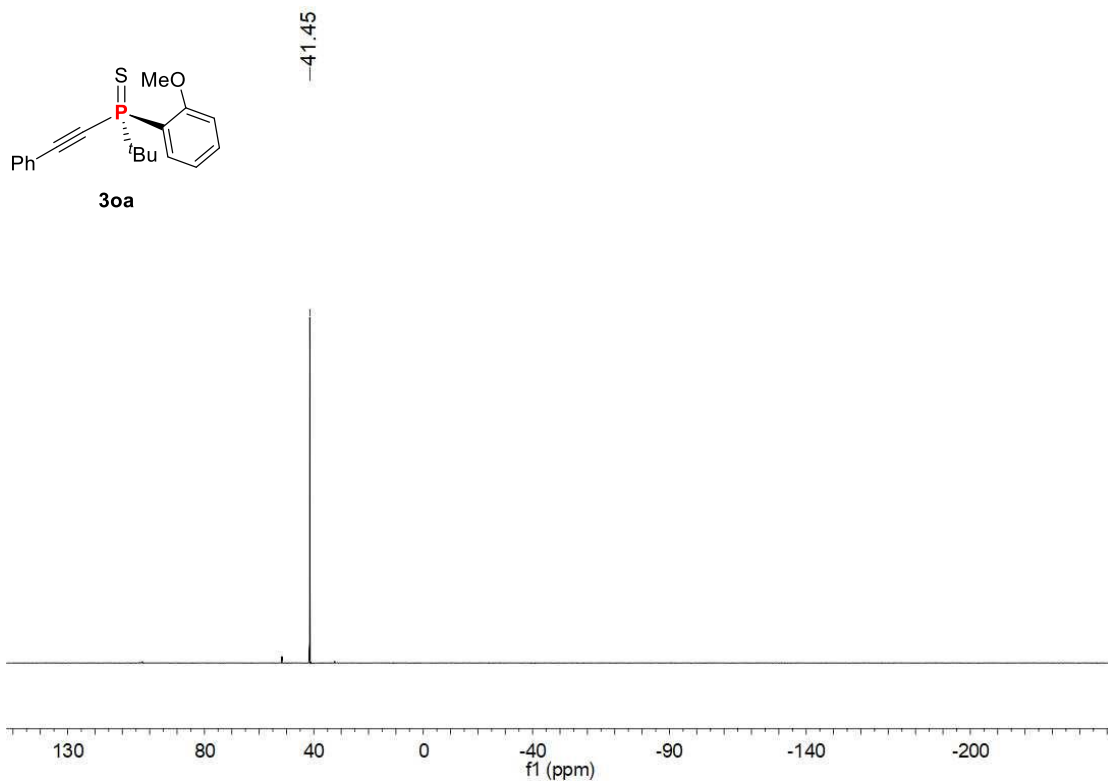

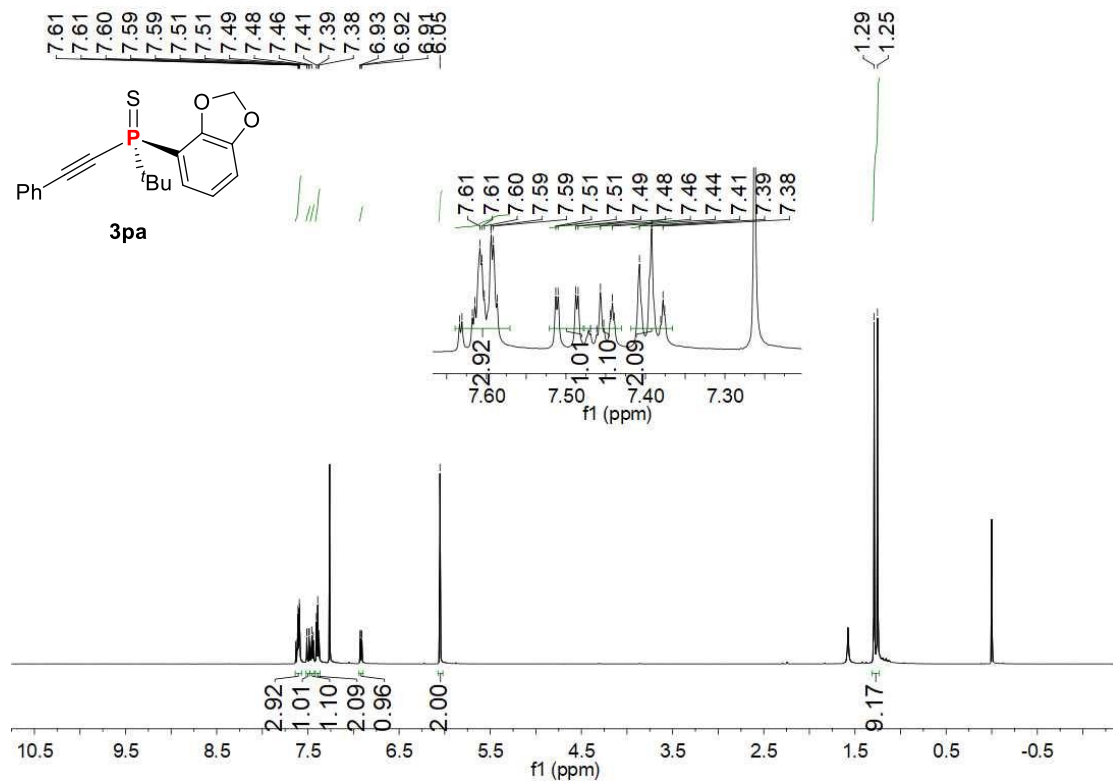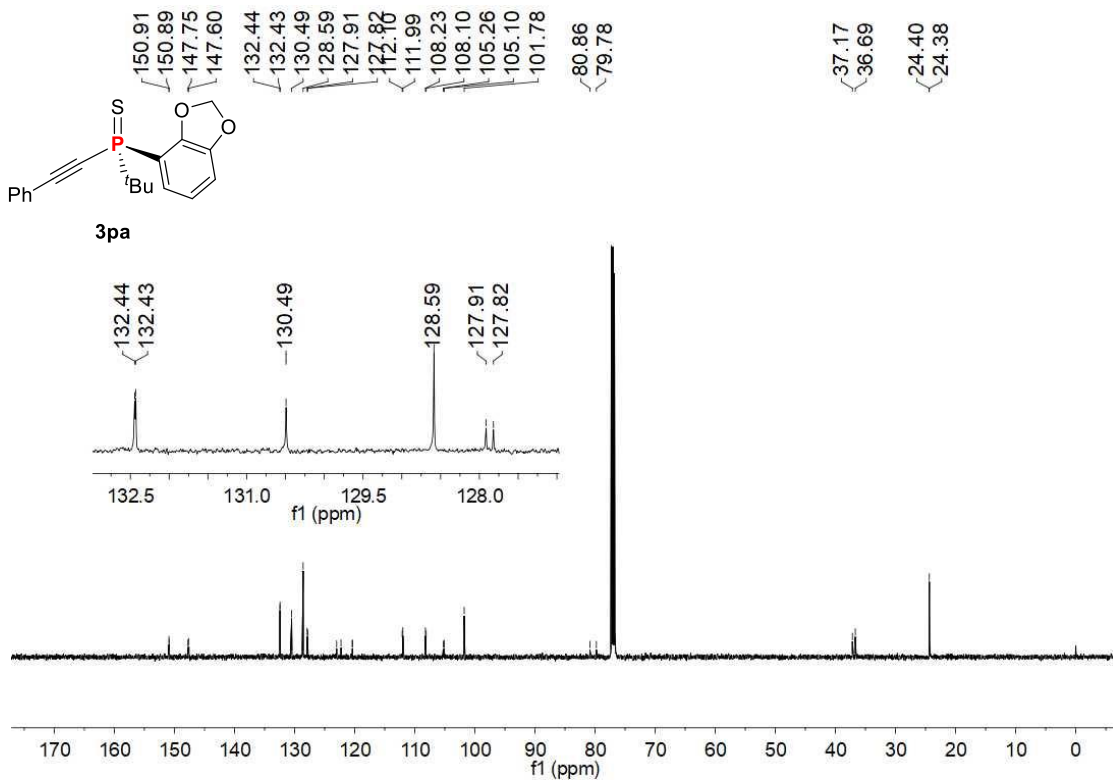

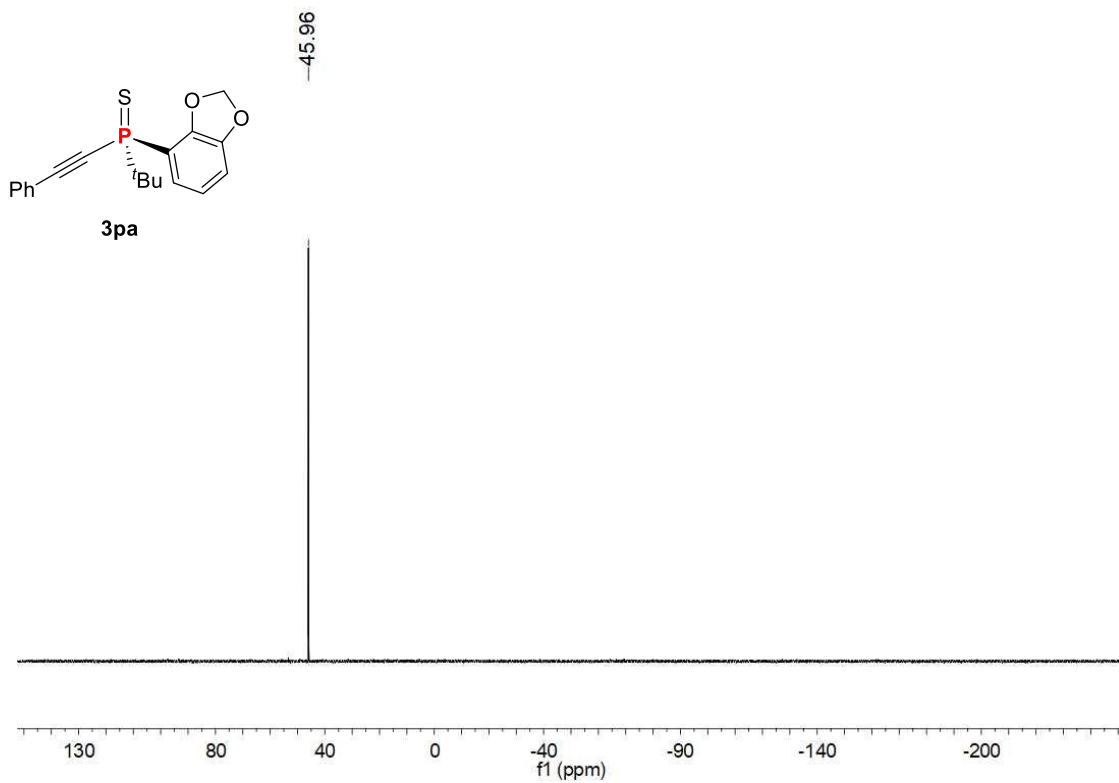

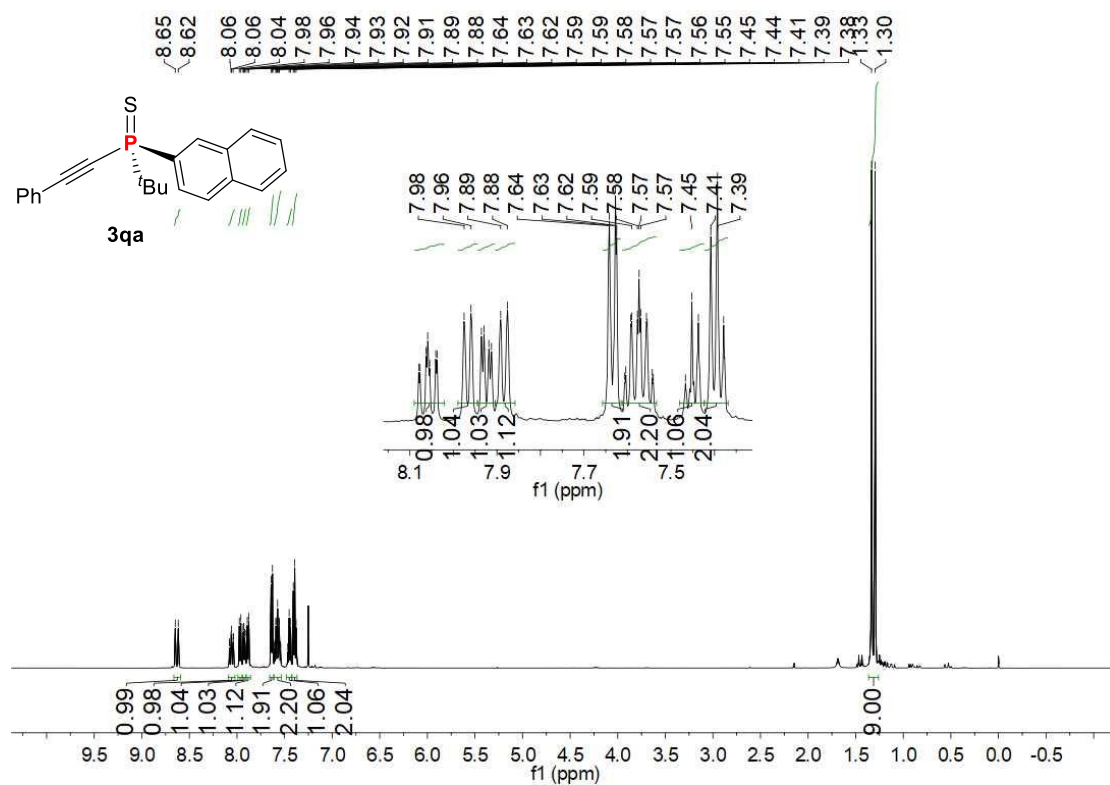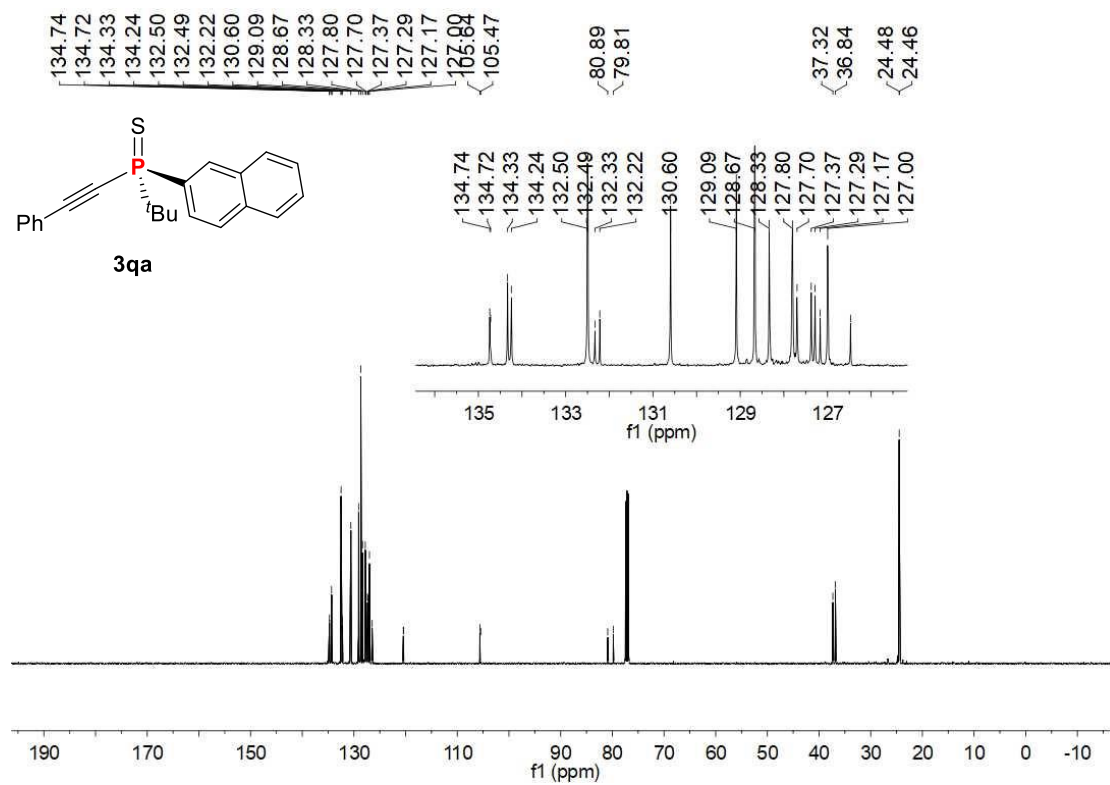

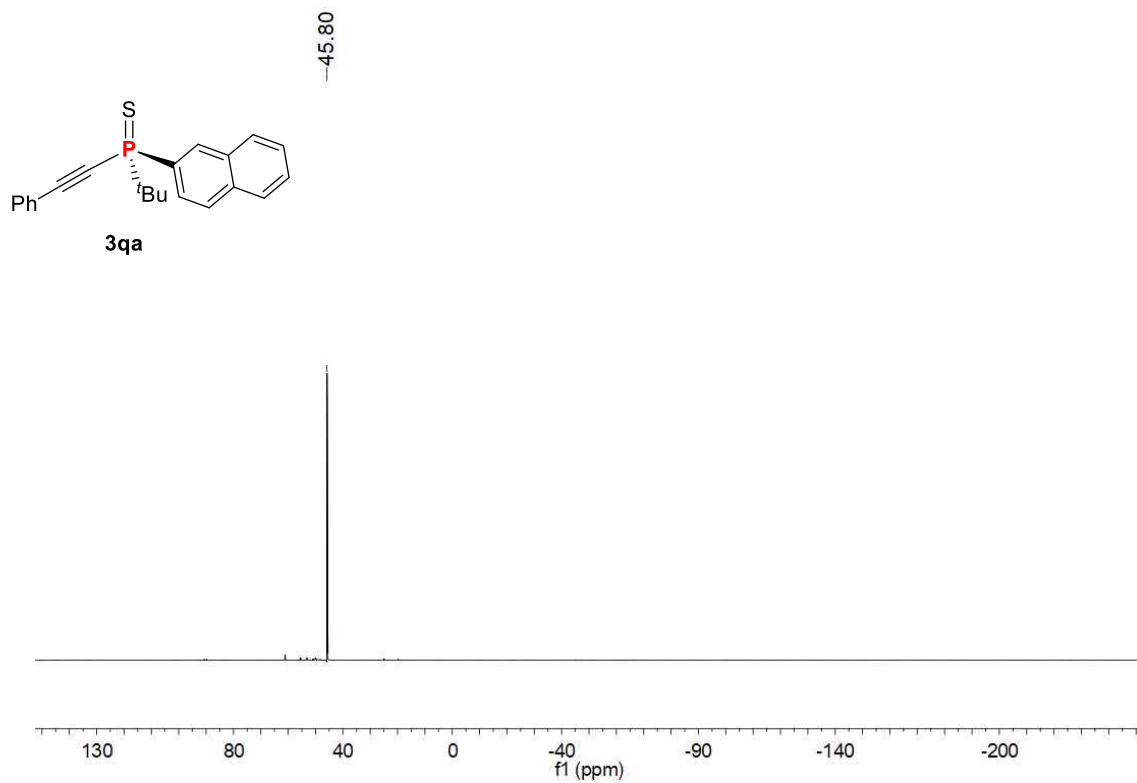

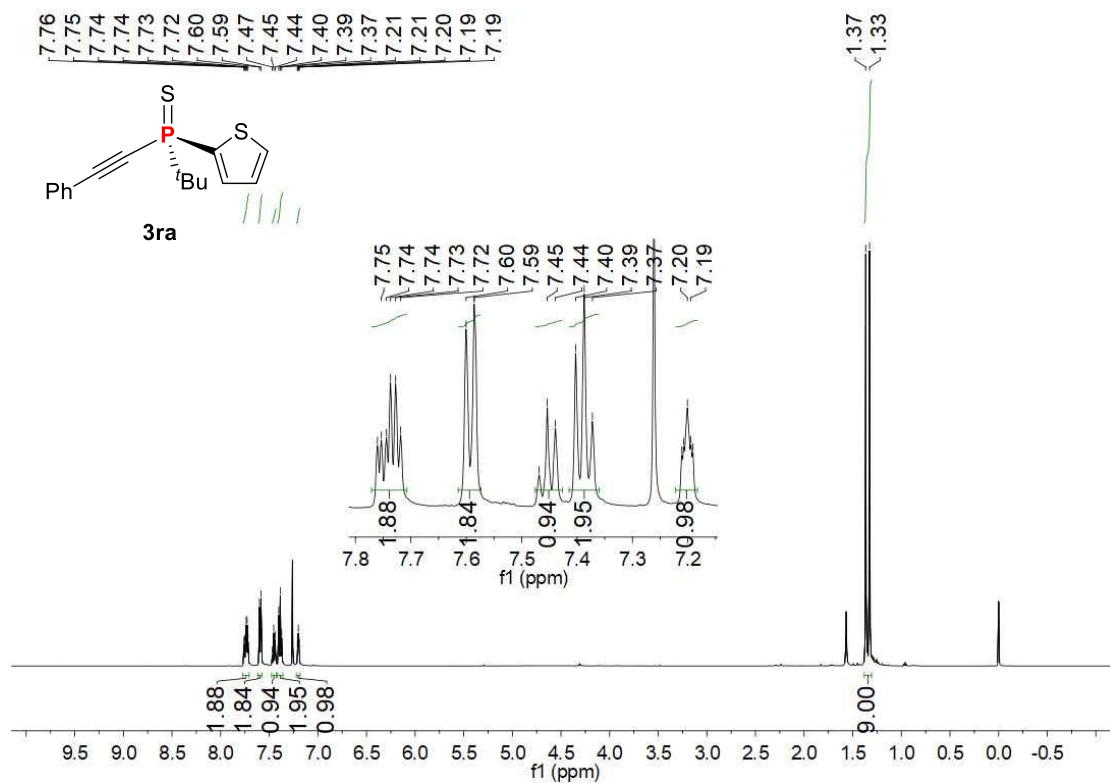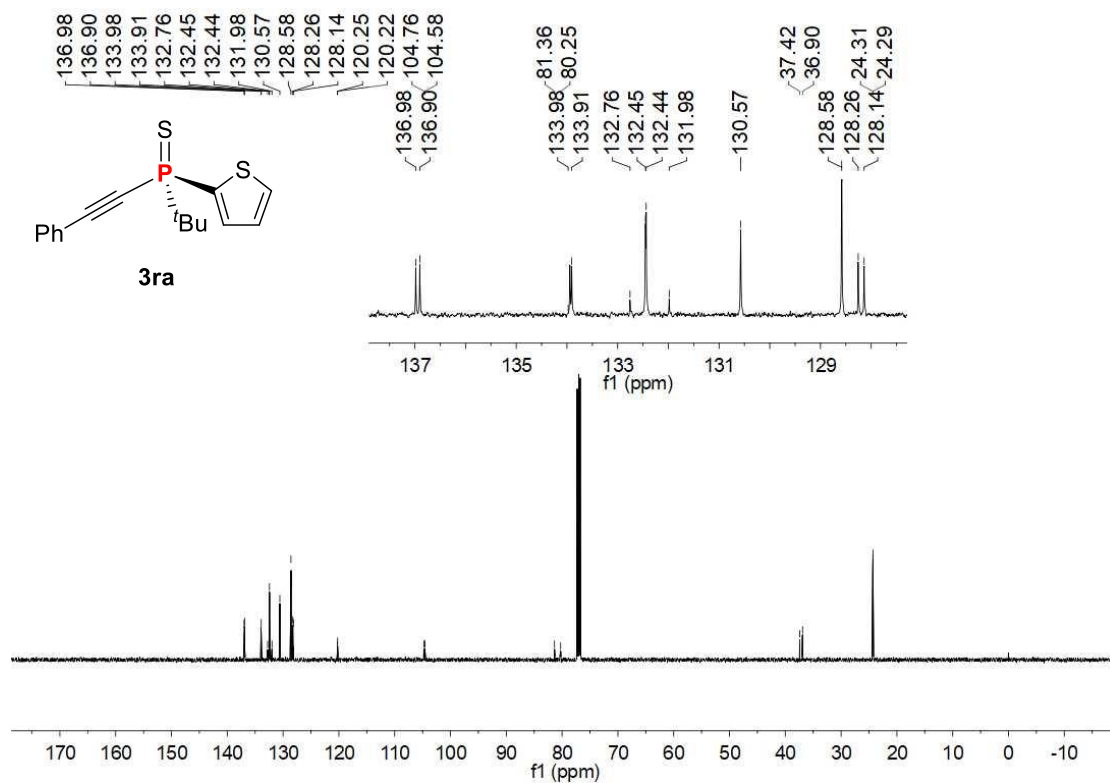



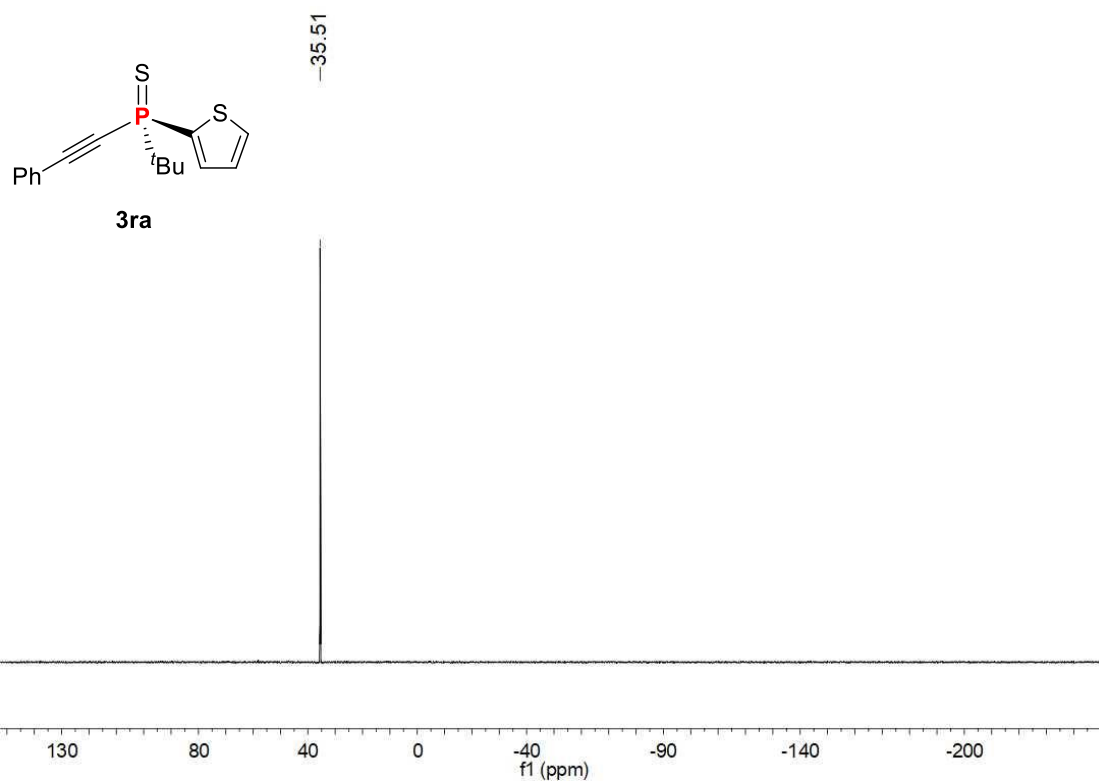

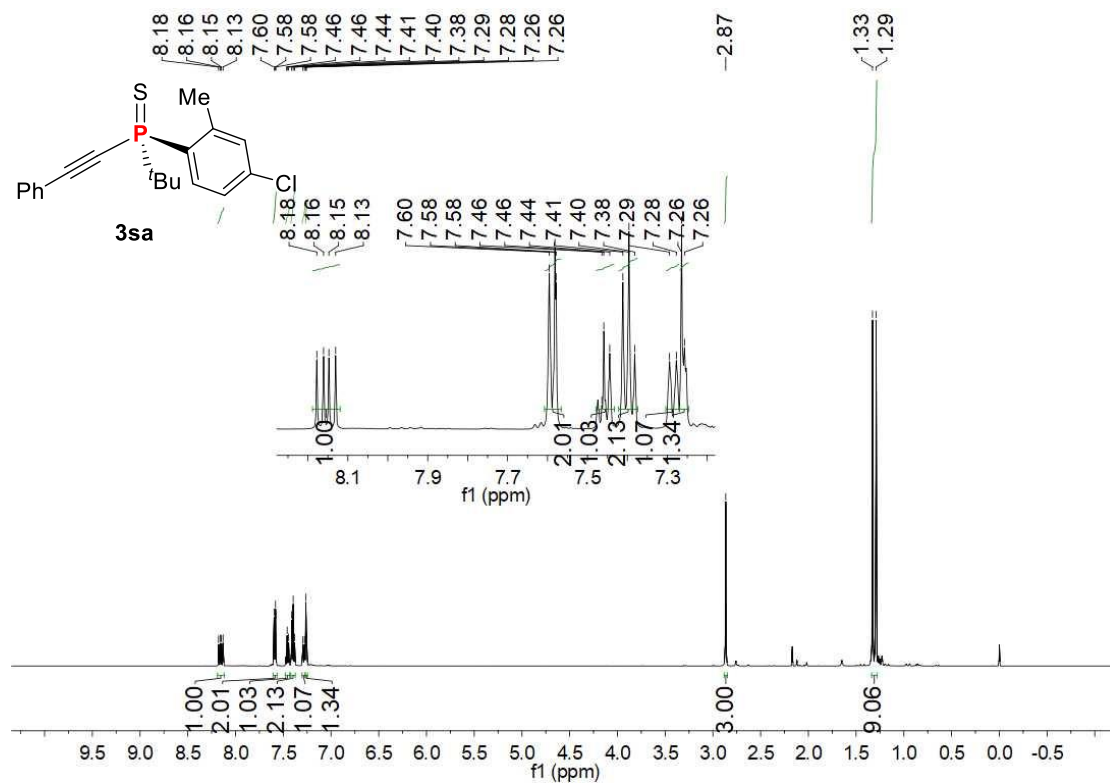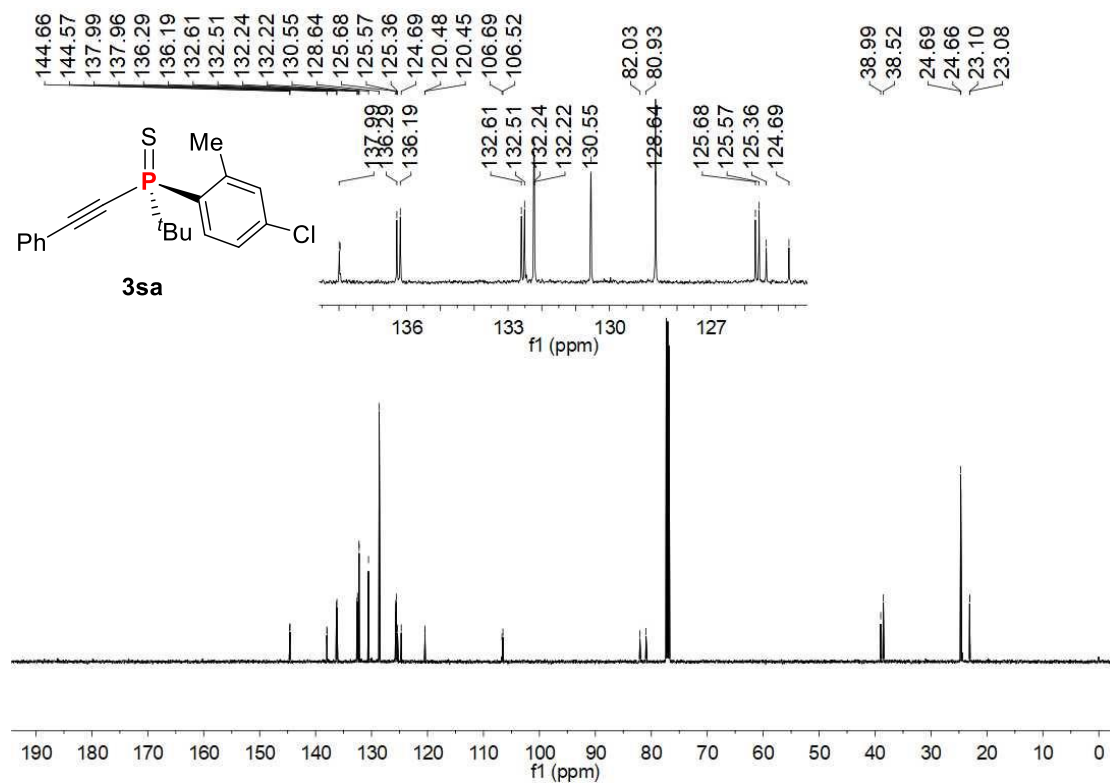

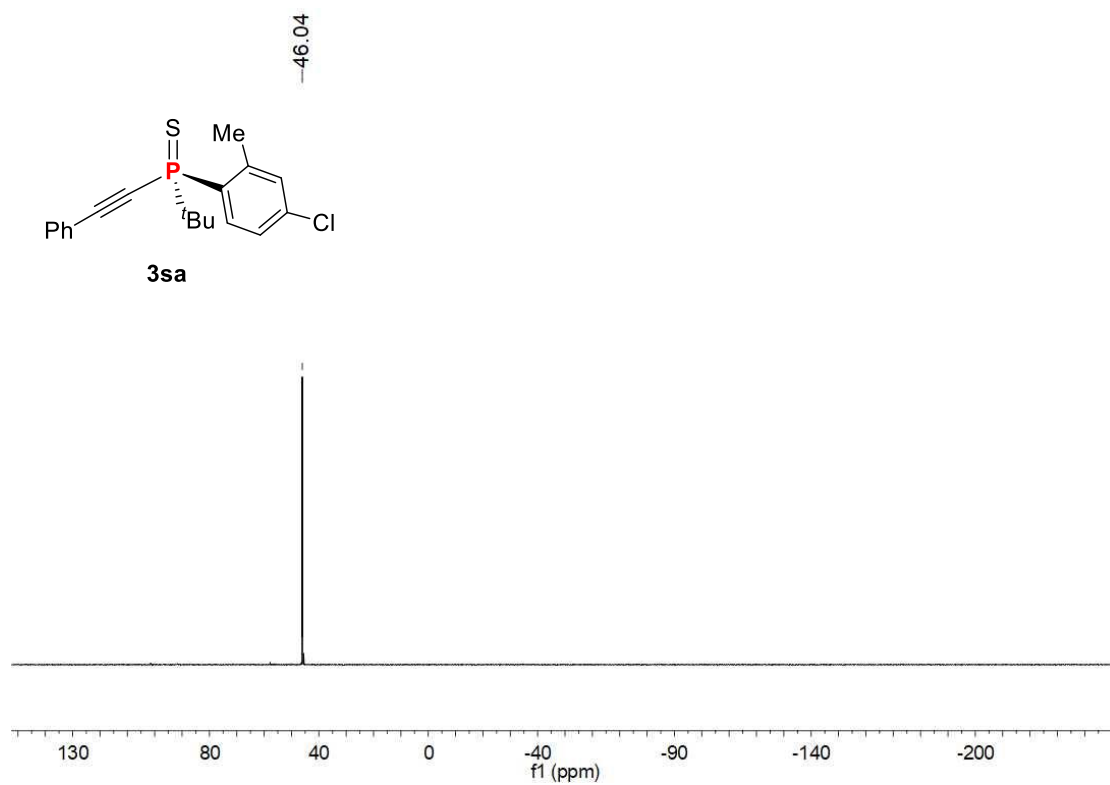

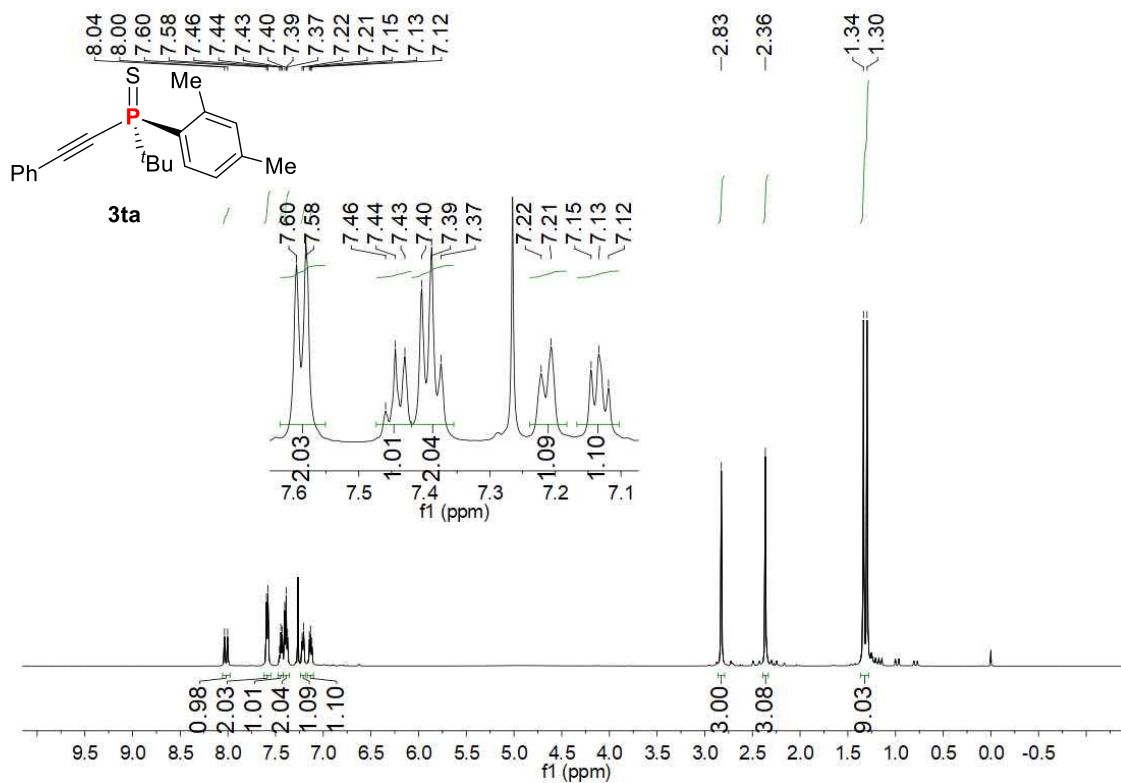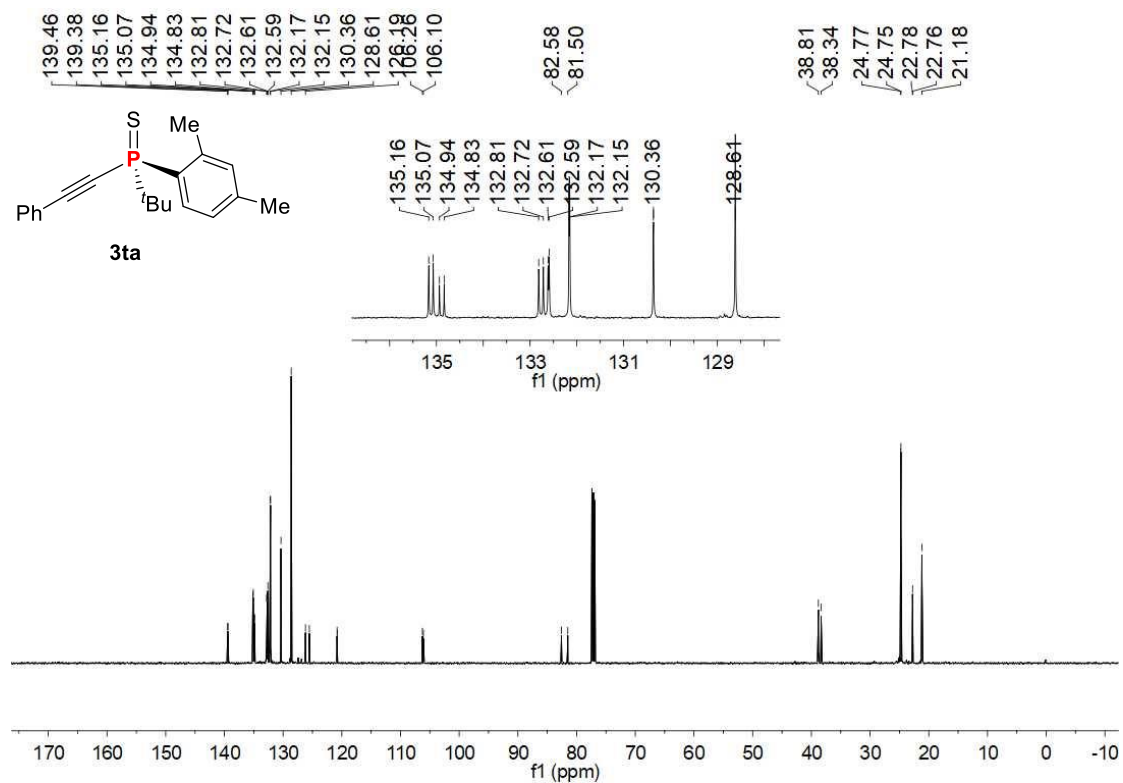

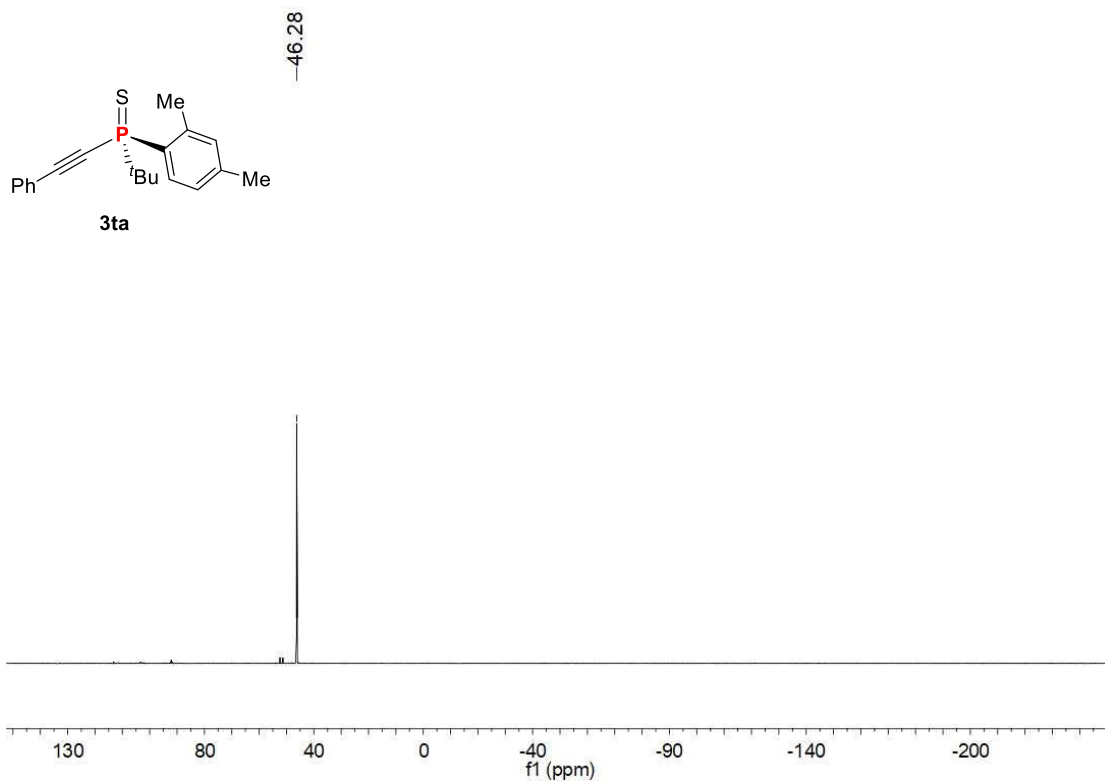

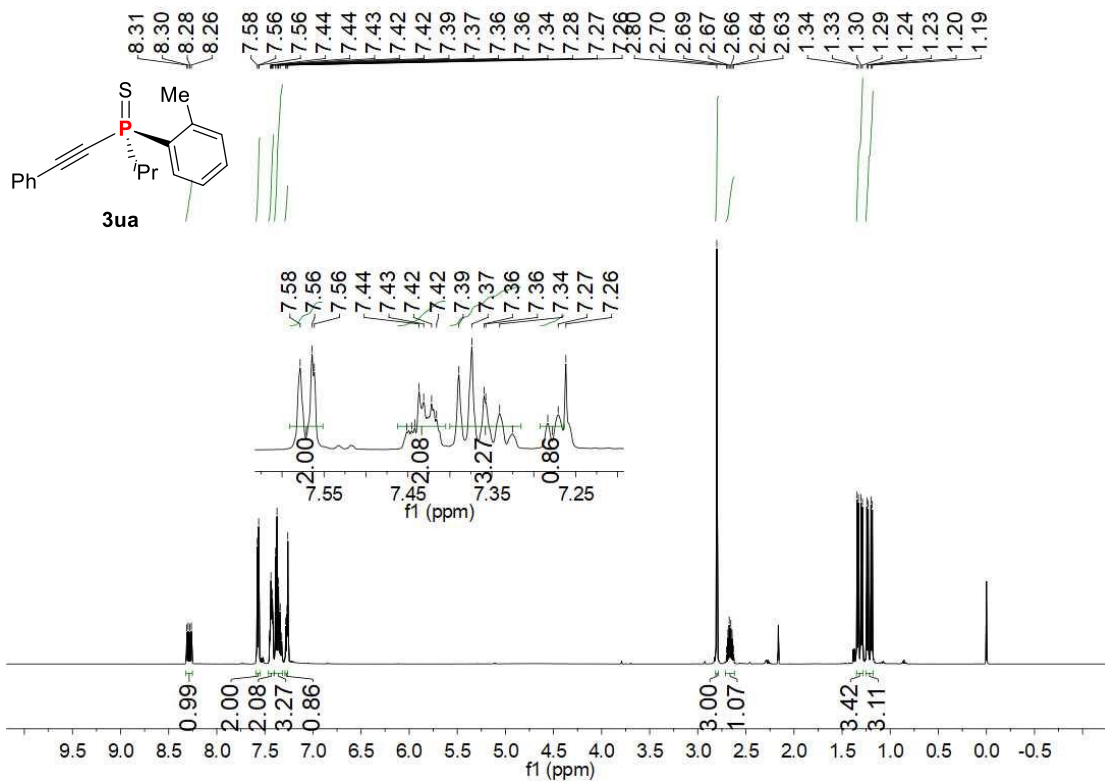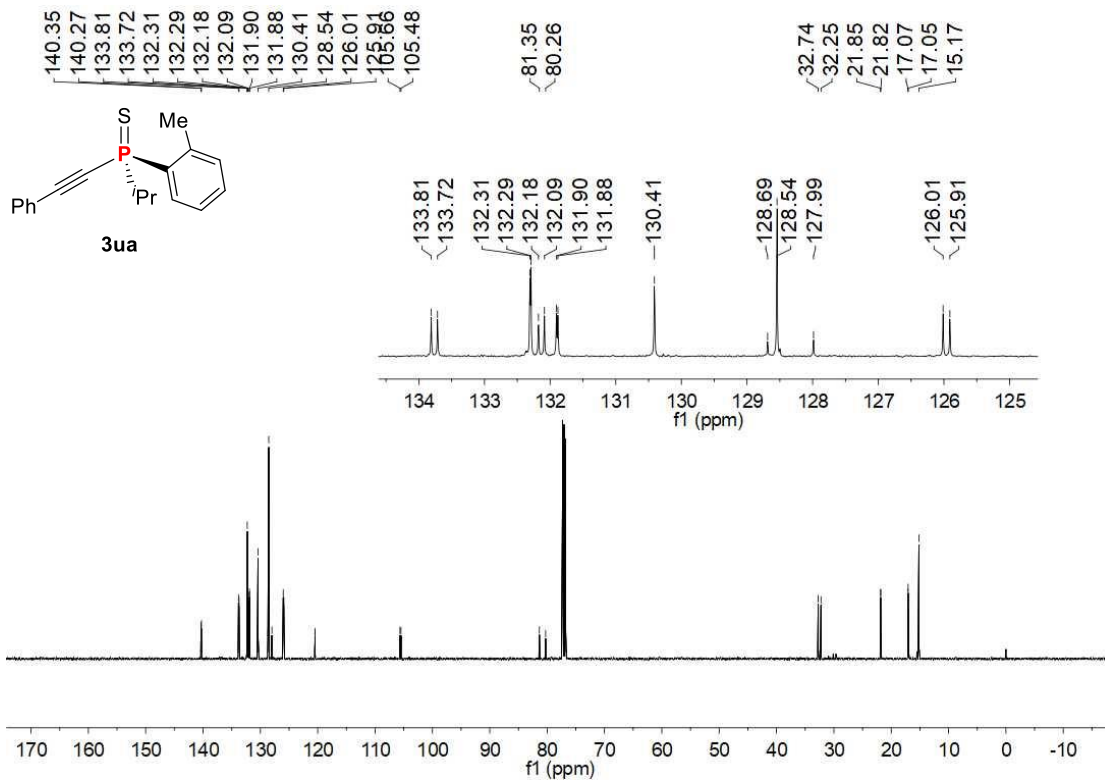

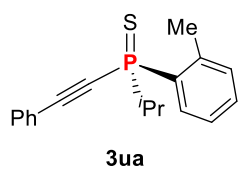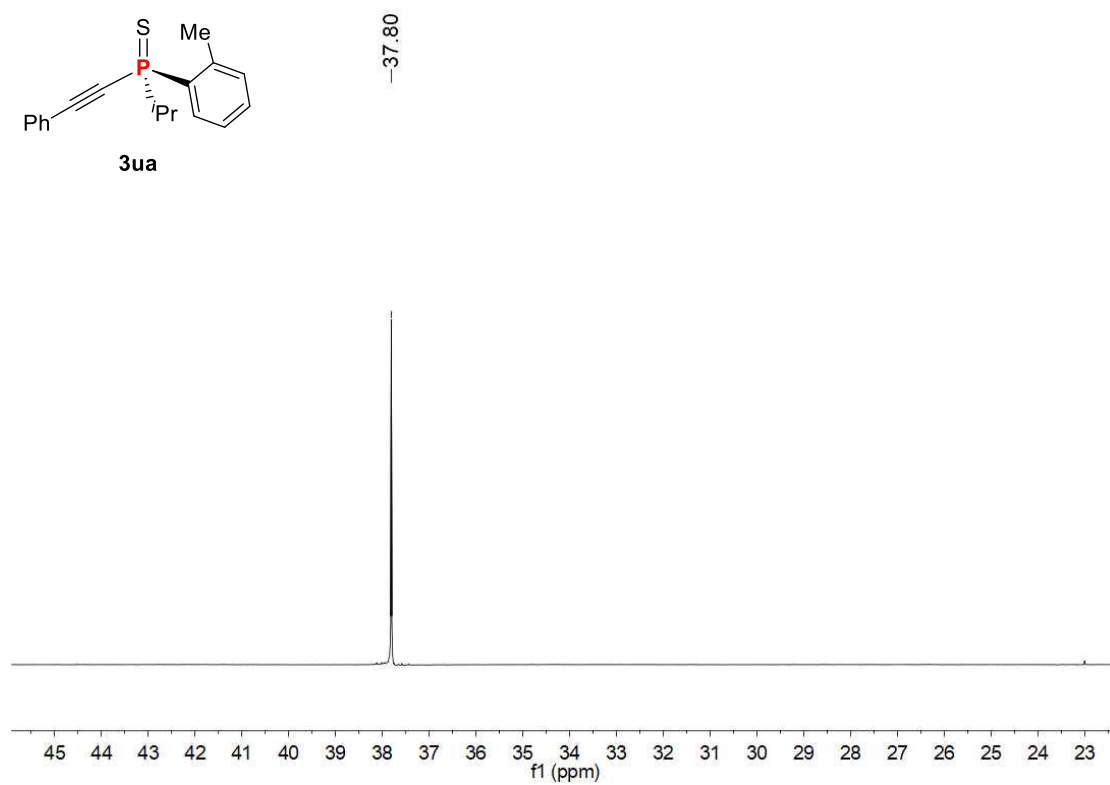

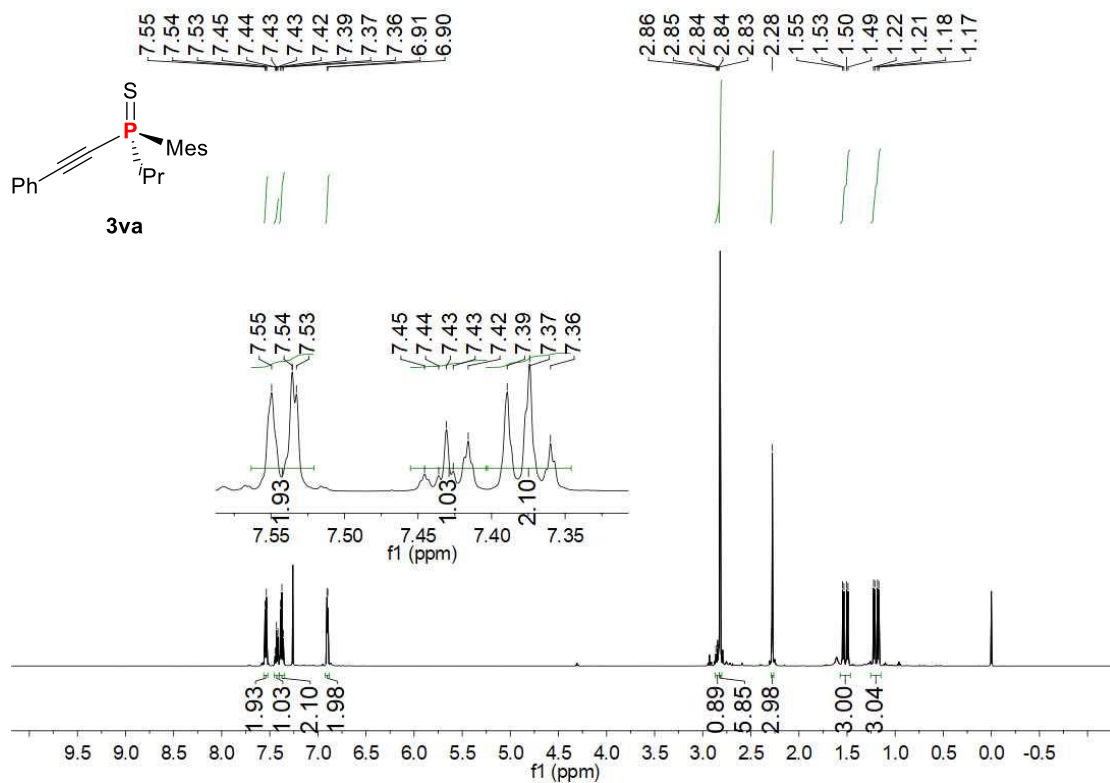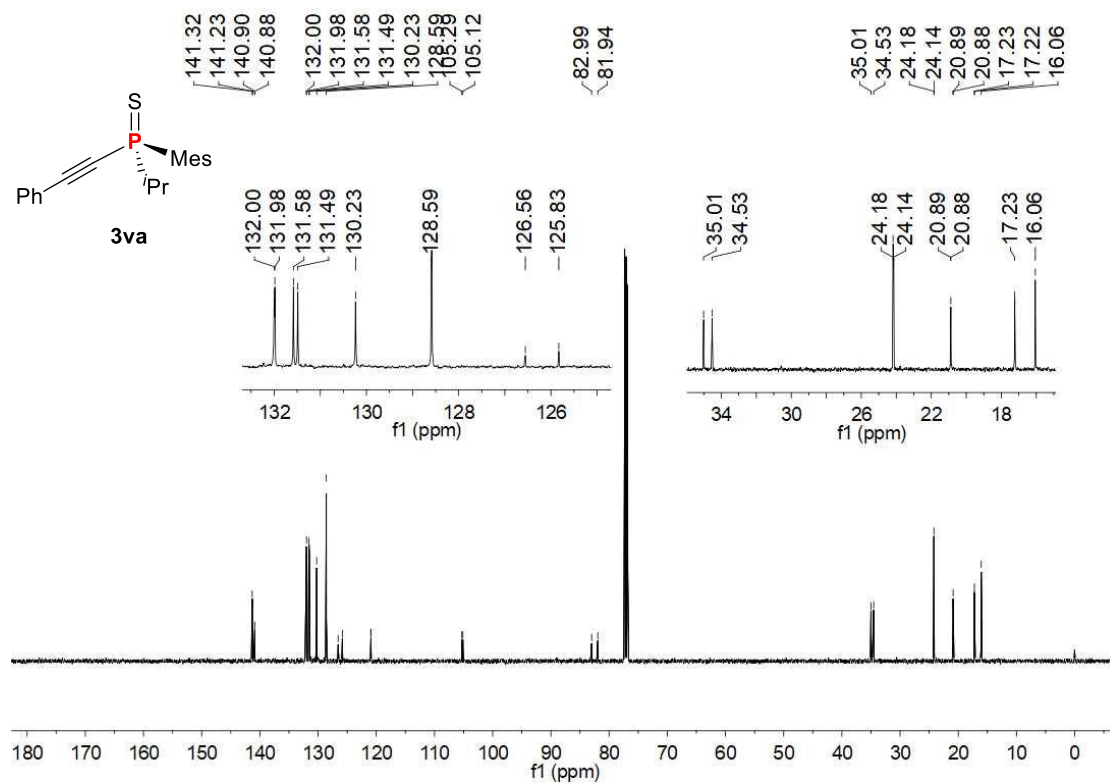



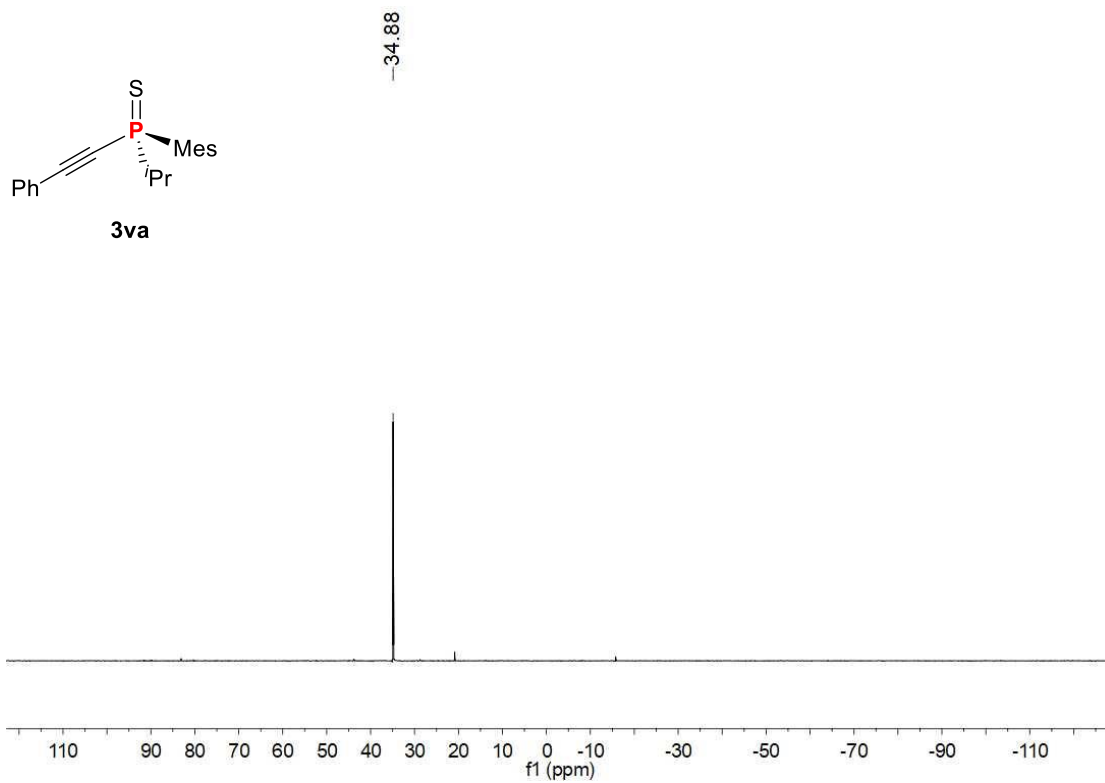

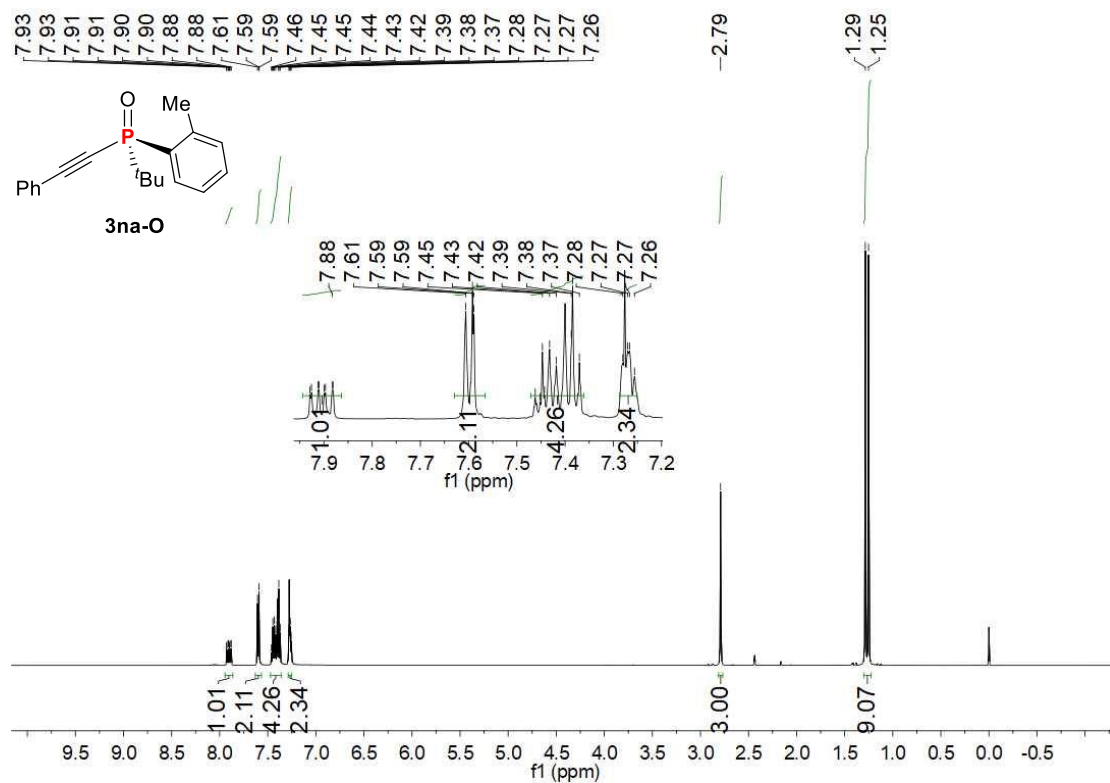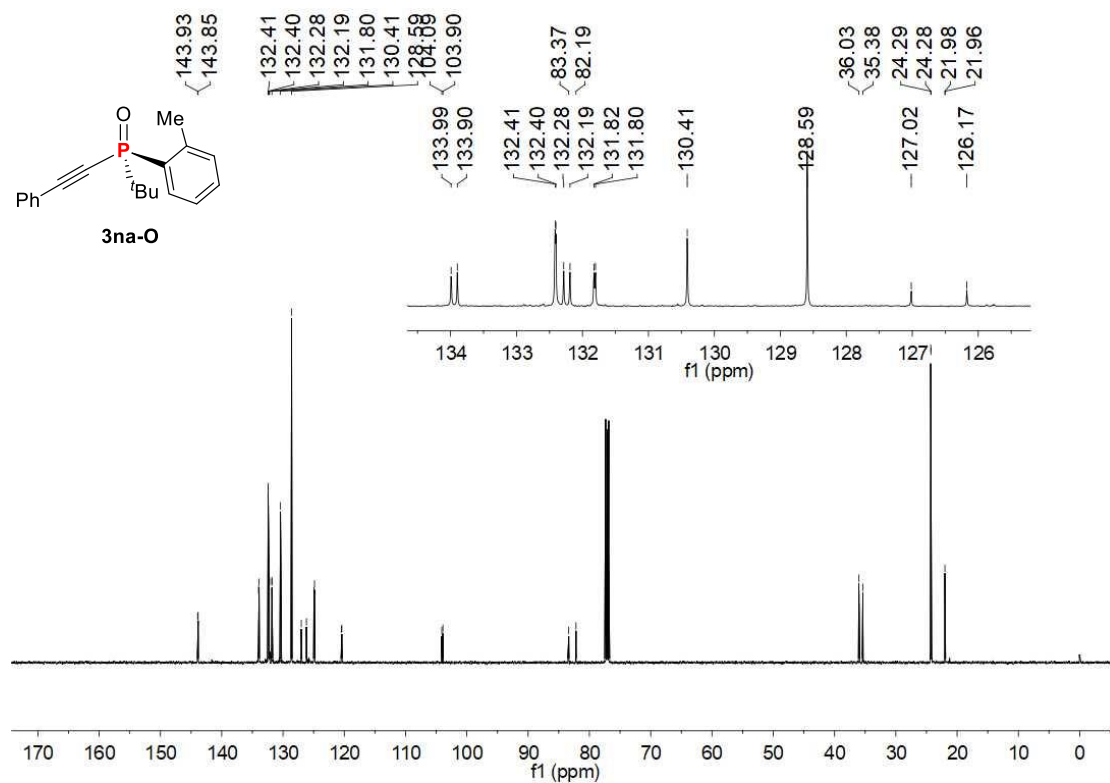

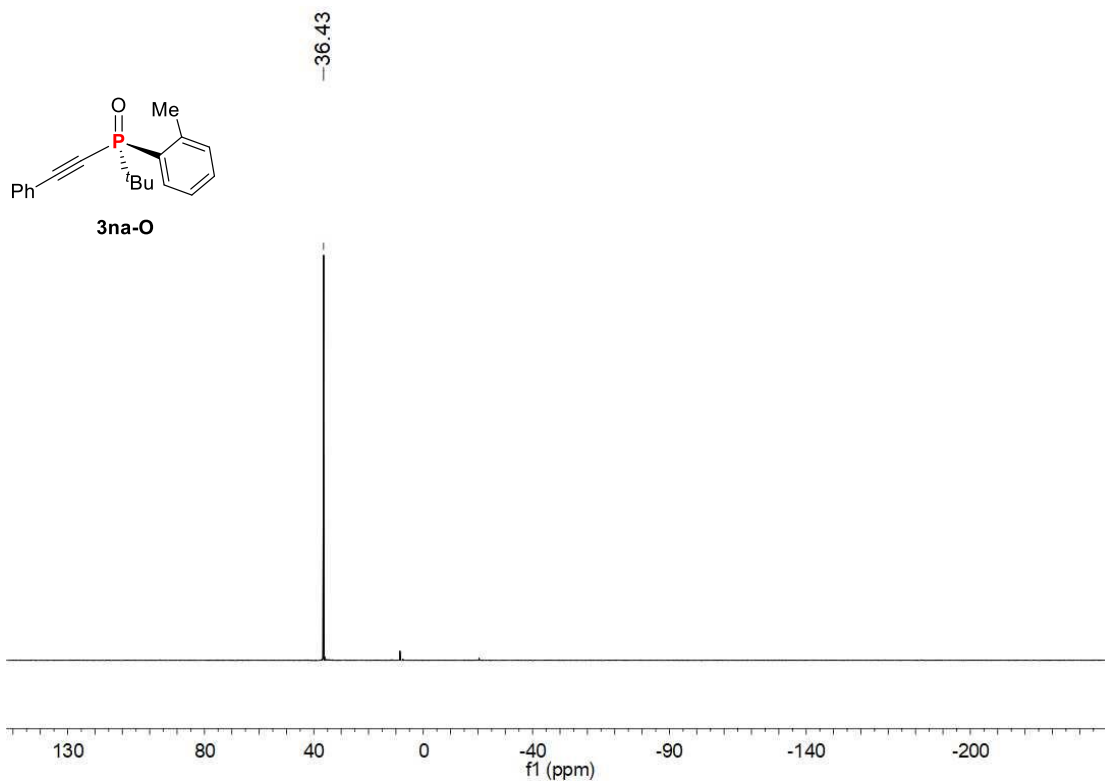

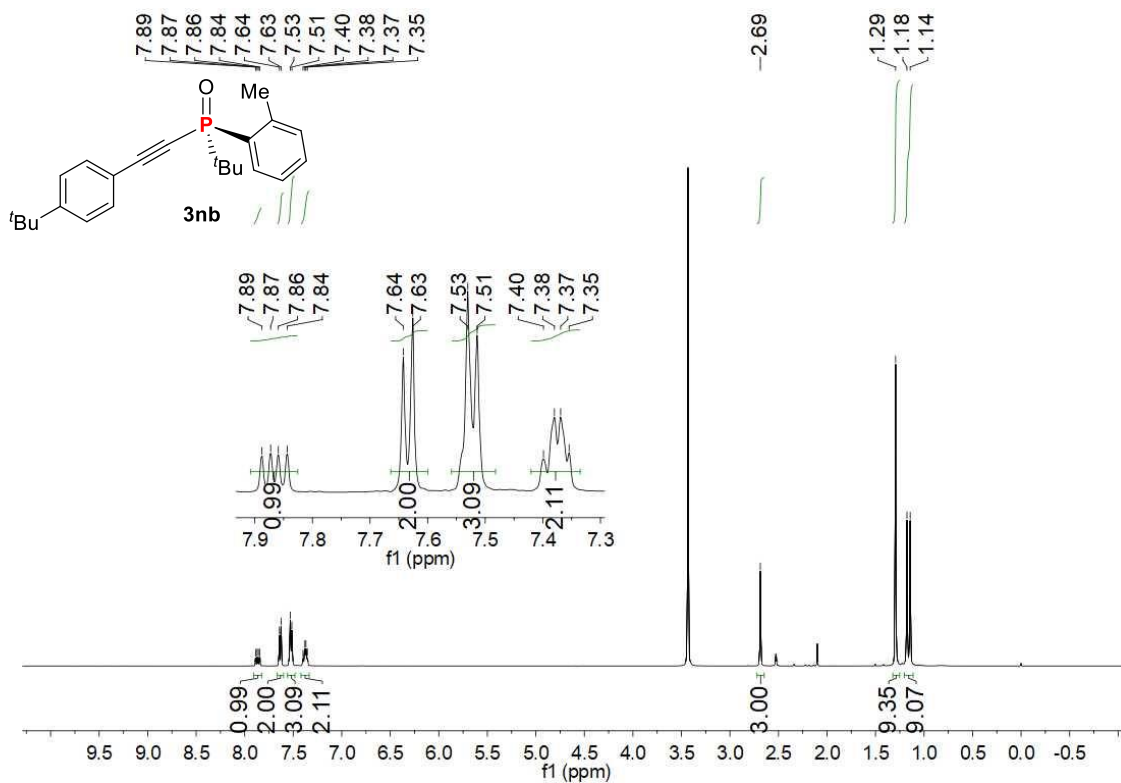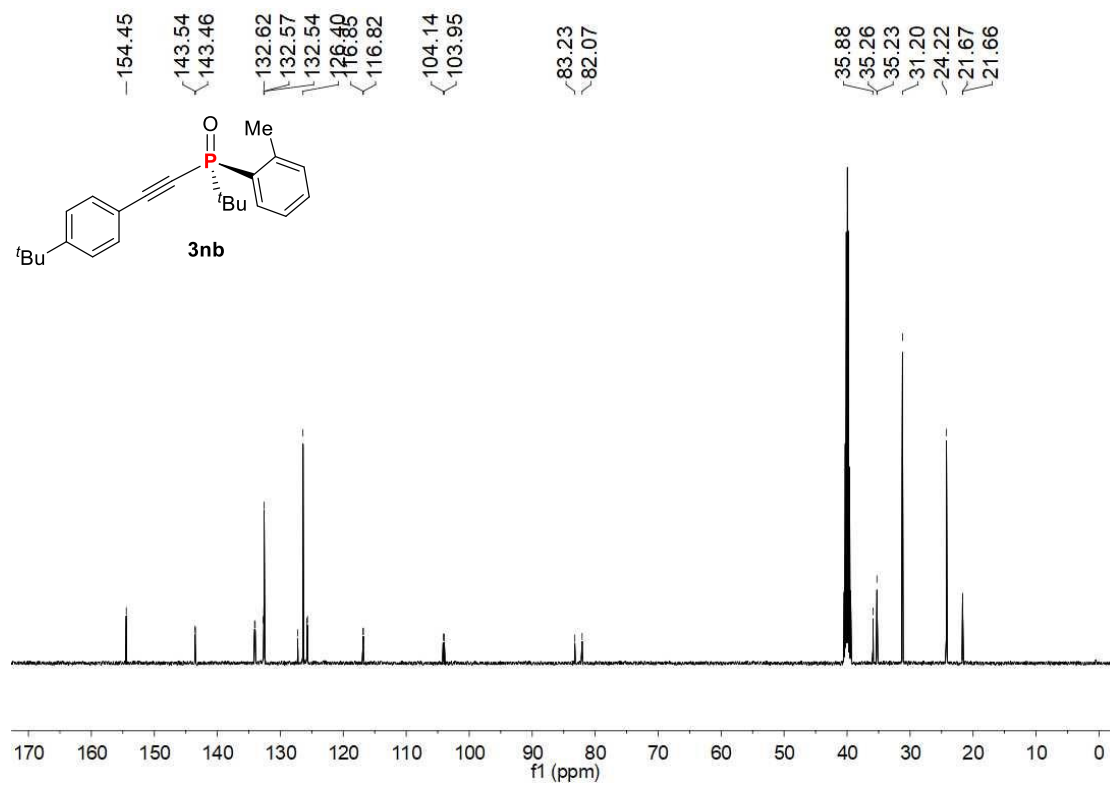

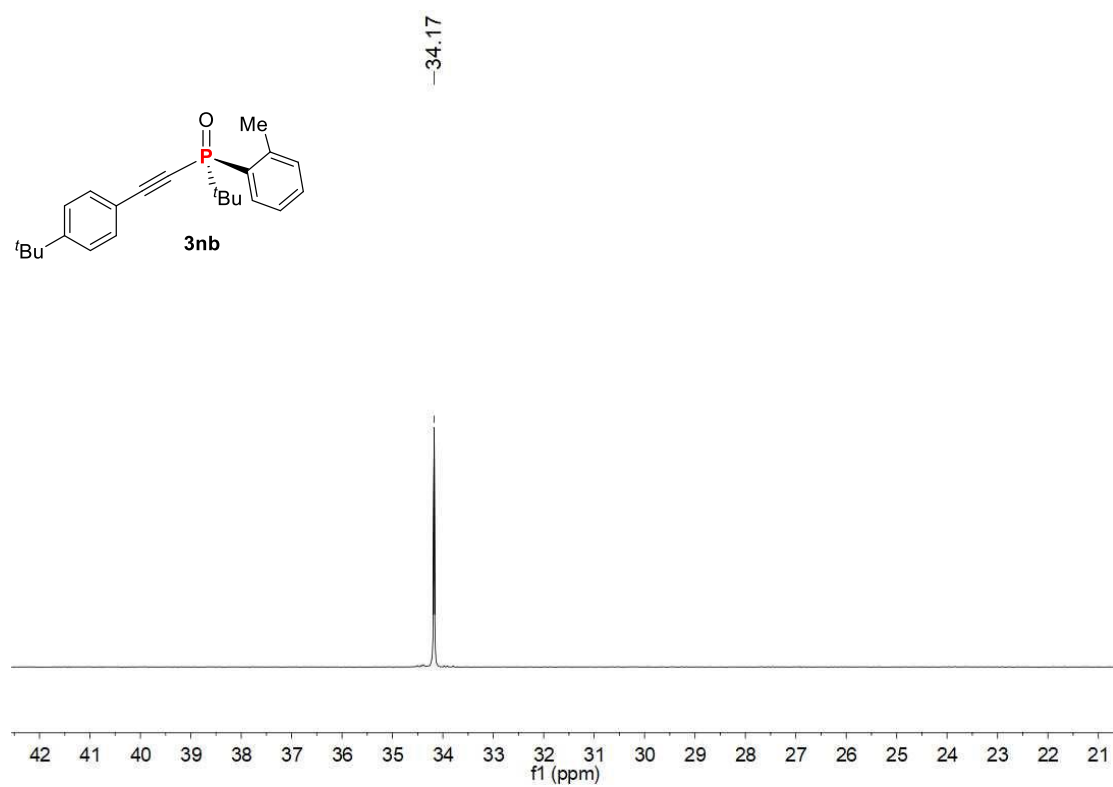

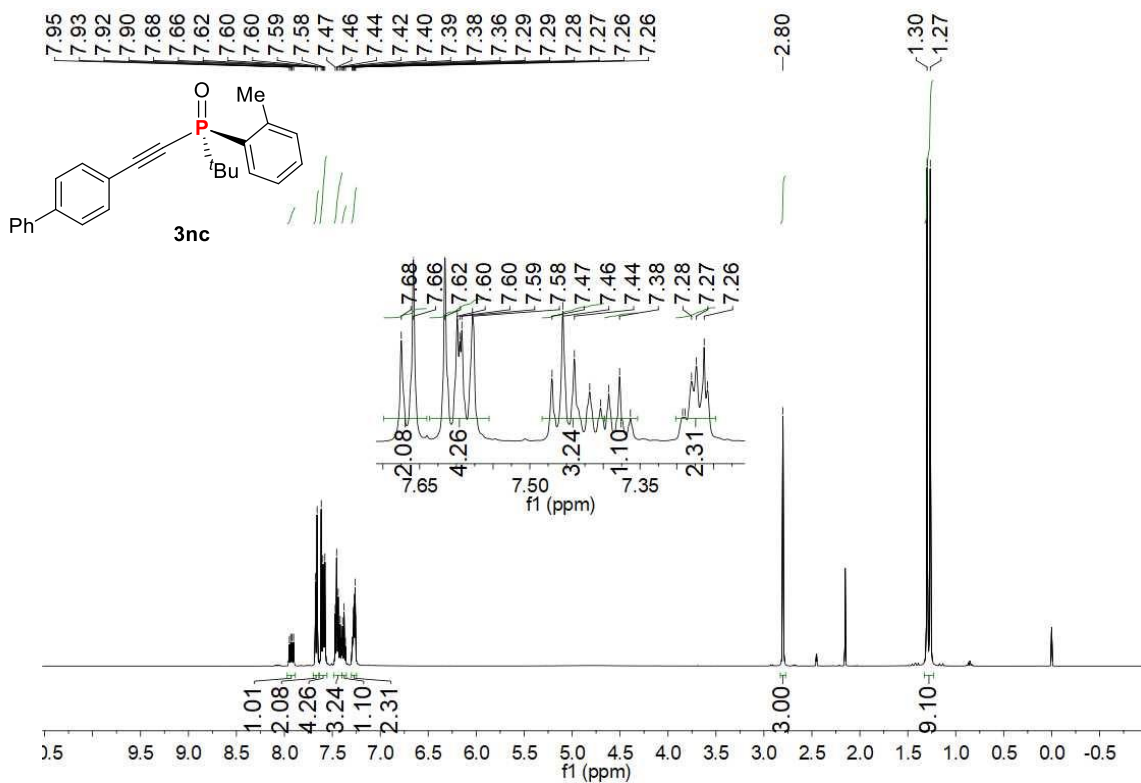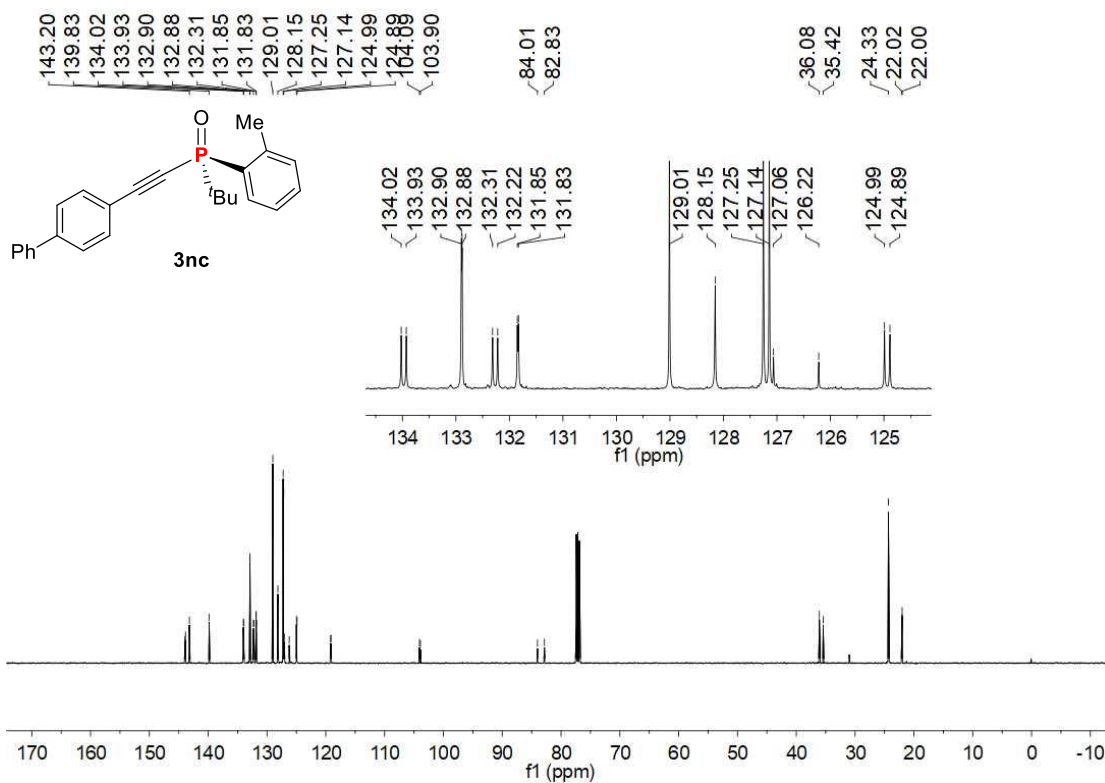

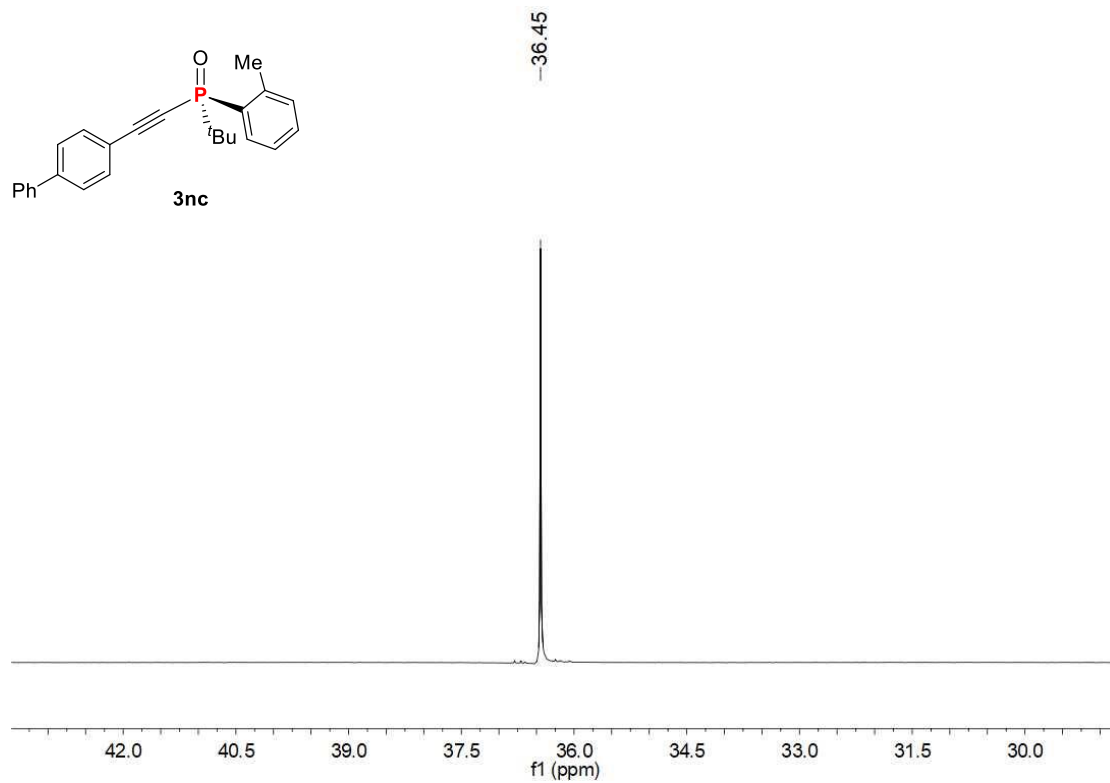

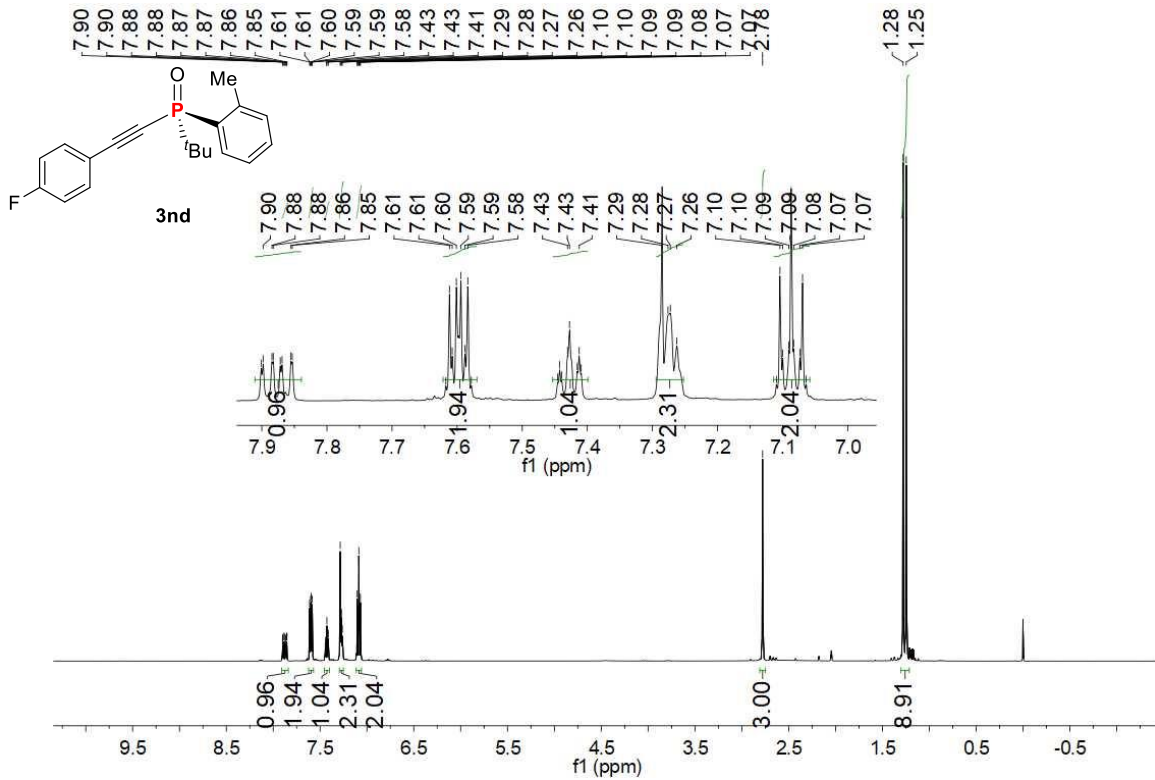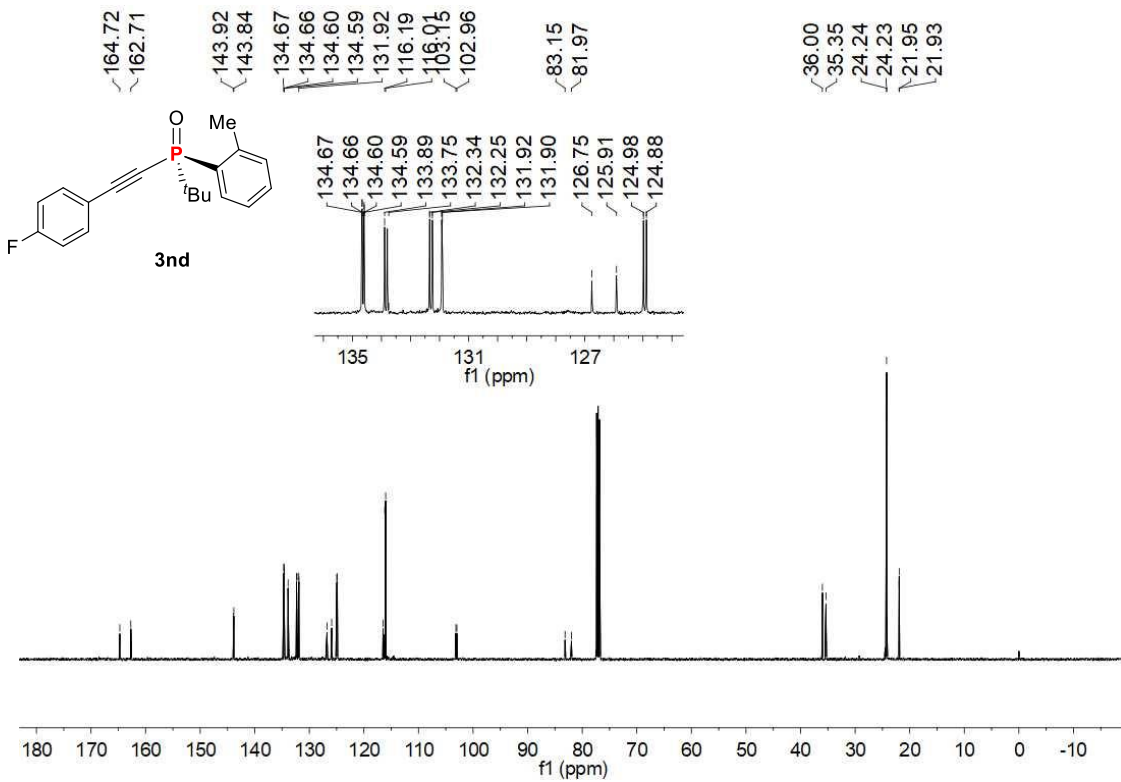



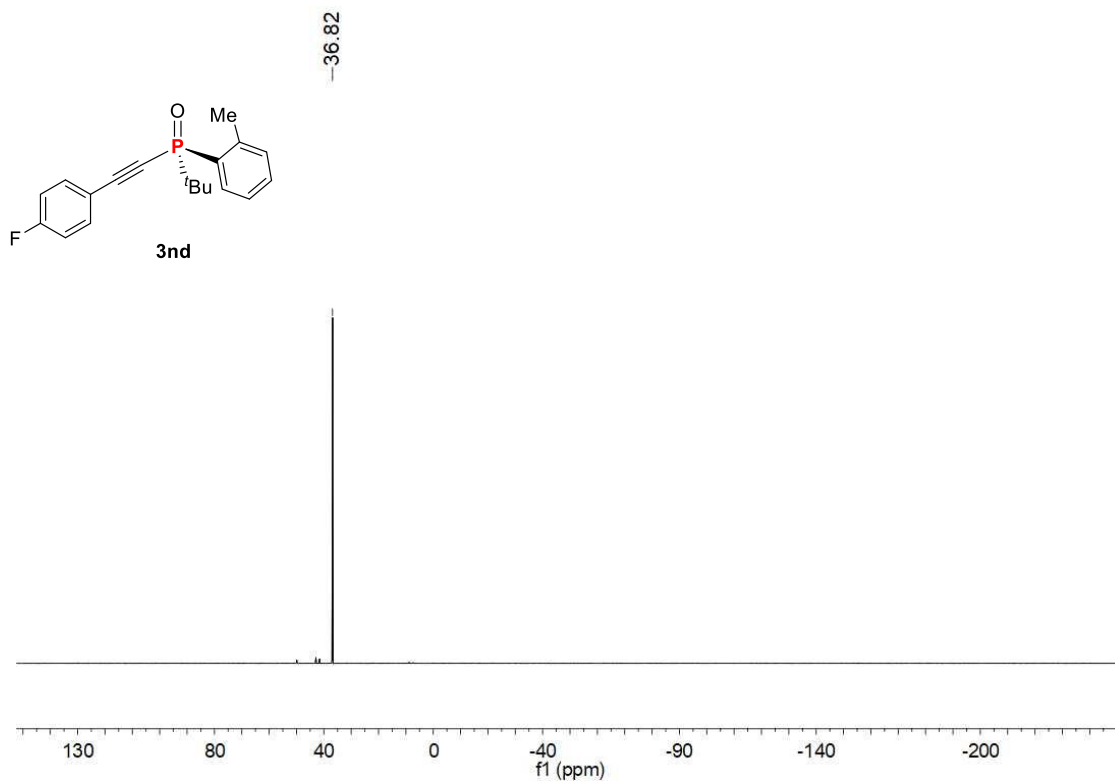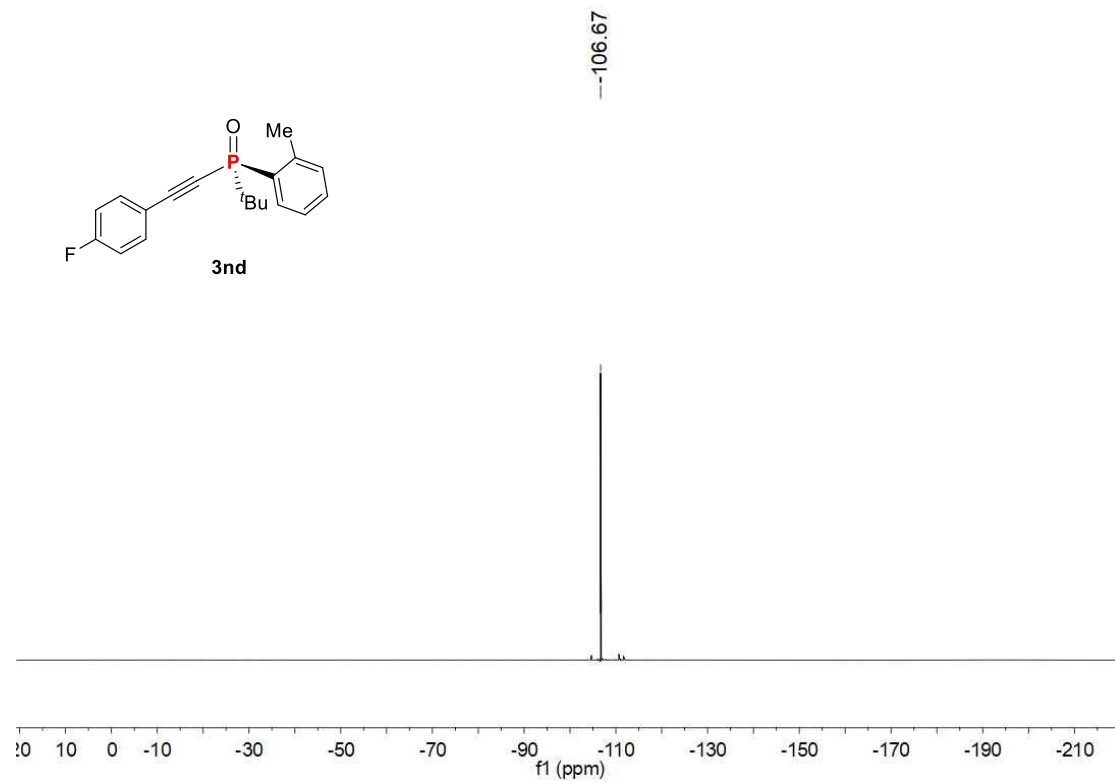

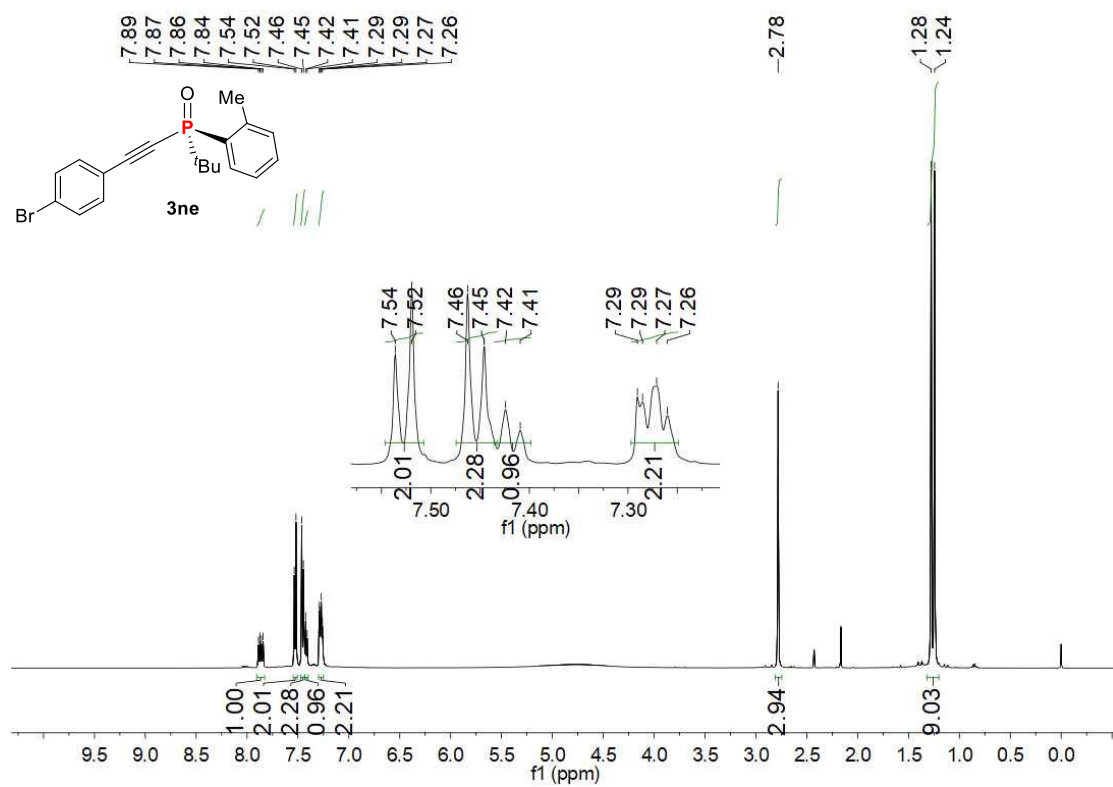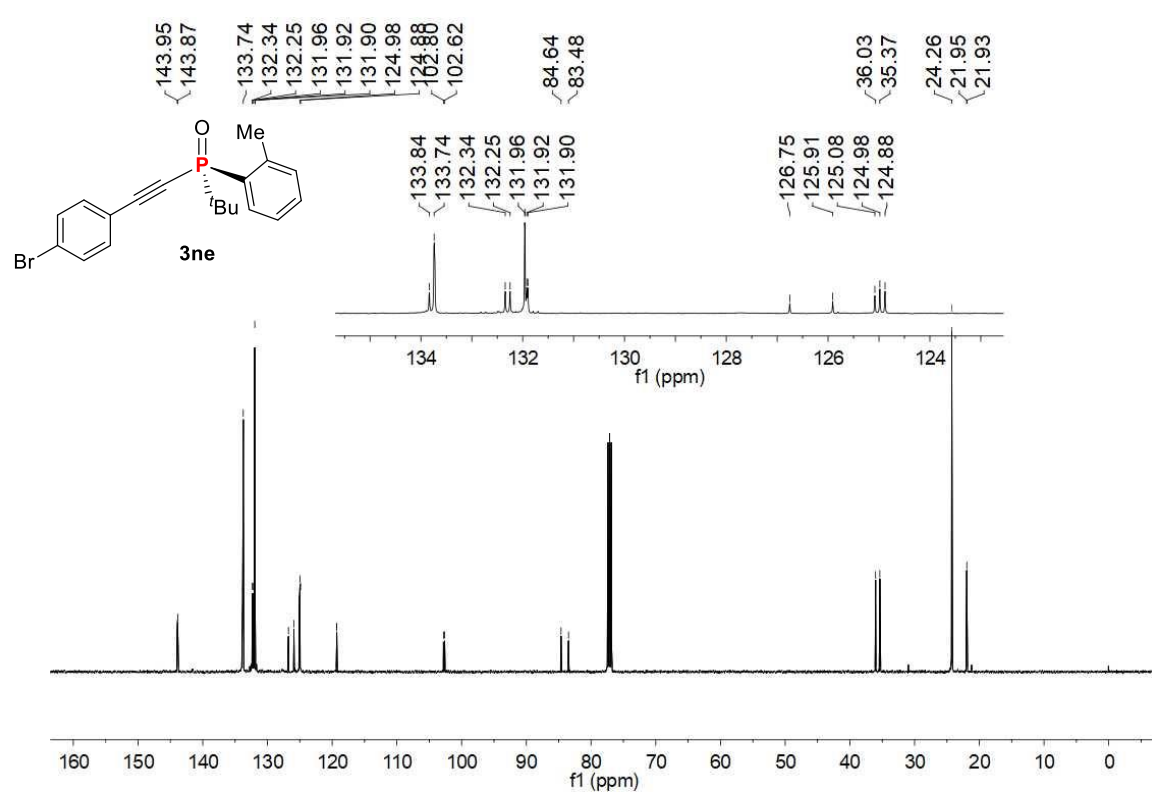

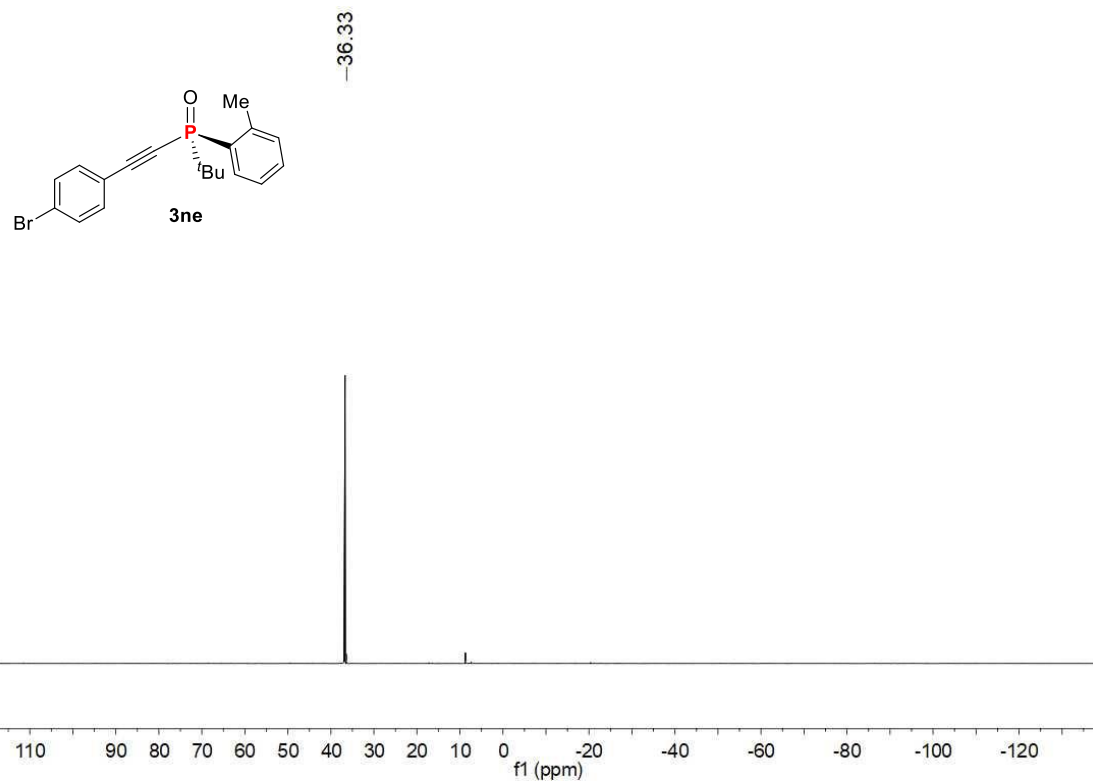

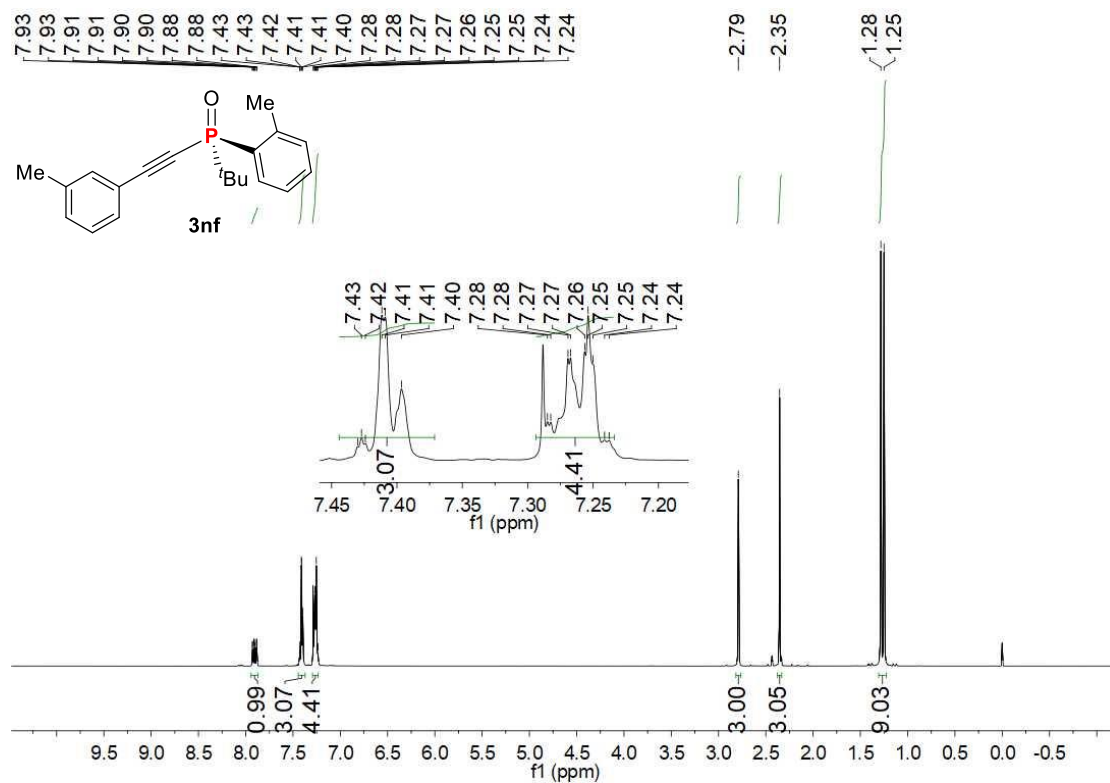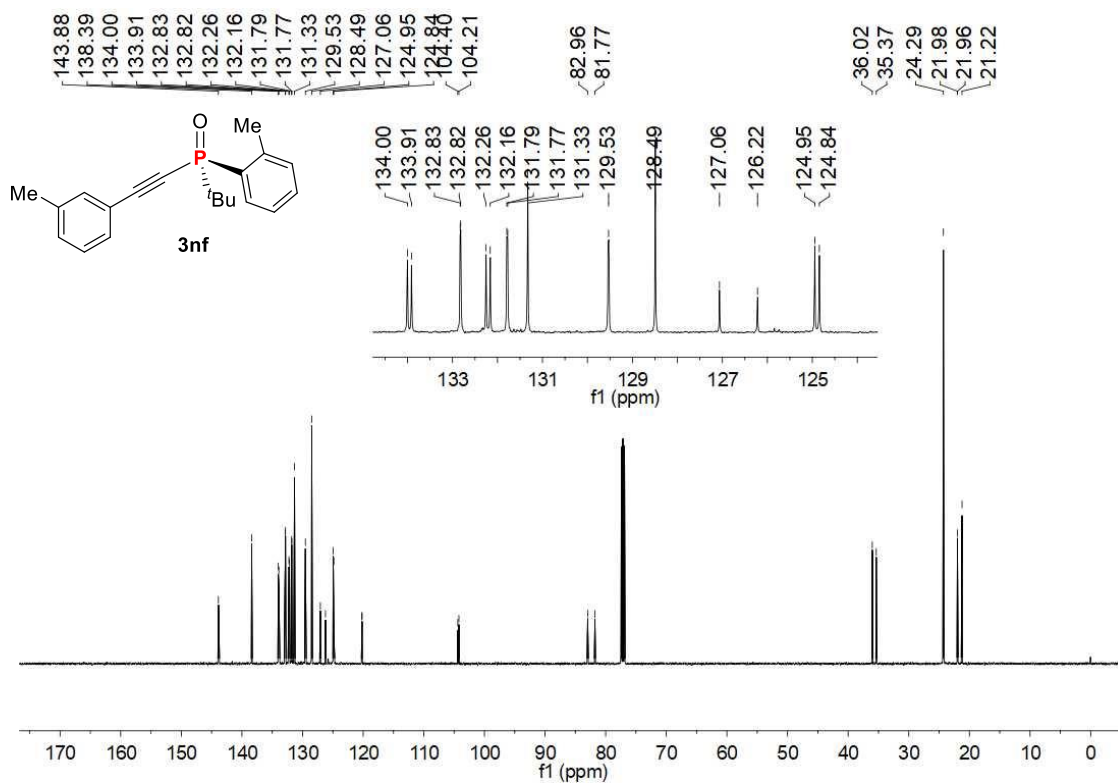

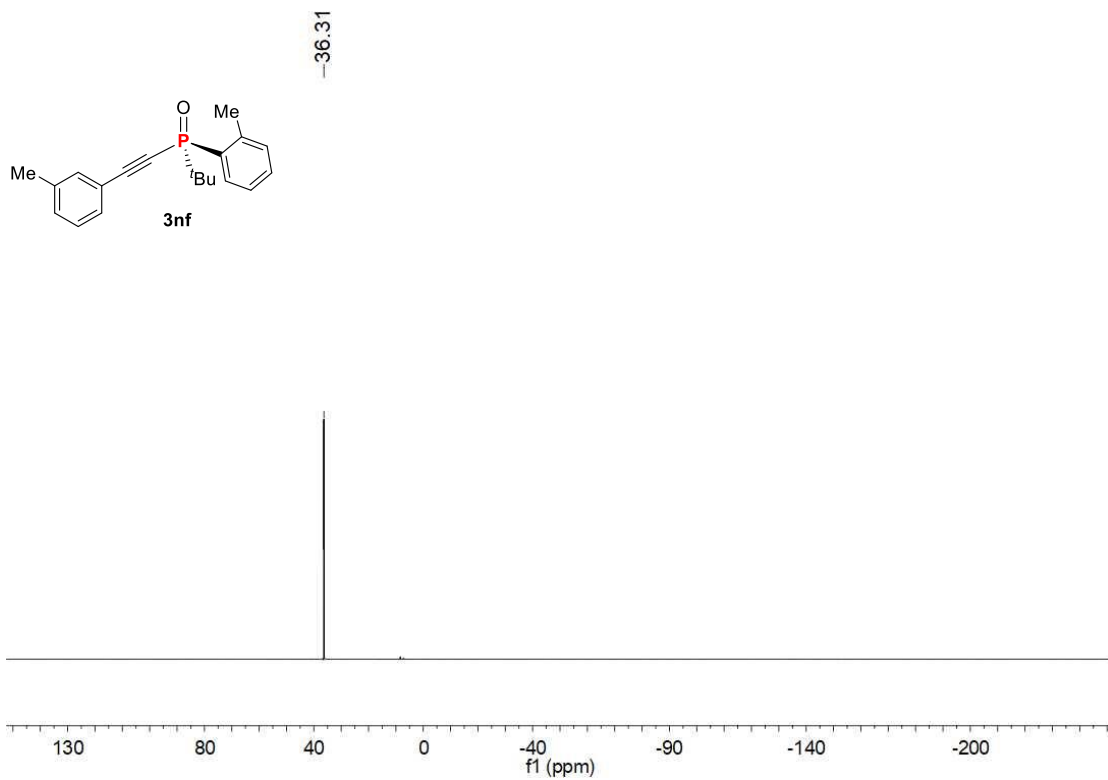

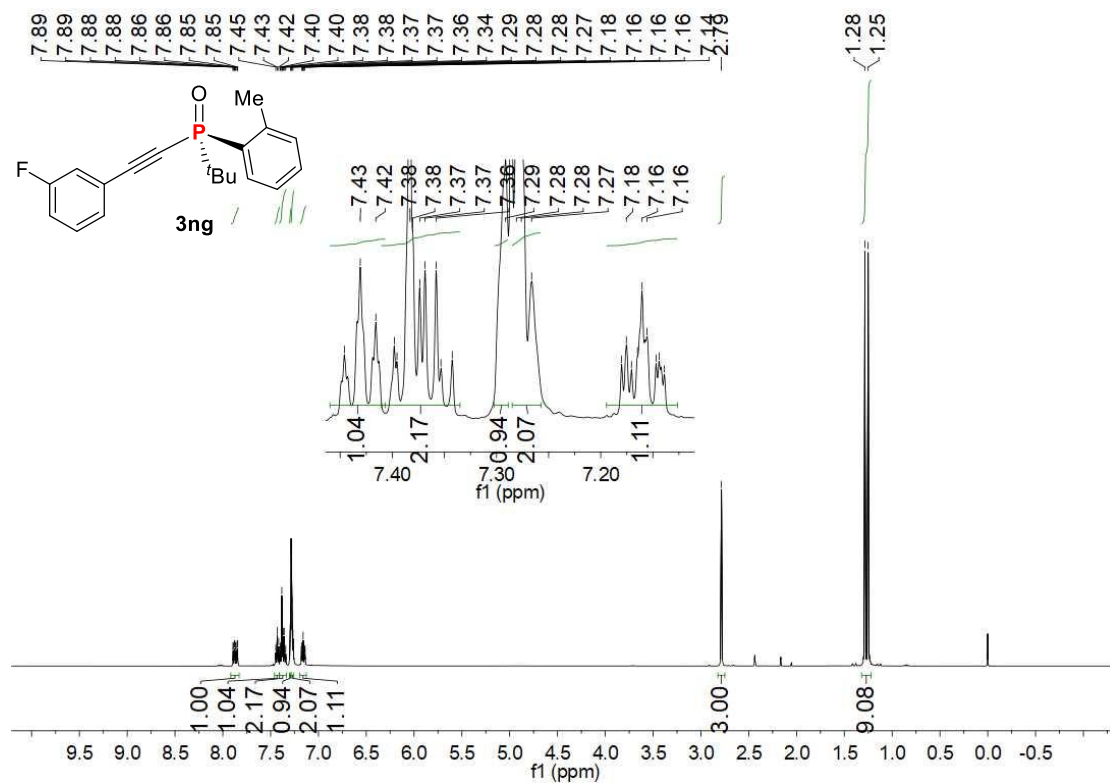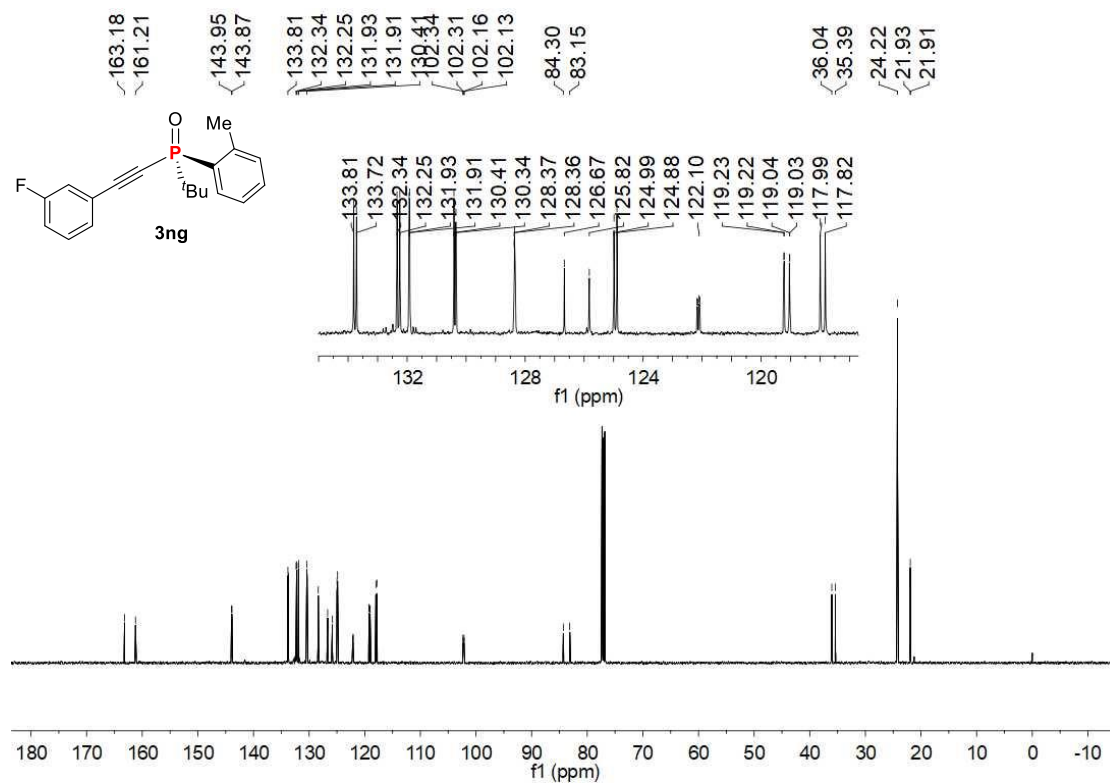

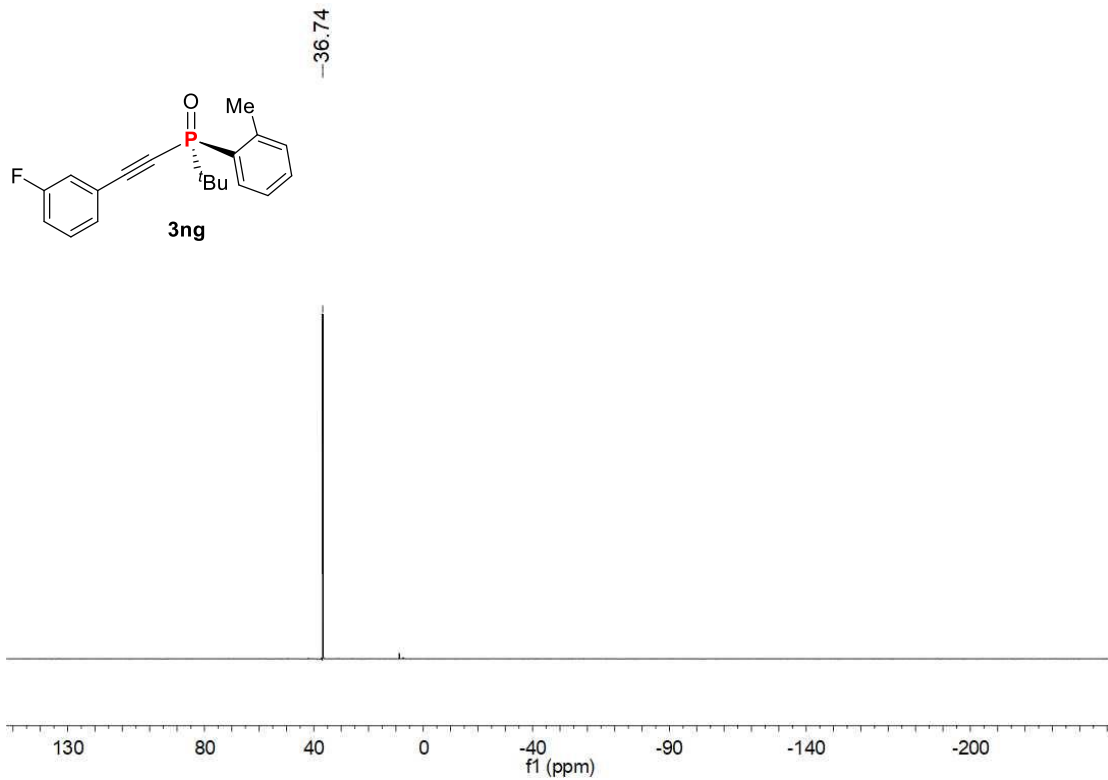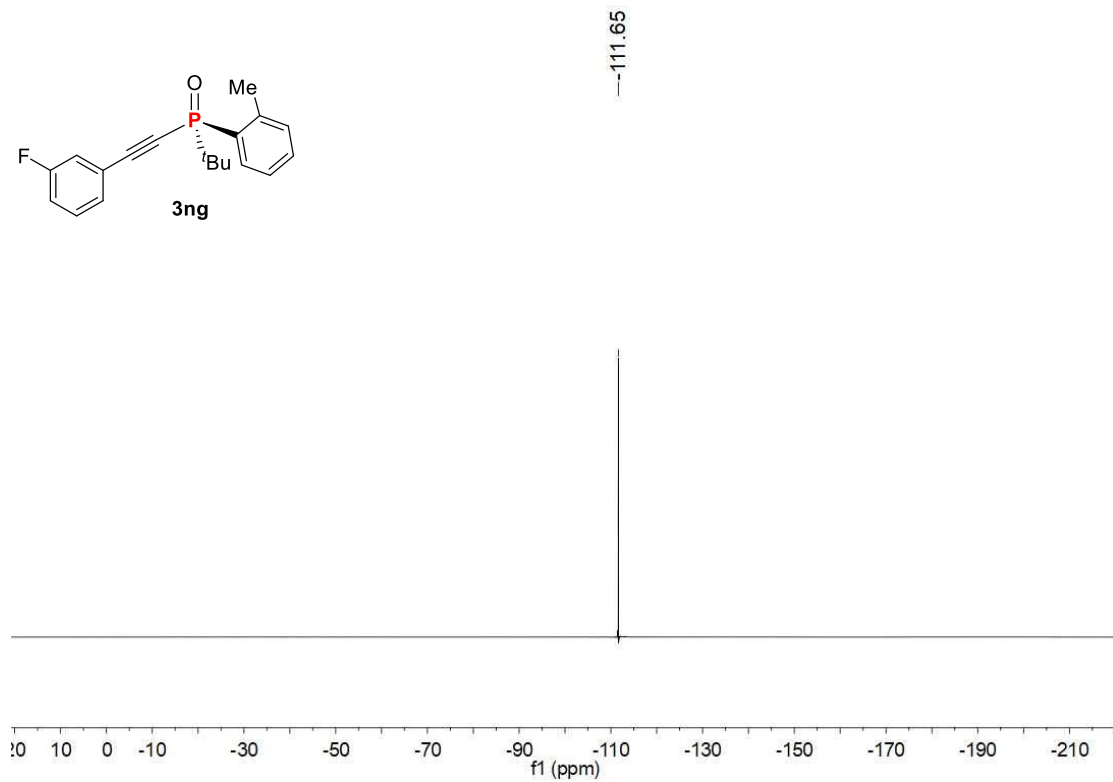

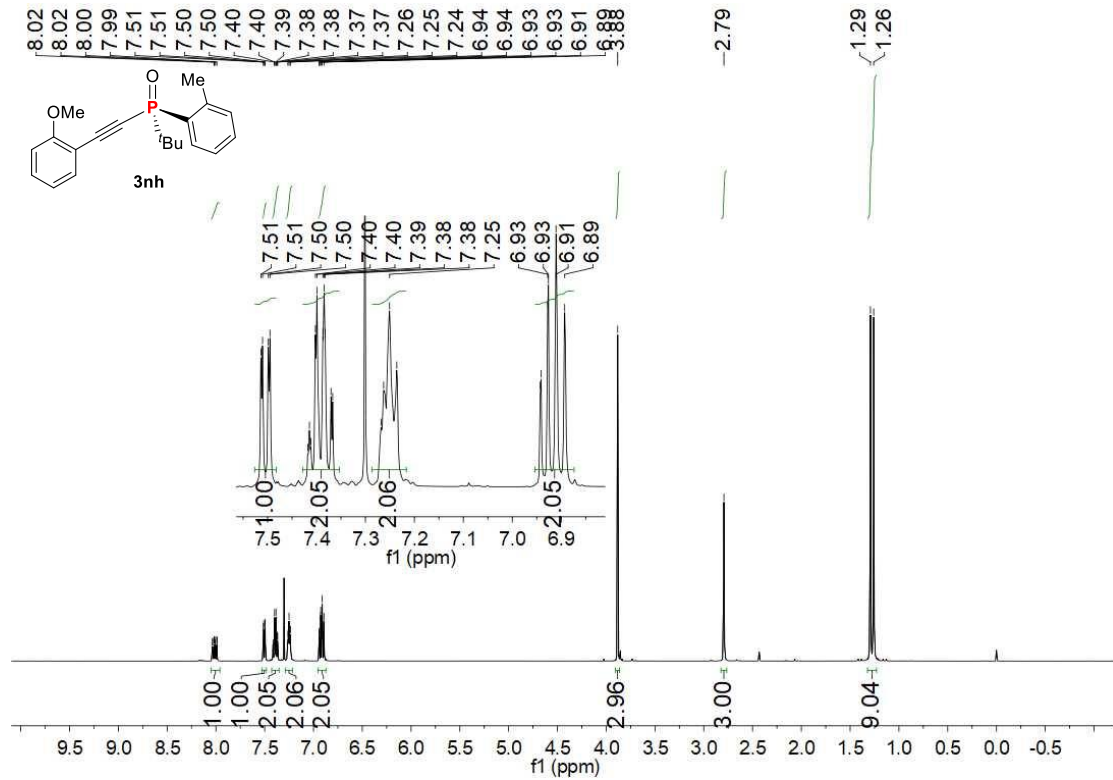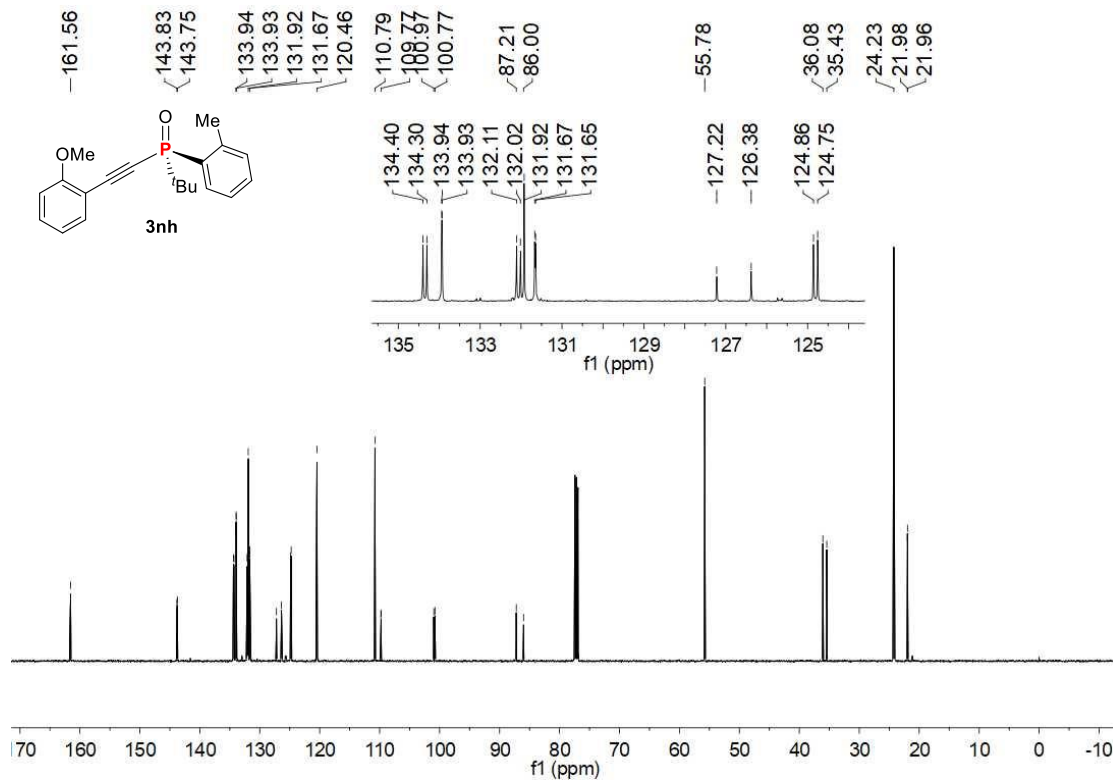



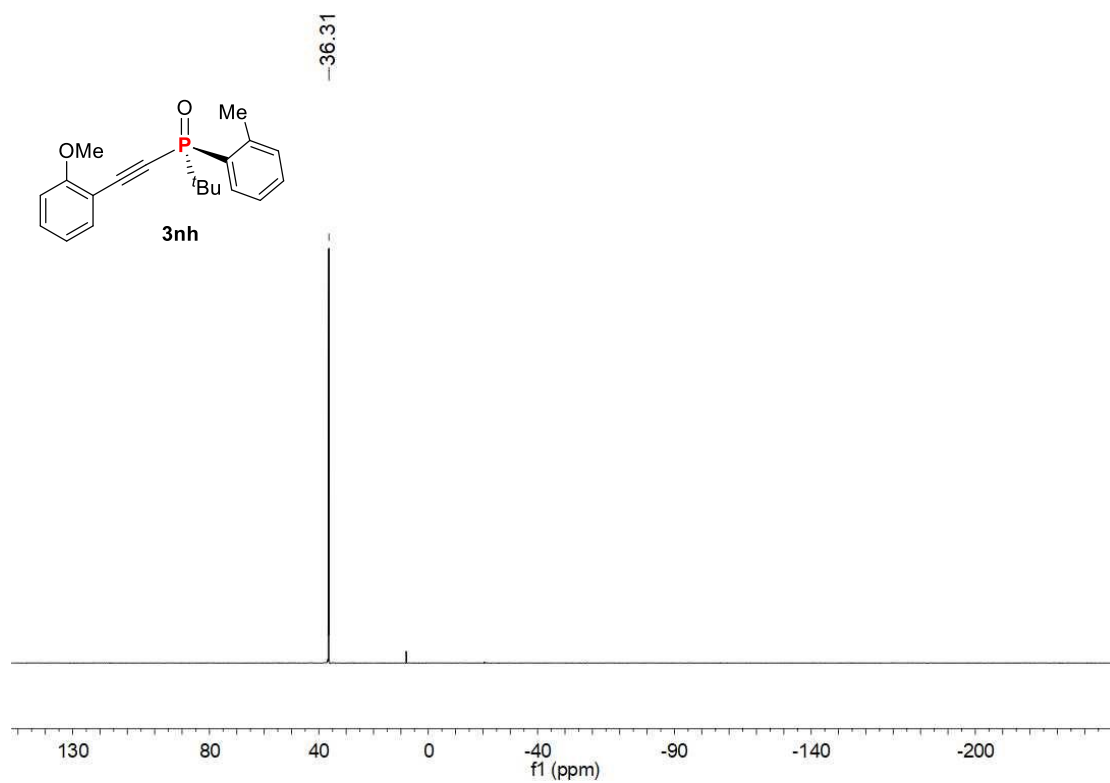

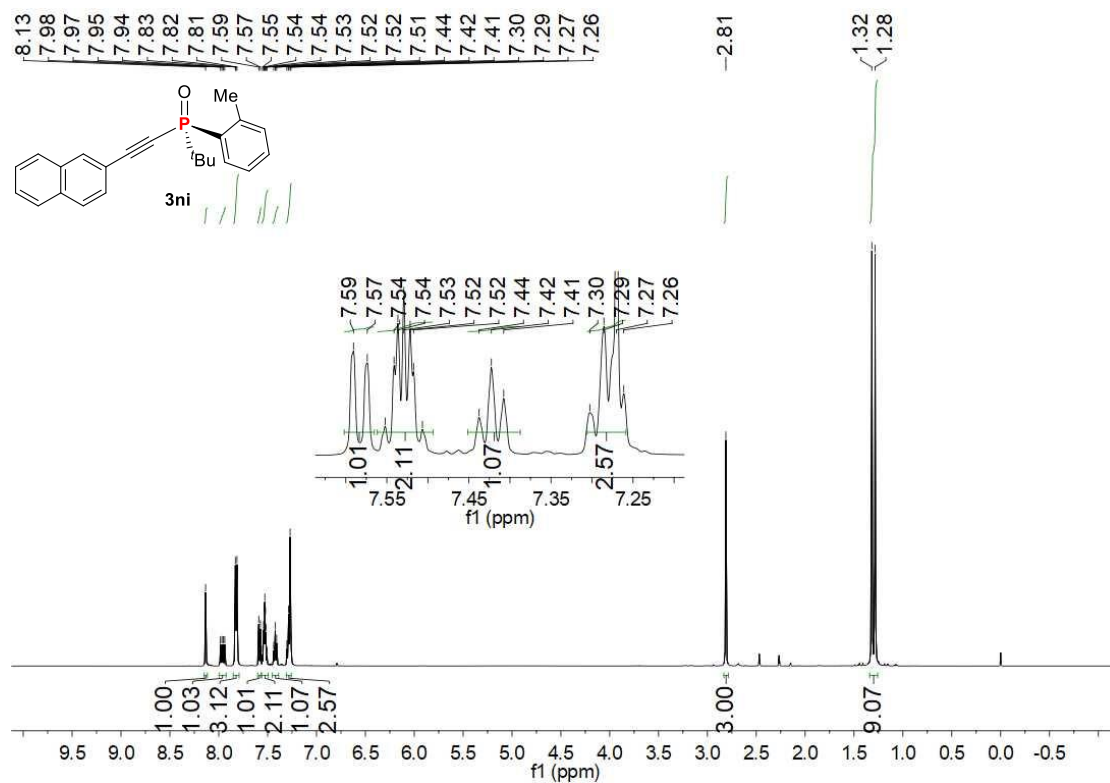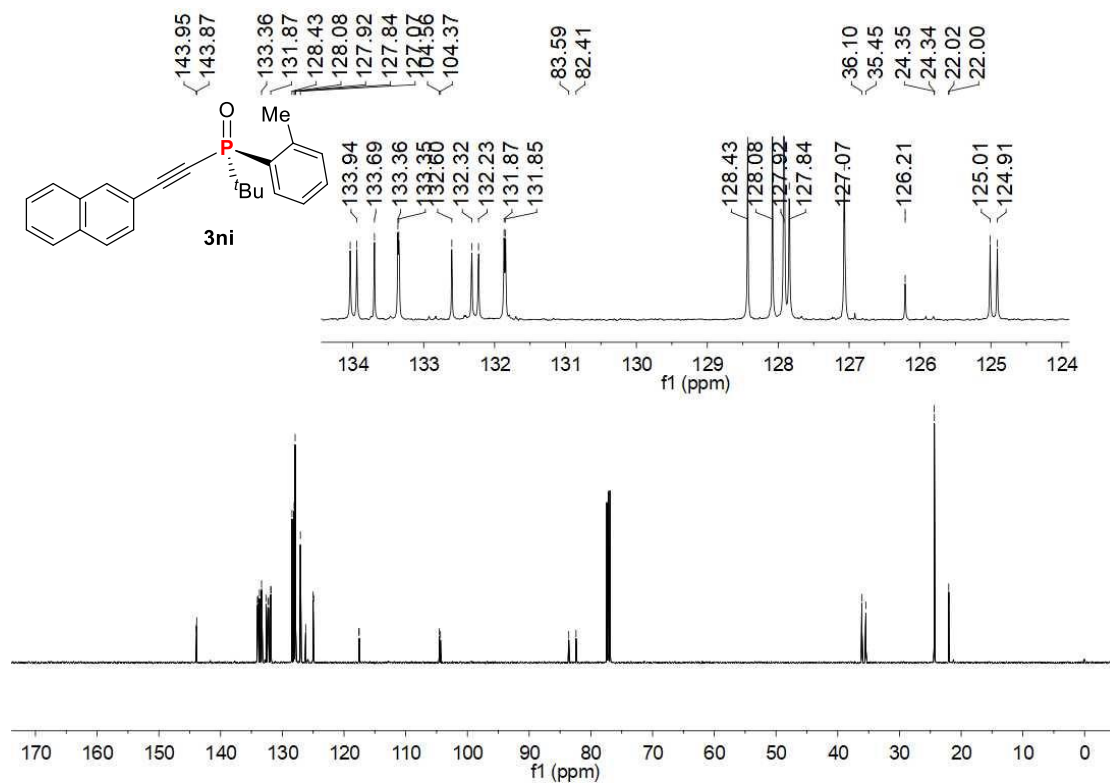

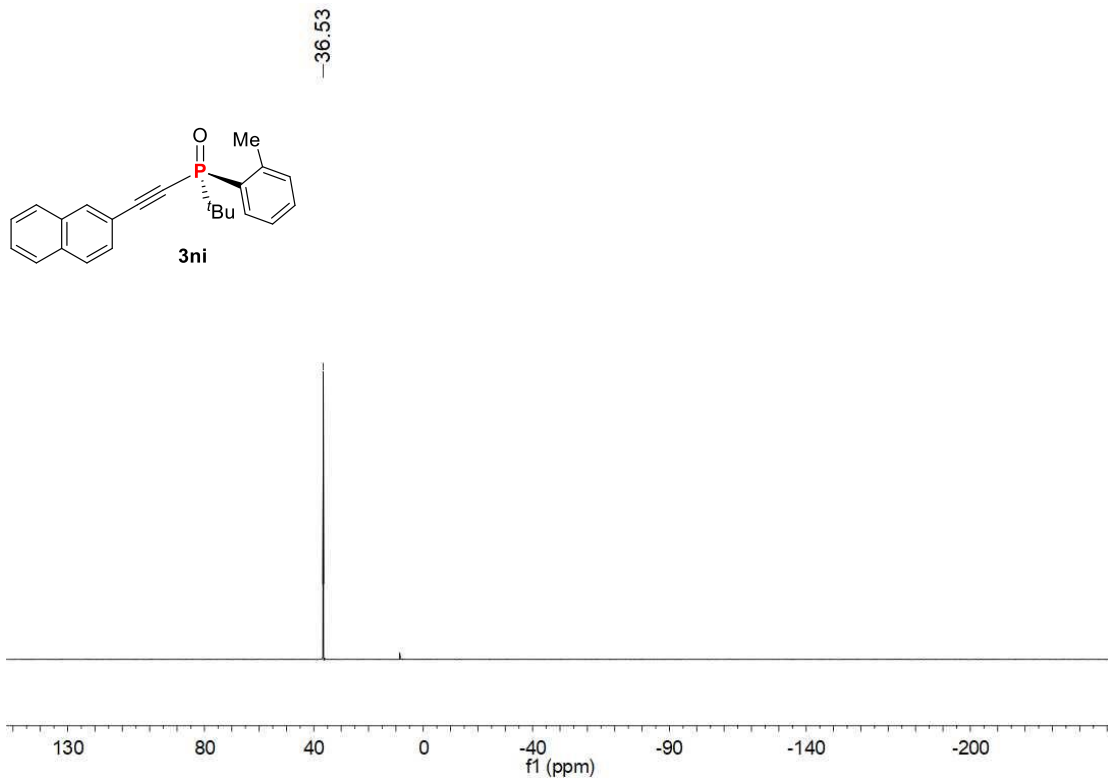

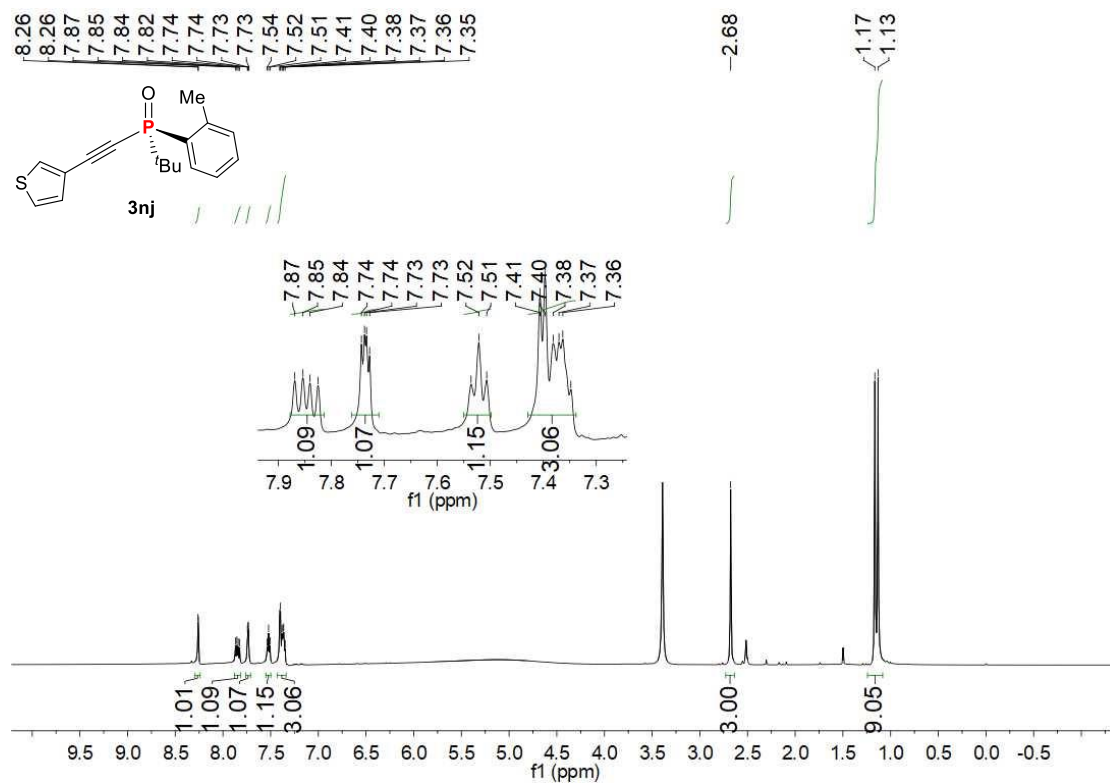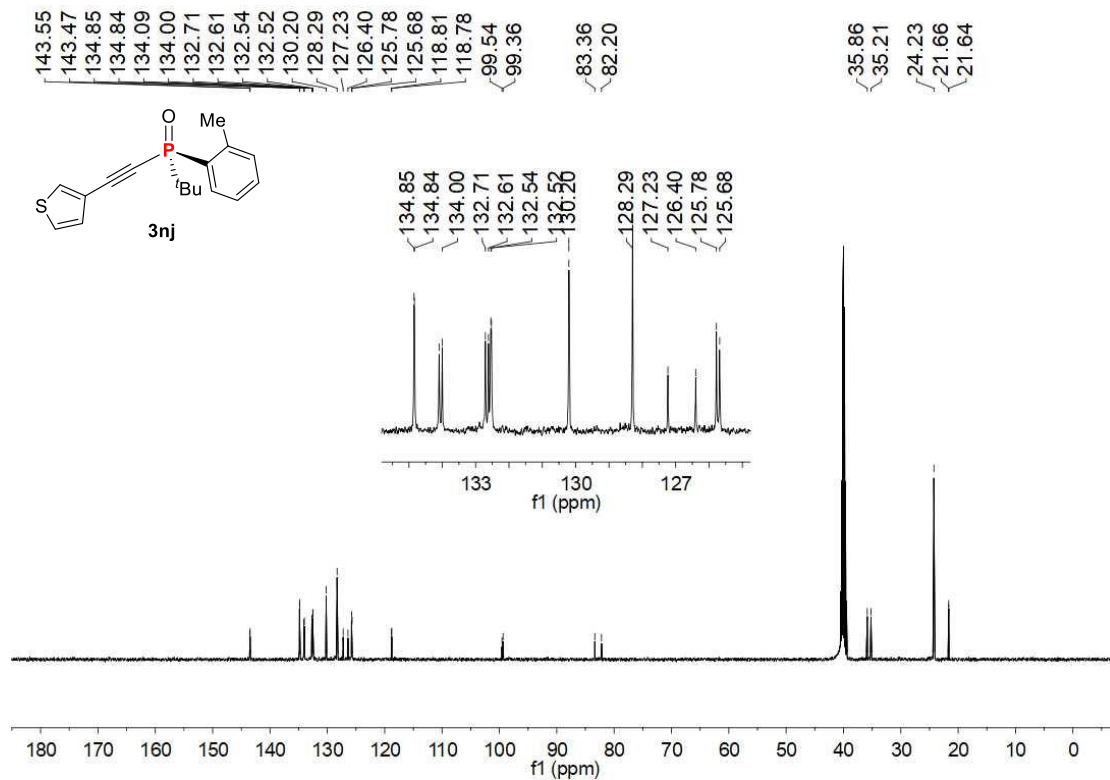

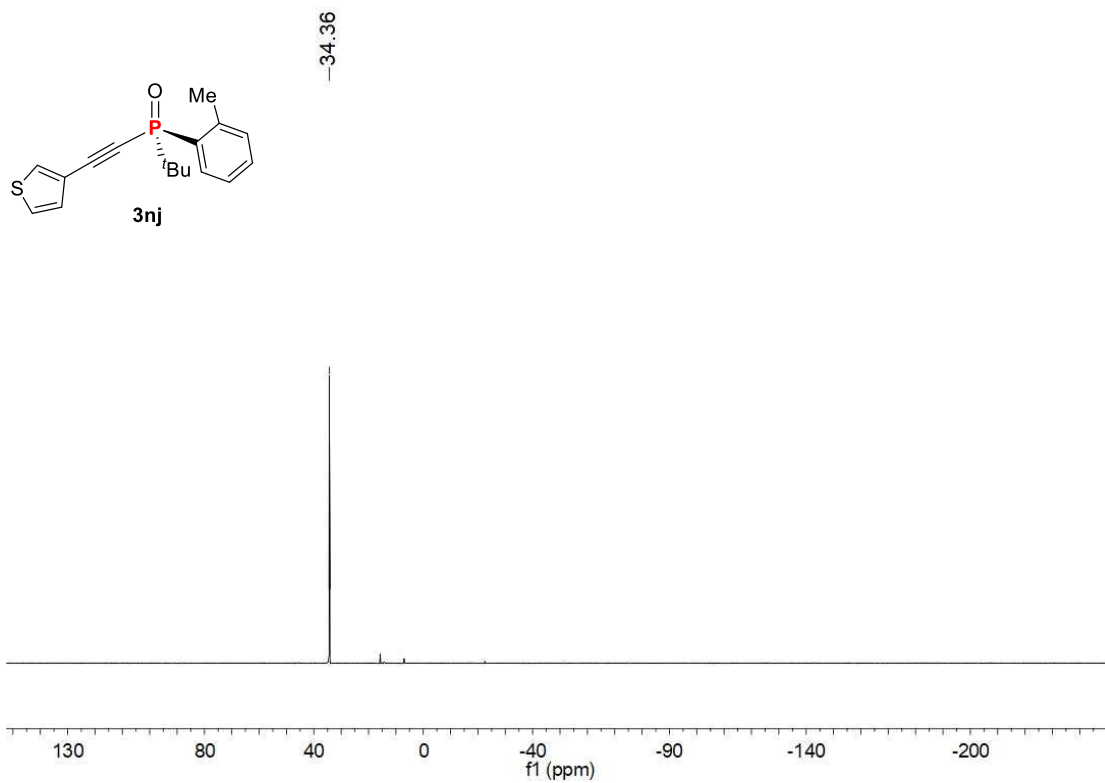

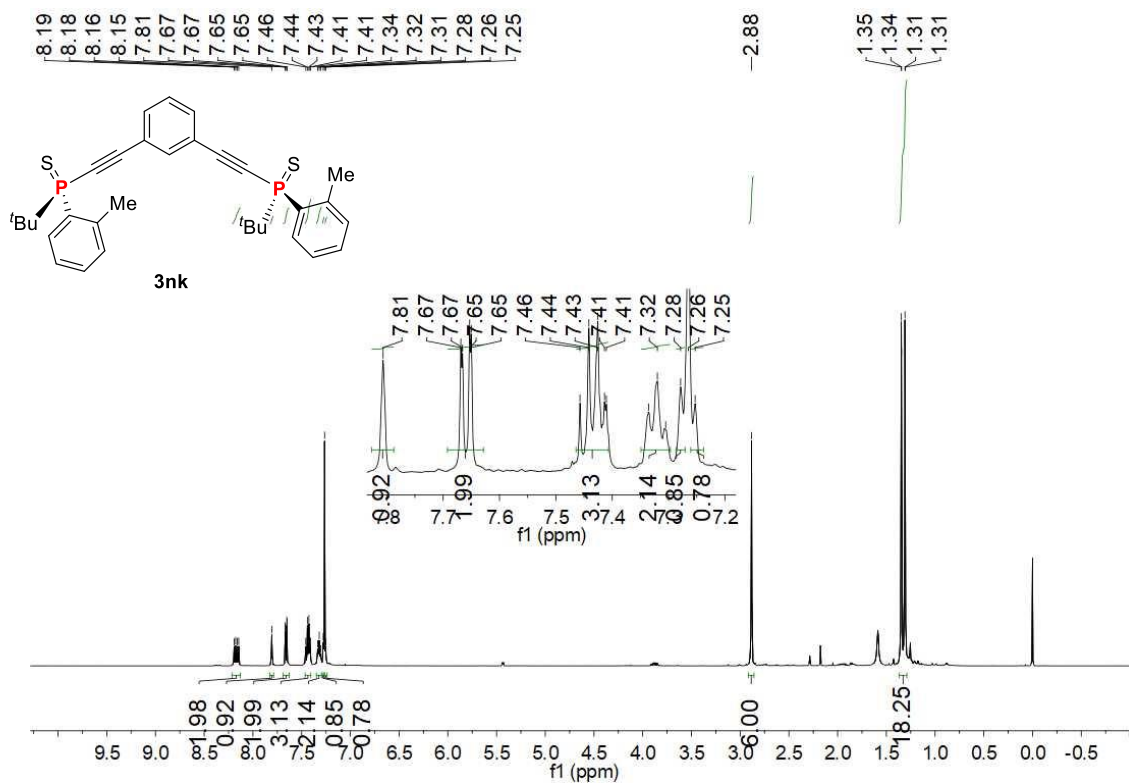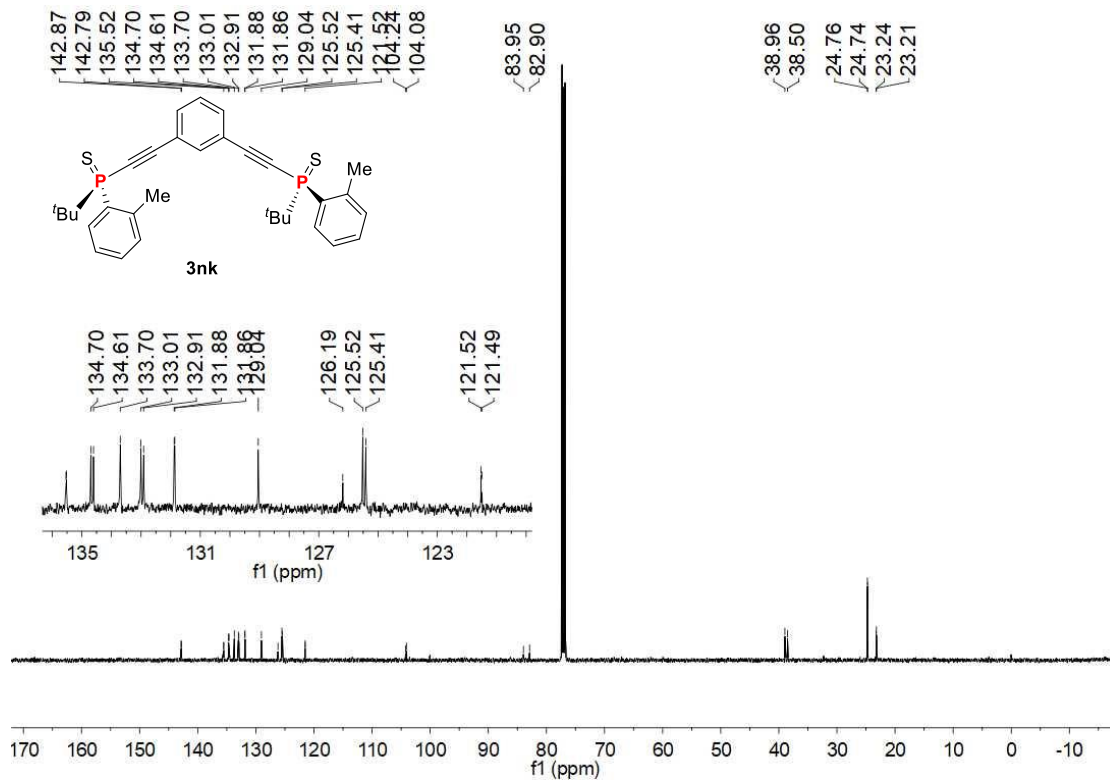

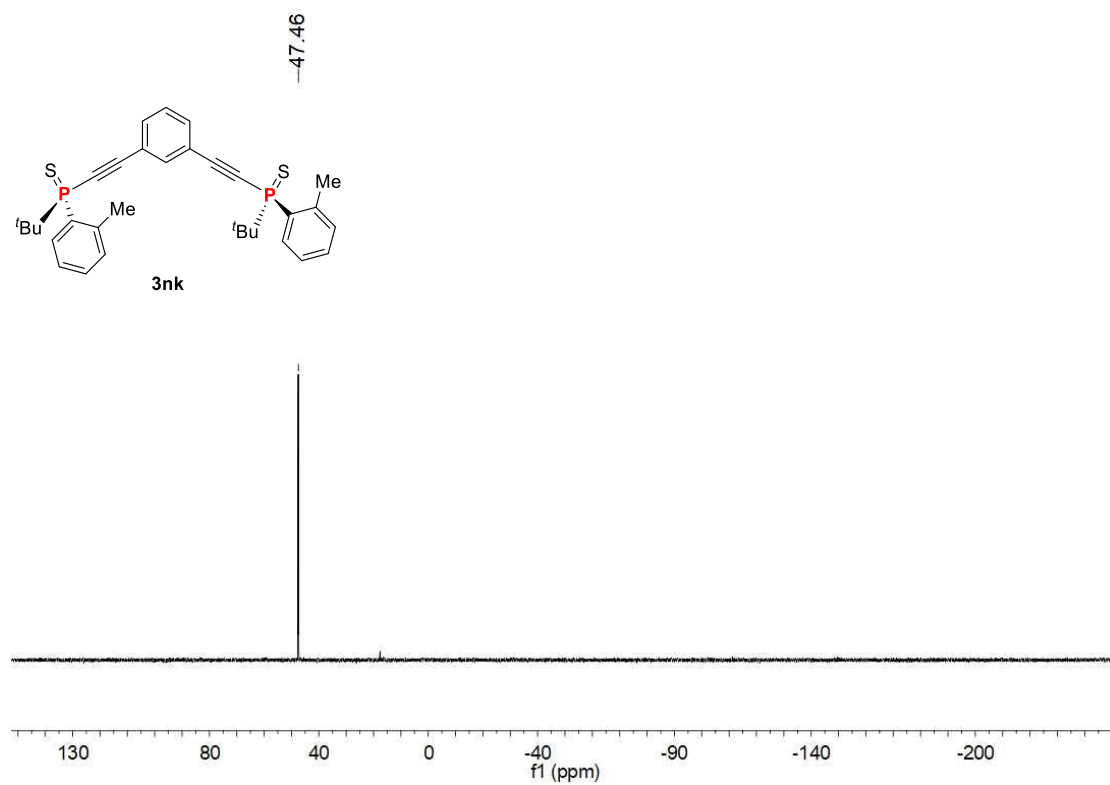

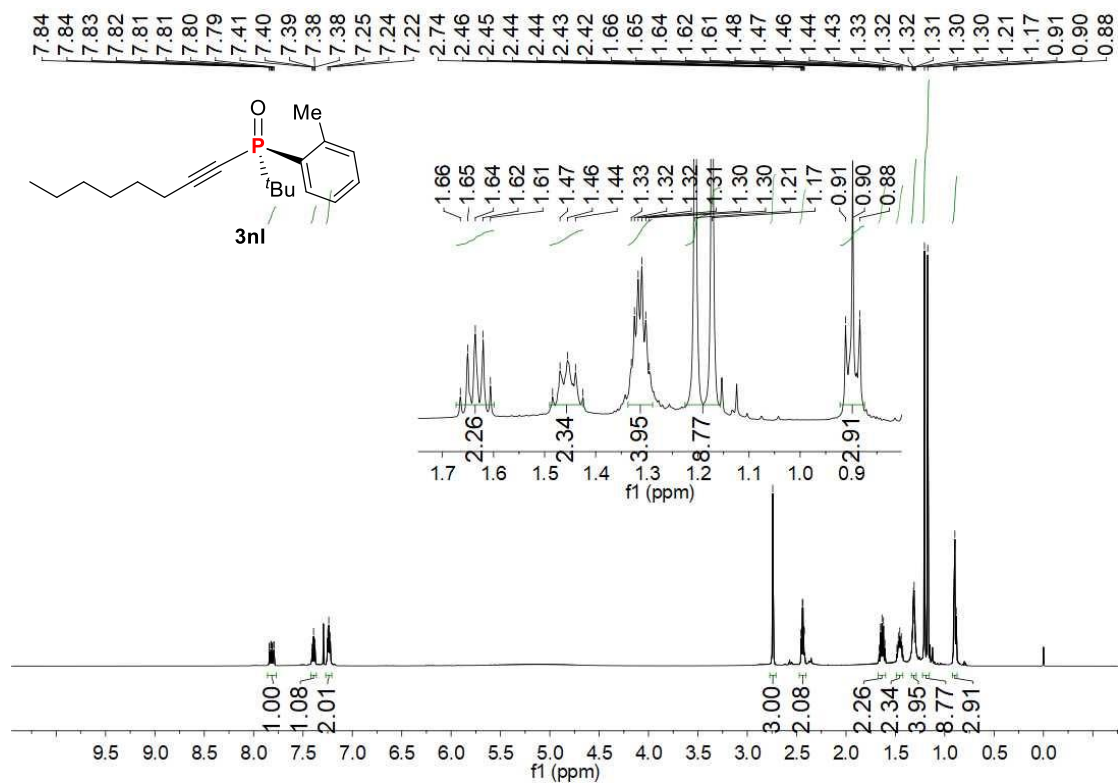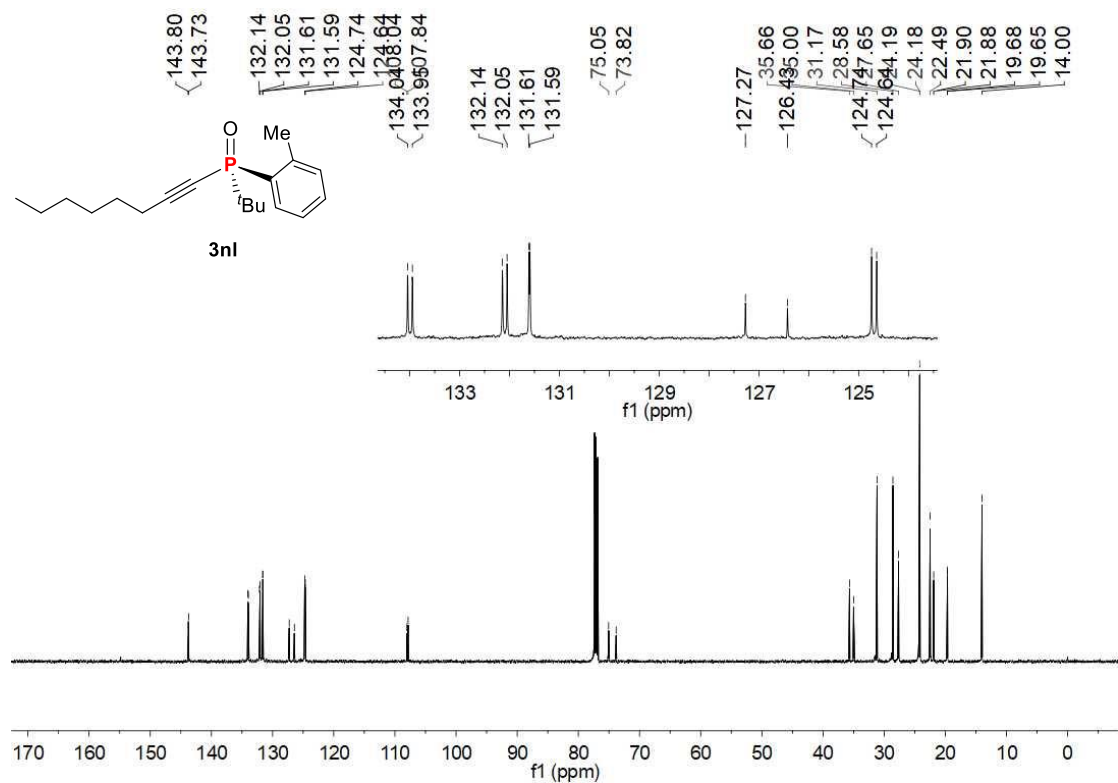



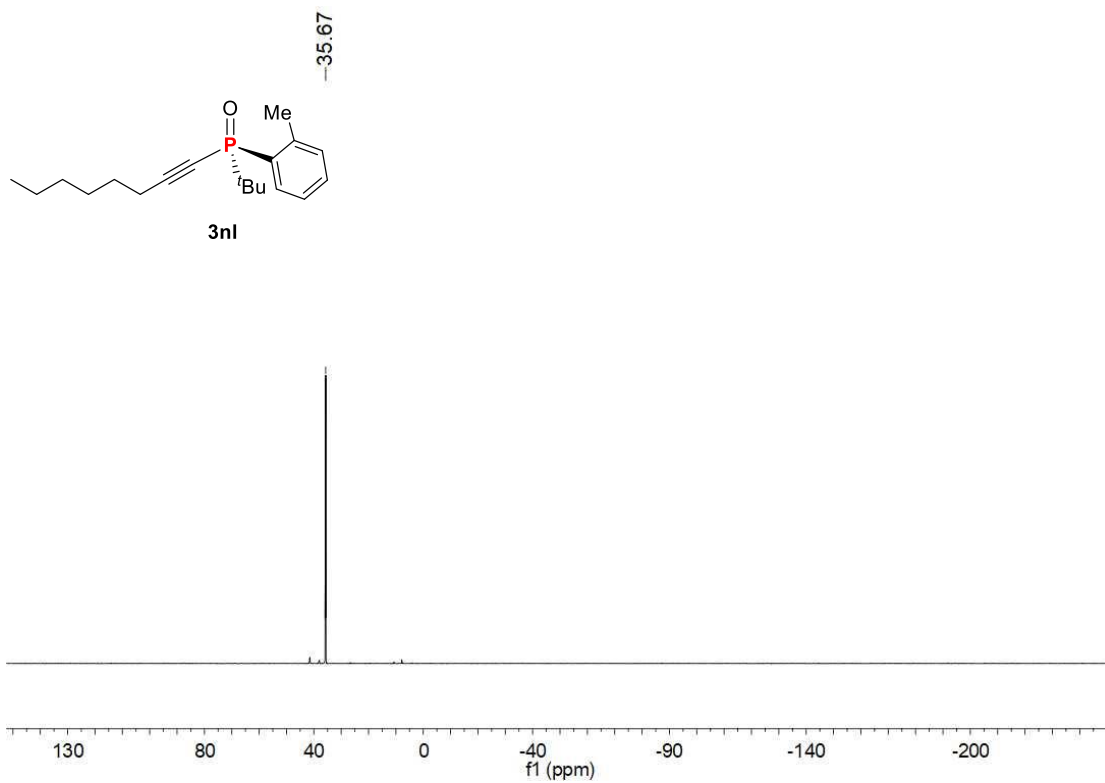

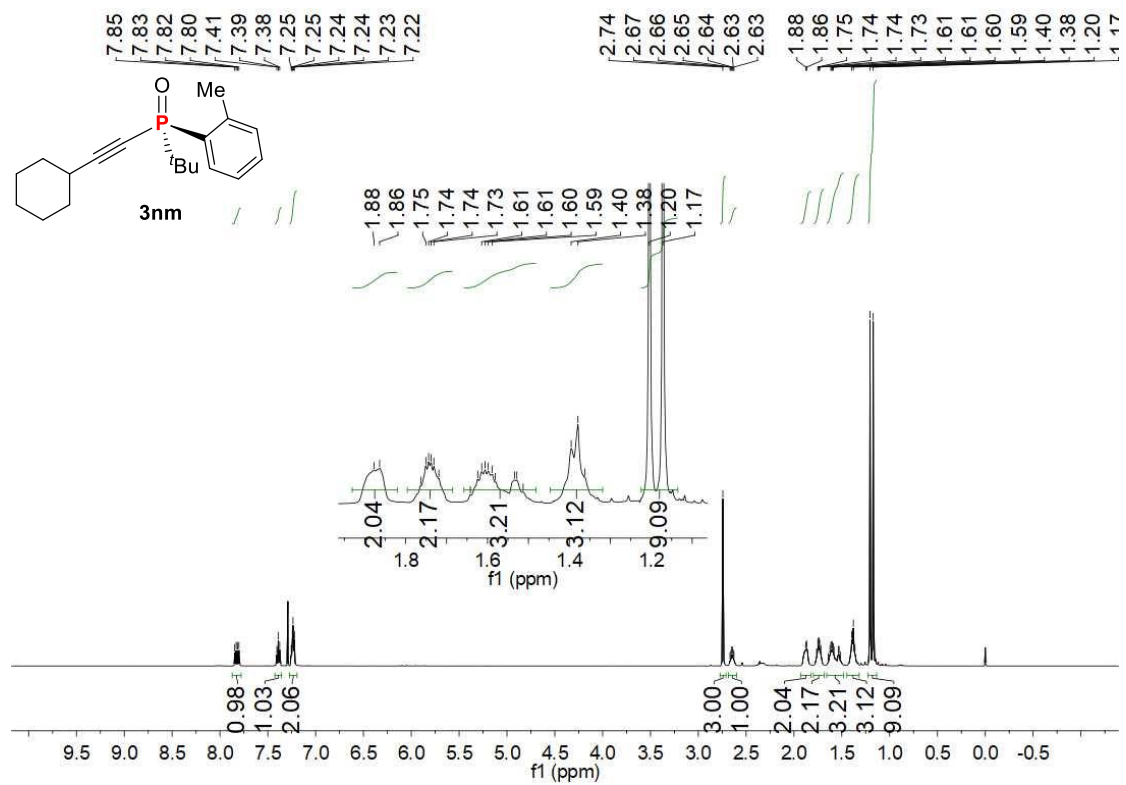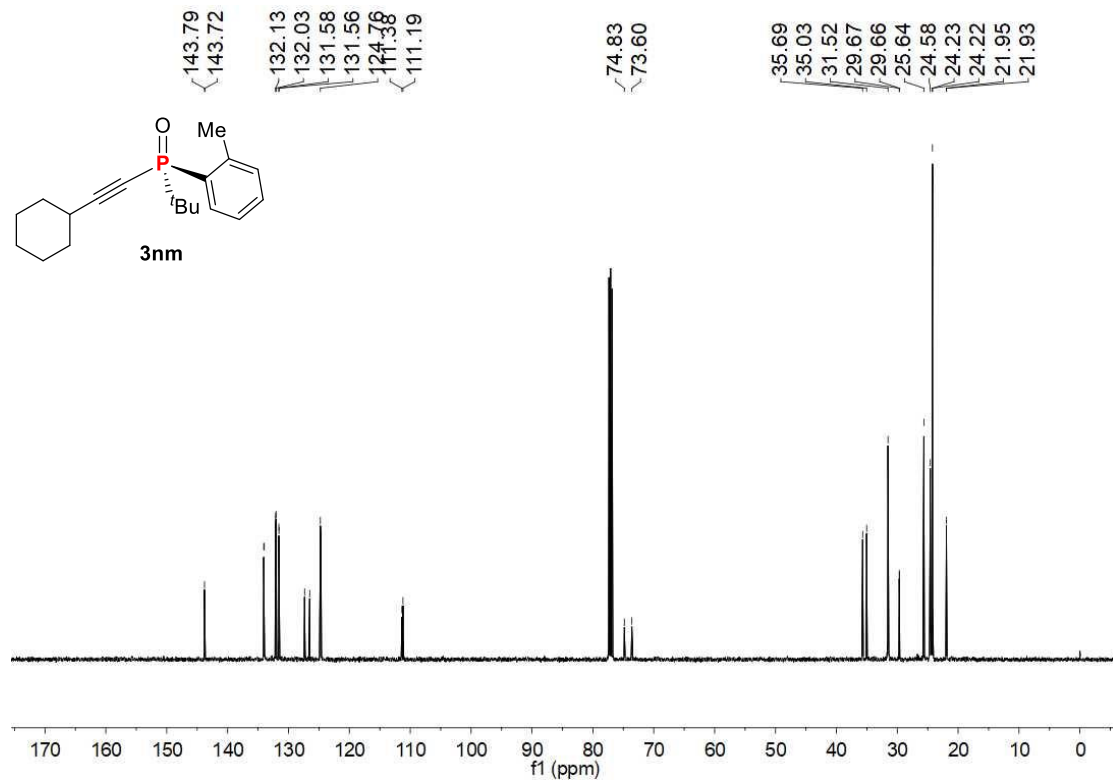

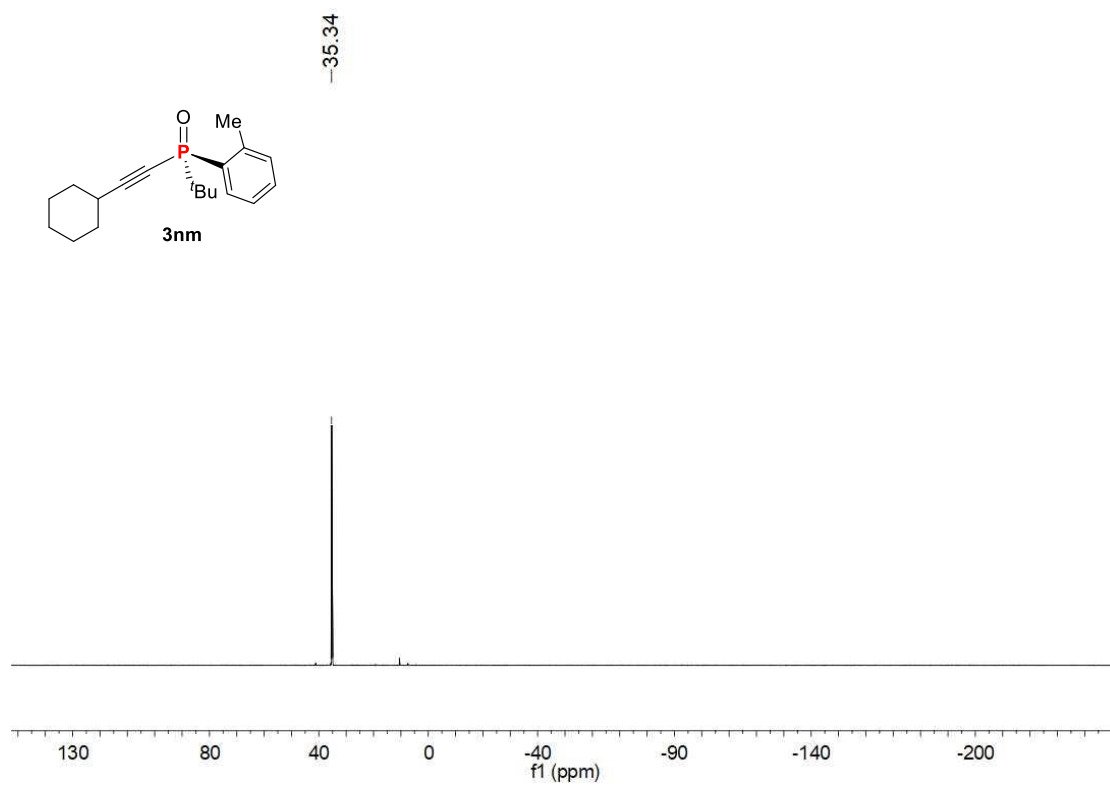

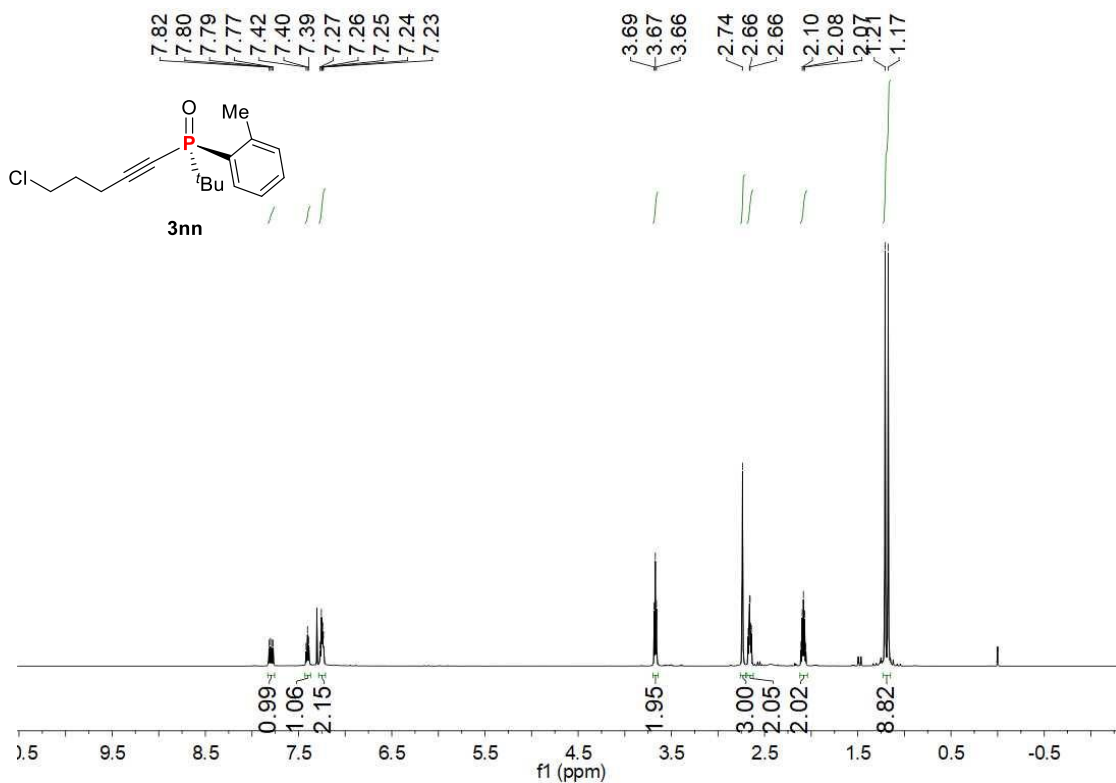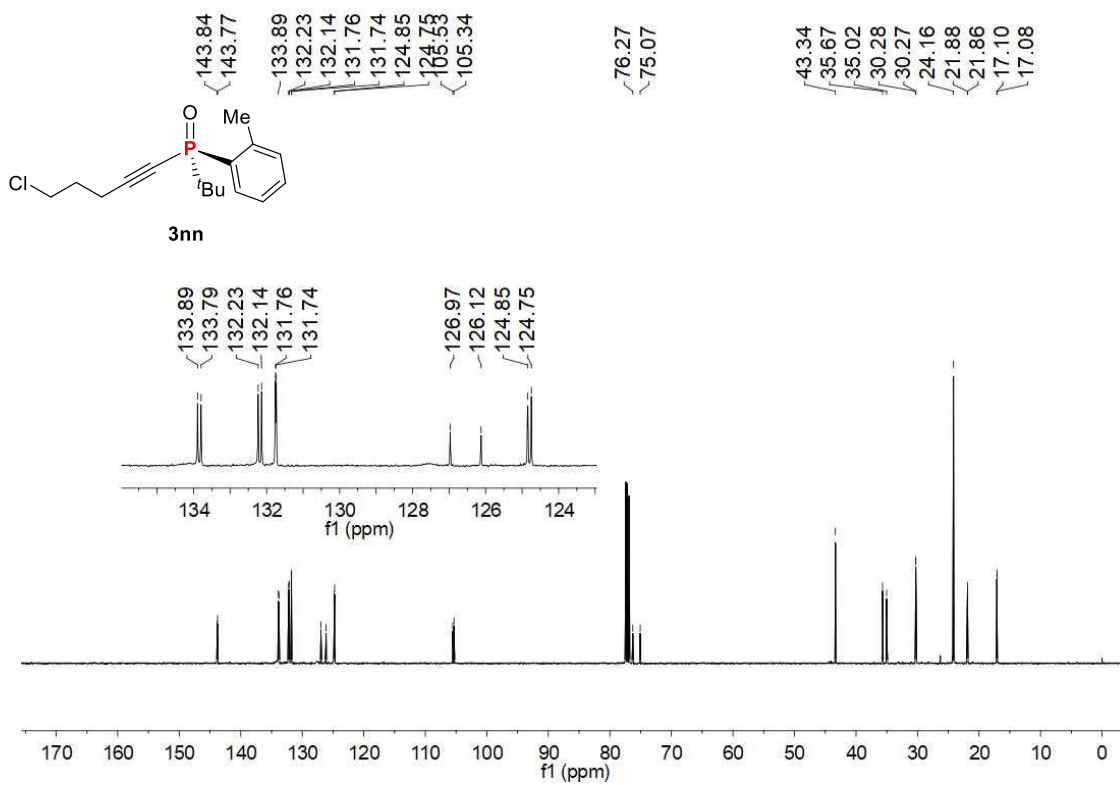

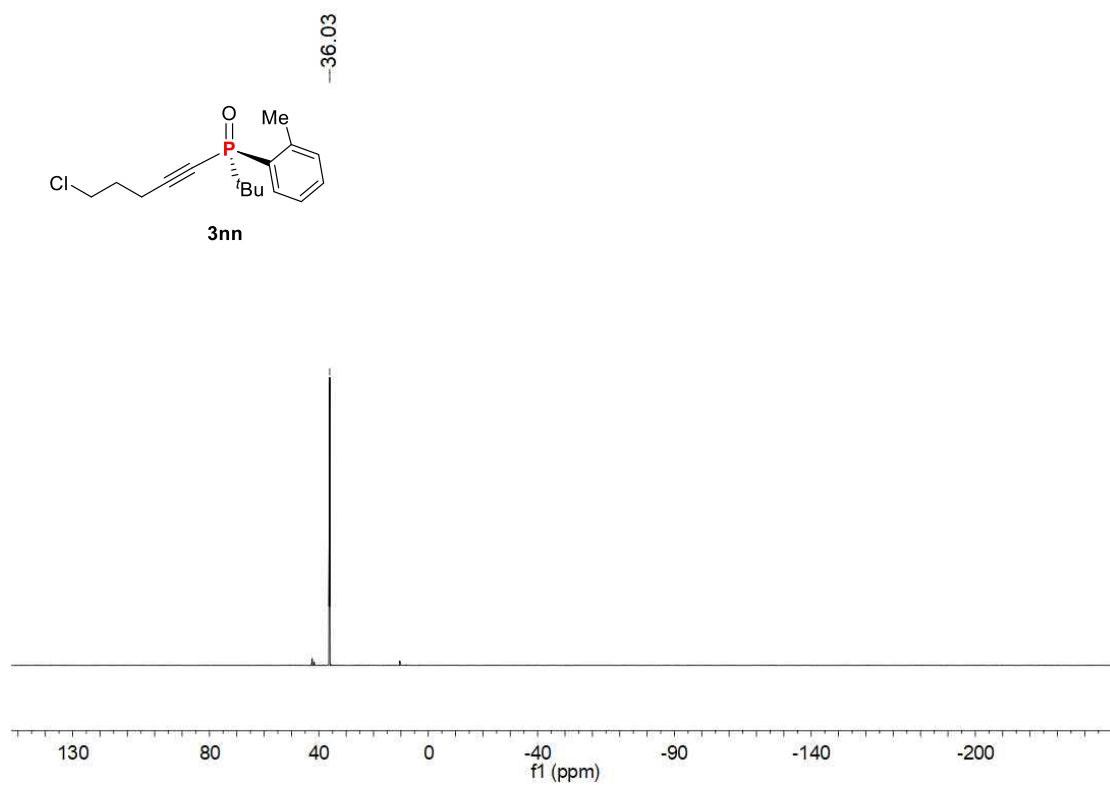

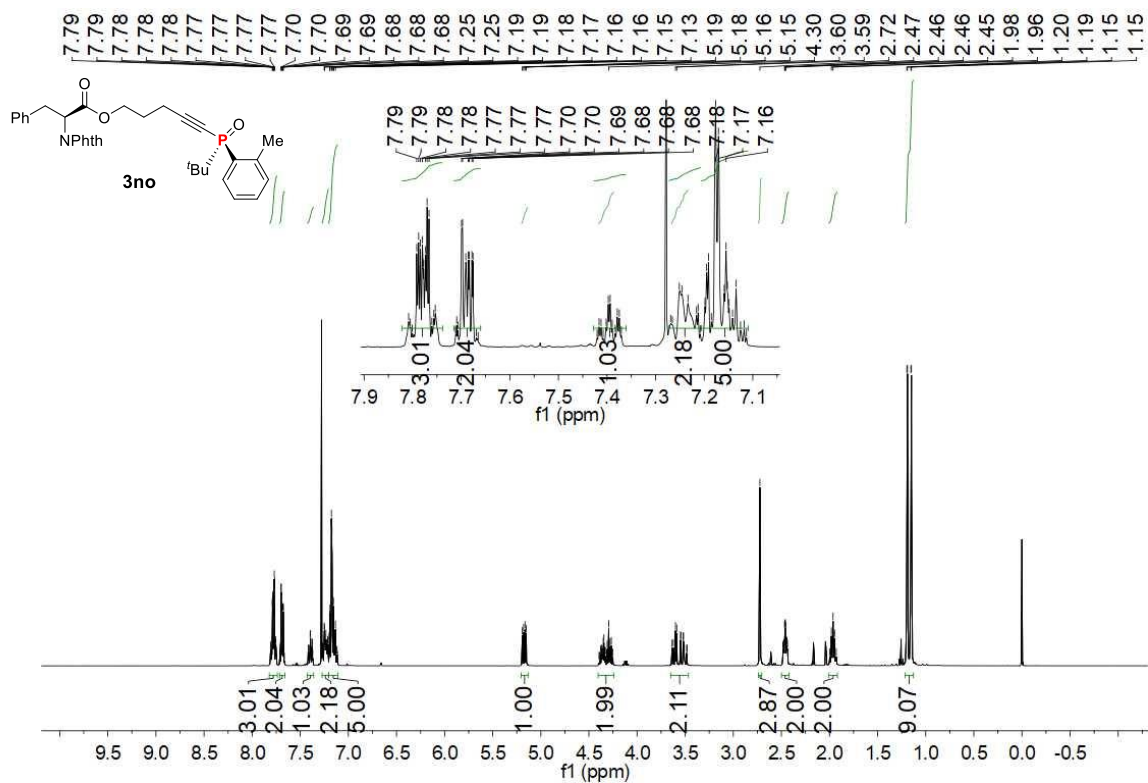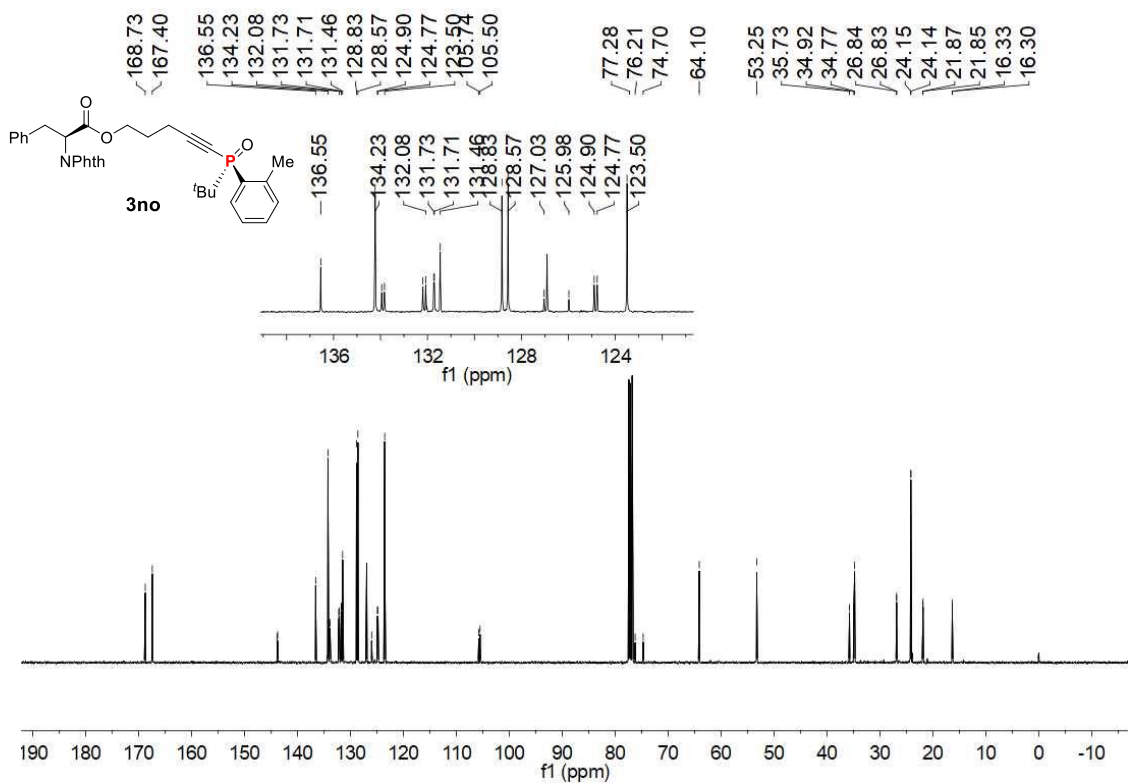

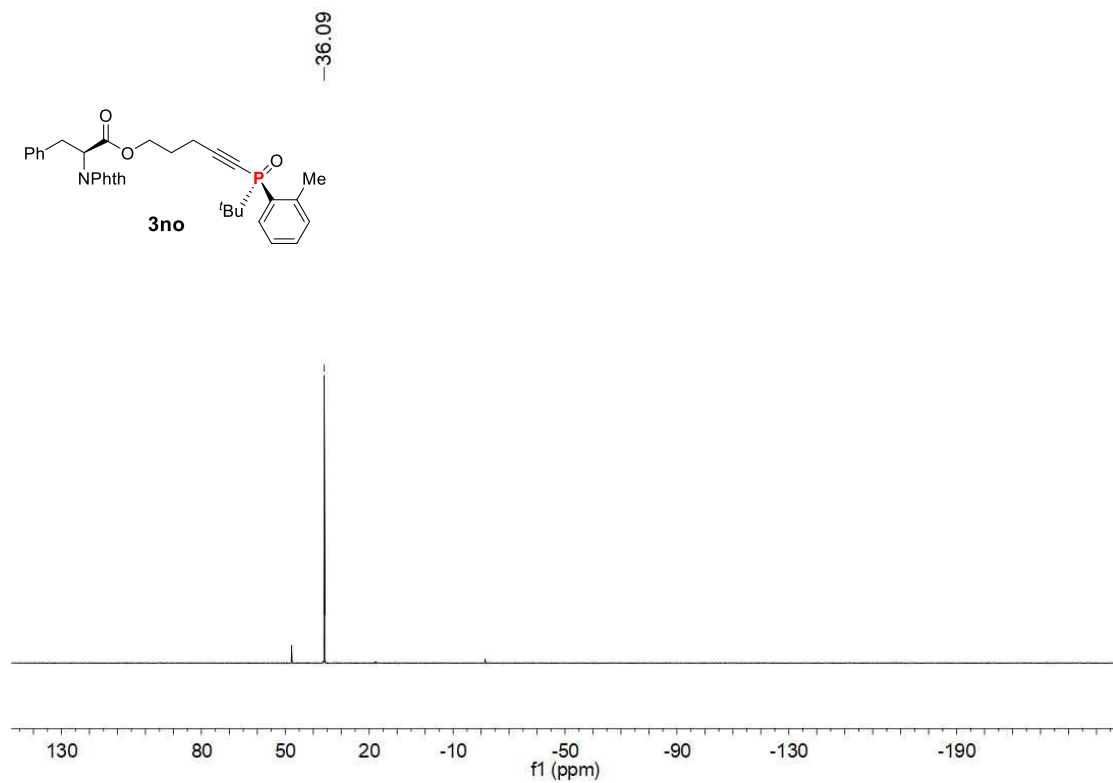

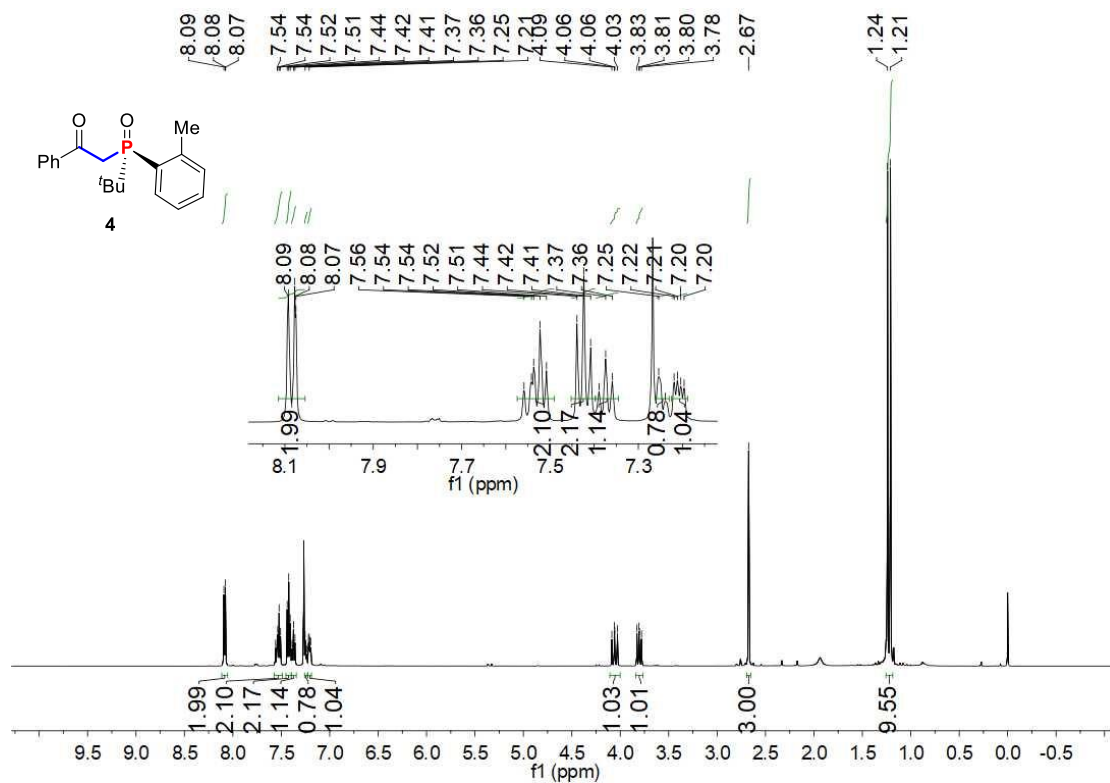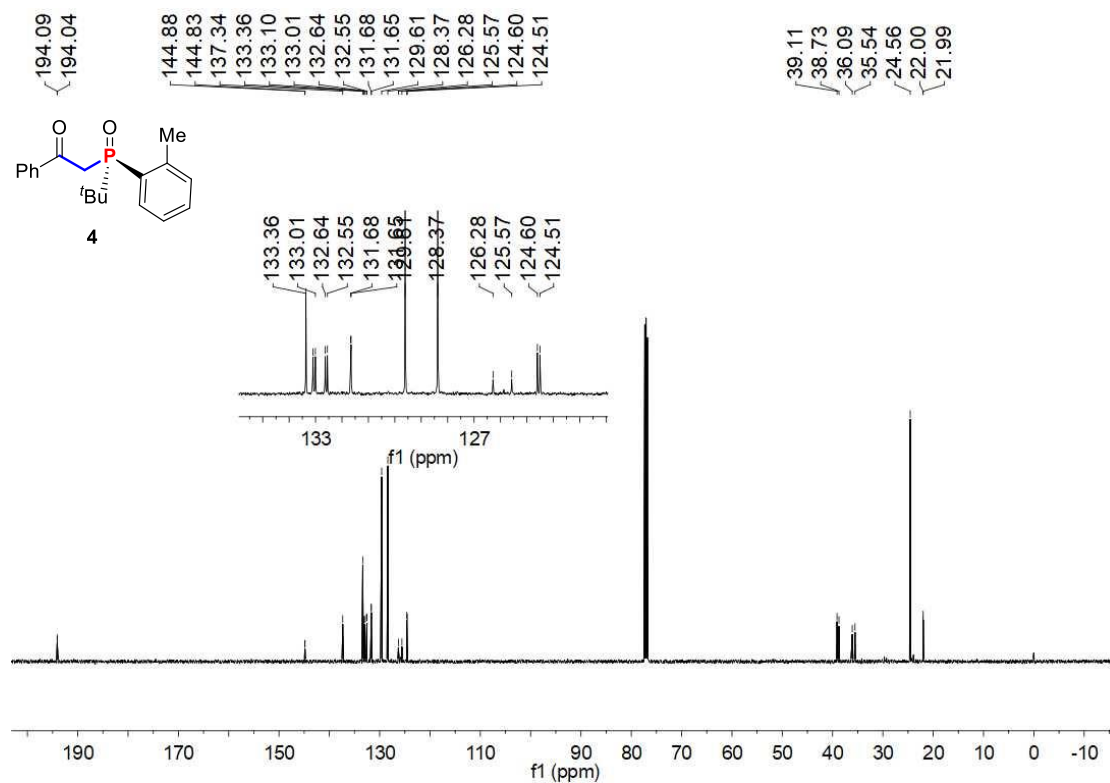



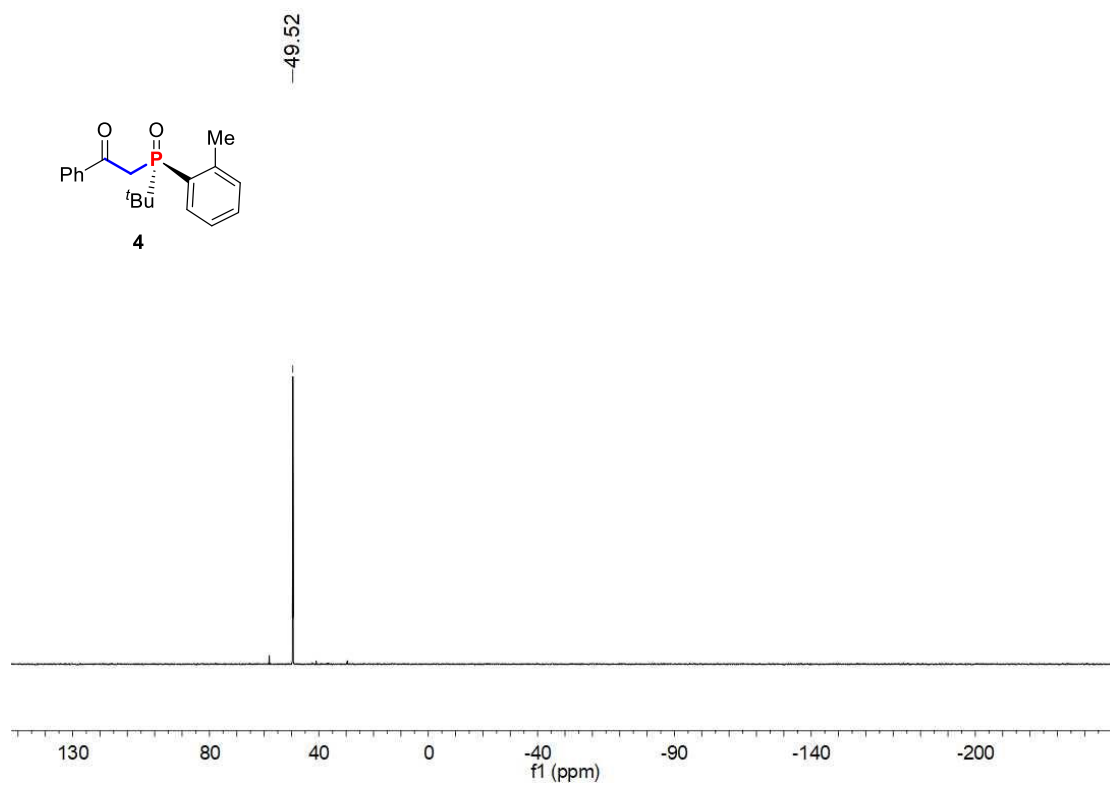

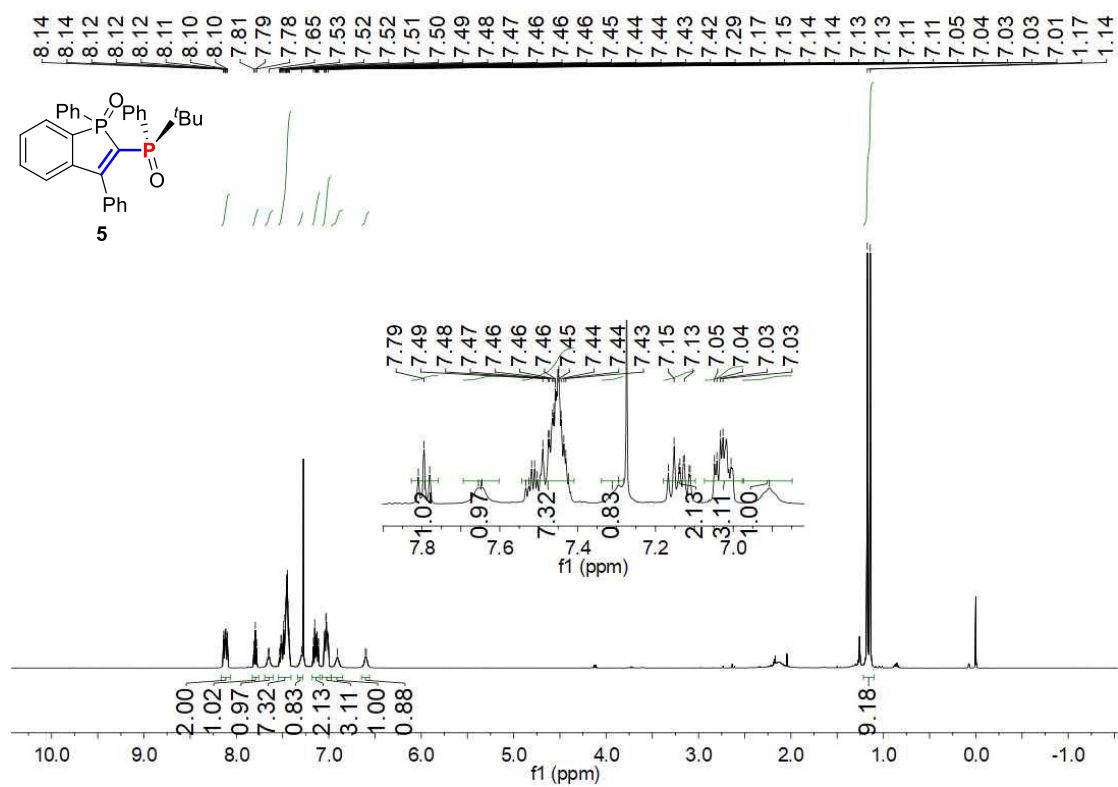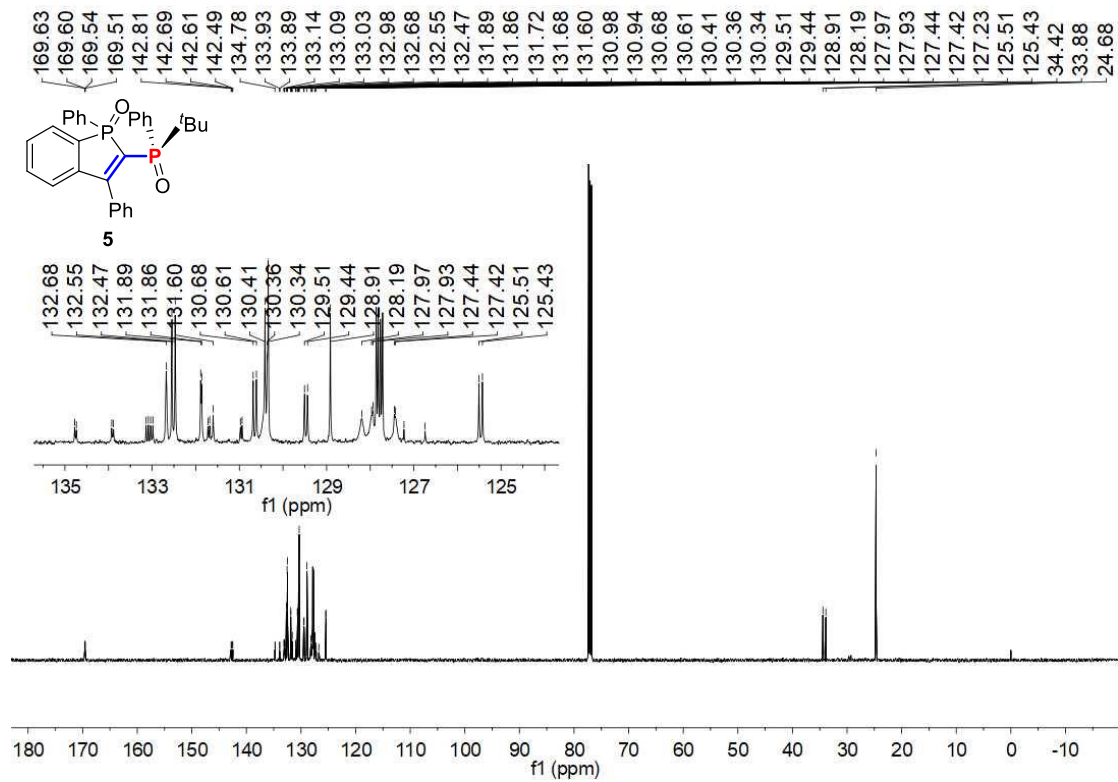

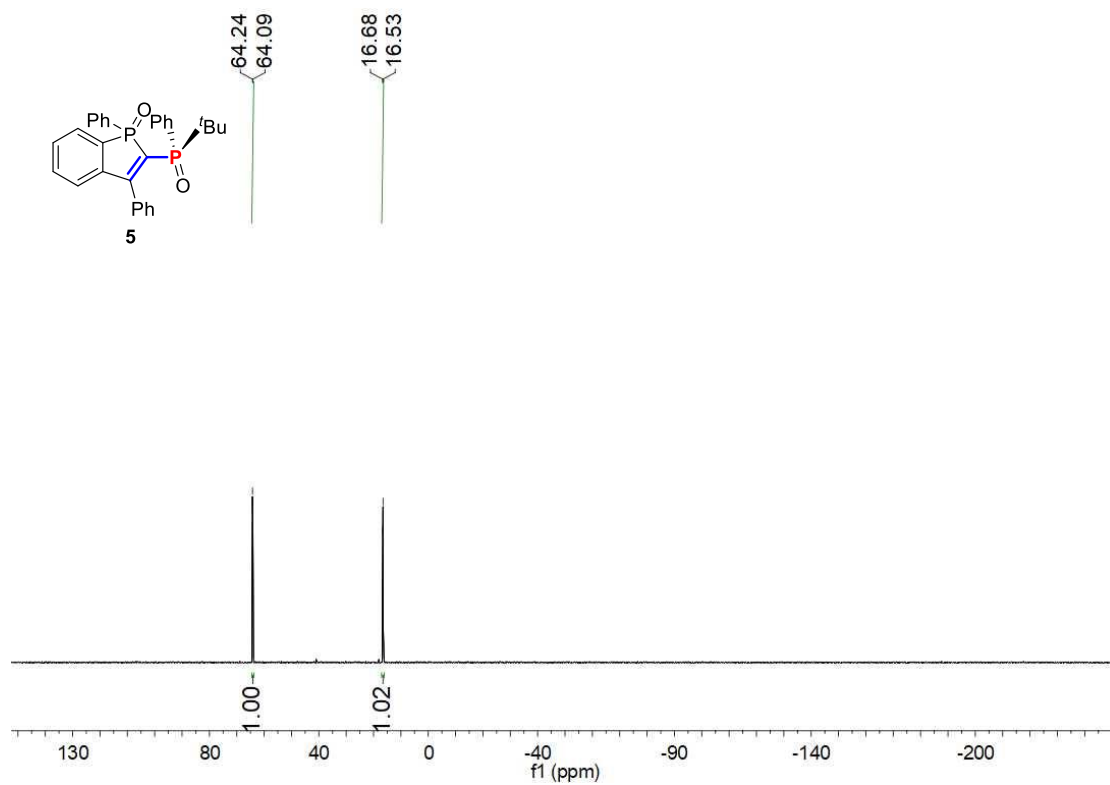

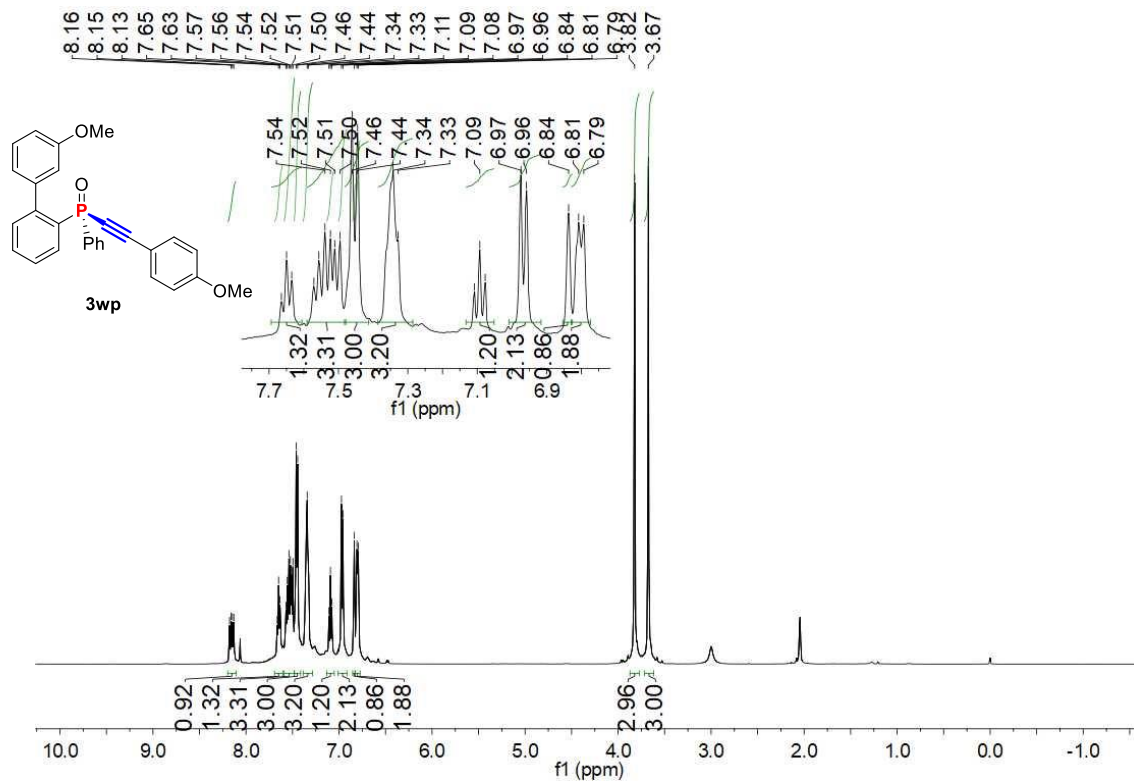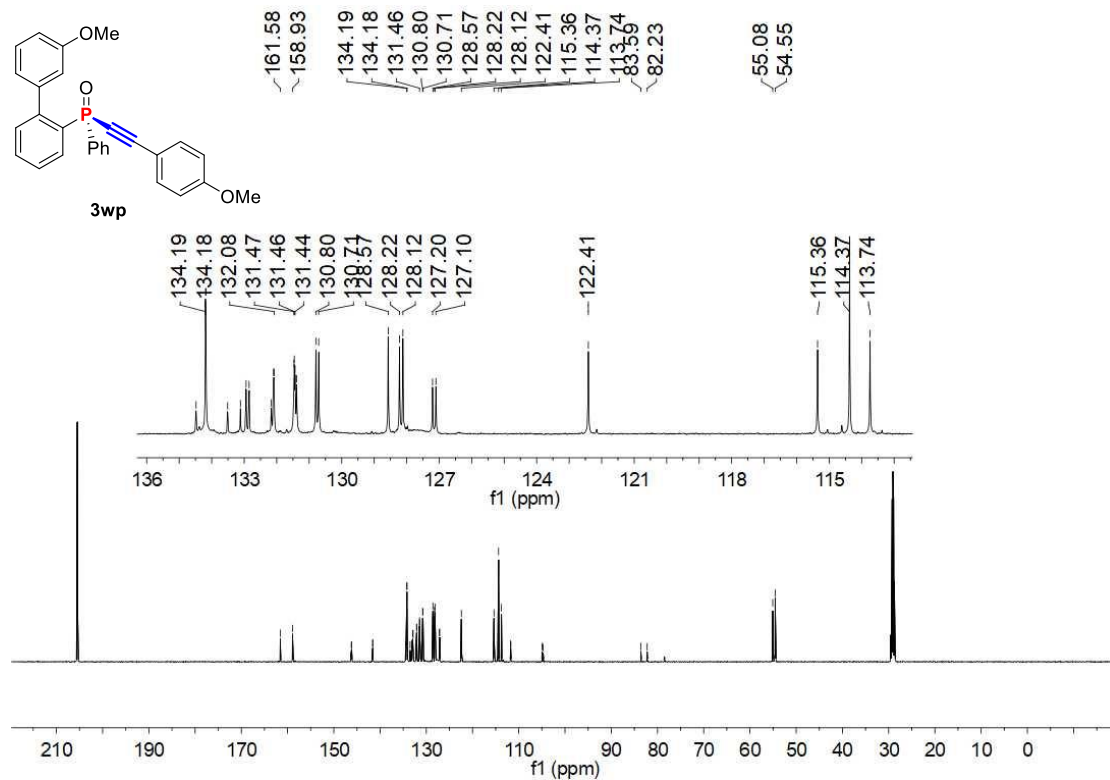

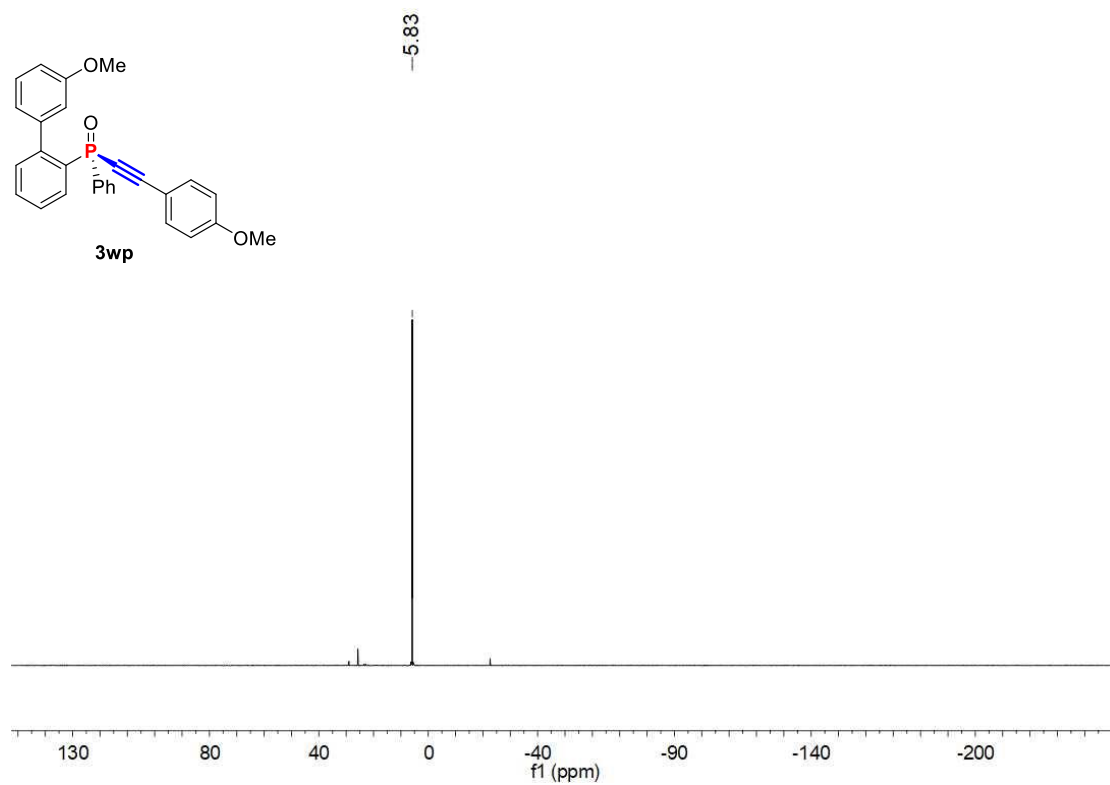

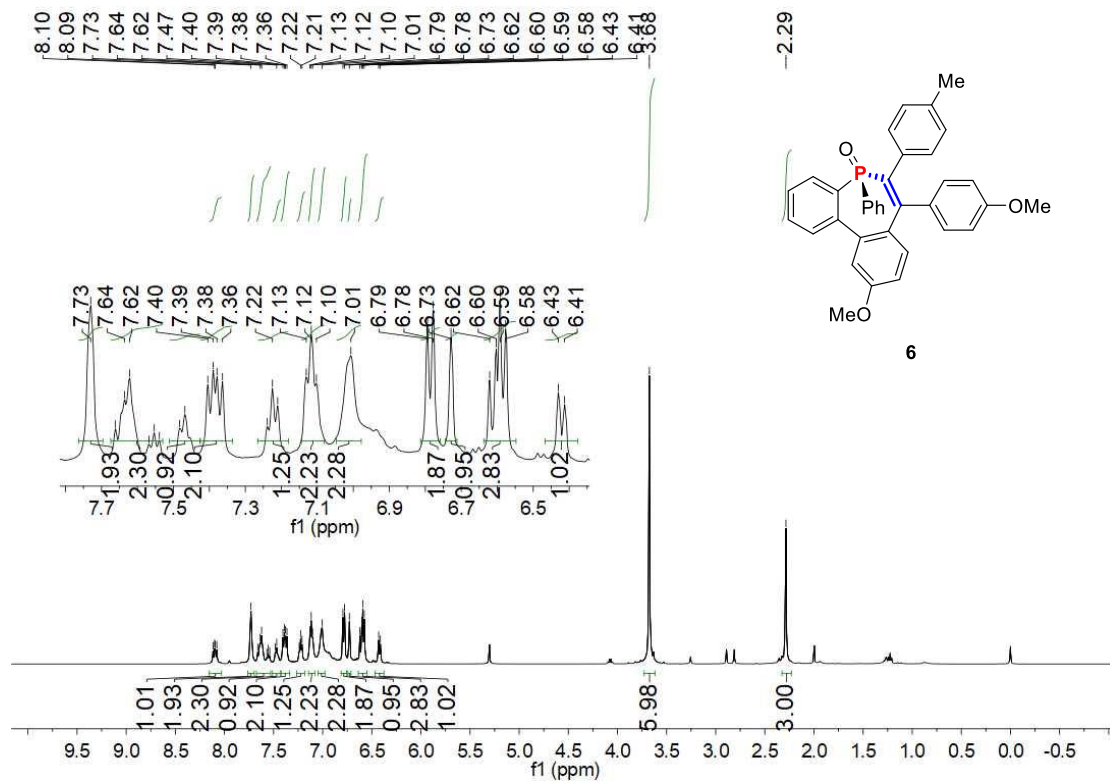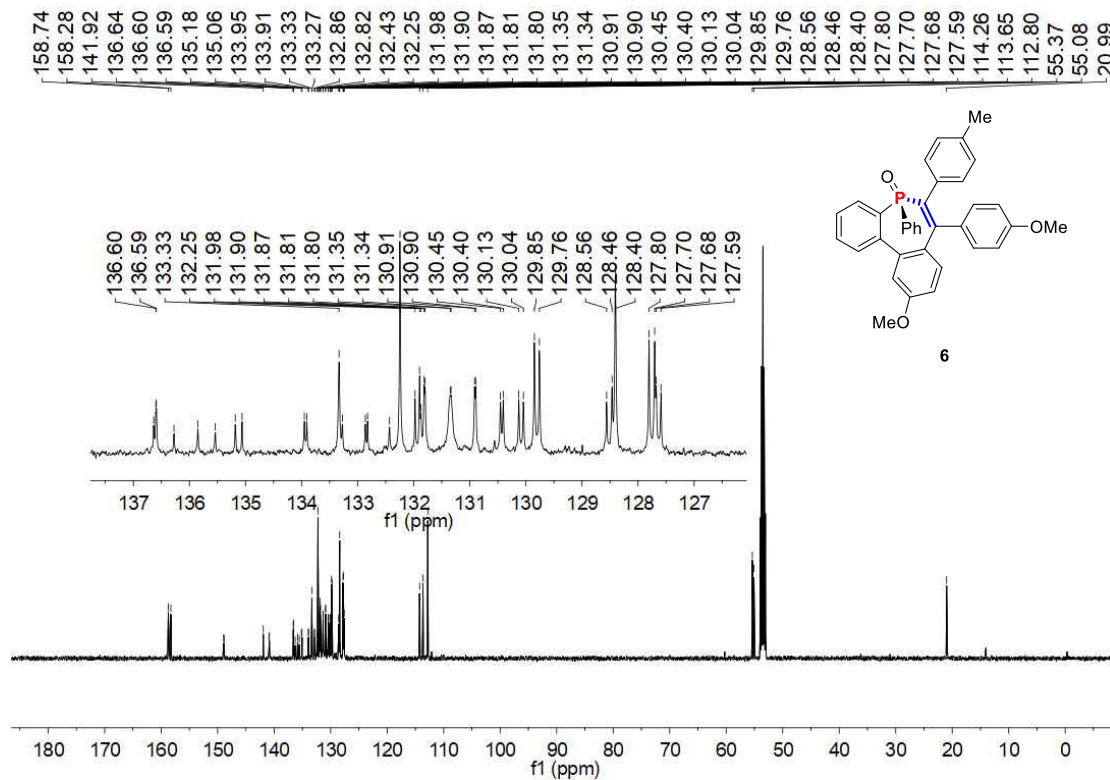

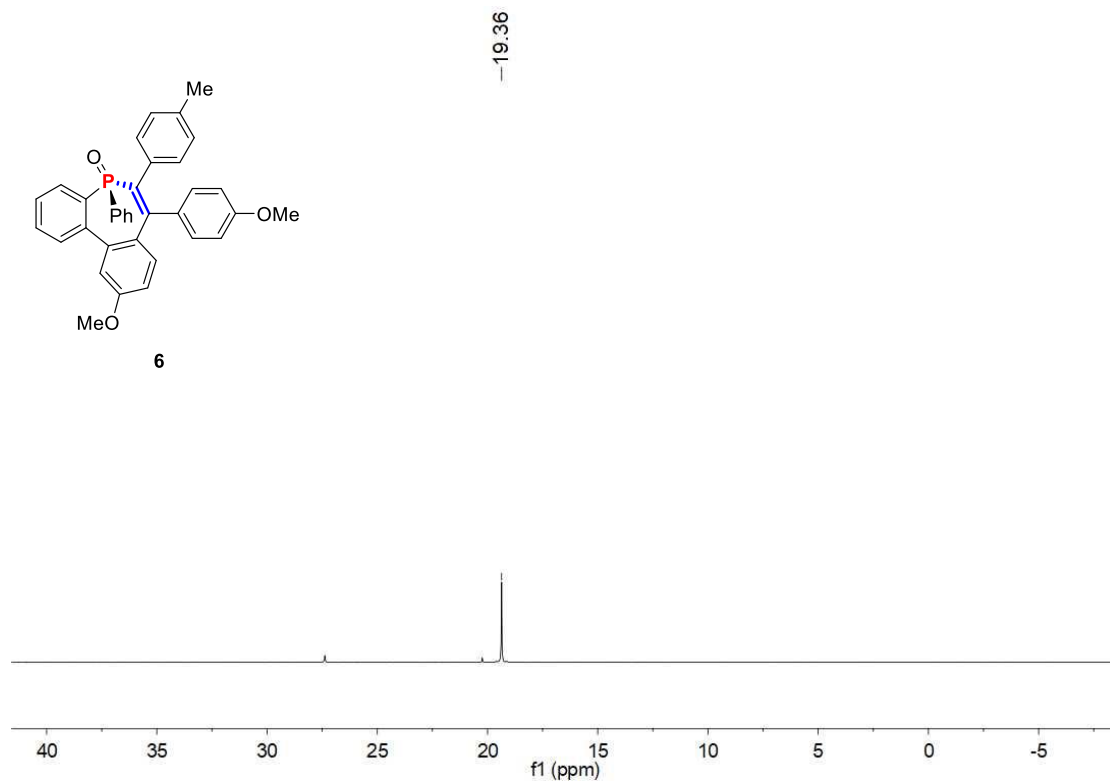

## 9. Copies of HPLC

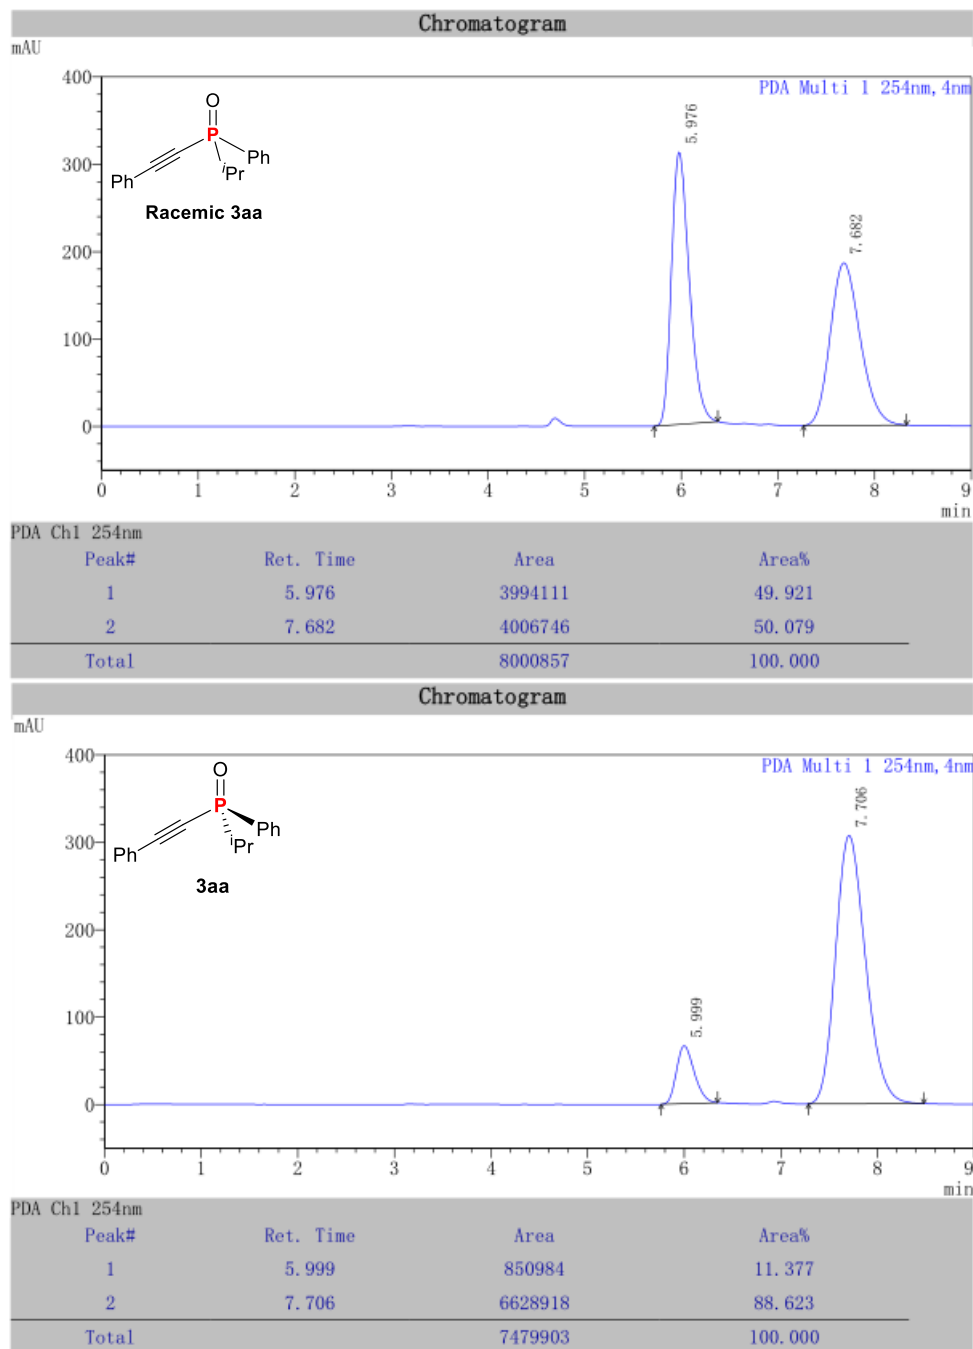



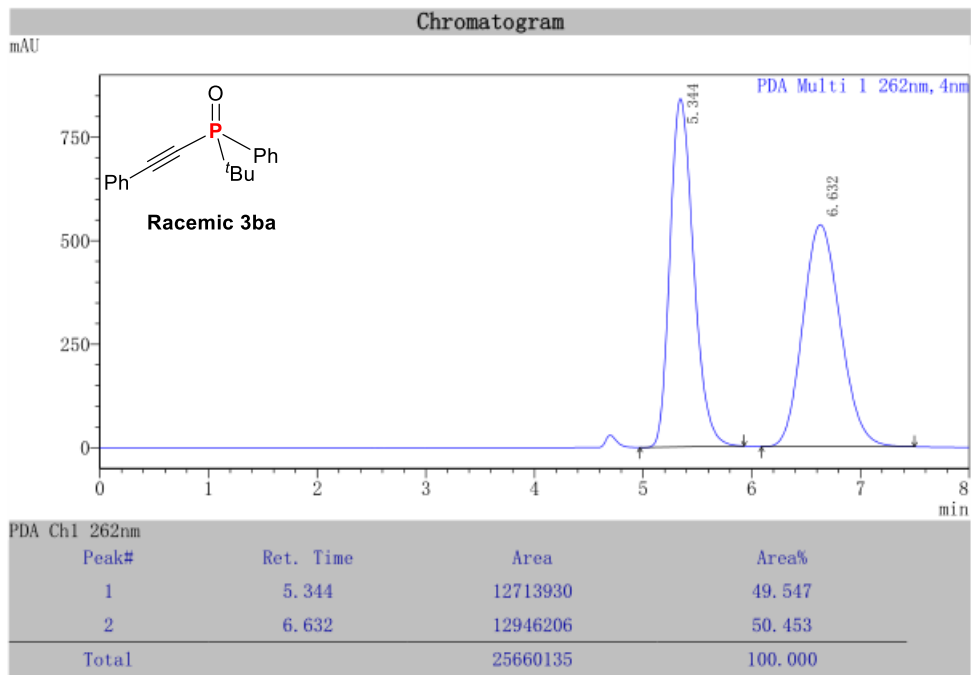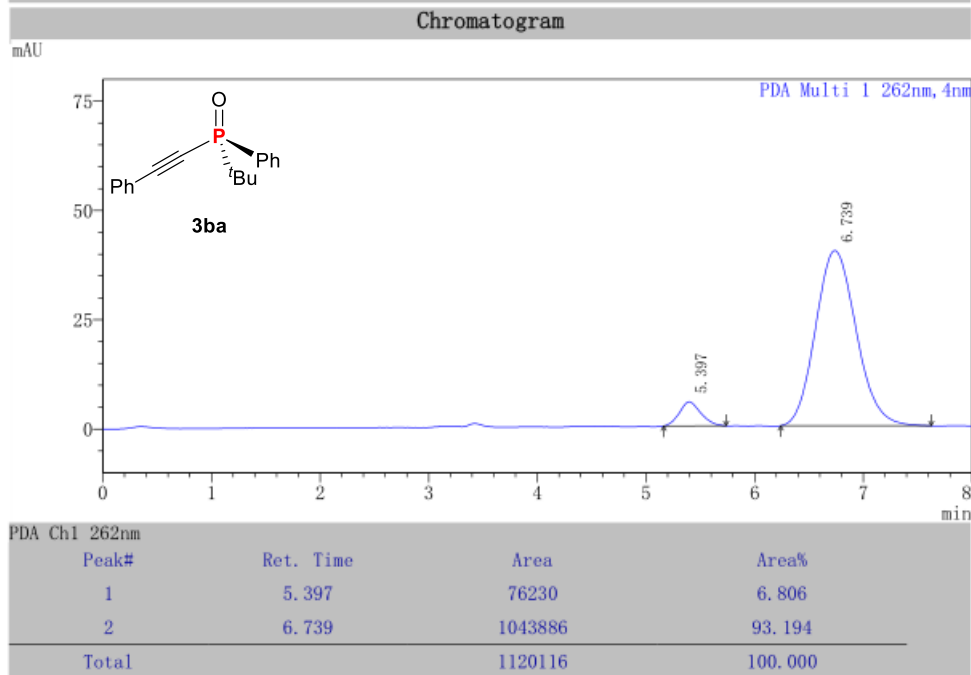

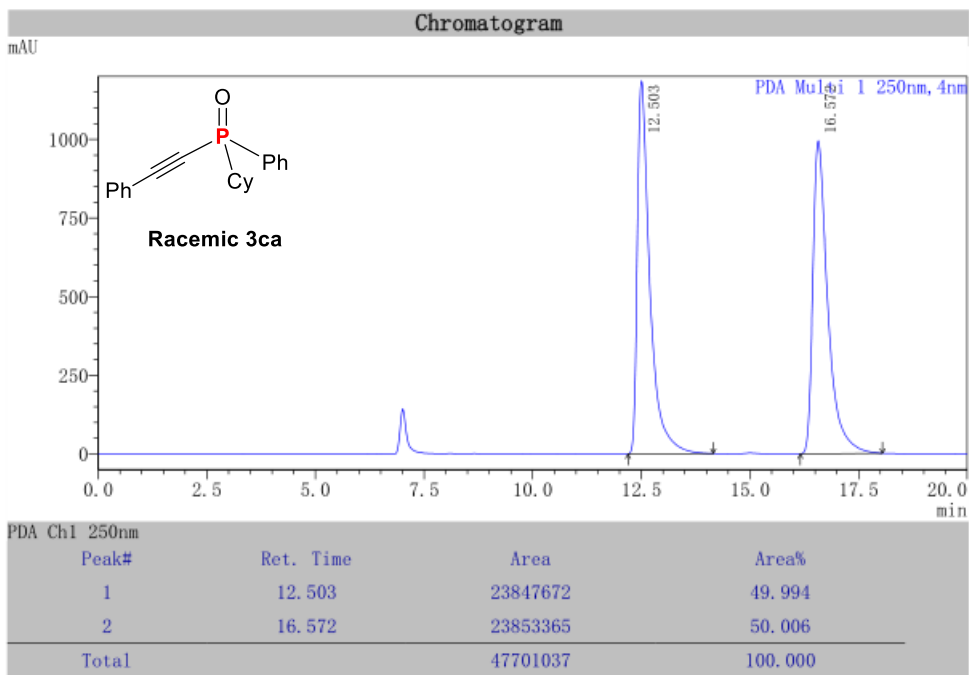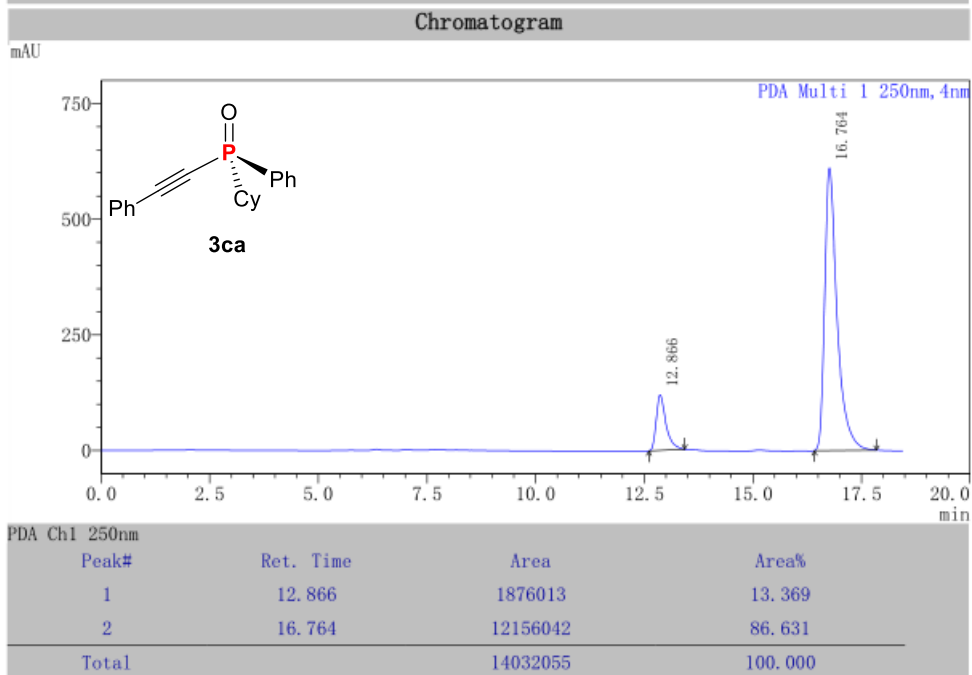

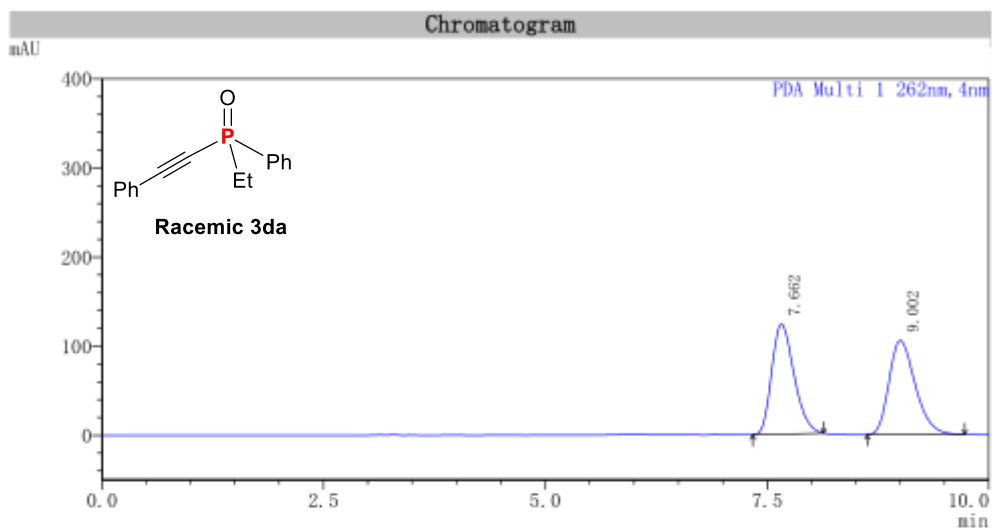

| Peak#        | Ret. Time | Area           | Area%          |
|--------------|-----------|----------------|----------------|
| 1            | 7.662     | 2171944        | 49.923         |
| 2            | 9.002     | 2178618        | 50.077         |
| <b>Total</b> |           | <b>4350562</b> | <b>100.000</b> |

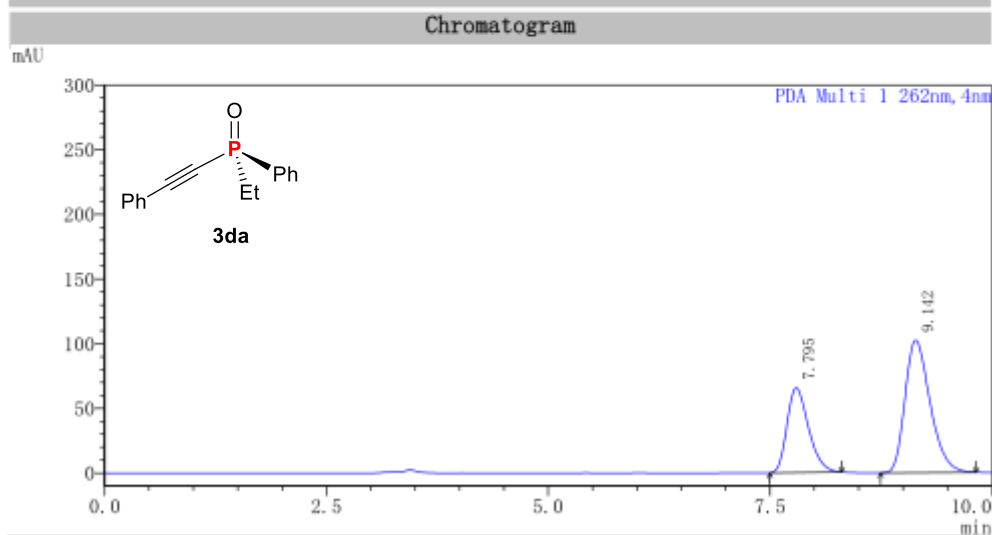

| Peak#        | Ret. Time | Area           | Area%          |
|--------------|-----------|----------------|----------------|
| 1            | 7.795     | 1109470        | 35.437         |
| 2            | 9.142     | 2021352        | 64.563         |
| <b>Total</b> |           | <b>3130822</b> | <b>100.000</b> |

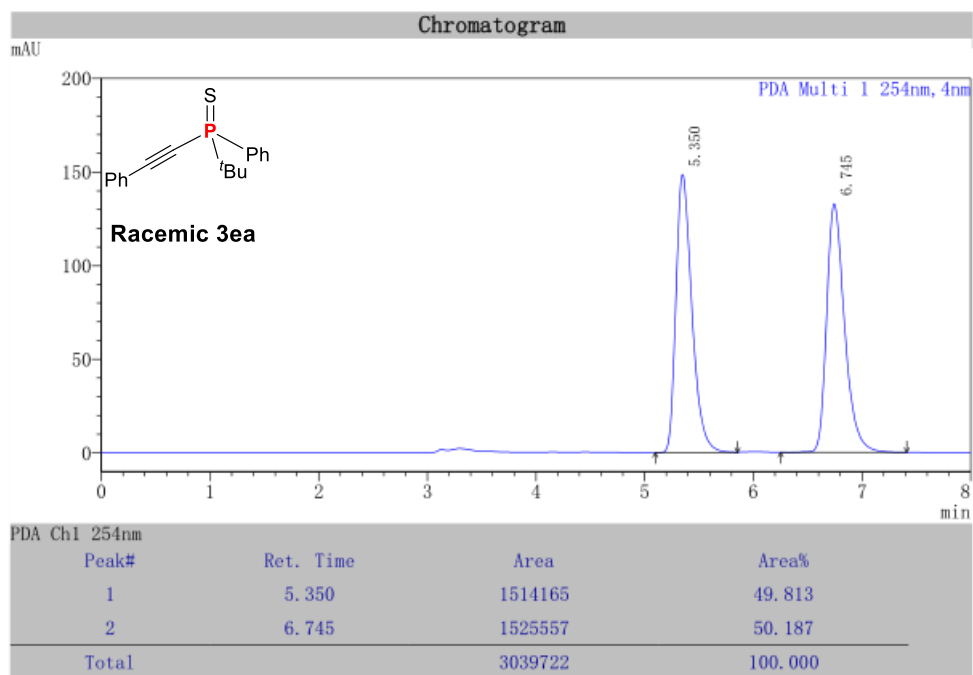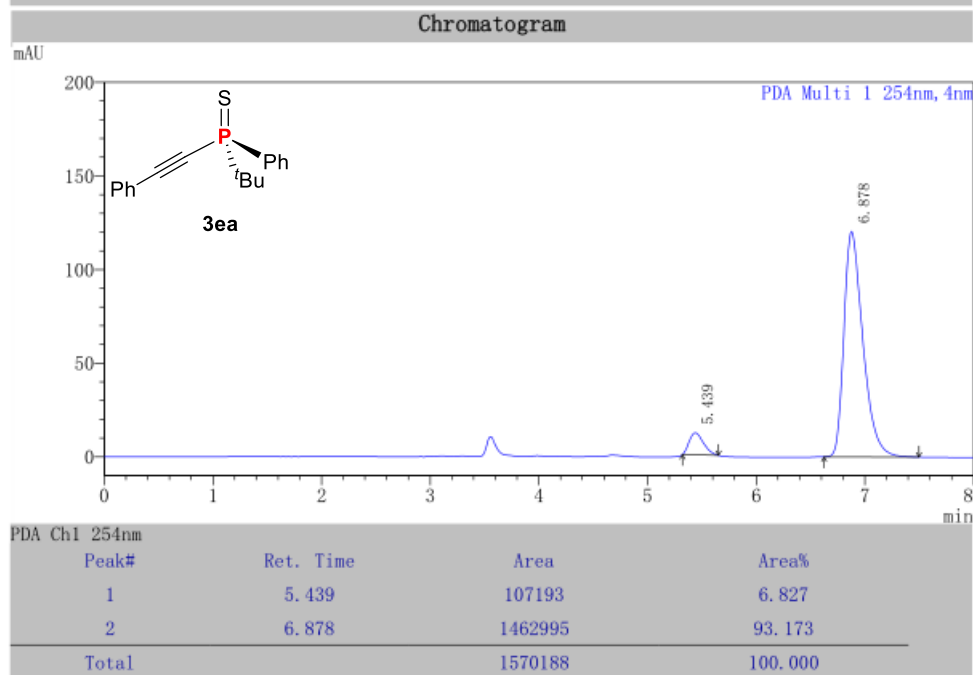

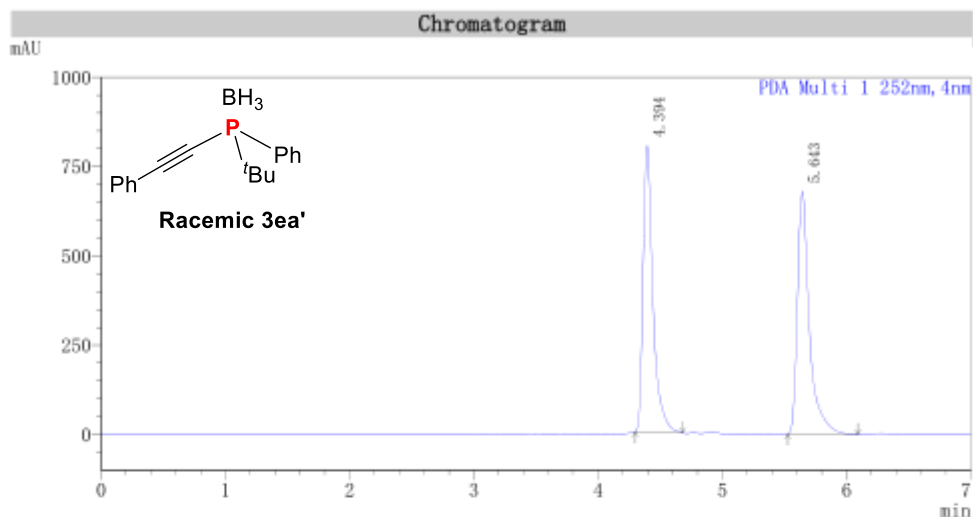

| Peak#        | Ret. Time | Area           | Area%          |
|--------------|-----------|----------------|----------------|
| 1            | 4.394     | 4450554        | 49.424         |
| 2            | 5.643     | 4554299        | 50.576         |
| <b>Total</b> |           | <b>9004853</b> | <b>100.000</b> |

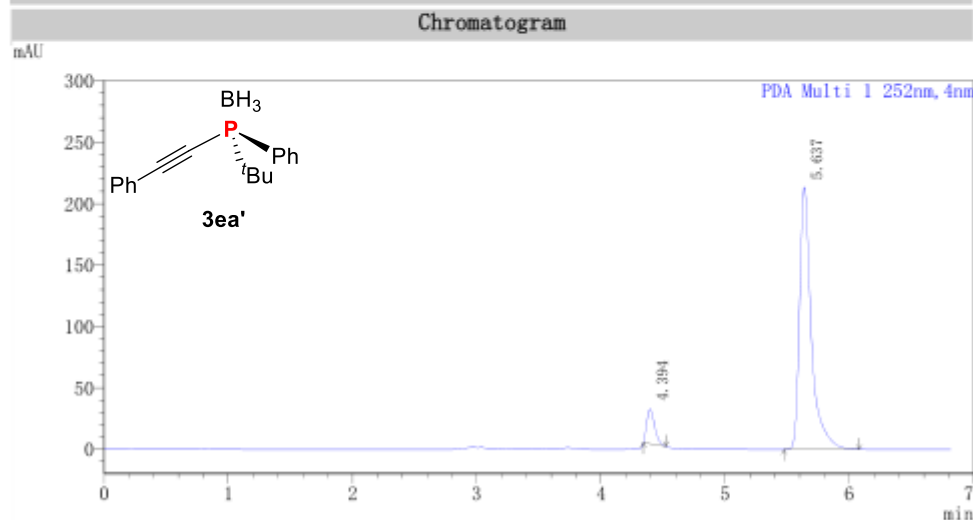

| Peak#        | Ret. Time | Area           | Area%          |
|--------------|-----------|----------------|----------------|
| 1            | 4.394     | 124076         | 8.062          |
| 2            | 5.637     | 1415008        | 91.938         |
| <b>Total</b> |           | <b>1539084</b> | <b>100.000</b> |

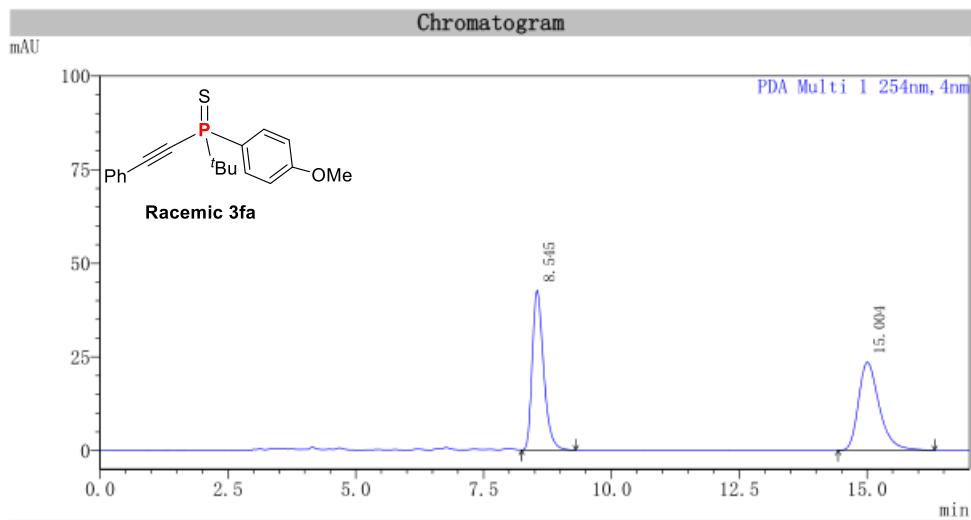

PDA Ch1 254nm

| Peak#        | Ret. Time | Area           | Area%          |
|--------------|-----------|----------------|----------------|
| 1            | 8.545     | 662691         | 49.904         |
| 2            | 15.004    | 665247         | 50.096         |
| <b>Total</b> |           | <b>1327937</b> | <b>100.000</b> |

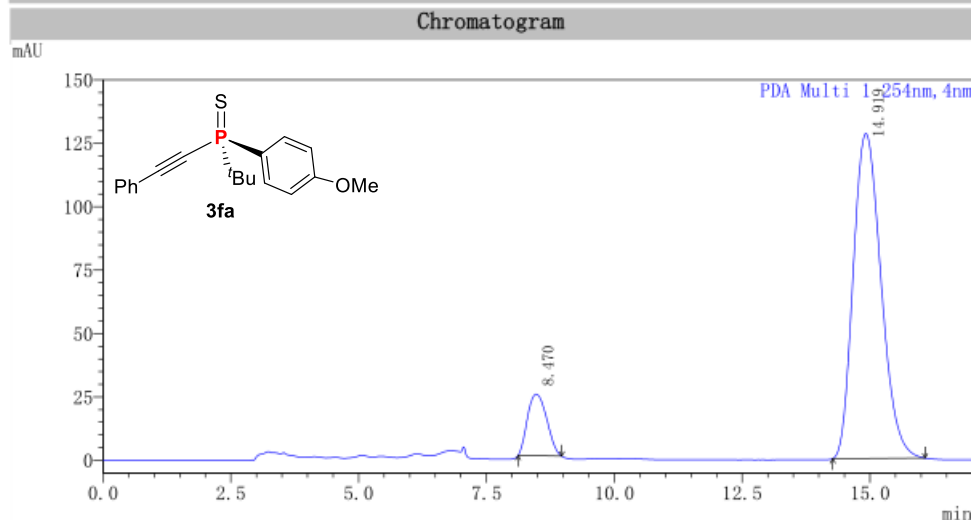

PDA Ch1 254nm

| Peak#        | Ret. Time | Area           | Area%          |
|--------------|-----------|----------------|----------------|
| 1            | 8.470     | 636598         | 11.604         |
| 2            | 14.919    | 4849454        | 88.396         |
| <b>Total</b> |           | <b>5486052</b> | <b>100.000</b> |

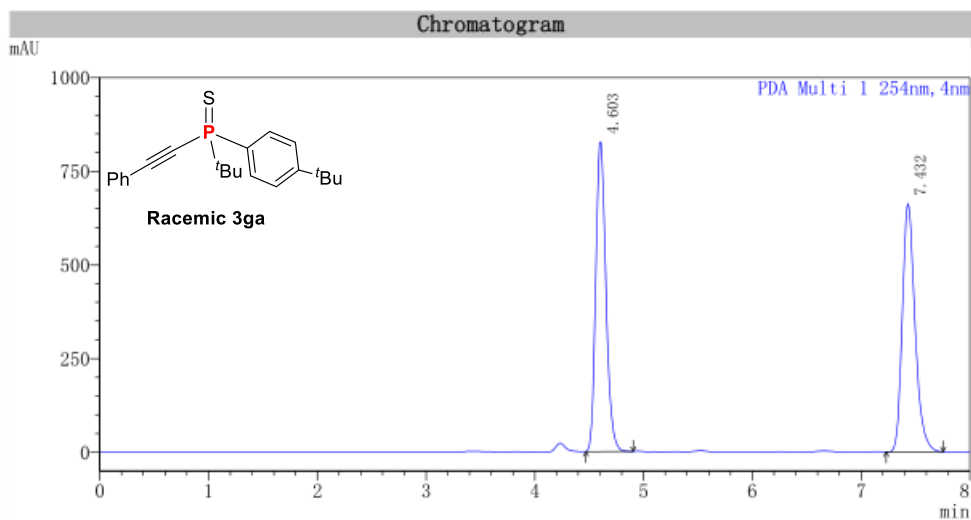

| Peak#        | Ret. Time | Area            | Area%          |
|--------------|-----------|-----------------|----------------|
| 1            | 4.603     | 5375367         | 49.893         |
| 2            | 7.432     | 5398402         | 50.107         |
| <b>Total</b> |           | <b>10773769</b> | <b>100.000</b> |

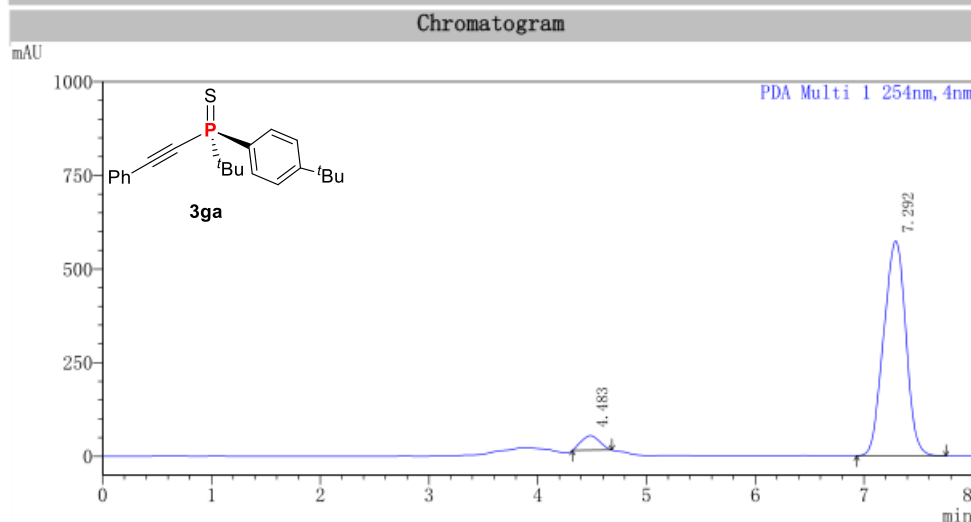

| Peak#        | Ret. Time | Area           | Area%          |
|--------------|-----------|----------------|----------------|
| 1            | 4.483     | 456239         | 5.303          |
| 2            | 7.292     | 8147739        | 94.697         |
| <b>Total</b> |           | <b>8603978</b> | <b>100.000</b> |

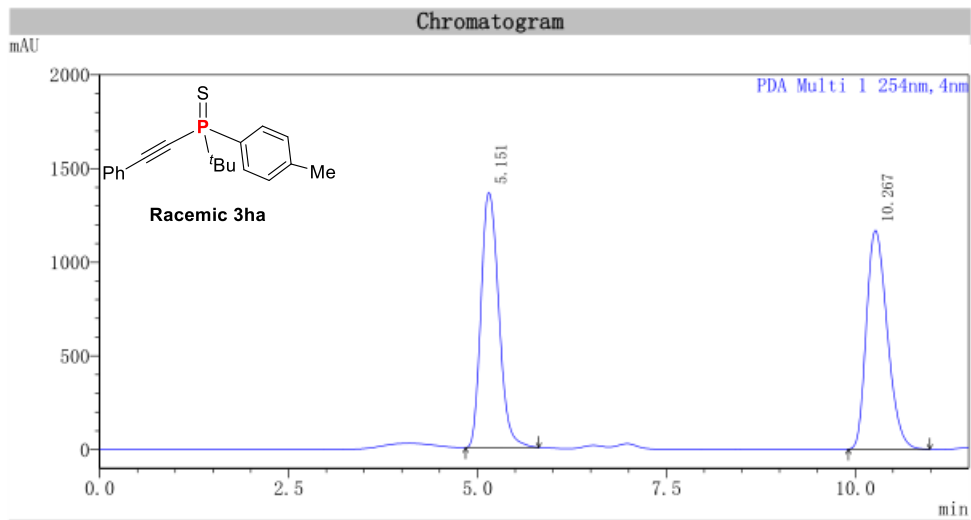

| Peak#        | Ret. Time | Area            | Area%          |
|--------------|-----------|-----------------|----------------|
| 1            | 5.151     | 22293660        | 49.796         |
| 2            | 10.267    | 22476466        | 50.204         |
| <b>Total</b> |           | <b>44770126</b> | <b>100.000</b> |

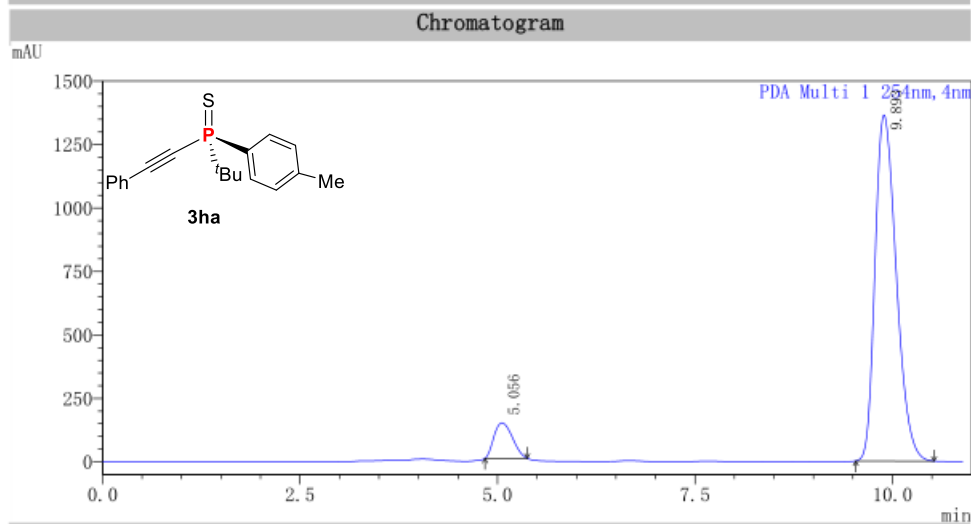

| Peak#        | Ret. Time | Area            | Area%          |
|--------------|-----------|-----------------|----------------|
| 1            | 5.056     | 2260201         | 8.175          |
| 2            | 9.893     | 25388648        | 91.825         |
| <b>Total</b> |           | <b>27648850</b> | <b>100.000</b> |



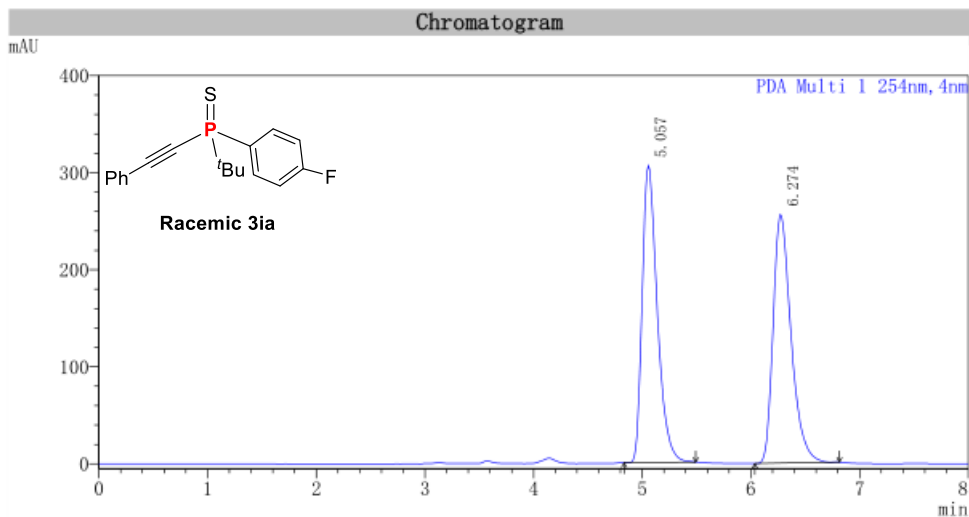

| Peak#        | Ret. Time | Area           | Area%          |
|--------------|-----------|----------------|----------------|
| 1            | 5.057     | 2946747        | 50.002         |
| 2            | 6.274     | 2946523        | 49.998         |
| <b>Total</b> |           | <b>5893271</b> | <b>100.000</b> |

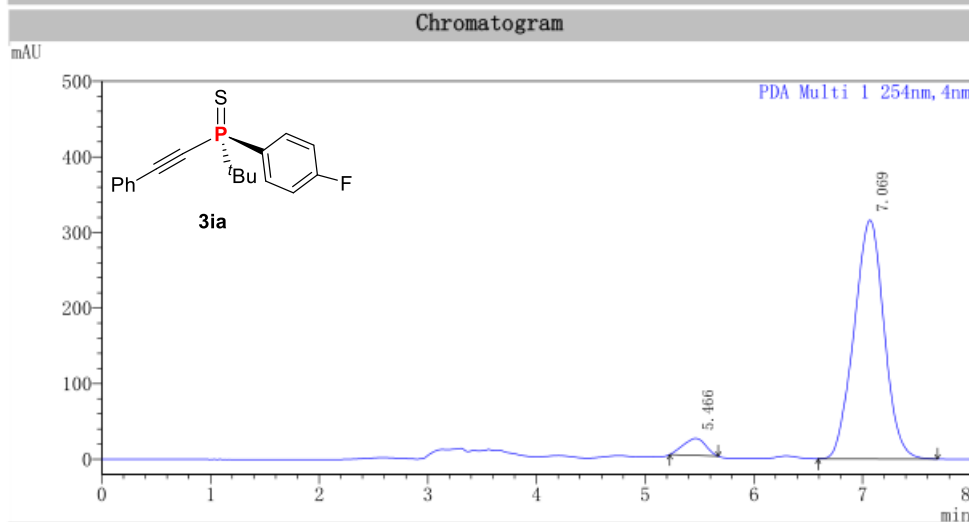

| Peak#        | Ret. Time | Area           | Area%          |
|--------------|-----------|----------------|----------------|
| 1            | 5.466     | 323529         | 5.046          |
| 2            | 7.069     | 6087791        | 94.954         |
| <b>Total</b> |           | <b>6411319</b> | <b>100.000</b> |

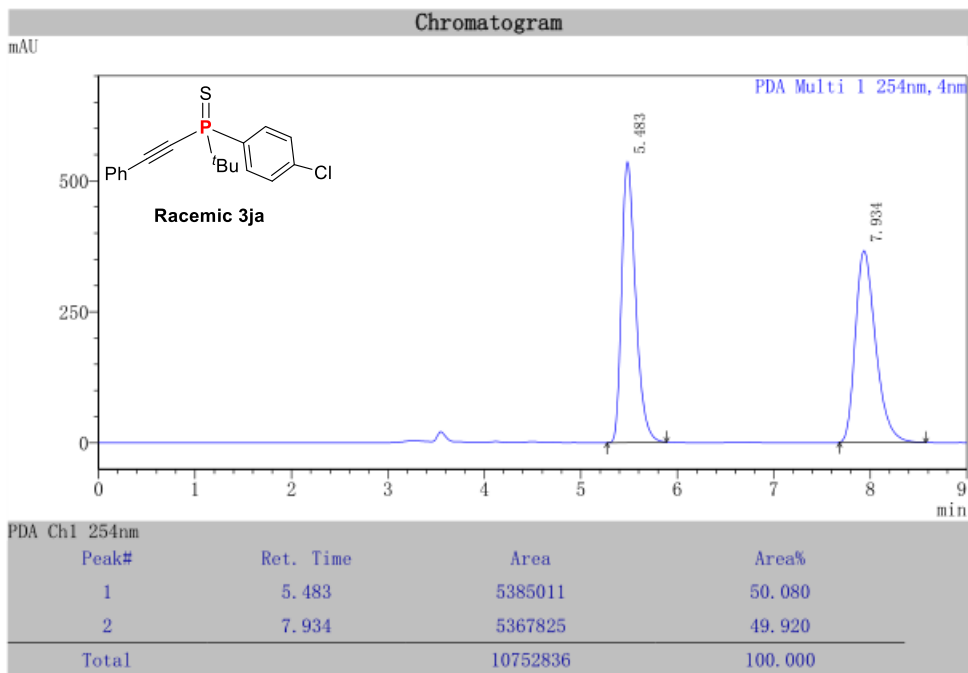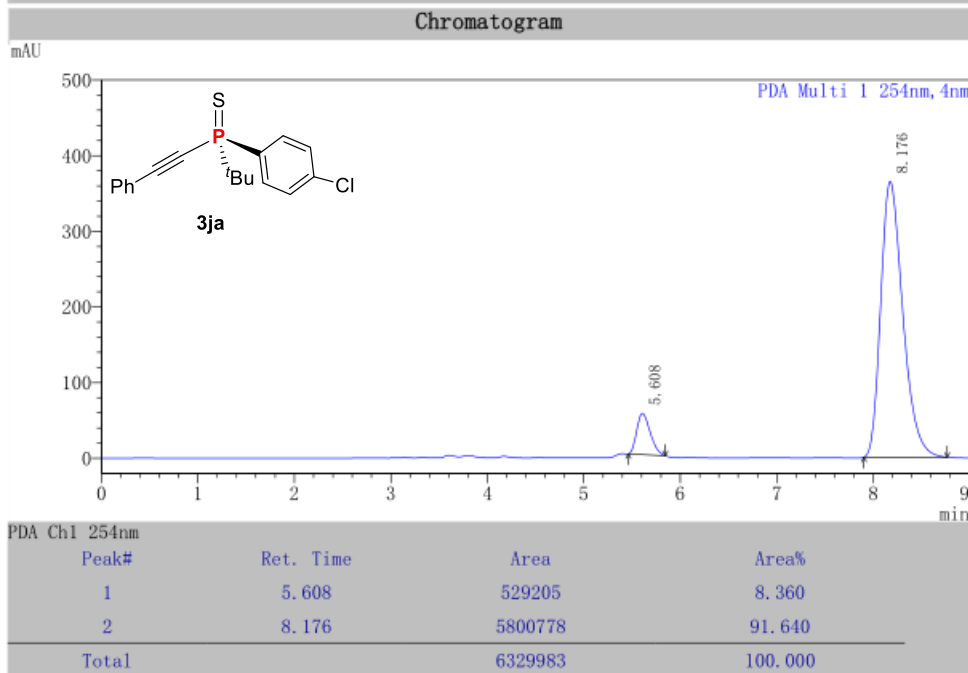

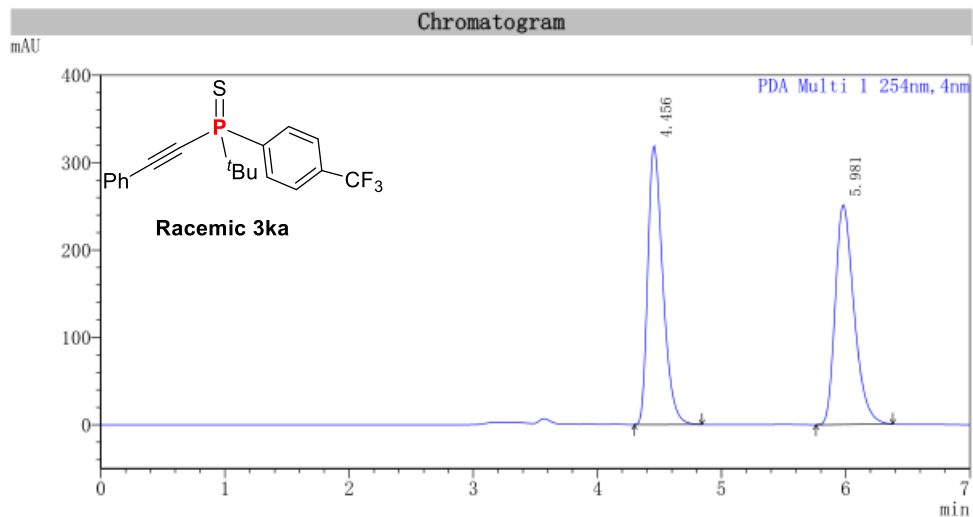

| Peak#        | Ret. Time | Area           | Area%          |
|--------------|-----------|----------------|----------------|
| 1            | 4.456     | 2686211        | 50.262         |
| 2            | 5.981     | 2658176        | 49.738         |
| <b>Total</b> |           | <b>5344387</b> | <b>100.000</b> |

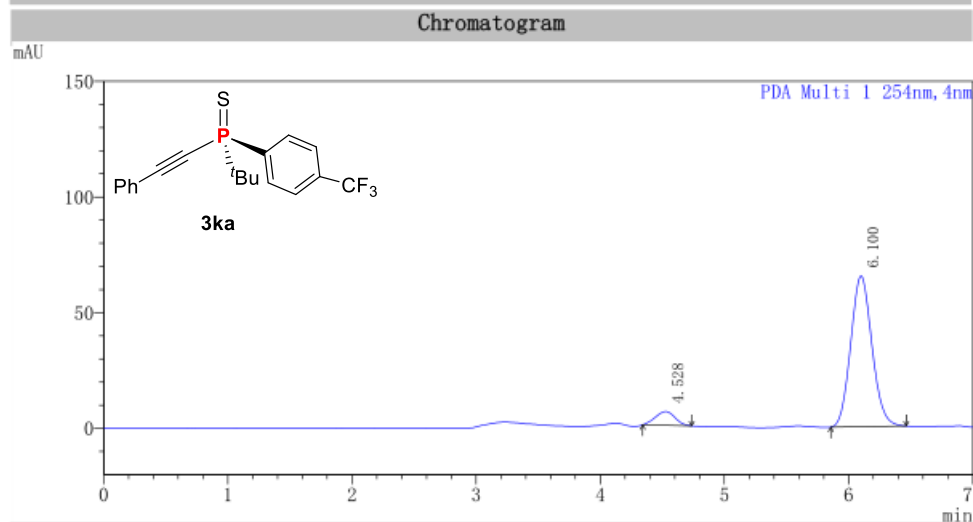

| Peak#        | Ret. Time | Area          | Area%          |
|--------------|-----------|---------------|----------------|
| 1            | 4.528     | 65497         | 7.772          |
| 2            | 6.100     | 777252        | 92.228         |
| <b>Total</b> |           | <b>842749</b> | <b>100.000</b> |

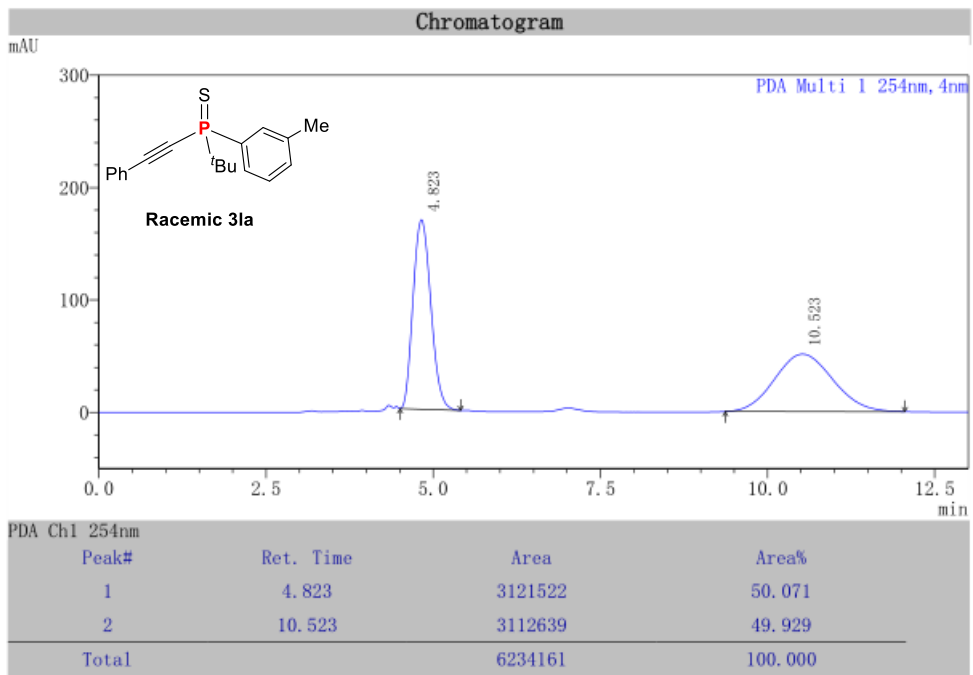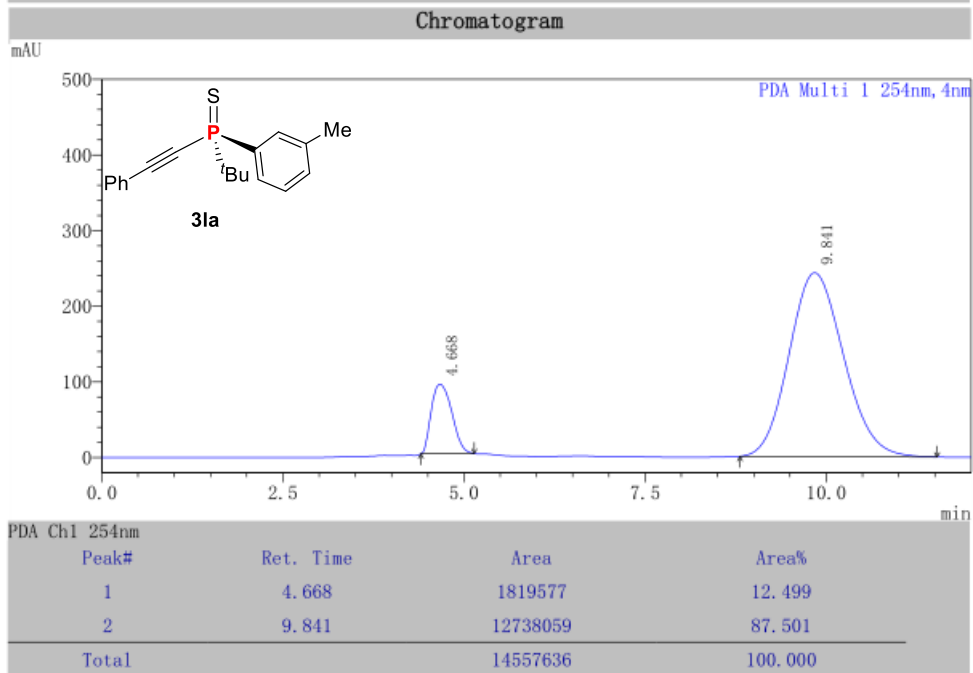

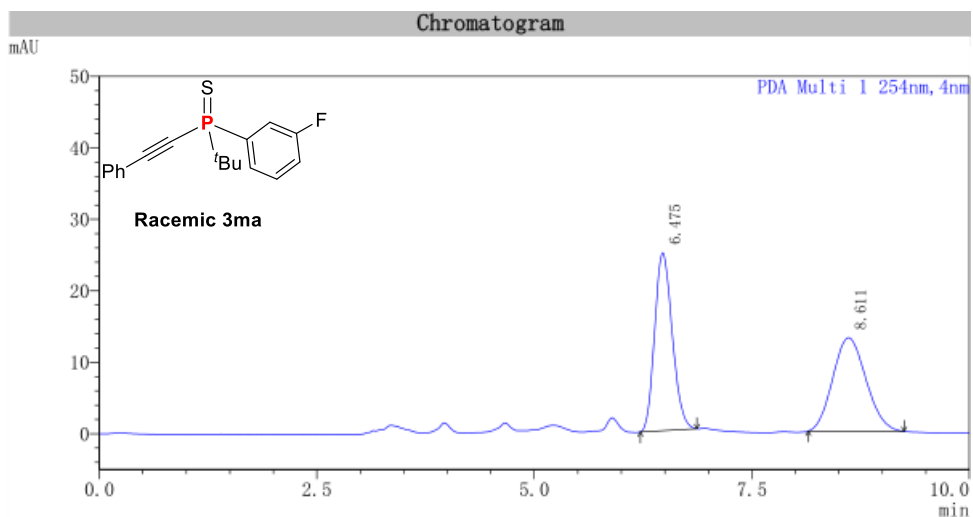

| Peak#        | Ret. Time | Area          | Area%          |
|--------------|-----------|---------------|----------------|
| 1            | 6.475     | 350293        | 50.163         |
| 2            | 8.611     | 348016        | 49.837         |
| <b>Total</b> |           | <b>698309</b> | <b>100.000</b> |

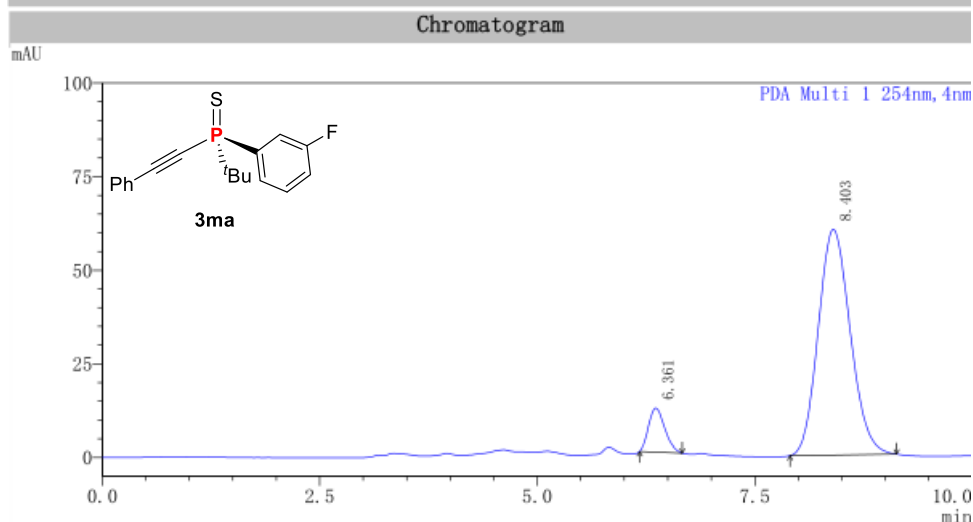

| Peak#        | Ret. Time | Area           | Area%          |
|--------------|-----------|----------------|----------------|
| 1            | 6.361     | 153561         | 9.033          |
| 2            | 8.403     | 1546341        | 90.967         |
| <b>Total</b> |           | <b>1699902</b> | <b>100.000</b> |

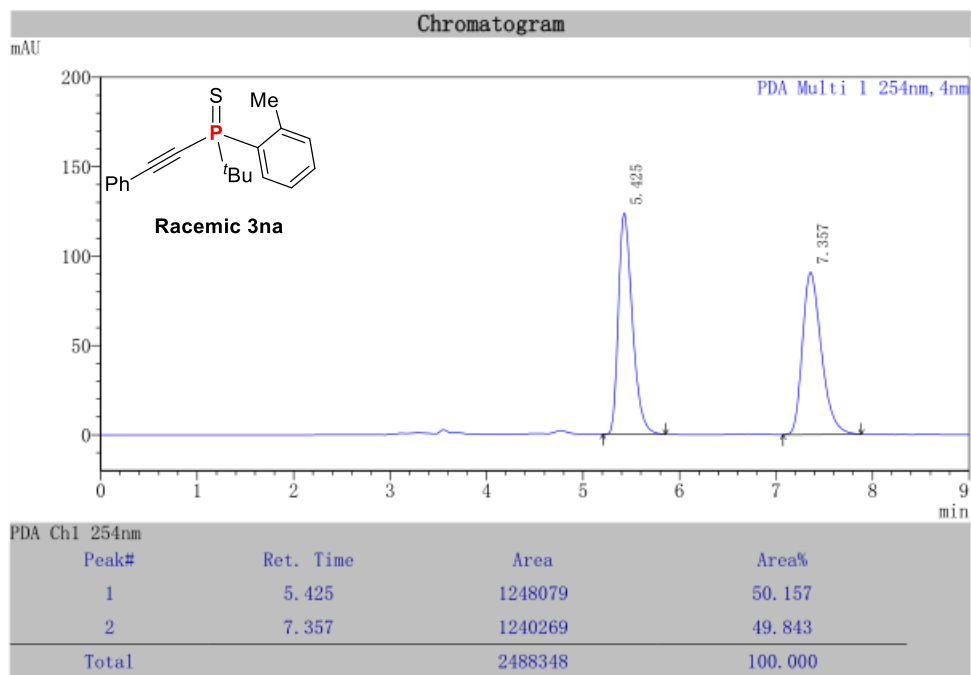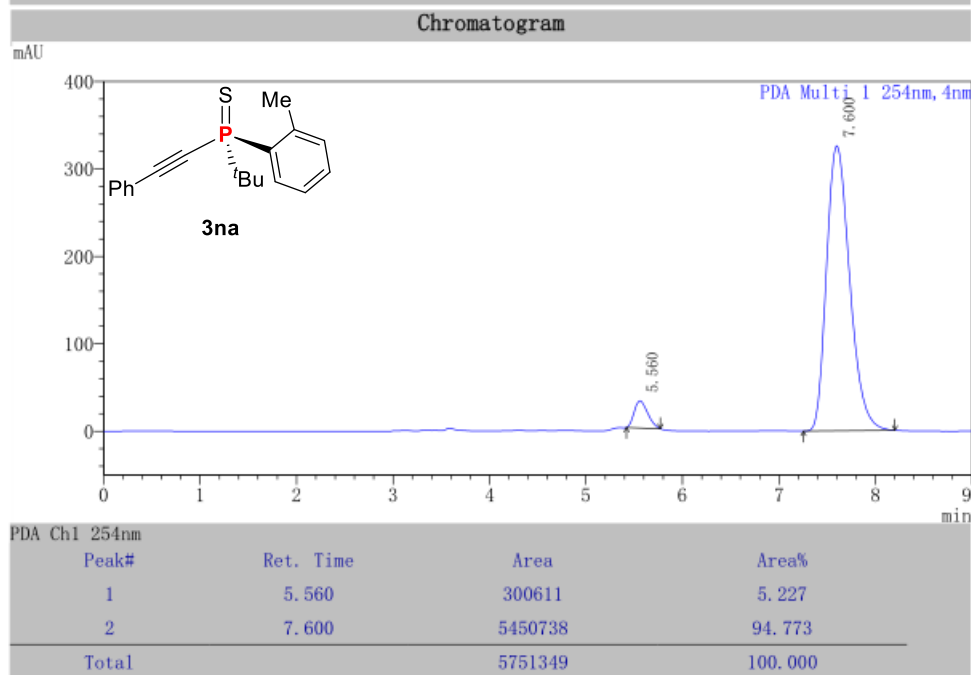

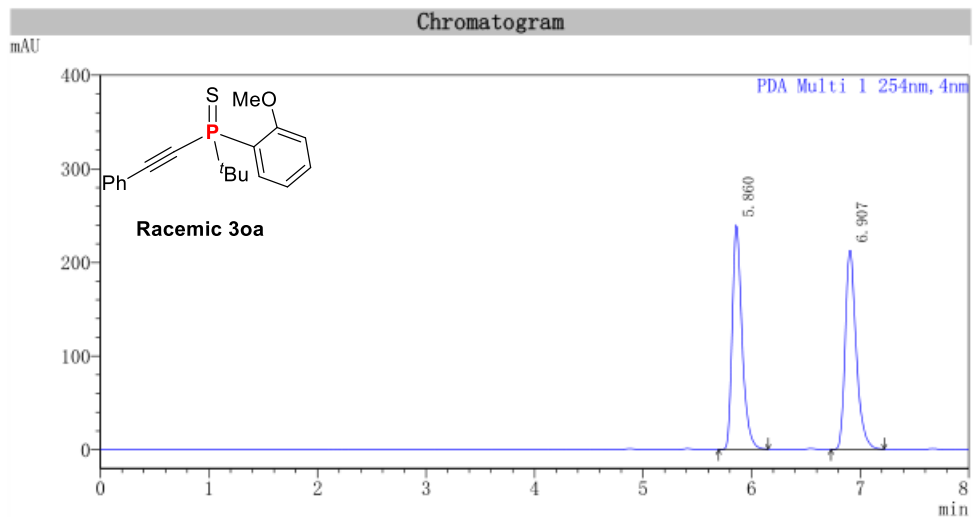

| Peak#        | Ret. Time | Area           | Area%          |
|--------------|-----------|----------------|----------------|
| 1            | 5.860     | 1503345        | 49.960         |
| 2            | 6.907     | 1505781        | 50.040         |
| <b>Total</b> |           | <b>3009126</b> | <b>100.000</b> |

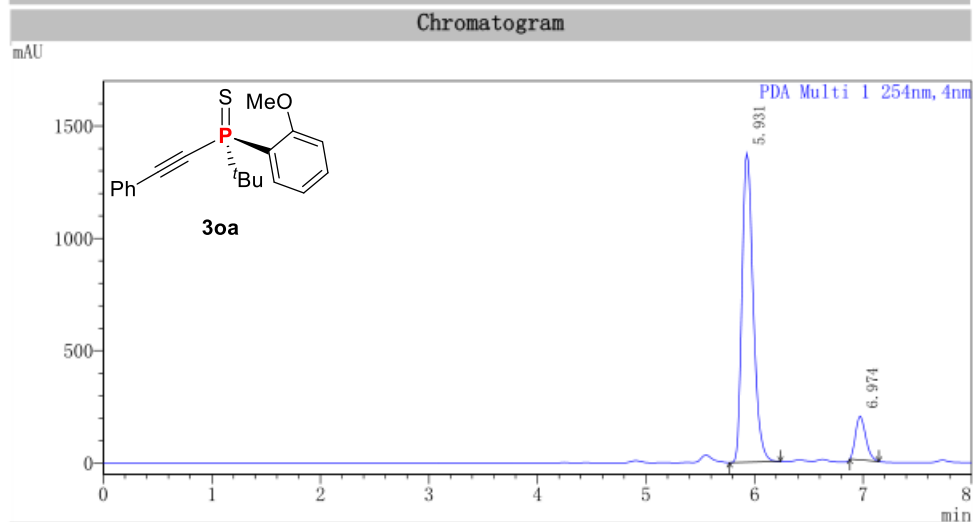

| Peak#        | Ret. Time | Area            | Area%          |
|--------------|-----------|-----------------|----------------|
| 1            | 5.931     | 9856850         | 88.629         |
| 2            | 6.974     | 1264563         | 11.371         |
| <b>Total</b> |           | <b>11121414</b> | <b>100.000</b> |

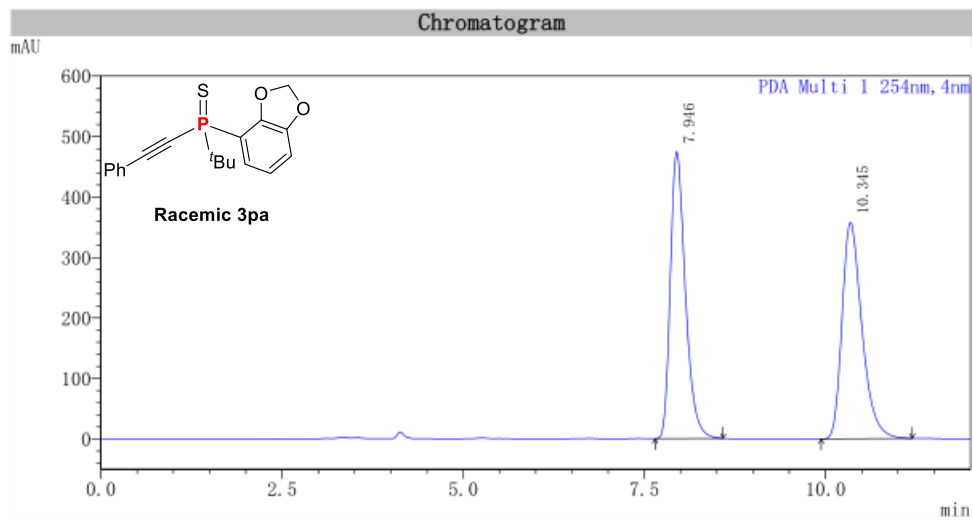

| Peak#        | Ret. Time | Area            | Area%          |
|--------------|-----------|-----------------|----------------|
| 1            | 7.946     | 6847136         | 50.022         |
| 2            | 10.345    | 6841125         | 49.978         |
| <b>Total</b> |           | <b>13688261</b> | <b>100.000</b> |

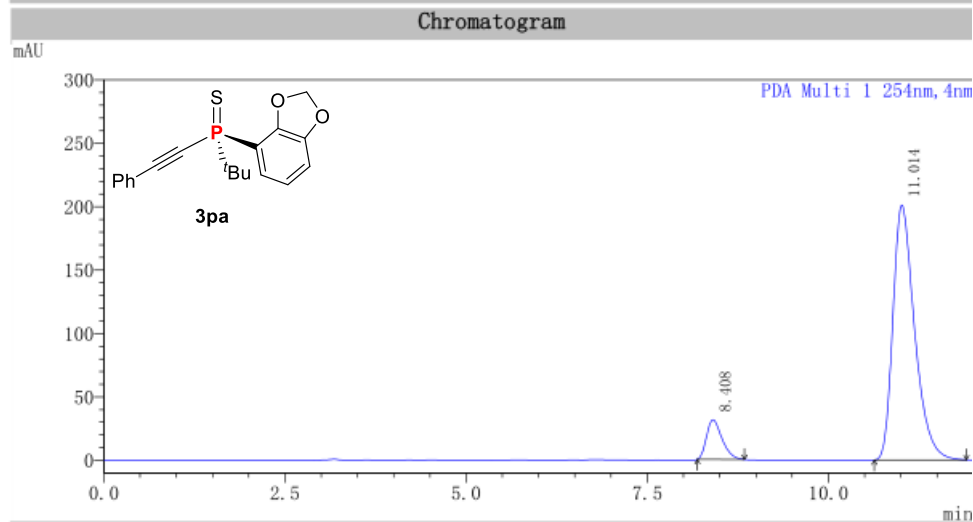

| Peak#        | Ret. Time | Area           | Area%          |
|--------------|-----------|----------------|----------------|
| 1            | 5.439     | 107193         | 6.827          |
| 2            | 6.878     | 1462995        | 93.173         |
| <b>Total</b> |           | <b>1570188</b> | <b>100.000</b> |



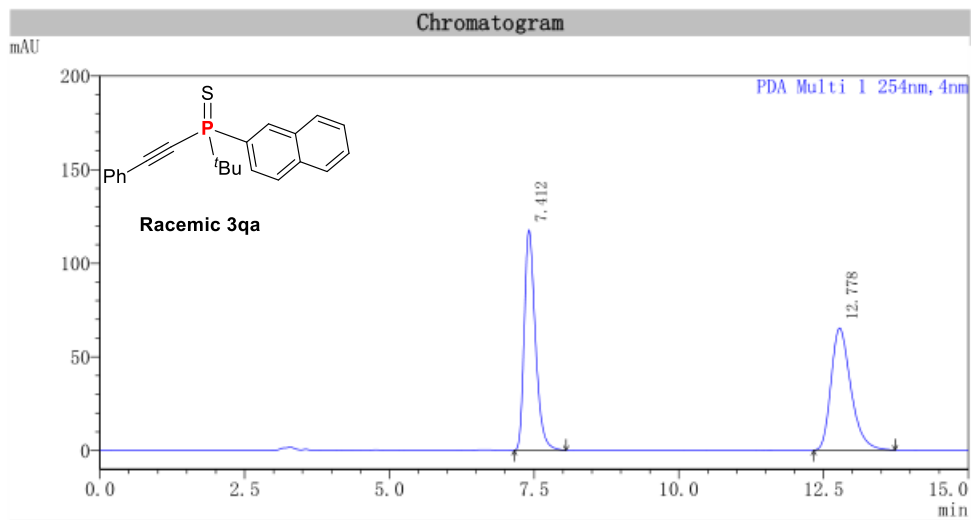

| Peak#        | Ret. Time | Area           | Area%          |
|--------------|-----------|----------------|----------------|
| 1            | 7.412     | 1574867        | 50.276         |
| 2            | 12.778    | 1557579        | 49.724         |
| <b>Total</b> |           | <b>3132446</b> | <b>100.000</b> |

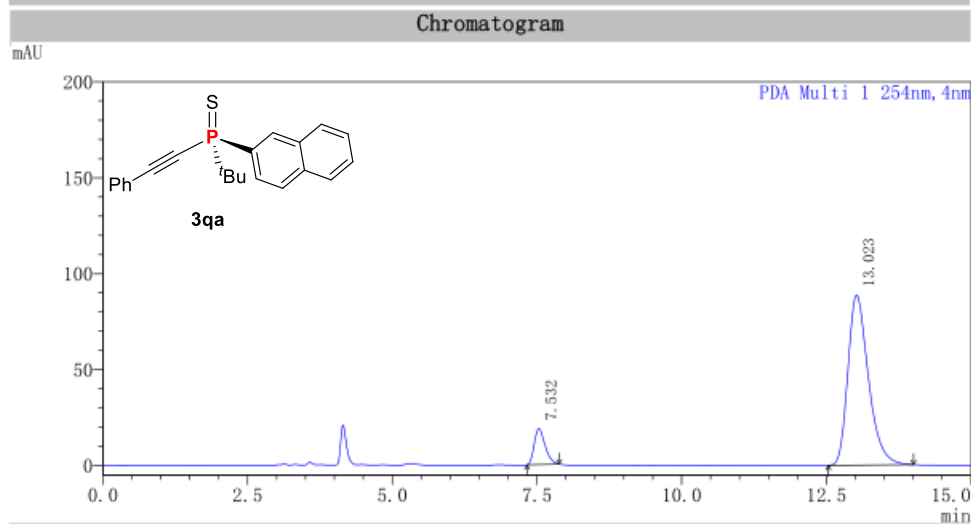

| Peak#        | Ret. Time | Area           | Area%          |
|--------------|-----------|----------------|----------------|
| 1            | 7.532     | 245616         | 10.098         |
| 2            | 13.023    | 2186775        | 89.902         |
| <b>Total</b> |           | <b>2432391</b> | <b>100.000</b> |

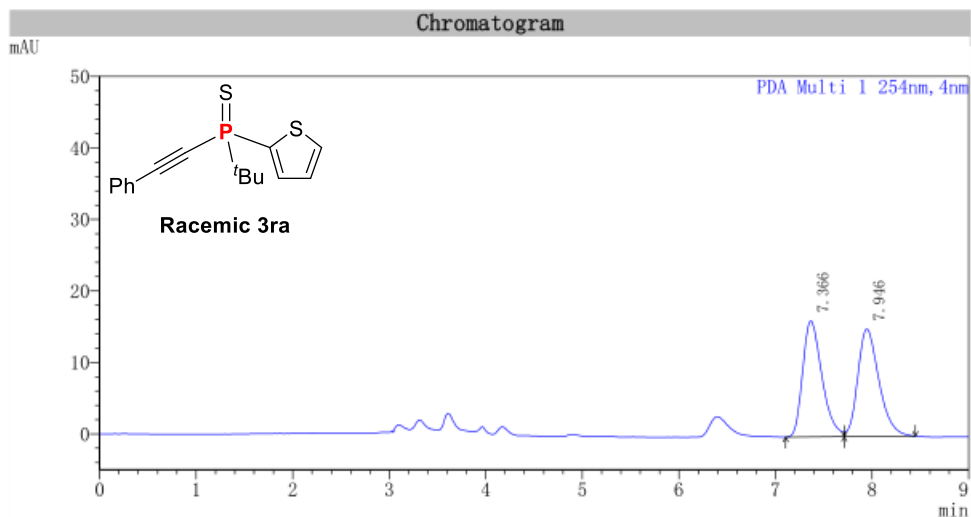

| Peak#        | Ret. Time | Area          | Area%          |
|--------------|-----------|---------------|----------------|
| 1            | 7.366     | 225586        | 49.593         |
| 2            | 7.946     | 229293        | 50.407         |
| <b>Total</b> |           | <b>454879</b> | <b>100.000</b> |

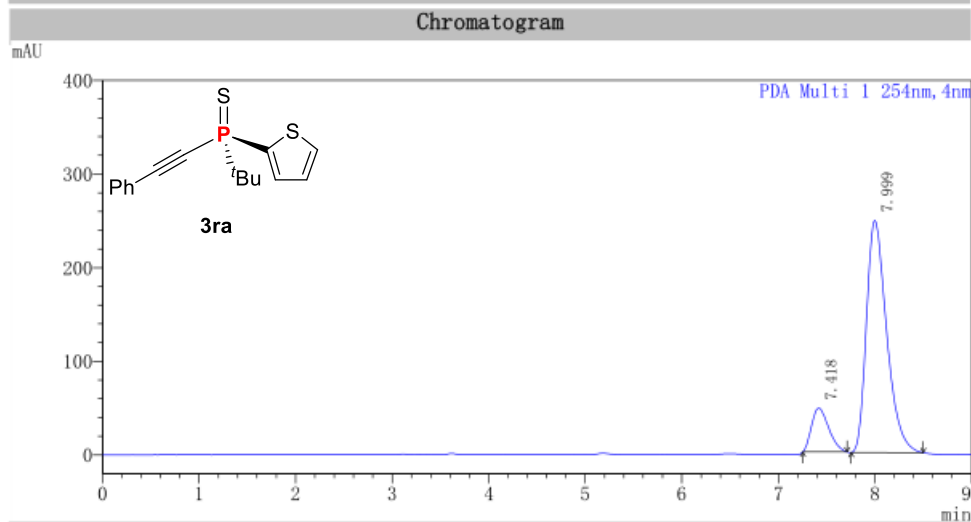

| Peak#        | Ret. Time | Area           | Area%          |
|--------------|-----------|----------------|----------------|
| 1            | 7.418     | 580494         | 13.845         |
| 2            | 7.999     | 3612422        | 86.155         |
| <b>Total</b> |           | <b>4192916</b> | <b>100.000</b> |

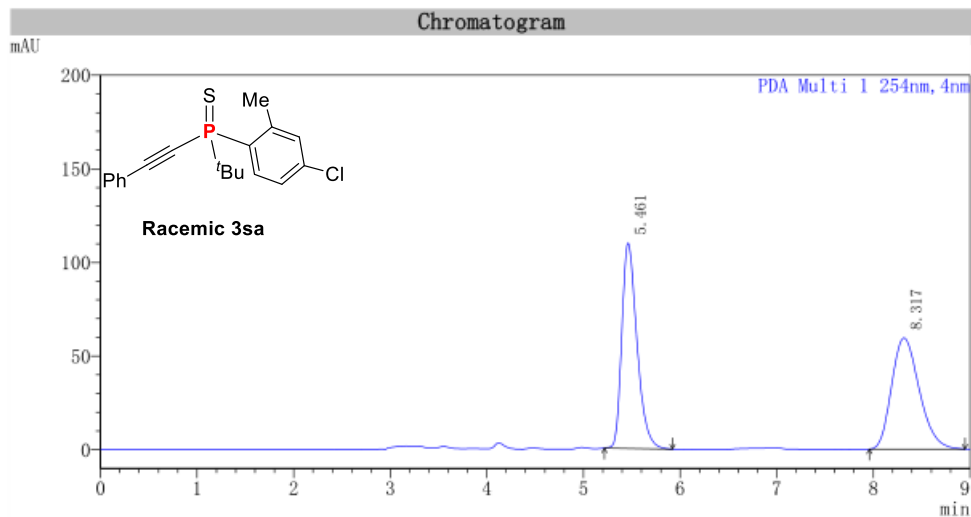

| Peak#        | Ret. Time | Area           | Area%          |
|--------------|-----------|----------------|----------------|
| 1            | 5.461     | 1196940        | 50.255         |
| 2            | 8.317     | 1184809        | 49.745         |
| <b>Total</b> |           | <b>2381750</b> | <b>100.000</b> |

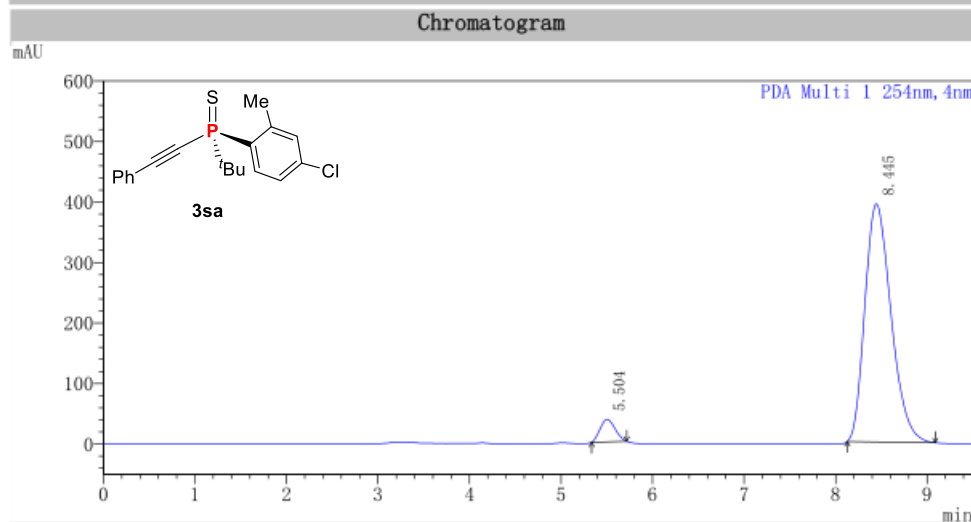

| Peak#        | Ret. Time | Area           | Area%          |
|--------------|-----------|----------------|----------------|
| 1            | 5.504     | 420344         | 5.094          |
| 2            | 8.445     | 7831845        | 94.906         |
| <b>Total</b> |           | <b>8252189</b> | <b>100.000</b> |

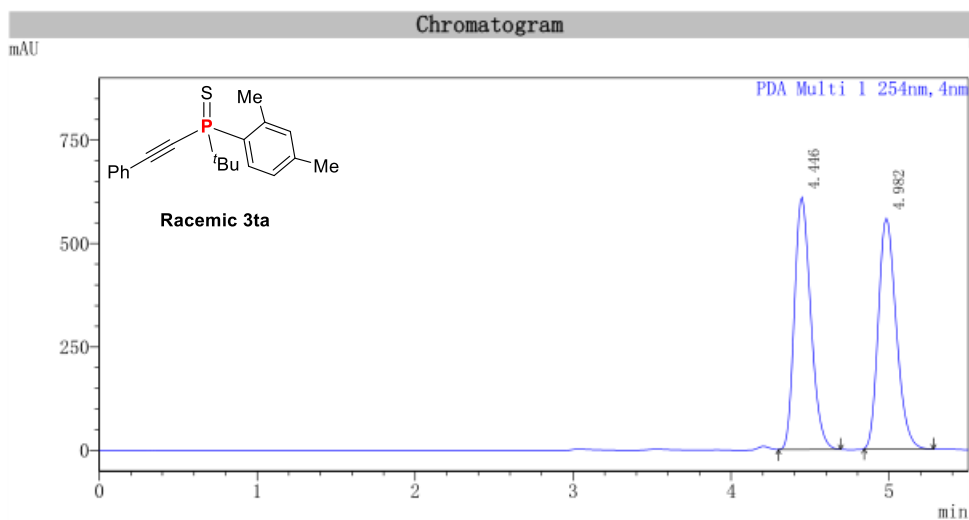

PDA ChI 254nm

| Peak#        | Ret. Time | Area           | Area%          |
|--------------|-----------|----------------|----------------|
| 1            | 4.446     | 4397573        | 50.272         |
| 2            | 4.982     | 4349959        | 49.728         |
| <b>Total</b> |           | <b>8747532</b> | <b>100.000</b> |

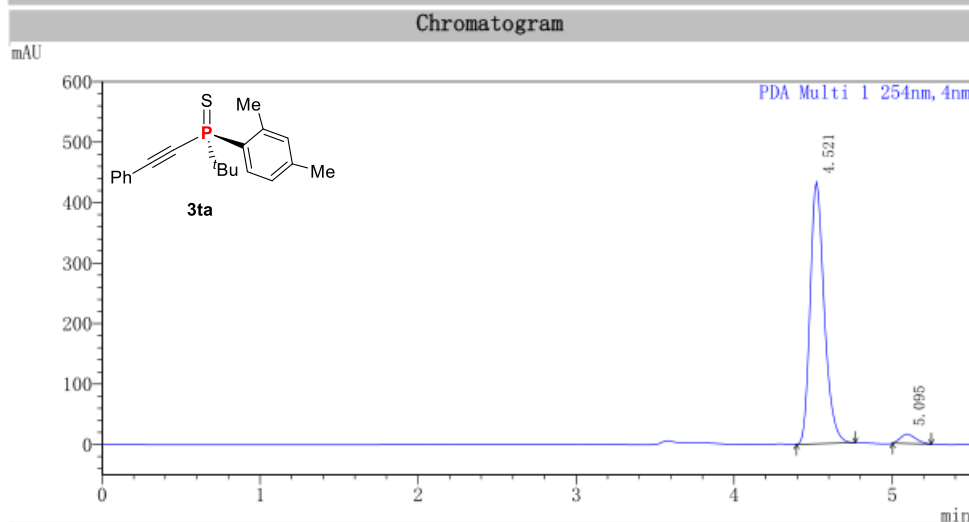

PDA ChI 254nm

| Peak#        | Ret. Time | Area           | Area%          |
|--------------|-----------|----------------|----------------|
| 1            | 4.521     | 2691931        | 96.315         |
| 2            | 5.095     | 102979         | 3.685          |
| <b>Total</b> |           | <b>2794909</b> | <b>100.000</b> |

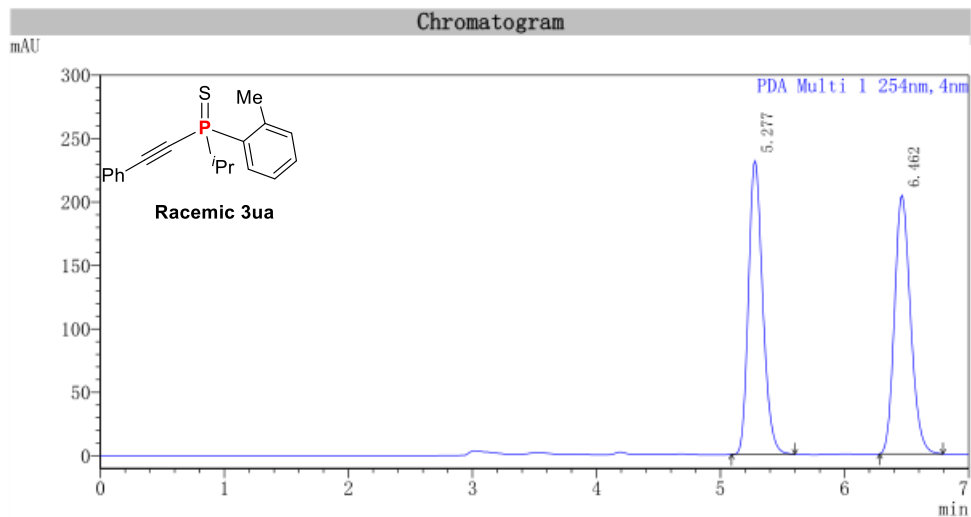

| Peak#        | Ret. Time | Area           | Area%          |
|--------------|-----------|----------------|----------------|
| 1            | 5.277     | 1839717        | 50.045         |
| 2            | 6.462     | 1836377        | 49.955         |
| <b>Total</b> |           | <b>3676095</b> | <b>100.000</b> |

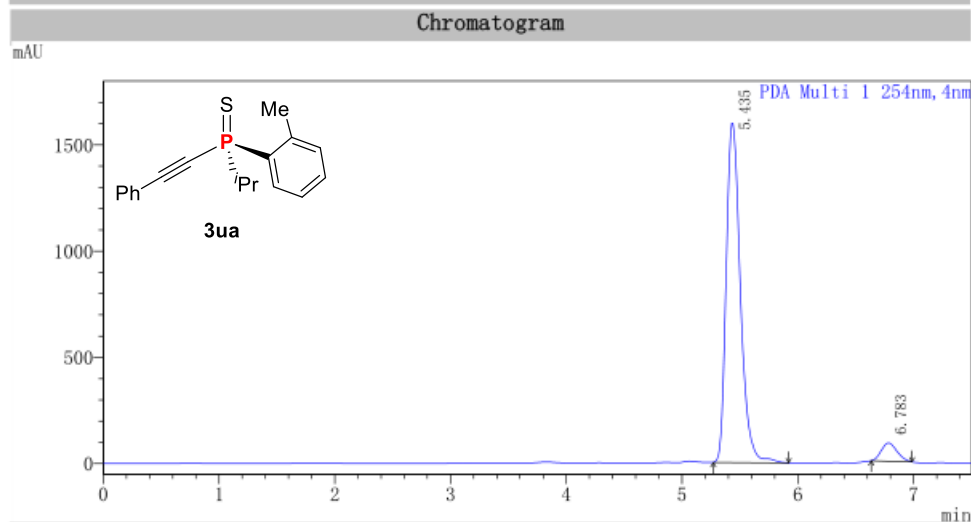

| Peak#        | Ret. Time | Area            | Area%          |
|--------------|-----------|-----------------|----------------|
| 1            | 5.435     | 13559353        | 94.379         |
| 2            | 6.783     | 807545          | 5.621          |
| <b>Total</b> |           | <b>14366898</b> | <b>100.000</b> |

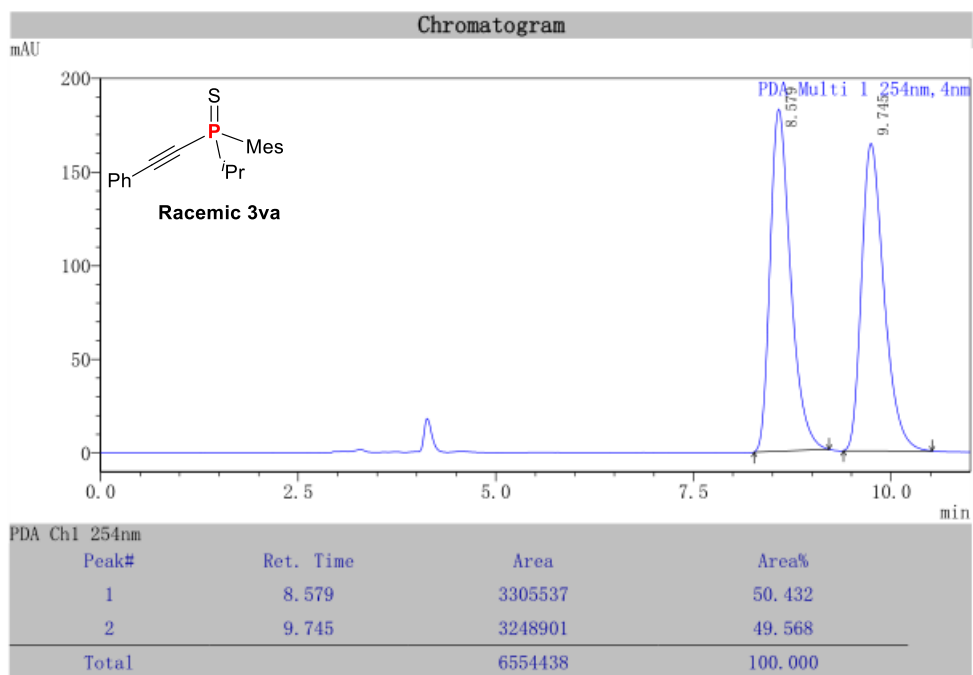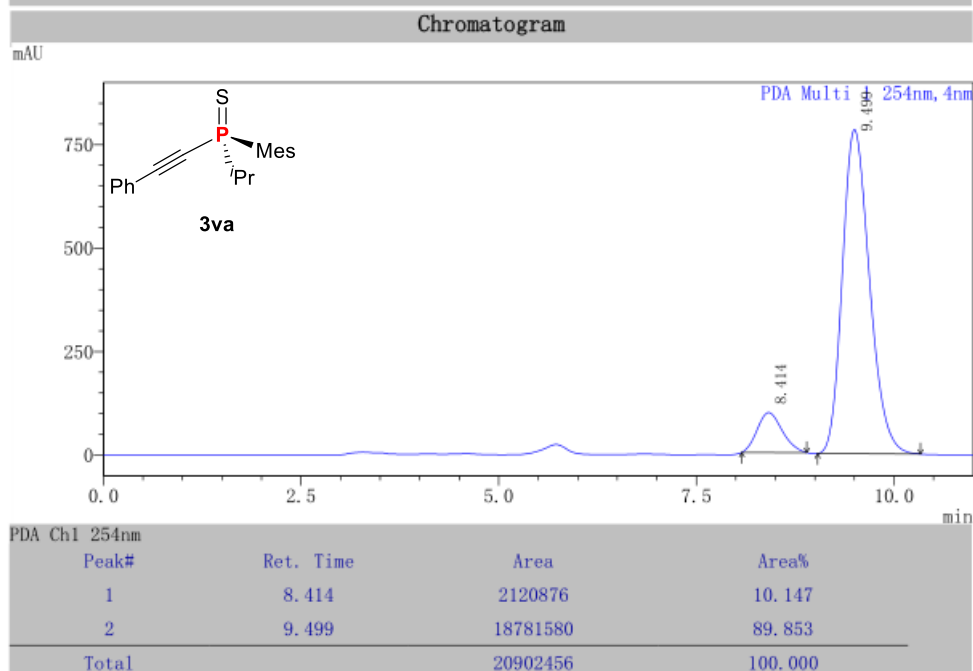

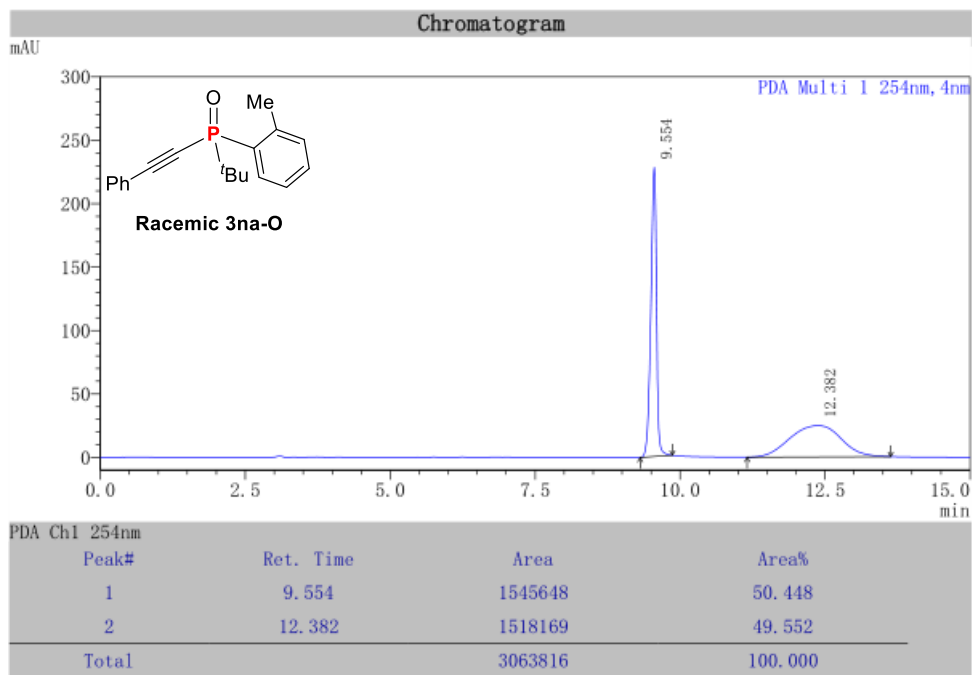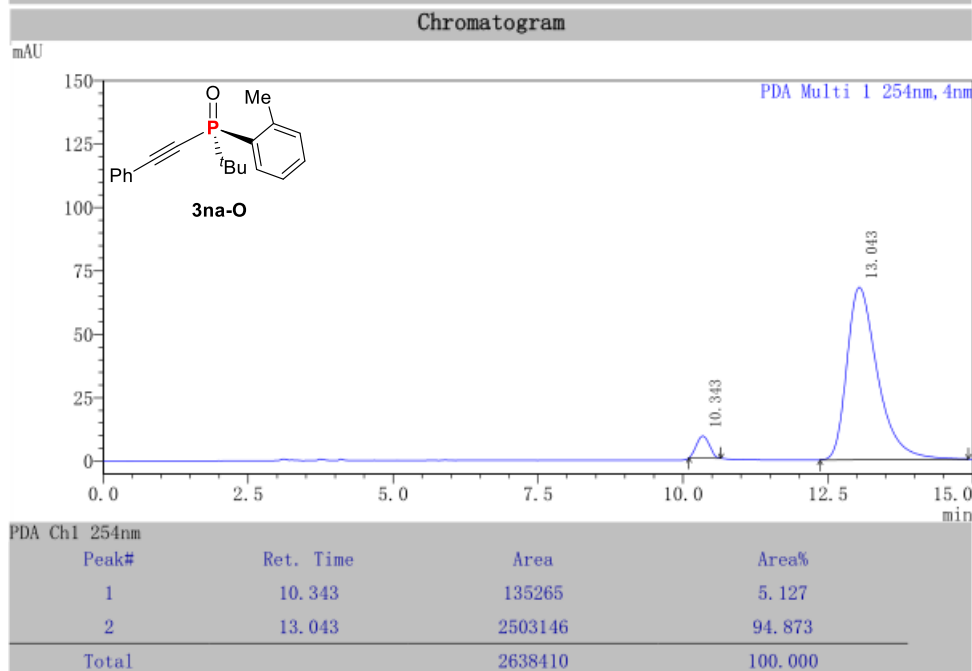

Chromatogram

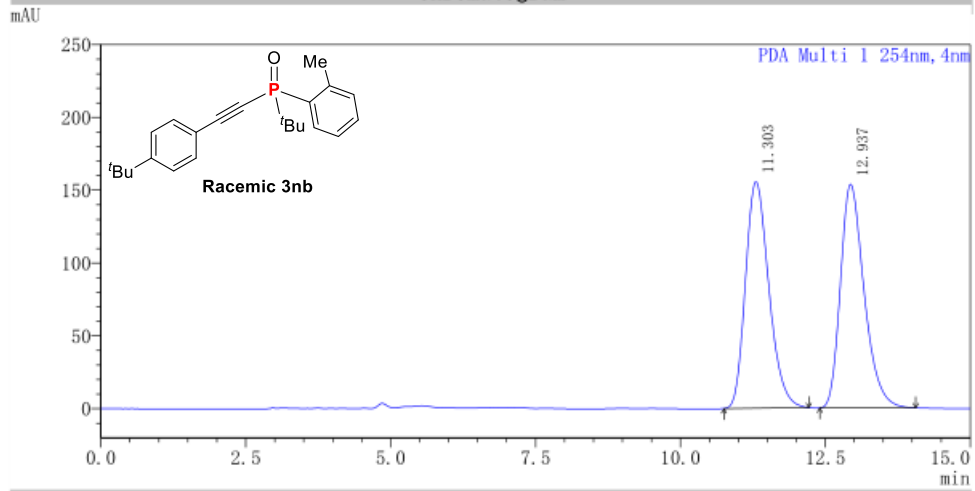

| Peak#        | Ret. Time | Area           | Area%          |
|--------------|-----------|----------------|----------------|
| 1            | 11.303    | 4377882        | 49.980         |
| 2            | 12.937    | 4381358        | 50.020         |
| <b>Total</b> |           | <b>8759240</b> | <b>100.000</b> |

Chromatogram

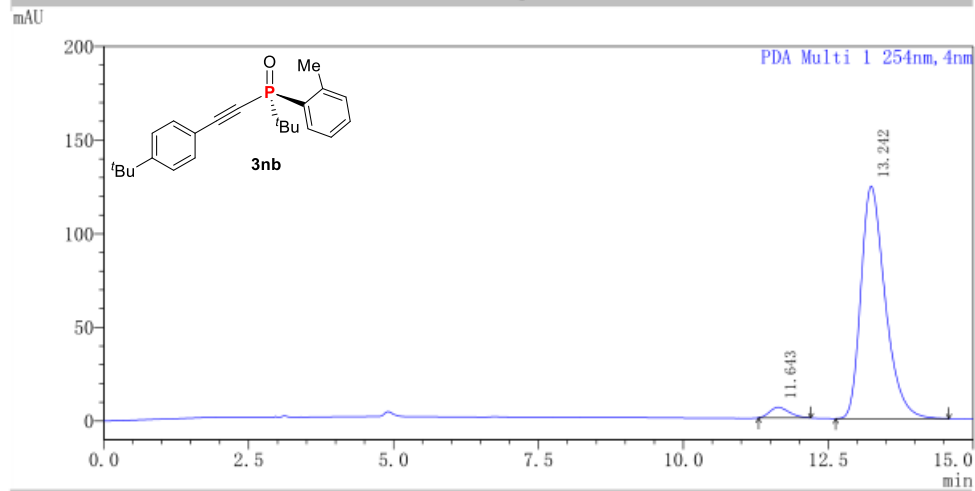

| Peak#        | Ret. Time | Area           | Area%          |
|--------------|-----------|----------------|----------------|
| 1            | 11.643    | 133740         | 3.558          |
| 2            | 13.242    | 3624896        | 96.442         |
| <b>Total</b> |           | <b>3758635</b> | <b>100.000</b> |



### Chromatogram

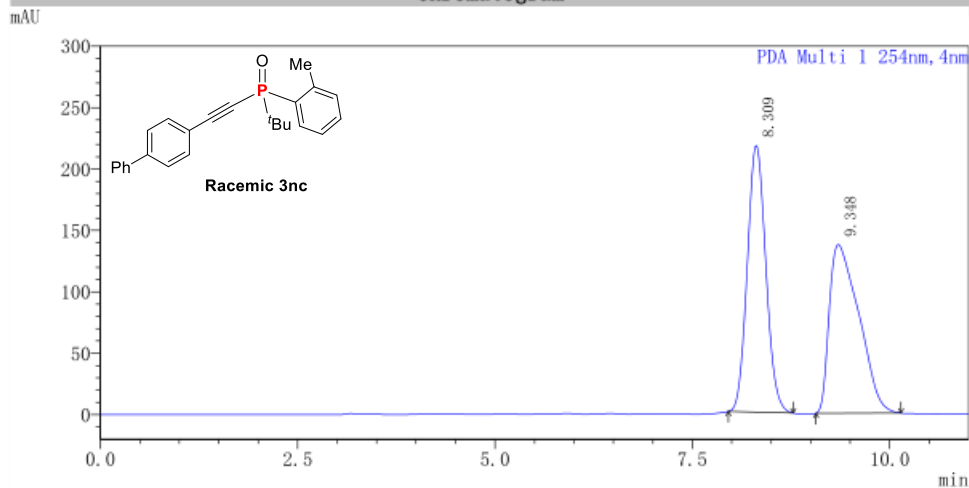

| Peak#        | Ret. Time | Area           | Area%          |
|--------------|-----------|----------------|----------------|
| 1            | 8.309     | 3541938        | 49.723         |
| 2            | 9.348     | 3581464        | 50.277         |
| <b>Total</b> |           | <b>7123403</b> | <b>100.000</b> |

### Chromatogram

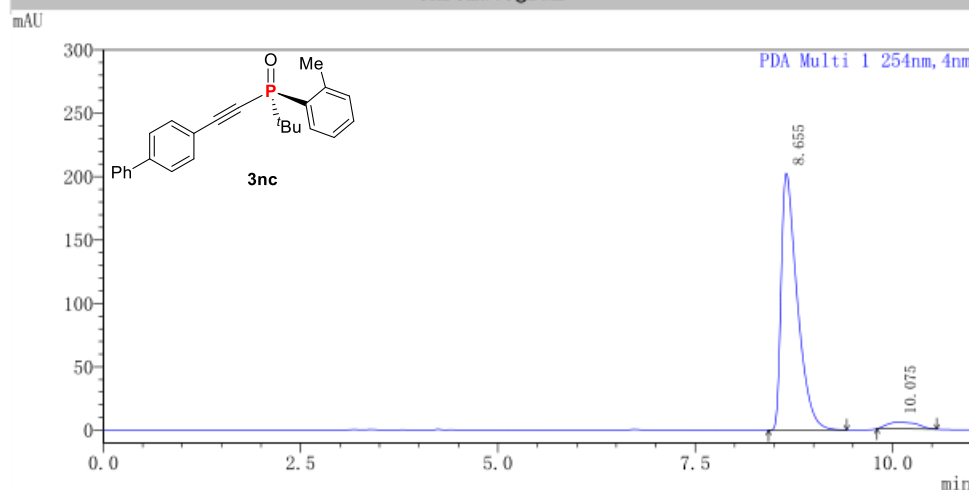

| Peak#        | Ret. Time | Area           | Area%          |
|--------------|-----------|----------------|----------------|
| 1            | 8.655     | 2877125        | 95.293         |
| 2            | 10.075    | 142115         | 4.707          |
| <b>Total</b> |           | <b>3019240</b> | <b>100.000</b> |

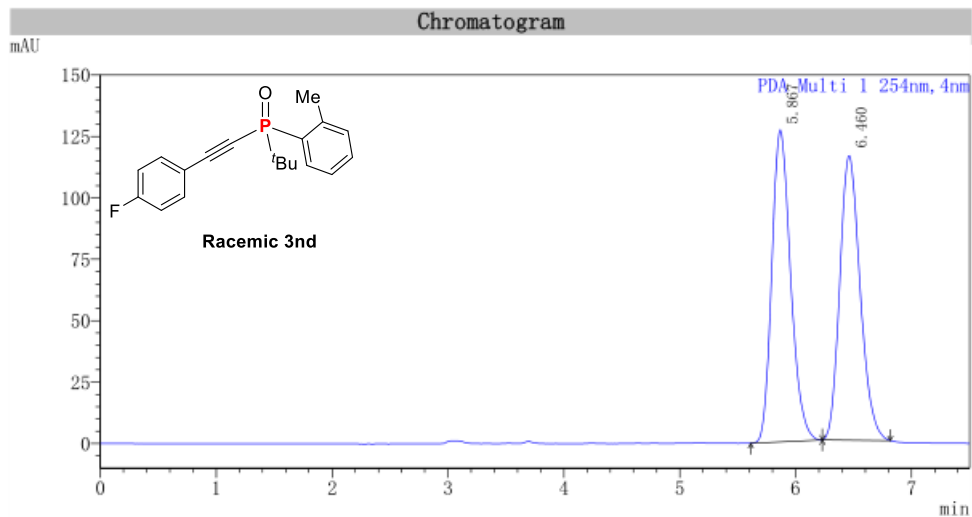

PDA Ch1 254nm

| Peak#        | Ret. Time | Area           | Area%          |
|--------------|-----------|----------------|----------------|
| 1            | 5.867     | 1433372        | 50.300         |
| 2            | 6.460     | 1416255        | 49.700         |
| <b>Total</b> |           | <b>2849627</b> | <b>100.000</b> |

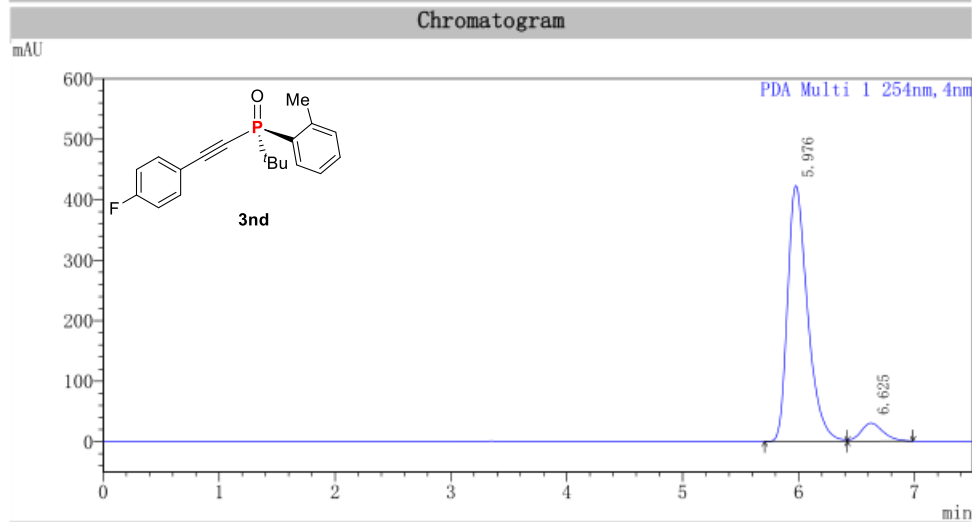

PDA Ch1 254nm

| Peak#        | Ret. Time | Area           | Area%          |
|--------------|-----------|----------------|----------------|
| 1            | 5.976     | 5072523        | 92.743         |
| 2            | 6.625     | 396923         | 7.257          |
| <b>Total</b> |           | <b>5469446</b> | <b>100.000</b> |

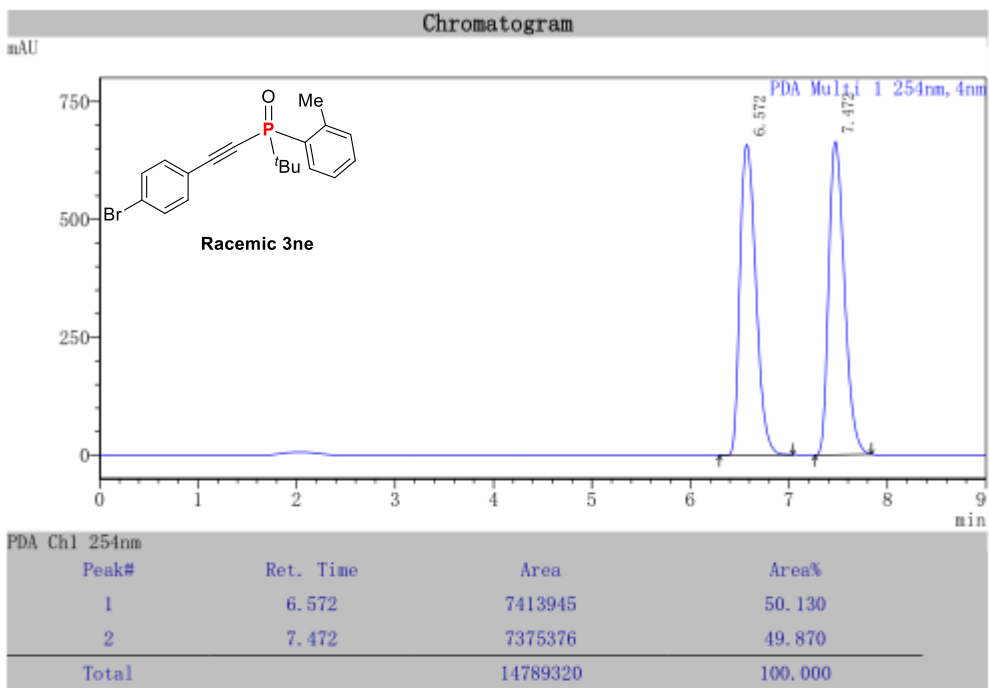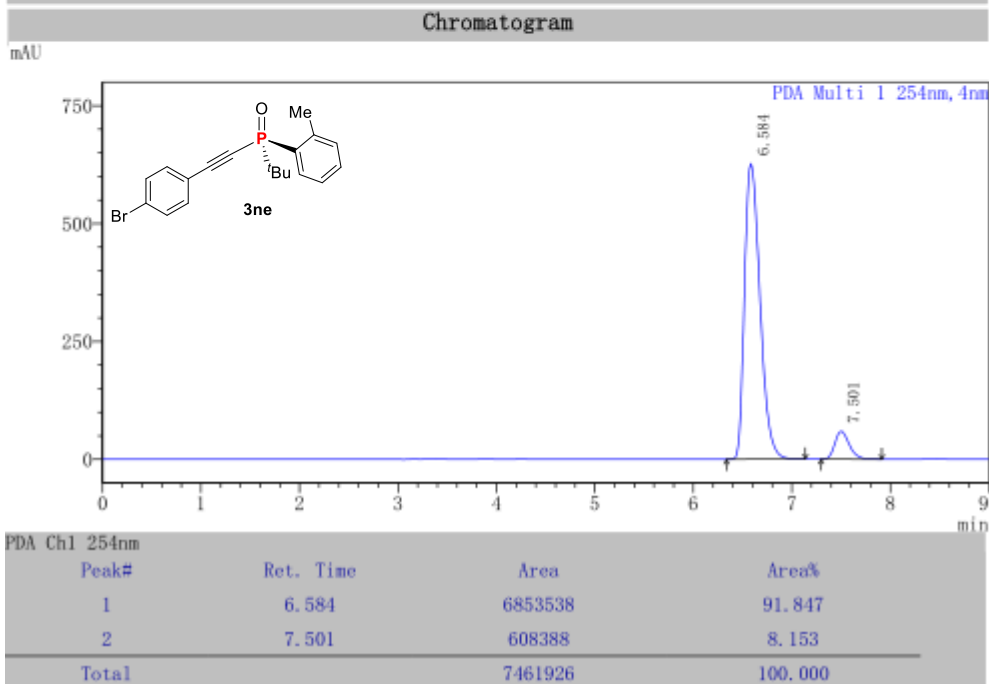

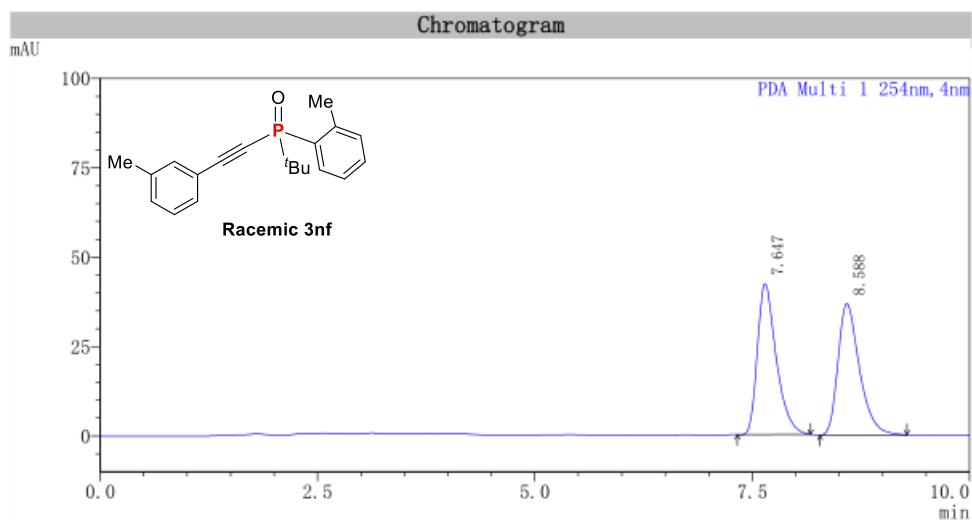

PDA Ch1 254nm

| Peak#        | Ret. Time | Area           | Area%          |
|--------------|-----------|----------------|----------------|
| 1            | 7.647     | 637585         | 50.207         |
| 2            | 8.588     | 632340         | 49.793         |
| <b>Total</b> |           | <b>1269924</b> | <b>100.000</b> |

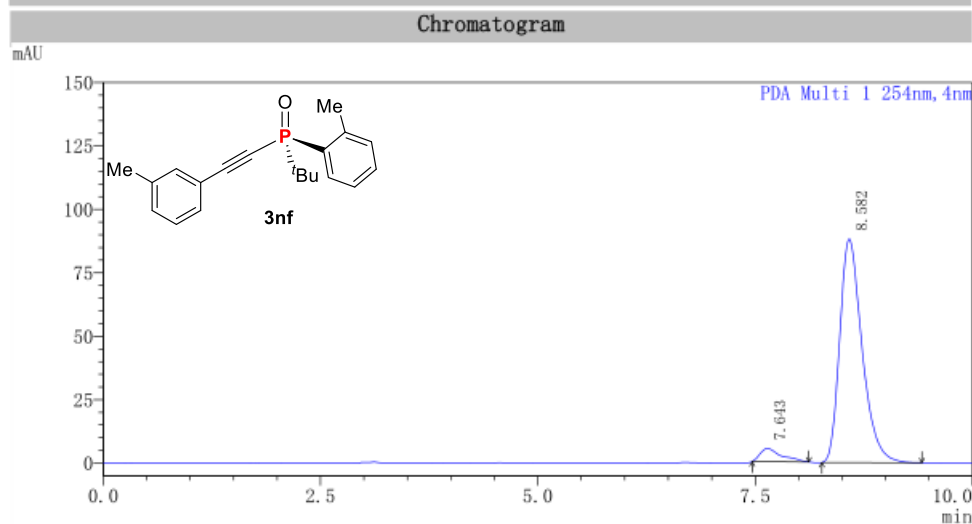

PDA Ch1 254nm

| Peak#        | Ret. Time | Area           | Area%          |
|--------------|-----------|----------------|----------------|
| 1            | 7.643     | 88391          | 5.310          |
| 2            | 8.582     | 1576261        | 94.690         |
| <b>Total</b> |           | <b>1664652</b> | <b>100.000</b> |

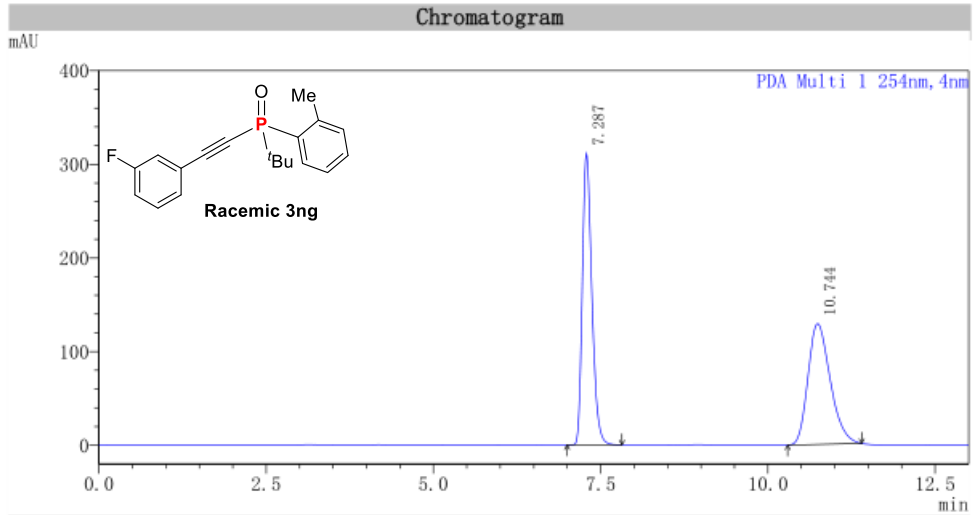

| Peak#        | Ret. Time | Area           | Area%          |
|--------------|-----------|----------------|----------------|
| 1            | 7.287     | 3053228        | 50.533         |
| 2            | 10.744    | 2988861        | 49.467         |
| <b>Total</b> |           | <b>6042089</b> | <b>100.000</b> |

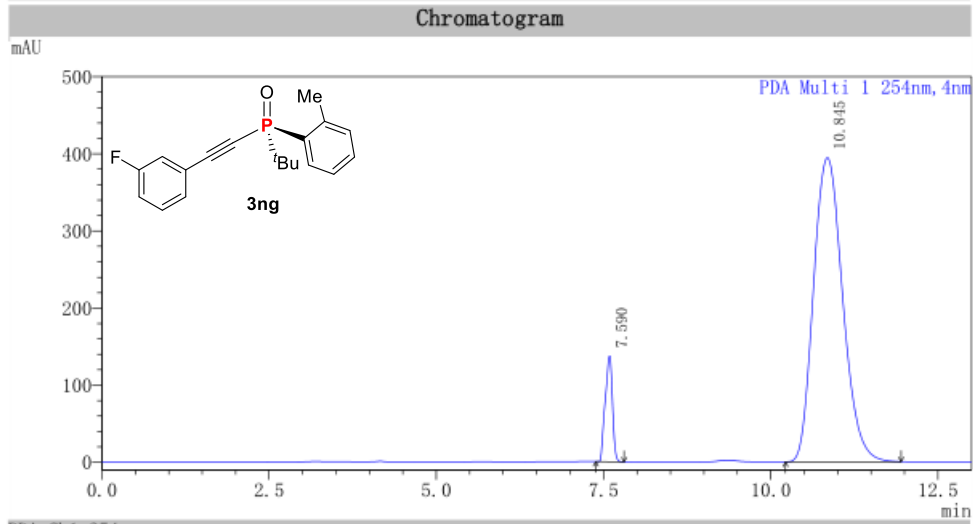

| Peak#        | Ret. Time | Area            | Area%          |
|--------------|-----------|-----------------|----------------|
| 1            | 7.590     | 1025828         | 7.896          |
| 2            | 10.845    | 11966533        | 92.104         |
| <b>Total</b> |           | <b>12992361</b> | <b>100.000</b> |

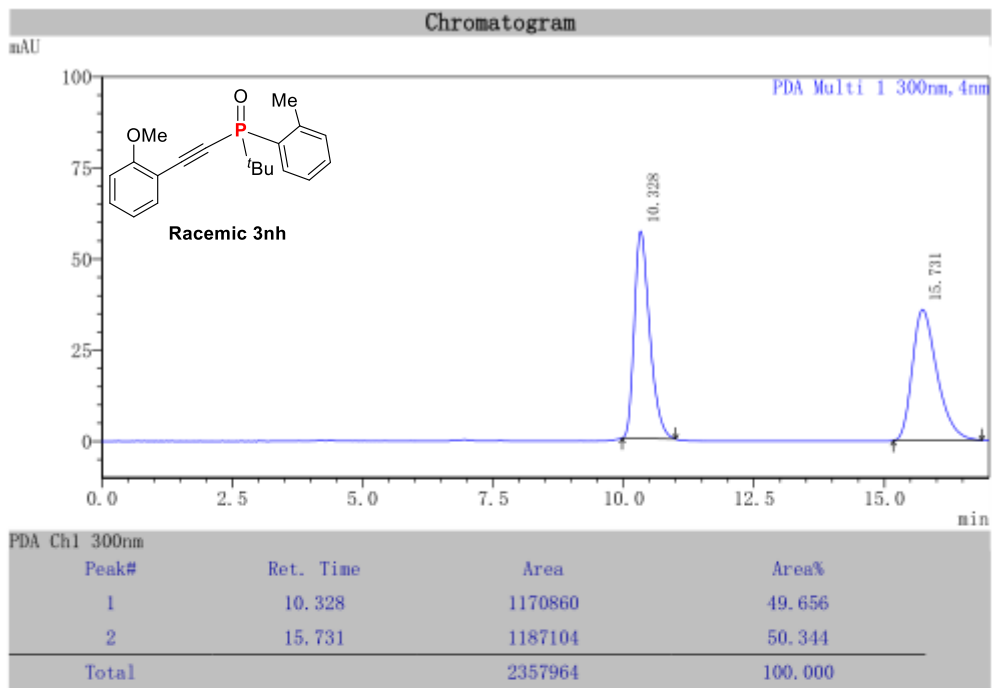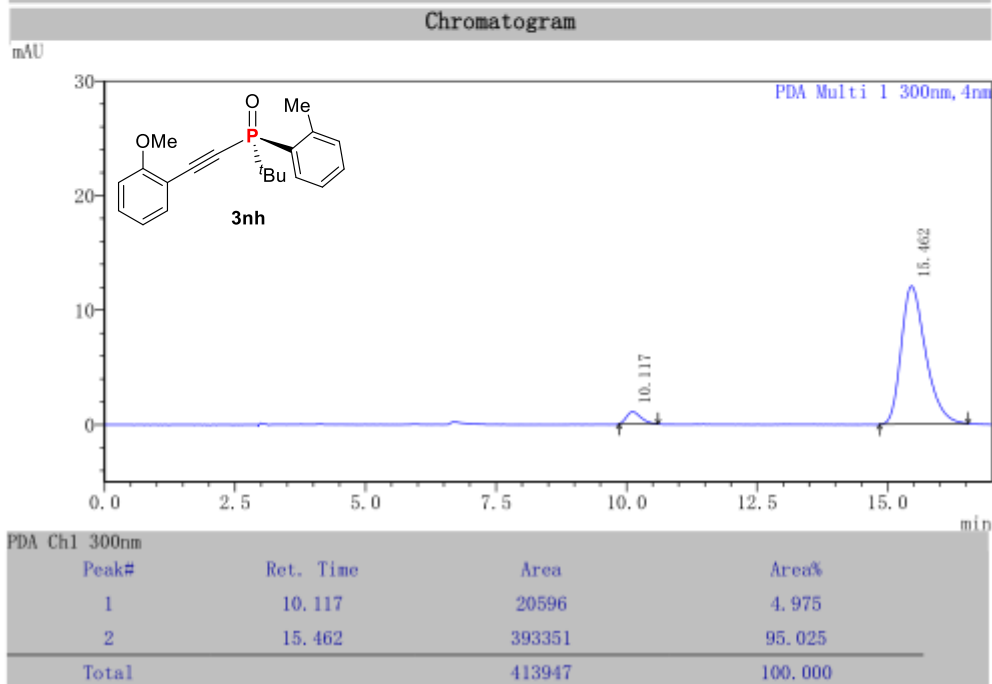

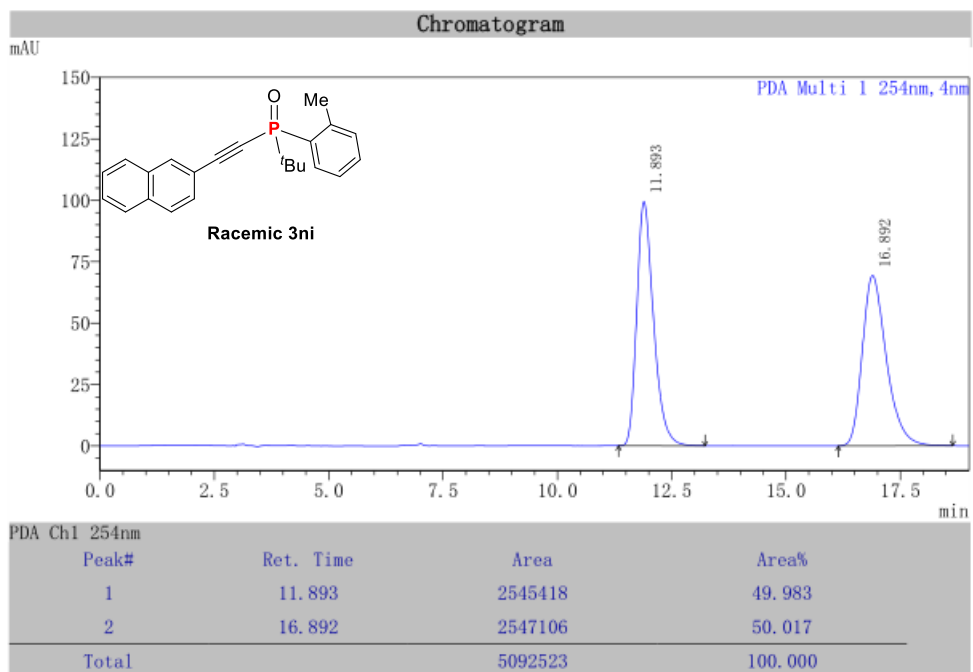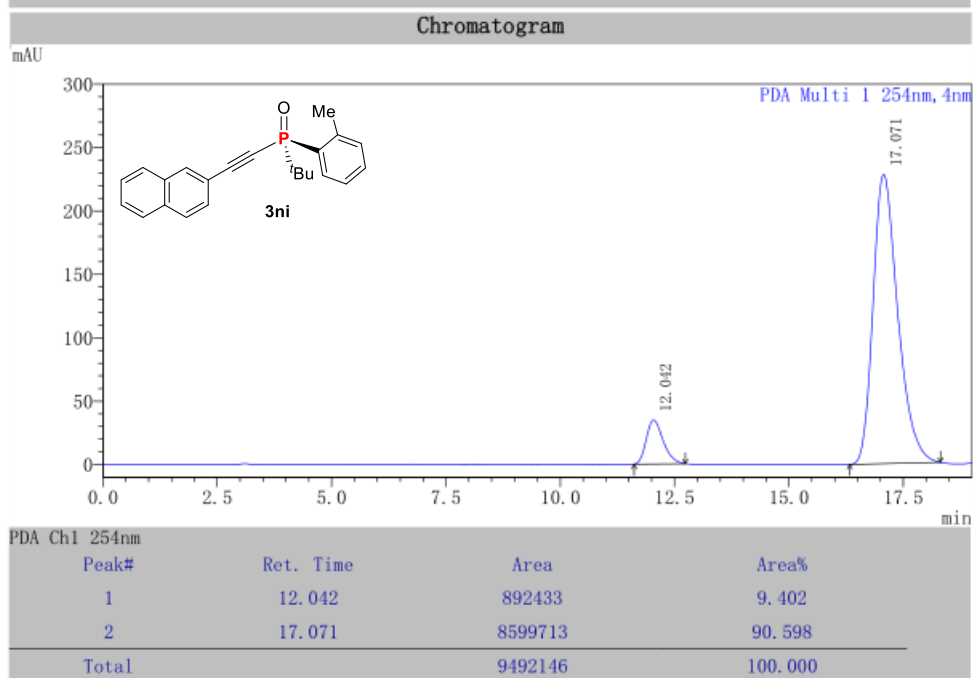

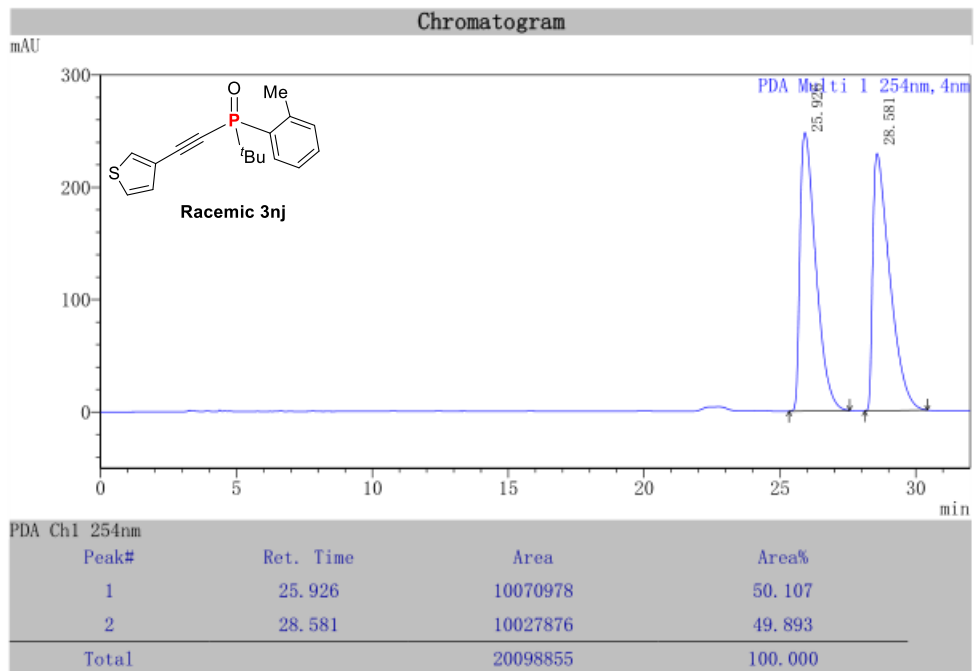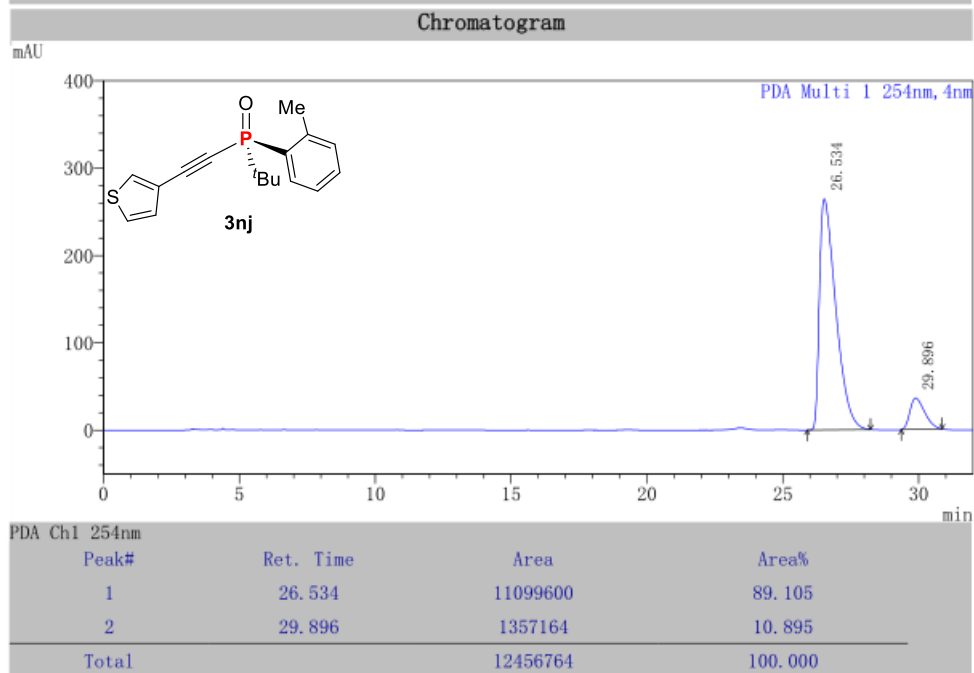



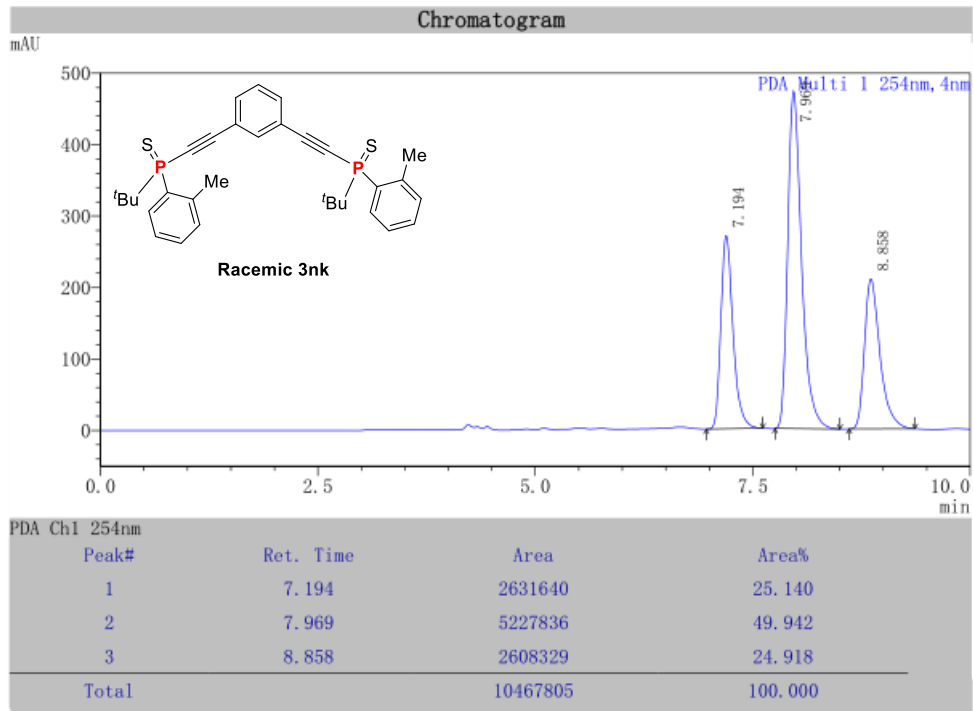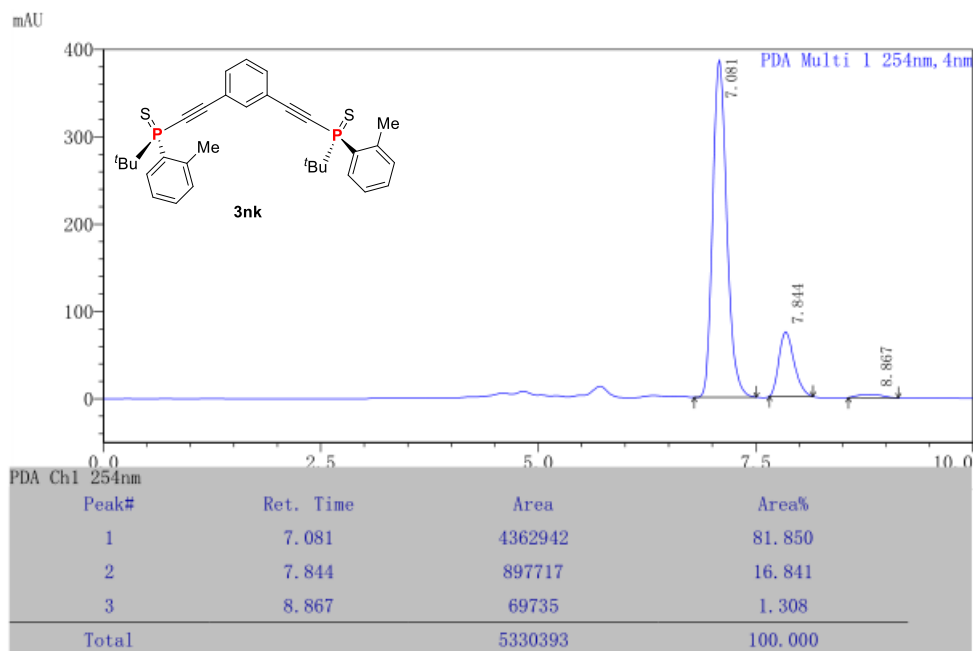

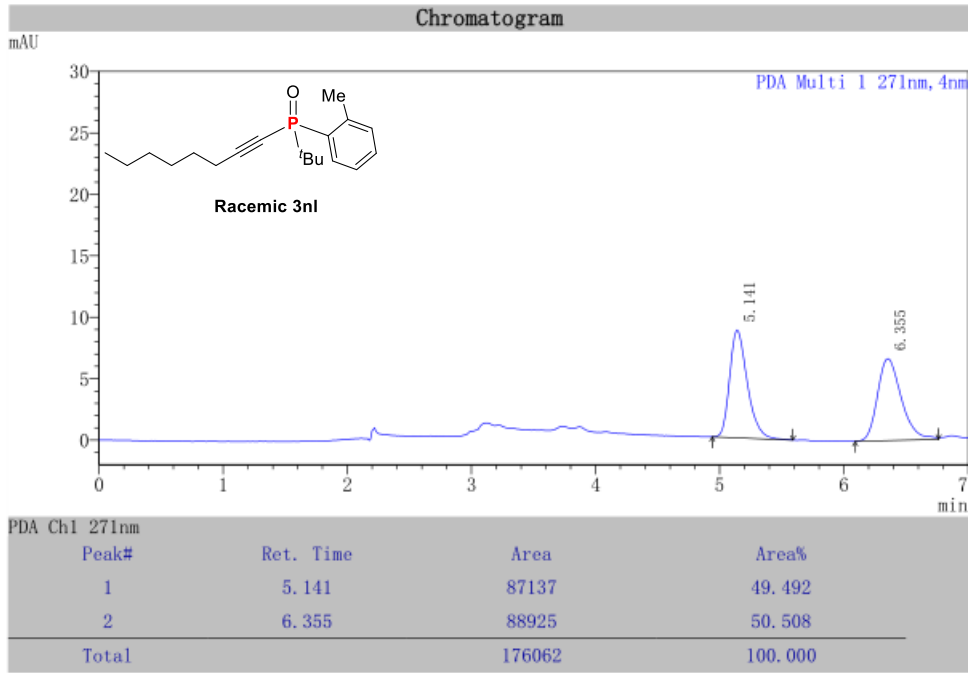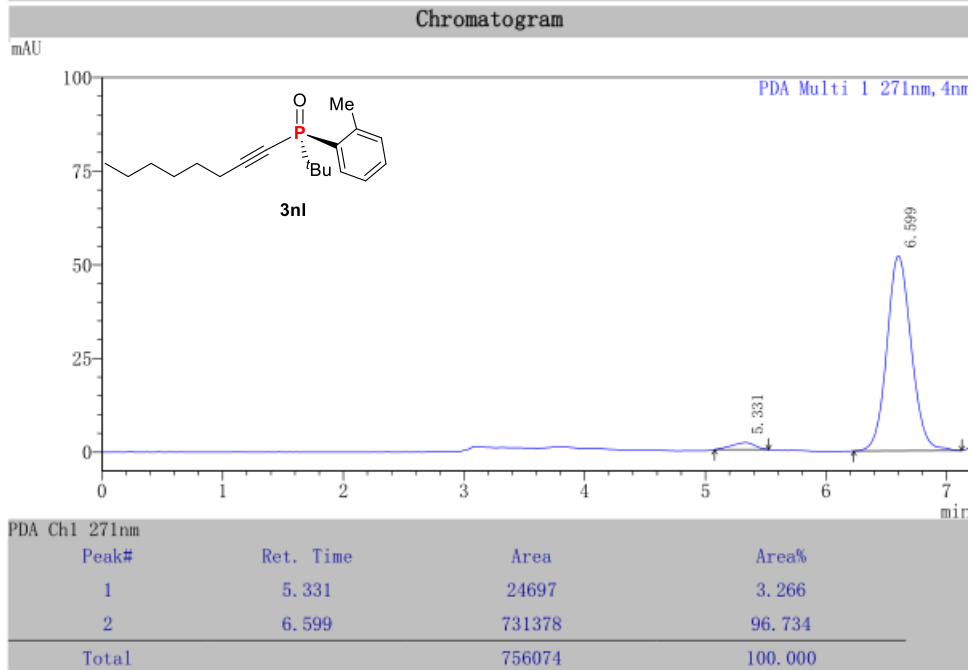

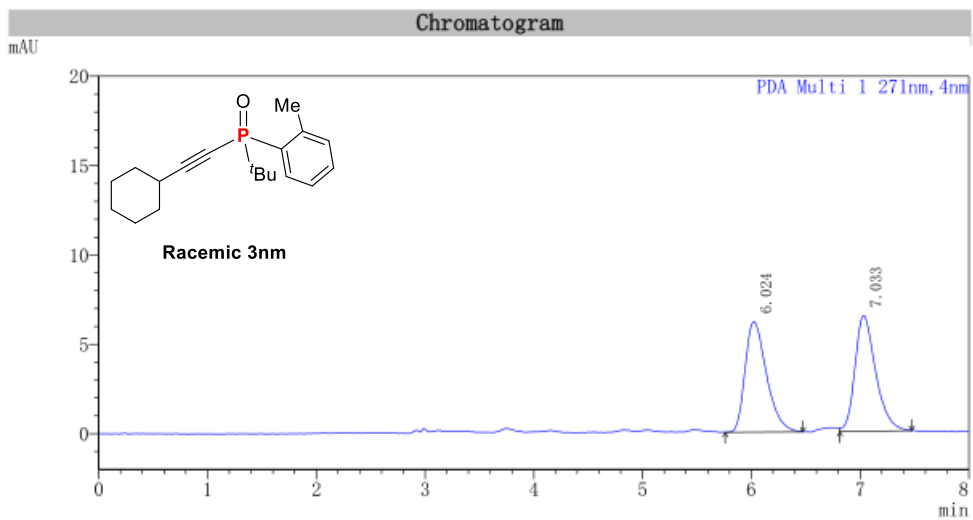

| Peak#        | Ret. Time | Area          | Area%          |
|--------------|-----------|---------------|----------------|
| 1            | 6.024     | 84971         | 49.776         |
| 2            | 7.033     | 85737         | 50.224         |
| <b>Total</b> |           | <b>170708</b> | <b>100.000</b> |

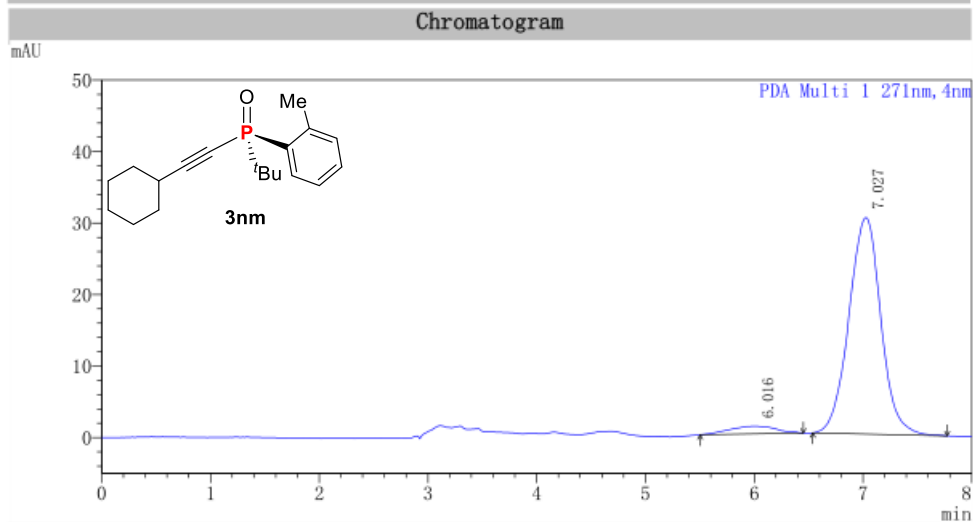

| Peak#        | Ret. Time | Area          | Area%          |
|--------------|-----------|---------------|----------------|
| 1            | 6.016     | 31351         | 4.827          |
| 2            | 7.027     | 618093        | 95.173         |
| <b>Total</b> |           | <b>649444</b> | <b>100.000</b> |

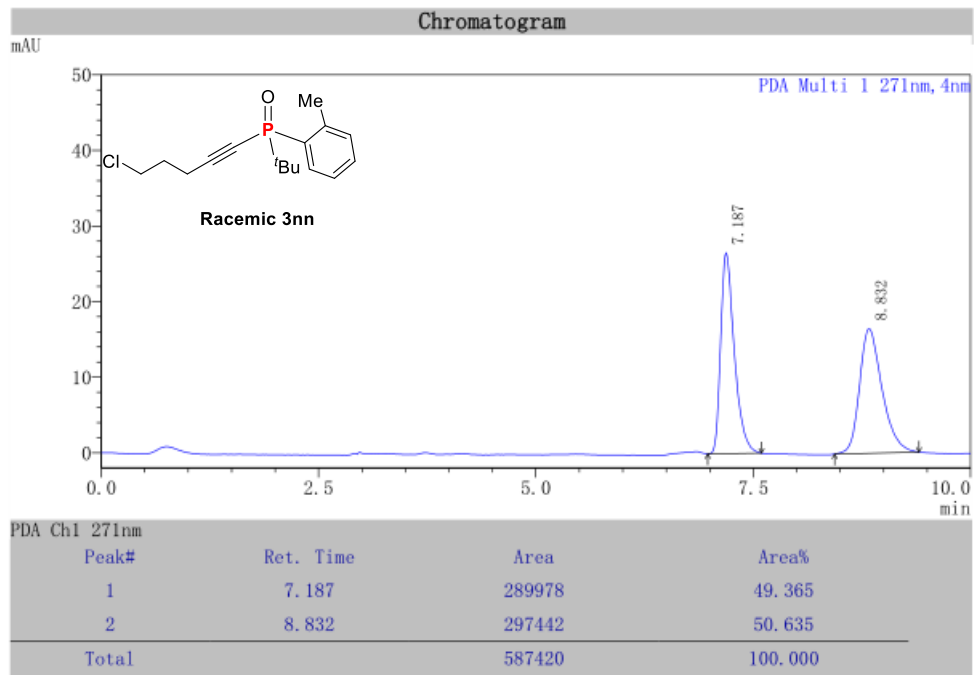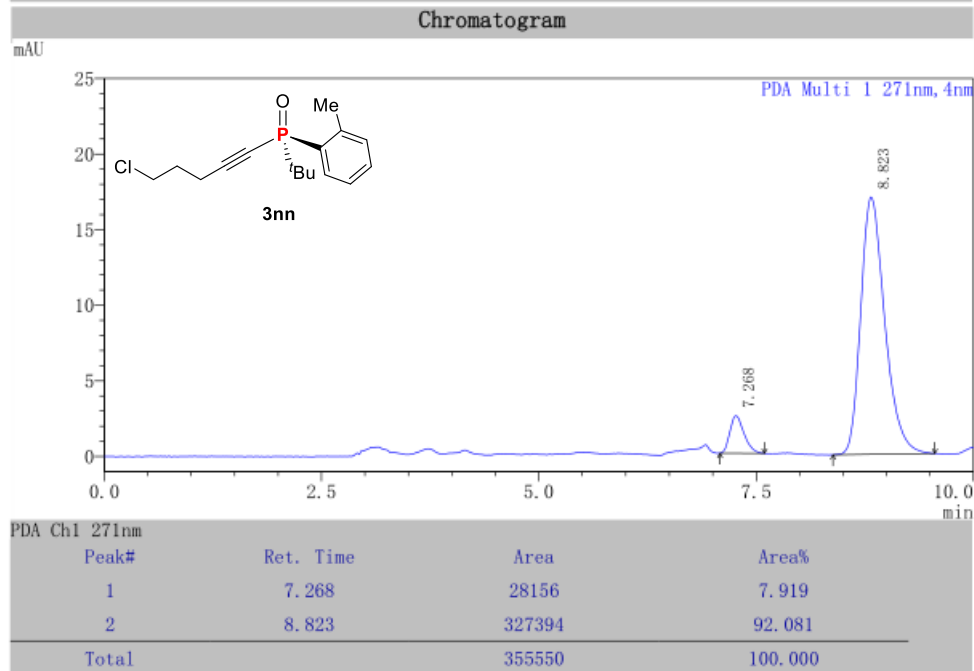

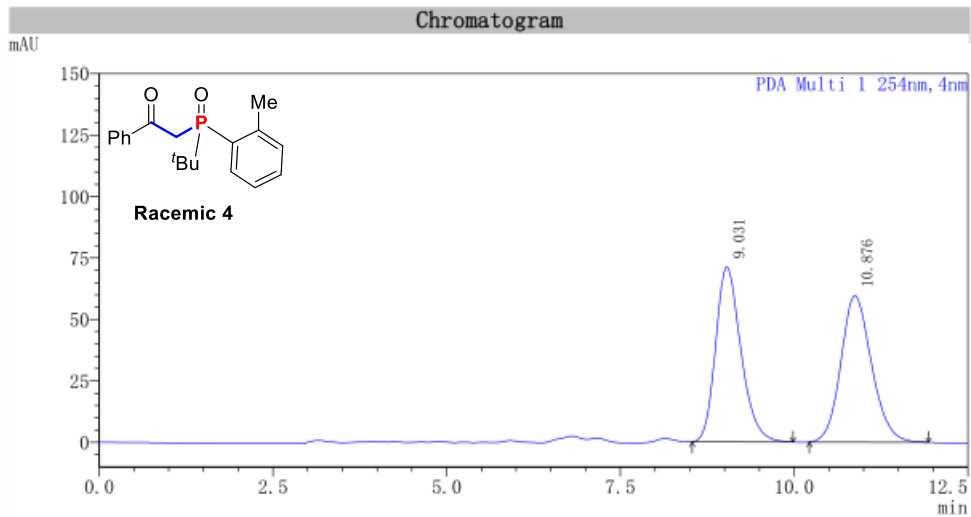

| Peak#        | Ret. Time | Area           | Area%          |
|--------------|-----------|----------------|----------------|
| 1            | 9.031     | 1808830        | 49.609         |
| 2            | 10.876    | 1837373        | 50.391         |
| <b>Total</b> |           | <b>3646203</b> | <b>100.000</b> |

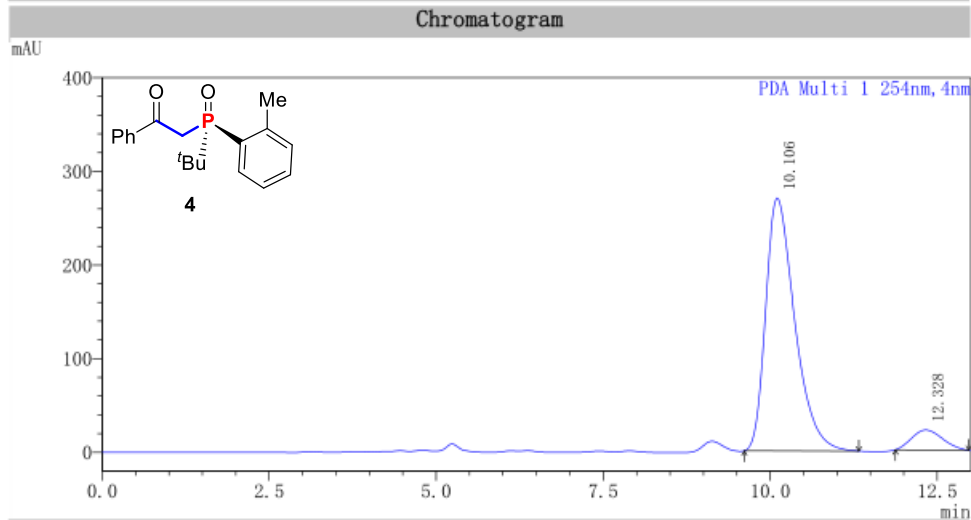

| Peak#        | Ret. Time | Area           | Area%          |
|--------------|-----------|----------------|----------------|
| 1            | 10.106    | 8191052        | 92.265         |
| 2            | 12.328    | 686736         | 7.735          |
| <b>Total</b> |           | <b>8877788</b> | <b>100.000</b> |

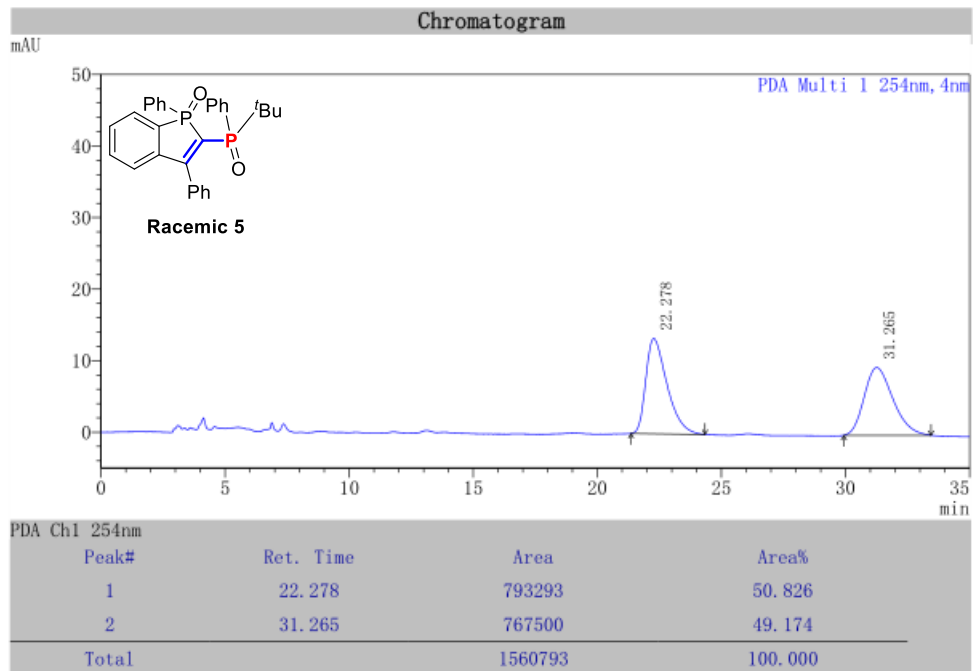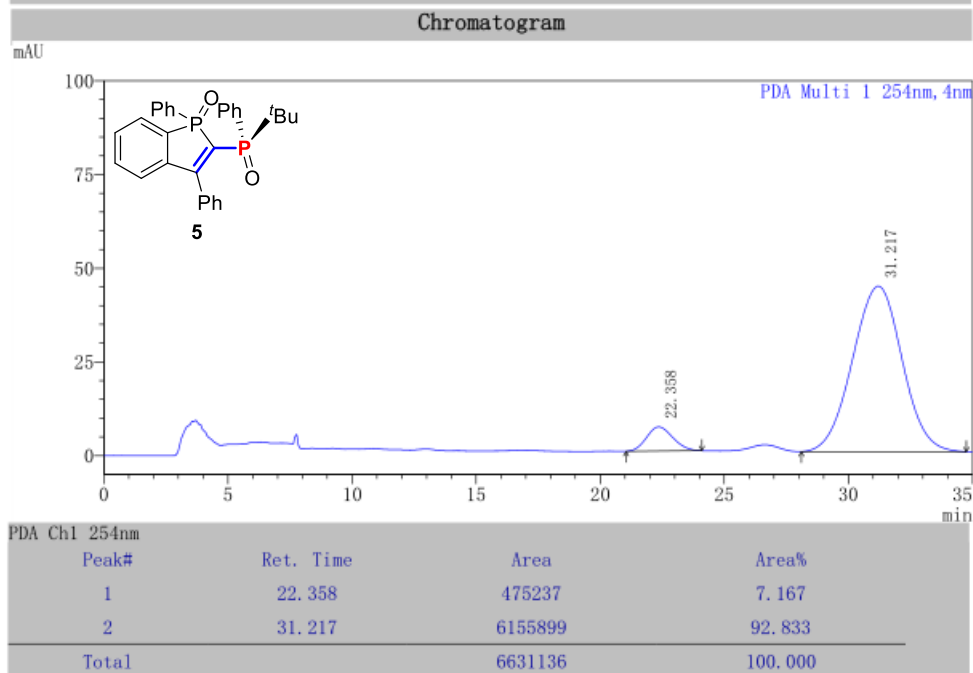

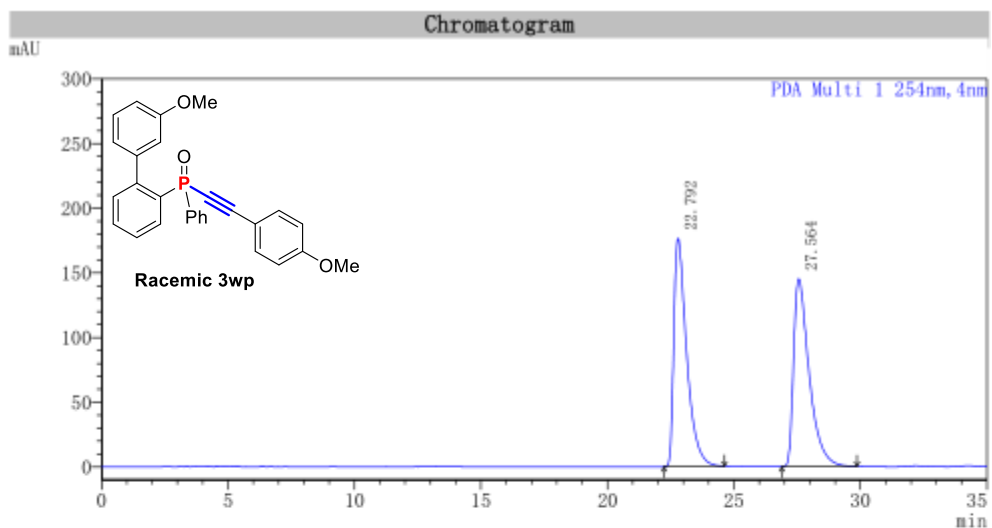

| Peak#        | Ret. Time | Area            | Area%          |
|--------------|-----------|-----------------|----------------|
| 1            | 22.792    | 6242698         | 49.973         |
| 2            | 27.564    | 6249568         | 50.027         |
| <b>Total</b> |           | <b>12492267</b> | <b>100.000</b> |

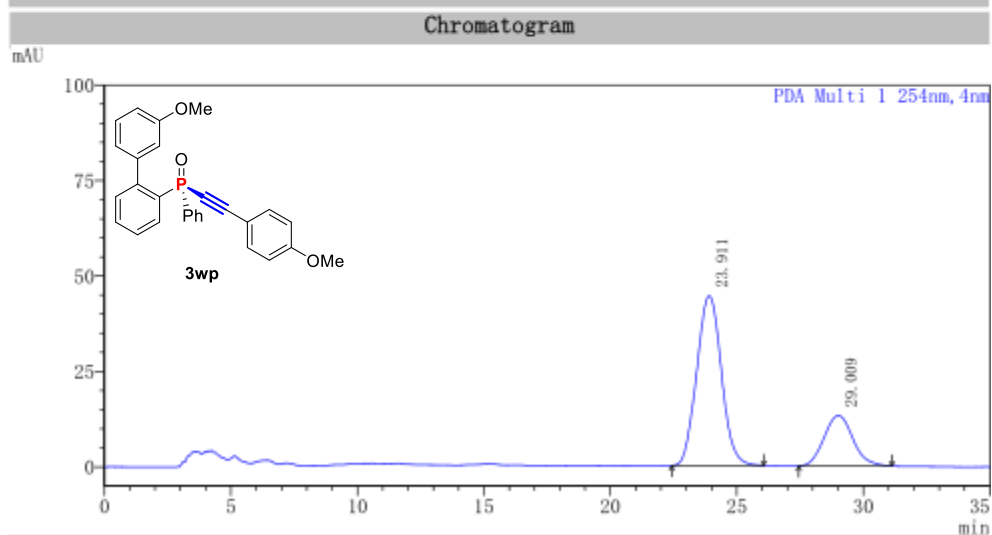

| Peak#        | Ret. Time | Area           | Area%          |
|--------------|-----------|----------------|----------------|
| 1            | 23.911    | 3020277        | 74.122         |
| 2            | 29.009    | 1054438        | 25.878         |
| <b>Total</b> |           | <b>4074714</b> | <b>100.000</b> |

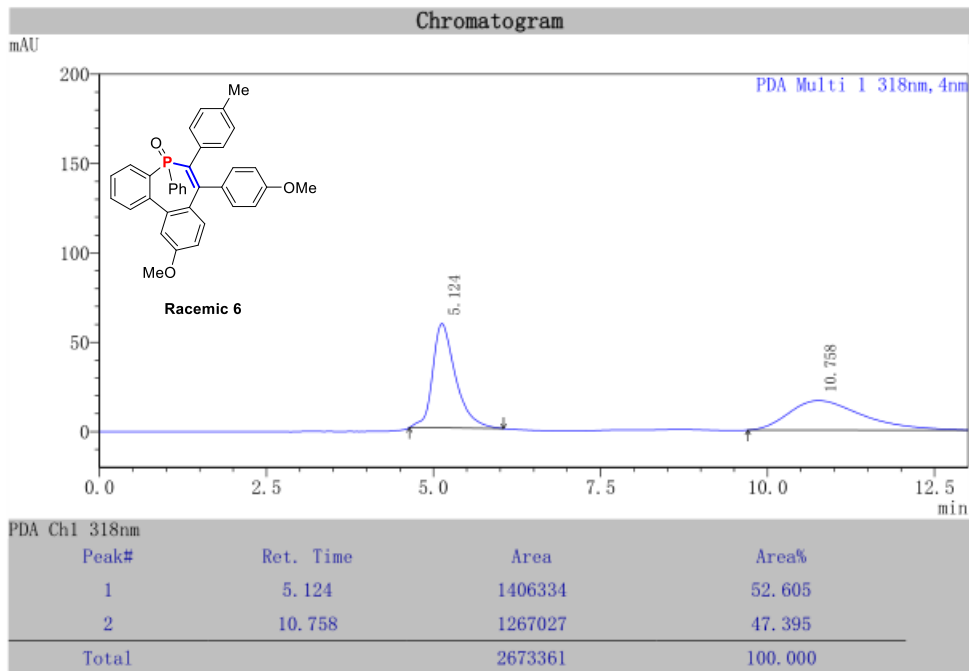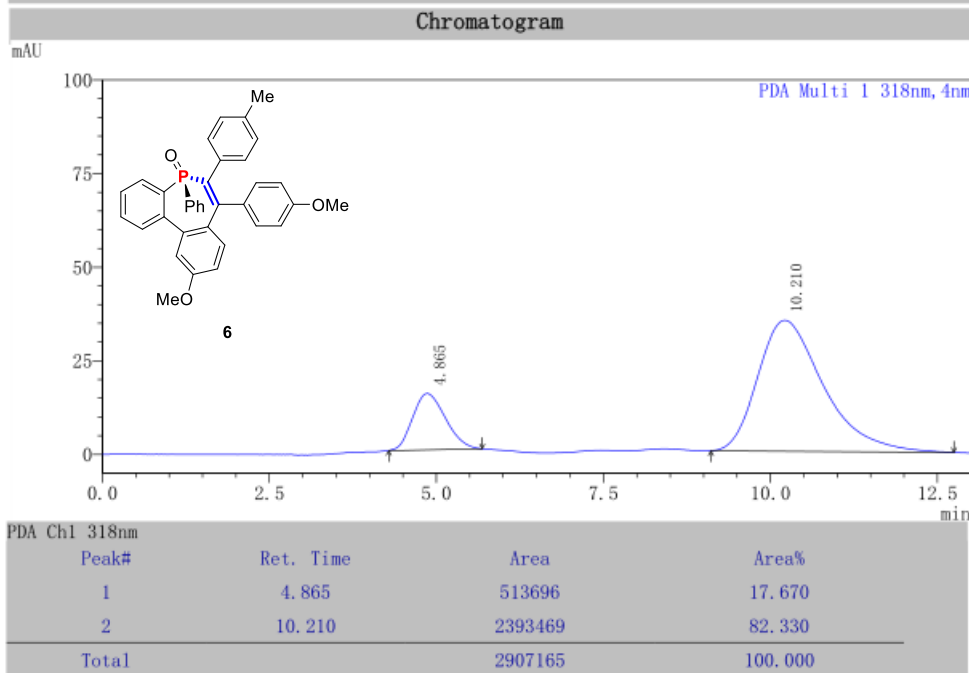



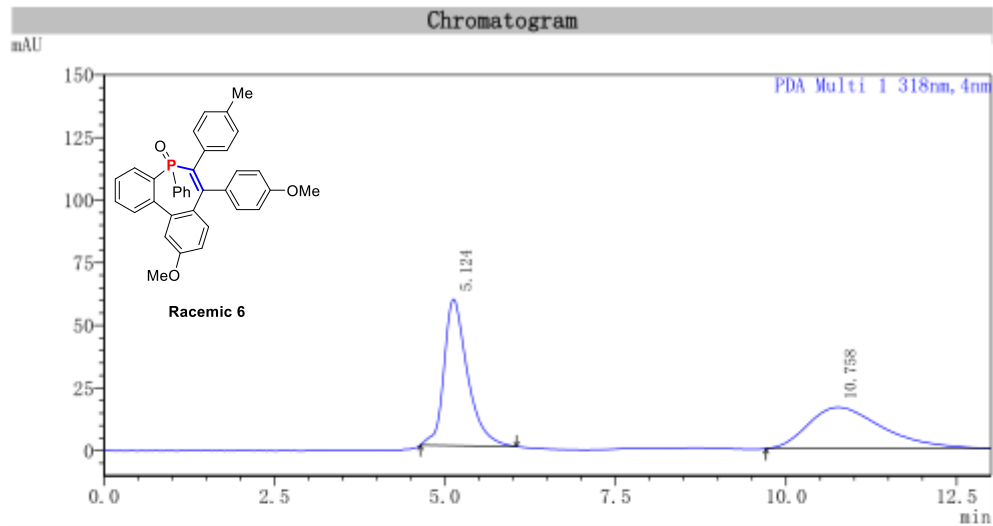

PDA Ch1 318nm

| Peak#        | Ret. Time | Area           | Area%          |
|--------------|-----------|----------------|----------------|
| 1            | 5.124     | 1406334        | 52.605         |
| 2            | 10.758    | 1267027        | 47.395         |
| <b>Total</b> |           | <b>2673361</b> | <b>100.000</b> |

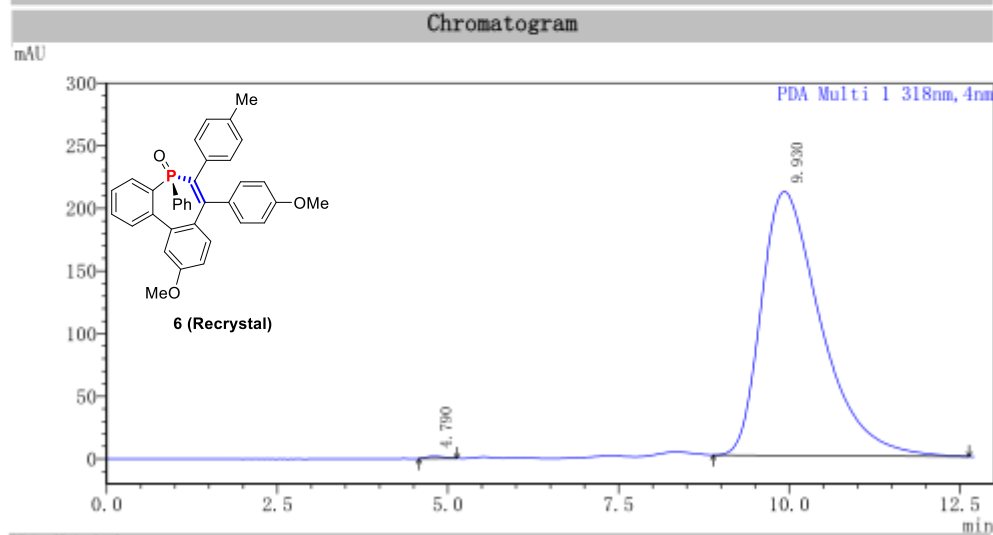

PDA Ch1 318nm

| Peak#        | Ret. Time | Area            | Area%          |
|--------------|-----------|-----------------|----------------|
| 1            | 4.790     | 31351           | 0.244          |
| 2            | 9.930     | 12810222        | 99.756         |
| <b>Total</b> |           | <b>12841574</b> | <b>100.000</b> |

## 10. References

- S1. F. A. Kortmann, M. C. Chang, E. Otten, E. P. Couzijn, M. Lutz, A. J. Minnaard, *Chem. Sci.*, 2014, **5**, 1322-1327.
- S2. R. Beaud, R. J. Phipps, M. J. Gaunt, *J. Am. Chem. Soc.*, 2016, **138**, 13183-13186.
- S3. L. Duan, K. Zhao, Z. Wang, F. L. Zhang, Z. Gu, *ACS Catal.*, 2019, **9**, 9852-9858.
- S4. Y. Liu, B. Ding, D. Liu, Z. Zhang, Y. Liu, W. Zhang, *Res. Chem. Intermed.*, 2017, **43**, 4959-4966.
- S5. B. M. Trost, S. M. Spohr, A. B. Rolka, C. A. Kalnmals, *J. Am. Chem. Soc.*, 2019, **141**, 14098-14103.
- S6. Z. Chen, H. Jiang, Y. Li, C. Qi, *Chem. Commun.*, 2010, **46**, 8049-8051.
- S7. Y. Gao, G. Wu, Q. Zhou, J.-B. Wang, *Angew. Chem. Int. Ed.*, 2018, **57**, 2716-2720.
- S8. J. Santandrea, C. Minozzi, C. Cruch, S. K. Collins, *Angew. Chem. Int. Ed.*, 2017, **56**, 12255-12259.
- S9. W. Wang, F. Wei, Y. Ma, C.-H. Tung, Z. Xu, *Org. Lett.*, 2016, **18**, 4158-4161.
